1 **Two transcriptionally distinct pathways drive female development in a**  
2 **reptile with both genetic and temperature dependent sex determination**

3

4 Sarah L. Whiteley<sup>1,2</sup>, Clare E. Holleley<sup>2</sup>, Susan Wagner<sup>1</sup>, James Blackburn<sup>3,4</sup>, Ira W.  
5 Deveson<sup>3,4</sup>, Jennifer A. Marshall Graves<sup>1,5</sup>, Arthur Georges<sup>1\*</sup>

6

7 Institutional Affiliations

8 <sup>1</sup>Institute for Applied Ecology, University of Canberra, Australia

9 <sup>2</sup> Australian National Wildlife Collection CSIRO National Research Collections Australia,  
10 Canberra, Australia

11 <sup>3</sup>Garvan Institute of Medical Research, Sydney, Australia

12 <sup>4</sup> St. Vincent's Clinical School, UNSW, Sydney, Australia

13 <sup>5</sup> Latrobe University, Melbourne, Australia.

14

15 \*Corresponding author: [georges@aerg.canberra.edu.au](mailto:georges@aerg.canberra.edu.au), Ph: +61 418866741

16

17

18

19

20

21

22

23

24

25

26

27

28

29

30

31

32

33

34

35

36

37

38

39

40

41

42

## 43 **Abstract**

44 How temperature determines sex remains unknown. A recent hypothesis proposes that  
45 conserved cellular mechanisms (calcium and redox; 'CaRe' status) sense temperature and  
46 identify genes and regulatory pathways likely to be involved in driving sexual development.  
47 We take advantage of the unique sex determining system of the model organism, *Pogona*  
48 *vitticeps*, to assess predictions of this hypothesis. *P. vitticeps* has ZZ male: ZW female sex  
49 chromosomes whose influence can be overridden in genetic males by high temperatures,  
50 causing male-to-female sex reversal. We compare a developmental transcriptome series of  
51 ZWf females and temperature sex reversed ZZf females. We demonstrate that early  
52 developmental cascades differ dramatically between genetically driven and thermally driven  
53 females, later converging to produce a common outcome (ovaries). We show that genes  
54 proposed as regulators of thermosensitive sex determination play a role in temperature sex  
55 reversal. Our study greatly advances the search for the mechanisms by which temperature  
56 determines sex.

## 57 **Author Summary**

58 In many reptiles and fish, environment can determine, or influence, the sex of developing  
59 embryos. How this happens at a molecular level that has eluded resolution for half a century  
60 of intensive research. We studied the bearded dragon, a lizard that has sex chromosomes  
61 (ZZ male and ZW female), but in which that temperature can override ZZ sex chromosomes  
62 to cause male to female sex reversal. This provides an unparalleled opportunity to  
63 disentangle, in the same species, the biochemical pathways required to make a female by  
64 these two different routes. We sequenced the transcriptomes of gonads from developing ZZ  
65 reversed and normal ZW dragon embryos and discovered that different sets of genes are  
66 active in ovary development driven by genotype or temperature. Females whose sex was  
67 initiated by temperature showed a transcriptional profile consistent with the recently-  
68 proposed Calcium-Redox hypotheses of cellular temperature sensing. These findings are an  
69 important for understanding how the environment influences the development of sex, and  
70 more generally how the environment can epigenetically modify the action of genes.

71

72 **Key words**

73 Sex reversal, gonad differentiation, thermosensitivity, calcium signalling, oxidative stress

74 **Introduction**

75 Sex determination in vertebrates may be genetic or environmental. In genetic sex  
76 determination (GSD), offspring sex is determined by sex chromosomes inherited from each  
77 parent, which bear either a dominant gene on the heteromorphic sex chromosome (as with  
78 *SRY* in humans) (1,2), or a dosage sensitive gene on the homomorphic sex chromosome (as  
79 with *DMRT1* in birds) (3). However, some fish and many reptile species exhibit  
80 environmental sex determination (ESD), whereby a variety of external stimuli can determine  
81 sex, most commonly involving temperature (temperature dependent sex determination,  
82 TSD) (4,5). While GSD and ESD are commonly viewed as a dichotomy, the reality is far more  
83 complex. Sex determination in vertebrates exists as a continuum of genetic and  
84 environmental influences (6) whereby genes and environment can interact to determine sex  
85 (7–9).

86 The genetic mechanisms that act in highly conserved pathways that ultimately yield testes  
87 or ovaries are quite well characterised (5,10,11). Yet, despite decades of research on ESD  
88 systems, and TSD in particular, the upstream mechanisms by which an external signal is  
89 transduced to determine sex remains unknown (12). Recent research led to the hypothesis  
90 that the cellular sensor initiating ESD is controlled by the balance of redox regulation and  
91 calcium ( $\text{Ca}^{2+}$ ) signalling (CaRe) (13). The CaRe hypothesis proposes a link between CaRe  
92 sensitive cellular signalling and the highly conserved epigenetic processes that have been  
93 implicated in thermolabile sex (TSD and temperature sex reversal) (12,14–17). The CaRe  
94 hypothesis posits that in ESD systems a change in intracellular  $\text{Ca}^{2+}$  (probably mediated by  
95 thermosensitive transient receptor potential TRP channels) and increased reactive oxygen  
96 species (ROS) levels caused by high temperatures, alter the CaRe status of the cell, triggering  
97 cellular signalling cascades that drive differential sex-specific expression of genes to  
98 determine sex. The CaRe hypothesis makes several testable predictions for how an  
99 environmental signal is captured and transduced by the gonadal cells to deliver a male or a  
100 female phenotype.

101 Species in which genes and environment both influence sex determination provide  
102 unique opportunities to directly compare the regulatory and developmental processes  
103 involved in sex determination. By early gonad differentiation directed by genotype and  
104 temperature, it is possible to assess predictions of the CaRe hypothesis. In our model  
105 species, the central bearded dragon (*Pogona vitticeps*), we can compare female  
106 development via thermal and genetic cues because extreme temperatures (>32°C) override  
107 the male sex-determining signal from the ZZ sex micro-chromosomes to feminise embryos  
108 (8,18). This makes it possible to distinguish between the previously confounded effects of  
109 thermal stress and phenotypic sex by comparing gene expression throughout embryonic  
110 development in sex reversed ZZf females with genetic ZWf females.

111 We can explore the predictions of the CaRe model, namely that under sex-reversing  
112 conditions, we will see differential regulation of: 1) genes involved in responding to Ca<sup>2+</sup>  
113 influx and signalling; 2) genes involved in antioxidant and/or oxidative stress responses; 3)  
114 genes with known thermosensitivity, such as heat shock proteins; 4) candidate TSD genes,  
115 such as *CIRBP* and Jumonji family genes; 5) signal transduction pathways such as the JAK-  
116 STAT and NF-κB pathways.

117 We compared gene expression profiles in *P. vitticeps* embryonic gonads at three  
118 developmental stages (6, 12 and 15; 19,20) for ZWf and ZZf eggs incubated at 28°C and 36°C  
119 respectively (Fig. 1). This allowed us to compare drivers of sex determination and  
120 differentiation under genetic or thermal influence. We found that very different regulatory  
121 processes are involved in temperature-driven regulation compared to gene-driven  
122 regulation, although both lead to a conserved outcome (ovaries, Fig. 2). We discovered  
123 dramatic changes in cellular calcium homeostasis in the gonads of ZZf individuals incubated  
124 at high sex reversing temperatures, which fulfill predictions of the CaRe hypothesis that this  
125 is the key driver of temperature induced feminization. We argue that differential expression  
126 of calcium channels, and subsequent alterations of the intracellular environment combined  
127 with increased ROS production encode, then transduce, the thermal signal into altered gene  
128 expression, ultimately triggering male to female sex reversal in *P. vitticeps*.

## 129 **Results**

### 130 **Gene-driven female determination in ZWf embryos**

131 Comparisons between stages in ZWf embryos (Fig. 3B, Fig. S1, Additional file S1) showed  
132 that many genes were differentially expressed between stages 6 and 12 (210 genes  
133 downregulated and 627 genes upregulated at stage 12), but few genes were differentially  
134 expressed between stages 12 and 15 (2 genes upregulated at stage 15).

135 *SOX9* and *GADD45G*, genes strongly associated with male development in mammals,  
136 were downregulated from stage 6 to stage 12, whereas various female related genes were  
137 upregulated, such as *PGR*, *ESR2*, *CYP19A1*, and *CYP17A1*. *BMP7*, a regulator of germ cell  
138 proliferation was upregulated at stage 12 (21), as were components of the NOTCH signalling  
139 pathway (*JAG2*, *DLL3*, *DLL4*), which are required for the suppression of Leydig cell  
140 differentiation (22,23). *SRD5A2*, whose product catalyses the 5- $\alpha$  reduction of steroid  
141 hormones such as testosterone and progesterone, was also upregulated (24,25).

142 Notably, there was little differential expression between stages 12 and 15, suggesting  
143 that genetically driven ovarian development is complete by stage 12 (Additional file S1).

### 144 **Temperature-driven female determination in ZZf embryos**

145 Differential expression analysis of temperature-driven female development in ZZf embryos  
146 revealed many genes are differentially expressed between stages 6 and 12 (297  
147 downregulated and 511 upregulated at stage 12) and no genes are differentially expressed  
148 between stage 12 and 15 (Fig. 3, Fig. S1, Additional file S1), suggesting completion of the  
149 ovarian development by stage 12 also in ZZf females.

150 Upregulation of *FZD1*, a receptor for *Wnt* family proteins required for female  
151 development, suggests the activity of female pathways in ZZf embryos (26). As was seen for  
152 ZWf females, canonical NOTCH ligands *DLL3* and *DLL4* were upregulated from stage 6 to  
153 stage 12 in ZZf females. However, this did not coincide with upregulation of JAG ligands or  
154 NOTCH genes, and the GO term “negative regulation of NOTCH signalling” was enriched  
155 within the group of genes upregulated from stage 6 to 12 in ZZf females (Additional file S2).  
156 Further, *PDGFB*, which is required for Leydig cell differentiation, was upregulated (27).

157 Together, this suggests that the NOTCH signalling pathway may not be activated, and Leydig  
158 cell recruitment is not strongly repressed at stage 12 in ZZf. Alternatively, the absence of  
159 NOTCH signalling may indicate an important transition from progenitor cells to  
160 differentiated gonadal cell types in the early stages of the developing ovary (28). These  
161 apparent differences in NOTCH signalling between ZZf and ZWf embryos suggests that  
162 ovarian development has progressed further in ZWf females.

163 Interestingly, genes typically associated with male development show diverse  
164 regulation in ZZf embryos, with some being downregulated and some being upregulated  
165 from stage 6 to 12. These included *WNT5a* and *SFRP2*, which are both involved in testicular  
166 development in mice (29,30), *NCOA4*, which enhances activity of various hormone  
167 receptors, and exhibits high expression in testes in mice during development (31), and  
168 *HSD17B3*, which catalyses androstenedione to testosterone (32). Unlike what was observed  
169 in ZWf embryos, *SOX9* and *GADD45G* were not differentially expressed between stages 6  
170 and 12 in ZZf embryos. *TGFBR3L*, which is required for Leydig cell function in mouse testis  
171 (33), and *NR5A1*, *SOX4*, and *AMHR2* (34–37) were also differentially expressed between  
172 stages 6 and 12 (Additional file S1).

173 A suite of genes typically associated with female development were upregulated from  
174 stage 6 to 12 (38), for example, *FOXL2*, *CYP17A1*, *RSPO1*, and *ESRRG*. As was also observed  
175 in stage 12 ZWfs, *ESR2*, *BMP7*, *CYP19A1*, and *PGR*, were more highly expressed at stage 12  
176 in ZZfs. Notably, *CYP19A1* was much more strongly upregulated at stage 12 in ZZfs  
177 compared with stage 12 in ZWfs (Additional file S1). The increase in sex specific genes was  
178 also reflected in enriched GO terms at stage 12, which included “hormone binding”, “steroid  
179 hormone receptor activity”, and “female sex determination” (Additional file S2).

### 180 **Ovarian maintenance in sex reversed ZZf females**

181 The maintenance of female gene expression and ovarian development at stage 12 in ZZf  
182 females may be centrally mediated by *STAT4* (Fig. 4). As a member of the *JAK-STAT*  
183 pathway, *STAT4* is transduced by various signals, including reactive oxygen species, to  
184 undergo phosphorylation and translocate from the cytoplasm to nucleus (39–41). At stage  
185 12, *STAT4* is upregulated, alongside *PDGFB* compared to stage 6 in ZZf females. *PDGFB* is  
186 known to activate *STAT4* (40). Various *STAT4* target genes, notably *AMHR2*, *NR5A1*, *EGR1*,

187 and *KDM6B* (40) are also upregulated at stage 12 (Additional file S1). Consistent with this  
188 link is the observation that a member of the same gene family, *STAT3*, is implicated in TSD in  
189 *Trachemys scripta* (17).

190 Several targets of *STAT4* are upregulated at stage 12, including *AMHR2* and *NR5A1*.  
191 Though typically associated with male development, *AMHR2* and *NR5A1* may also have roles  
192 in ovarian development. Although it is the primary receptor for *AMH*, *AMHR2* exhibits  
193 considerable evolutionary flexibility is sometimes associated with ovarian development  
194 (reviewed by (36)). *NR5A1* is also often associated with male development, as it positively  
195 regulates expression of *AMH* and *SOX9* in mammals (42). However, *NR5A1* can also interact  
196 with *FOXL2* and bind to *CYP19A1* promoter to promote female development (43,44). The  
197 upregulation of *FOXL2* and *CYP19A1*, but not *AMH* or *SOX9*, suggests that *NR5A1* is involved  
198 in the establishment of the ovarian pathway in ZZf females.

199 *EGR1* positively regulates *DMRT1* expression through promoter binding in Sertoli cells,  
200 but knock-out of this gene can also cause female infertility in mice (45–47). *EGR1* is also  
201 associated with female development in birds, likely controlling the production of steroid  
202 hormones (34). As was observed for *NR5A1*, *DMRT1* was also lowly expressed, suggesting it  
203 is not activated by *EGR1* in ZZf females.

204 One explanation for these expression trends is that male-associated genes are not  
205 strongly repressed at this stage during the sex reversal process, and that more prolonged  
206 exposure to the sex reversing temperature is required to firmly establish the female  
207 phenotype. However, we argue that the results more strongly suggest ROS-induced  
208 activation of *STAT4*, and subsequent phosphorylation and translocation, probably mediated  
209 by *PDGFB*, allows for the transcriptional activation of *NR5A1*, *AMHR2*, and *EGR1*, which in  
210 the temperature driven process of sex reversal in the ZZf embryos serve to maintain the  
211 ovarian phenotype.

## 212 **Differential regulation of female developmental pathways**

213 To better understand differences in ovarian developmental pathways, we compared gene  
214 expression of ZZf with ZWf embryos at each developmental stage. There are large gene  
215 expression differences between normal ZWf females and ZZf sex reversed females early in

216 development, before the bipotential gonad differentiates into an ovary. These differences  
217 are most pronounced early in development and diminish as development progresses. Stage  
218 6 had the largest number of differentially expressed genes (DEGs) (281 genes higher  
219 expressed in ZWf embryos, 423 genes higher expressed in ZZf), with fewer DEGs at stage 12  
220 (51 genes upregulated in ZWf, 63 genes upregulated in ZZf), and fewest at stage 15 (1 gene  
221 upregulated in ZWf, 2 genes upregulated in ZZf) (Fig. 3B, Additional file S3, Fig. S1). This  
222 suggests that the sex reversed embryos start out on a male developmental trajectory, which  
223 they pursue beyond the thermal cue (3 days when the eggs were switched to high  
224 incubation temperatures, Fig. 1), but by stage 12 development has been taken over by  
225 female genes.

226 Gene ontology (GO) enrichment analysis showed important differences between ZZf and  
227 ZWf at stage 6, and provides independent support for the role of calcium and redox  
228 regulation in ZZf females as proposed by the CaRe model (Fig. 5 A-D, Additional file S4). GO  
229 processes enriched in the gene set higher expressed in ZZf at stage 6 included “oxidation-  
230 reduction processes”, “cytosolic calcium ion transport”, and “cellular homeostasis” (Fig. 5A,  
231 Additional file S4). GO function enrichment also included several terms related to  
232 oxidoreductase activities, as well as “active transmembrane transporter activity” (Fig. 5C,  
233 Additional file S4). No such GO terms were enriched in the gene set higher expressed in  
234 ZWf. Instead, enriched GO terms included “anatomical structure development”, and  
235 “positive regulation of developmental growth” (Fig. 5B, D, Additional file S4).

236 Genes involved in female sex differentiation were higher expressed at stage 6 in normal  
237 ZWf embryos compared to sex reversed ZZf embryos (Additional file S3). These included  
238 *FOXL2*, *ESR2*, *PGR*, and *GATA6* (48,49). Higher expression of *LHX9*, a gene with a role in  
239 bipotential gonad formation in mammals and birds, was more highly expressed in ZWf  
240 embryos (42,50–52). Two genes with well described roles in male development, *SOX4* and  
241 *ALDH1A2* (53–55), were also higher expressed in ZWf embryos, suggesting they have an as  
242 yet unknown function in the early establishment of the ovarian trajectory in *P. vitticeps*.

243 Taken together, these results further suggest that ZWf females are committed to the  
244 female pathway earlier than ZZf females. This is not surprising, since ZWf females possess  
245 sex chromosomes from fertilisation, whereas ZZf individuals have had only 3 days of  
246 exposure to a sex reversal inducing incubation temperature (Fig. 1A). This data is the first to



247 demonstrate a difference in timing of genetic signals between gene and temperature driven  
248 development in the same species.

249 Three genes were constantly differentially expressed between ZWf and ZZf embryos at  
250 all three developmental stages (Fig. 3A). *GCA* (grancalcin) was upregulated in ZWf embryos,  
251 and *KDM6B* and *CIRBP* were upregulated in ZZf embryos at all developmental stages. *GCA* is  
252 a calcium binding protein commonly found in neutrophils and is associated with the Nf- $\kappa$ B  
253 pathway (56,57). It has no known roles in sex determination, but its consistent upregulation  
254 in ZWf embryos compared to ZZf embryos suggests *GCA* is associated with gene driven  
255 ovarian development, at least in *P. vitticeps*.

256 Further analysis of gene expression trends using K-means clustering analysis (58) was  
257 used to investigate genes associated with female development, and to determine to what  
258 extent these genes are shared between ZZf and ZWf embryos (Fig. 6, Additional file S5).  
259 Clusters with upward trends reflect genes likely to be associated with female development,  
260 so clusters 1 and 4 in ZWf (ZWC1 and ZWC4), and clusters 1 and 2 in ZZf (ZCC1 and ZCC2),  
261 were explored in greater detail (Fig. 6, Additional file S5).

262 ZWC4 and ZCC2 shared 374 genes. Enriched GO terms included “germ cell  
263 development” and “reproductive processes” (Additional file S6), consistent with a link with  
264 female development. Genes identified included *FIGLA*, a gene known to regulate oocyte-  
265 specific genes in the female mammalian sex determination pathway (59), and *STRA8* which  
266 controls entry of oocytes into meiosis. Intriguingly, the GO term “spermatid development”  
267 was also enriched, encompassing many genes with known roles in testes function, including  
268 *ADAD1* and *UBE2J1* (60,61). This suggests that genes involved in male sex determination in  
269 mammals may have been co-opted for use in the ovarian pathway in reptiles, so their roles  
270 require further investigation in other vertebrate groups, particularly given the complex  
271 nature of gene expression in sperm cell types.

272 ZWC1 and ZCC1 shared 998 genes. ZCC1 has about 700 unique genes and ZWC1 about  
273 500. GO analysis on shared genes between these clusters (n = 998) revealed enrichment  
274 terms such as “kinase binding” and “intracellular signal transduction” (Additional file S5).  
275 Genes unique to ZCC1 included members of heat shock protein families (*HSPB11*, *HSPA4*,  
276 *HSP90AB1*, *HSPH1*, *HSPB1*, *HSPD1*), heterogenous ribonucleoprotein particles (*HNRNPUL1*),

277 mitogen activated proteins (including *MAPK1*, *MAPK9*, *MAP3K8*), and chromatin  
278 remodelling genes (*KDM2B*, *KDM1A*, *KDM5B*, *KDM3B*). GO enrichment for genes unique to  
279 ZCC1 included “mitochondrion organisation”, “cellular localisation”, and “ion binding”, while  
280 GO enrichment for genes unique to ZWC1 included “regulation of hormone levels” and  
281 numerous signalling related functions (Additional file S6).

282 Taken together, our results show that although the same ovarian phenotype is  
283 produced in genetic and temperature induced females, this end is achieved via different  
284 gene expression networks. This is most pronounced at stage 6, after which the extent of the  
285 differences decreases through development. This reflects canalisation of the gonadal fate to  
286 a shared outcome (ovaries, Fig. 2).

### 287 *Signature of hormonal and cellular stress in ZWf females*

288 Previous work on *P. vitticeps* has shown a more than 50-fold upregulation of a hormonal  
289 stress response gene, *POMC*, in sex reversed adult females, leading to the suggestion that  
290 induction of sex reversal is in response to temperature stress, or that it is an inherently  
291 stressful event, the effects of which persist into adult life (14). We therefore investigated  
292 the expression of stress related genes in ZZf and ZWf embryos.

293 We found considerable evidence that ZZf embryos experience oxidative stress, likely  
294 resulting from increased ROS production (discussed in detail below). However, contrary to  
295 our expectations, we found that ZWf embryos showed higher expression than ZZf of  
296 hormonal stress genes and pathways that have been hypothesized to be involved in sex  
297 reversal (Fig. 5E-F, Additional file S3). Genes upregulated in ZWf embryos compared to ZZf  
298 embryos included *STAT1*, a component of the JAK-STAT pathway, with several roles in stress  
299 responses (62), and *MAP3K1* and *MAPK8*, which are typically involved in mediating stress-  
300 related signal transduction cascades (63–65). *TERF2IP* is also upregulated; this gene is  
301 involved in telomere length maintenance and transcription regulation (66). When  
302 cytoplasmic, *TERF2IP* associates with the I-kappa-B-kinase (IKK) complex and promotes IKK-  
303 mediated phosphorylation of RELA/p65, activating the NF-κB pathway and increasing  
304 expression of its target genes (67). Notably two members of the IKK complex, *IKBKG* (also  
305 known as *NEMO*) and *PRKCI*, which are involved in NF-κB induction, were also upregulated  
306 in ZWf embryos compared to ZZf embryos (Fig. 4b), implying activation of the NF-κB

307 pathway (68). This pathway is typically associated with transducing external environmental  
308 signals to a cellular response (69,70), but also has diverse roles in sex determination in  
309 mammals, fish, and invertebrate models (reviewed by Castelli *et al.*, 2019).

310 *CRH*, another gene upregulated at stage 6 in ZWf females compared with ZZf females  
311 (Fig. 5b, supplementary file S3), is best known for its role as a neuropeptide synthesised in  
312 the brain in response to stresses that trigger the hypothalamic-pituitary-adrenal (HPA) axis  
313 (71,72). The role of *CRH* production in the gonads, particularly in ovaries is currently poorly  
314 understood (73–76). High *CRH* expression in ZWf gonads is the first observation of this in  
315 reptiles. The role of the hormonal stress response during embryonic development, and its  
316 apparent discordance with results observed in adults in *P. vitticeps* requires further  
317 investigation (14).

### 318 **Cellular signalling cascades driving sex reversal**

319 Results of this study provide considerable corroborative support for the CaRe model, which  
320 proposes a central role for calcium and redox in sensing and transducing environmental  
321 signals to determine sex. Many of the genes and pathways predicted by the CaRe model to  
322 be involved in sex reversal were shown to be upregulated in ZZf embryos at stage 6  
323 compared to ZWf embryos. We use the CaRe model as a framework to understand the roles  
324 of each signalling participant in their cellular context during the initiation of sex reversal (Fig.  
325 7). This interpretation is also independently supported by GO analysis, showing enrichment  
326 of expected terms, such as “cytosolic calcium ion transport” (Additional file S4), as well as k-  
327 means clustering analysis (Additional files S4, S5).

328 Cluster 6 in ZZf (Fig. 6A) shows genes whose expression decreases after stage 6, so is likely  
329 to include genes responsible for the initial response to temperature and initiation of sex  
330 reversal, whose continuing action is not required once the ovarian trajectory has been  
331 established. Consistent with this assumption, as well as with predictions from the CaRe  
332 model, the 4050 genes in this cluster were enriched for GO terms that included “oxidation-  
333 reduction process” and various oxidoreductase activities (Additional files S5, S6).

334 *Calcium transport, signalling, and homeostasis*

335 Our data suggest that exposure to high temperatures may cause a rapid increase in cytosolic  
336  $\text{Ca}^{2+}$  concentrations, as calcium influx is probably mediated by the thermosensitive calcium  
337 channel, *TRPV2* (77,78). *TRPV2* was upregulated in stage 6 ZZf embryos compared to ZWf  
338 embryos (Fig. 6). Transient receptor potential (TRP) ion channels, including *TRPV2*, have  
339 previously been implicated in TSD in *Alligator sinensis* and *A. mississippiensis*, as well as the  
340 turtle *Trachemys scripta* (79–82).

341 *TRPV2* mediated  $\text{Ca}^{2+}$  influx may trigger a cascade of changes within the gonadal cells  
342 of ZZf females, which restore calcium homeostasis, critical to avoid apoptosis (83,84). We  
343 observed evidence of such a homeostatic response, with the upregulation of seven genes  
344 involved in  $\text{Ca}^{2+}$  transport and sequestration in ZZf females compared to ZWf females at  
345 stage 6 (Fig. 6). Specifically, *MCU*, *ATP2B1*, *ATP2B4*, together regulate calcium homeostasis  
346 through active transport of calcium into the mitochondria and into the extracellular space  
347 (85–87). *KCNN1* and *CACNB3* encode proteins required for the formation of plasma  
348 membrane channels controlling the passage of  $\text{Ca}^{2+}$  (88–90). *CACNB3* and *KCNN1* have well  
349 characterised roles in the nervous system, and excitable cell types in muscle, but their  
350 association with TSD in embryonic gonads is novel (88,89). Evidence is also building for a  
351 broader role for voltage-gated calcium channels, including *CACNB3*, in orchestrating  $\text{Ca}^{2+}$   
352 signalling and gene regulation (91). We suggest that *KCNN1* and *CACNB3* in gonads of TSD  
353 species play roles in mediating the homeostatic response to elevated cytosolic  $\text{Ca}^{2+}$   
354 concentrations, and are involved in the subsequent modulation of  $\text{Ca}^{2+}$  signalling pathways.

355 *TRPC4*, another TRP family gene was, upregulated in stage 12 compared to stage 6 in  
356 both ZZf and ZWf embryos. *TRPC4* is expressed in mouse sperm and inhibited by  
357 progesterone (92,93) but has no known association with sex determination. *TRPC4* belongs  
358 to the TRPC superfamily, which all conduct calcium ions into the cell, typically through  
359 phospholipase C and calmodulin signalling pathways, G-protein-coupled receptors, and  
360 receptor tyrosine kinases (94,95). Notably, *PLCL2* a phospholipase gene, together with  
361 calmodulin genes *CALM1* and *CAMKK1*, were upregulated alongside *TRPC4* from stage 6 to  
362 stage 12 in ZZf embryos but not in ZWf embryos (Additional file S3). Given *TRPC4* is  
363 upregulated from stage 6 to 12 in both ZZf and ZWf females, it may play a more conserved  
364 role in ovarian development in *P. vitticeps*.

365 Several genes with functions in calcium metabolism were upregulated in stage 6 ZZf  
366 embryos compared to stage 6 ZWf embryos. *CALR* encodes a multifunctional protein that  
367 acts as a calcium binding storage protein in the lumen of the endoplasmic reticulum, so is  
368 also important for regulating  $\text{Ca}^{2+}$  homeostasis (84,96,97). *CALR* is also present in the  
369 nucleus, where it may play a role in regulation of transcription factors, notably by  
370 interacting with DNA-binding domains of glucocorticoid and hormone receptors, inhibiting  
371 the action of androgens and retinoic acid (97–101). *TMEM38B* (commonly known as *TRICB*)  
372 is also found on the endoplasmic and sarcoplasmic reticula, where it is responsible for  
373 regulating the release of  $\text{Ca}^{2+}$  stores in response to changes in intracellular conditions (102).

374 *MCU*, *ATP2B1*, *ATP2B4*, *KCNN1*, *CACNB3*, *CALR*, and *TMEM38B* have no known roles in  
375 vertebrate sex determination, so their association with sex reversal in *P. vitticeps* is new.  
376 This upregulation during the early stage of sex reversal suggests that they are upstream  
377 modulators involved in the transduction of environmental cues that trigger sex  
378 determination cascades, which is consistent with predictions made by the CaRe hypothesis.

379 We hypothesize that intracellular  $\text{Ca}^{2+}$  increases in stage 6 ZZf gonads, and further  
380 observe that  $\text{Ca}^{2+}$  signalling related genes are also upregulated in ZZf females compared to  
381 stage 6 ZWf females (Fig. 7). *C2CD2* and *C2CD2L* are both thought to be involved in  $\text{Ca}^{2+}$   
382 signalling, although there is no functional information about these genes. Of note is the  
383 significant upregulation of *S100Z*, which is a member of a large group of EF-hand  $\text{Ca}^{2+}$   
384 binding proteins that play a role in mediating  $\text{Ca}^{2+}$  signalling (103). The EF-hand domain is  
385 responsible for binding  $\text{Ca}^{2+}$ , allowing proteins like that encoded by *S100Z* to ‘decode’ the  
386  $\text{Ca}^{2+}$  biochemical signal and translate this to various targets involved in many cellular  
387 functions including  $\text{Ca}^{2+}$  buffering, transport, and enzyme activation (104,105). *PLCB1* also  
388 contains an EF-hand binding domain and behaves similarly, being activated by many  
389 extracellular stimuli and effecting numerous signalling cascades. It can translocate to the  
390 plasma membrane and nucleus, and release  $\text{Ca}^{2+}$  from intracellular stores (106). Some  $\text{Ca}^{2+}$   
391 related genes (*GCA* and *CALM1*) are also upregulated in ZWf embryos, but make only a small  
392 proportion of the overall response in differential gene expression (Additional file S3).

393 *Oxidative stress in response to high temperatures*

394 The upregulation of antioxidant genes in ZZf compared to ZWf embryos suggests that the  
395 gonadal cells in the ZZf embryos are in a state of oxidative stress (Fig. 7). As was proposed  
396 by the CaRe model, we see results consistent with the prediction that high incubation  
397 temperatures increase metabolism, which increases the production of reactive oxygen  
398 species (ROS) by the mitochondria, resulting in oxidative stress (13). ROS are required for  
399 proper cellular function, but above an optimal threshold, they can cause cellular damage  
400 (107,108). Crossing this threshold launches the antioxidant response, which causes the  
401 upregulation of antioxidant genes to produce protein products capable of neutralising ROS  
402 (109,110). We observed upregulation of redox related genes, specifically of *TXNDC11*,  
403 *PRDX3*, *MGST1* in ZZf embryos compared to ZWf embryos at stage 6. Also upregulated was  
404 *FOXO3*, which plays a role in oxidative stress responses, typically by mediating pro-apoptotic  
405 cascades (111,112). Importantly, antioxidants play other cellular roles besides neutralisation  
406 of ROS. One of these is the alteration of cysteine residues through a process known as S-  
407 glutathionylation (113).

408 Various redox related genes were downregulated from stage 6 to 12 in ZZf embryos  
409 but not in ZW embryos, including *GLRX* and *PRDX3* (114), as well as numerous genes  
410 involved in ROS induced DNA damage repair; *LIG4*, *ENDOD1*, and *HERC2* (115). This indicates  
411 a need for expression of these genes specifically in ZZf embryos in early stages that ceases in  
412 transition to stage 12. *STAT4*, a member of the ROS-induced JAK-STAT pathway (Simon et al.  
413 1998), and *DDIT4*, which is involved stress responses to DNA damage (116), were both  
414 upregulated from stage 6 to stage 12 in ZZf embryos.

415 The vertebrate antioxidant response is typically initiated by *NRF2*, but we observed no  
416 differential expression of *NRF2*, only upregulation of some of its known targets in ZZf  
417 embryos (117). This may mean that the action of *NRF2* is depends more on its translocation  
418 from the cytoplasm to the nucleus to modulate transcription of target genes, a process that  
419 does not necessarily rely on increased expression of *NRF2* (117). Alternatively, *NRF2*  
420 upregulation may have occurred prior to sampling.

421 Oxidative stress has previously been proposed to have a role in TSD, based on the  
422 upregulation of genes involved in oxidative stress response. One of these genes, *UCP2*, was

423 upregulated at high male producing temperatures in *A. mississippiensis* (82). *UCP2*, and  
424 others genes involved in oxidative stress responses, were also implicated in UV induced  
425 masculinisation in larvae of a thermosensitive fish species (*Chirostoma estor*) (118). Notably,  
426 we found that *UCP2* was upregulated between stages 6 to 12 in ZZf *P. vitticeps* embryos,  
427 suggesting a sustained response to thermal stress in the mitochondria (Additional file S3).

#### 428 *Temperature response and cellular triage*

429 We also observed upregulation of genes involved in response to more generalised  
430 environmental stress in ZZf compared to ZWf embryos, as expected since the embryos  
431 exposed to high temperature were experiencing a state of thermal stress (Fig. 7). Notably,  
432 *CIRBP* a promising candidate for regulation of sex determination under thermal influence, is  
433 approximately 10-fold upregulated in ZZf compared to ZWf (Additional file S3). *CIRBP* has a  
434 highly conserved role in generalised stress responses (119). It has been suggested to be a  
435 putative sex determining gene in the TSD turtle *Chelydra serpentina* (120), and is  
436 differentially expressed at different incubation temperatures in *Alligator sinensis* (81). We  
437 also observed the upregulation of *CLK4* in ZZf compared to ZWf embryos, a gene that has  
438 been recently shown to be inherently thermosensitive, and to regulate splicing of  
439 temperature specific *CIRBP* isoforms (121).

440 We found that *ATF5* is upregulated in ZZf embryos compared to ZWf embryos (Fig. 7).  
441 *ATF5* has diverse roles in stimulating gene expression or repression through binding of DNA  
442 regulatory elements. It is broadly involved in cell specific regulation of proliferation and  
443 differentiation, and may also be critical for activating the mitochondrial unfolded protein  
444 response (122). This gene is induced in response to various external stressors, and is  
445 activated via phosphorylation by eukaryotic translation initiation factors, two of which (*EIF1*  
446 and *EIF4A2*; Zhou et al. 2008) are also upregulated in ZZf embryos compared to ZWf  
447 embryos.

448 Though not well studied in the context of sex determination, heat shock factors and  
449 proteins have been implicated in female sex determination in mammals and fish, and may  
450 also play a conserved role in the ovarian pathway in *P. vitticeps* (79,124–127). Surprisingly,  
451 only one gene associated with canonical heat shock response (*HSP40*, also known as  
452 *DNAJC28*) was differentially expressed following exposure to high temperature in stage 6 ZZf

453 females compared to ZWf embryos (Additional file S3). This could mean either that a heat  
454 shock response occurs prior to sampling, or that *P. vitticeps* uses different mechanisms to  
455 cope with heat shock.

#### 456 *Chromatin remodelling*

457 We observed upregulation of several components of two major chromatin remodelling  
458 complexes, polycomb repressive complexes PRC1 and PRC2, in both the genotype-directed  
459 ZWf and the temperature-directed ZZf female pathways in *P. vitticeps* (Fig. 7). Chromatin  
460 modifier genes *KDM6B* and *JARID2* are involved in regulation of gene expression during  
461 embryonic development and epigenetic modifications in response to environmental  
462 stimulus (128,129). *JARID2* and *KDM6B* were both upregulated in ZZf embryos compared to  
463 ZWf embryos in stages 6 and 12, and *KDM6B* was also upregulated at stage 15. These genes  
464 have recently been implicated in two TSD species (*Alligator mississippiensis*, and *Trachemys  
465 scripta*) and temperature sex reversed adult *Pogona vitticeps* (14,15,79,82).

466 We also found that two other members of the PRC1 complex, *PCGF6* and *PCGF1*, were  
467 upregulated in ZZf embryos at stage 6 compared to ZWf embryos (Fig. 7). *PCGF6* is part of  
468 the non-canonical PRC1 complex (ncPRC1) that mediates histone H2A mono-ubiquitination  
469 at K119 (H2AK119ub) (130,131). *PCGF6* acts a master regulator for maintaining stem cell  
470 identity during embryonic development (132), and is known to bind to promoters of germ  
471 cell genes in developing mice (130). *PCFF1* exhibits similar functions by ensuring the proper  
472 differentiation of embryonic stem cells (133). The ncPRC1 complex also promotes  
473 downstream recruitment of PRC2 and H3K27me3, so that complex synergistic interactions  
474 between PRC1 (both canonical and non-canonical) and PRC2 can occur (134,135).

475 We found that other components of both PRC1 and PRC2 complexes were also  
476 upregulated in ZWf embryos compared to ZZf embryos (Fig. 5a, supplementary file S3). A  
477 member of the canonical PRC1 complex, *PCGF2* (also known as *MEL18*), was upregulated in  
478 ZWf embryos compared to ZZf embryos (134). This gene has previously been implicated in  
479 temperature induced male development in *Dicentrachus labrax* (136), and is required for  
480 coordinating the timing of sexual differential in female primordial germ cells in mammals  
481 (137). *KDM1A*, a histone demethylase that is required for balancing cell differentiation and  
482 self-renewal (138), was upregulated in ZWf embryos compared to ZZf embryos. *CHMP1A*



483 was upregulated in ZWf, and is likely to be involved in chromosome condensation, as well as  
484 targeting PcG proteins to regions with condensed chromatin (139).

485 Thus, we conclude that the initiation of sex reversal in ZZf *P. vitticeps* involves a  
486 complex cascade of cellular changes initiated by temperature. Our data are consistent with  
487 the predictions of the CaRe hypothesis that high temperatures are sensed by the cell via TRP  
488 channels, which causes an increase in intracellular increase of Ca<sup>2+</sup>. Coincident with this is an  
489 increase of ROS production in the mitochondria that causes a state of oxidative stress.  
490 Together, Ca<sup>2+</sup> and ROS alter the CaRe status of the cell, trigger a suite of alternations in  
491 gene expression including chromatin remodelling, which drives sex reversal (Fig. 7).

## 492 Discussion

493 We used the unique sex characteristics of our model reptile species, *Pogona vitticeps*,  
494 which determines sex genetically but sex reverses at high temperature, to assess predictions  
495 of the CaRe hypothesis (13). By sequencing isolated embryonic gonads, we provide the first  
496 data to represent a suite of key developmental stages with comparable tissue types, and will  
497 be a valuable resource for this reptilian model system. There are few transcriptomes of GSD  
498 reptiles during embryonic development; the only dataset available prior to this study was a  
499 preliminary study of the spiny softshell turtle, *Apalone spinifera* (126), which was  
500 inadequate for the inter-stage comparisons required to explore genetic drivers of gonad  
501 differentiation.

502 Our analysis of expression data during embryogenesis of normal ZWf females and  
503 temperature sex reversed ZZf females revealed for the first time differences in gene-driven  
504 and temperature-driven female development in a single species. Early in development, prior  
505 to gonad differentiation, the initiation of the sex reversal trajectory differs from the genetic  
506 female pathway both in the timing and genes involved. As development proceeds,  
507 differences in expression patterns become less until the pathways converge on a conserved  
508 developmental outcome (ovaries). Our ability to compare two female types in *P. vitticeps*  
509 allowed us to avoid previously intractable confounding factors such as sex or species-  
510 specific differences, which provided unprecedented insight into parallel female pathways.  
511 We have provided new insight to the conserved evolutionary origins of the labile networks  
512 governing environmentally sensitive sex determination pathways. We have identified a suite

513 of candidate genes, which now provide the necessary foundation for functional experiments  
514 in the future. This could include pharmacological manipulation of calcium signalling through  
515 alteration of intracellular calcium flux and concentration, such as interference with the  
516 TRPV4 channel, or via use of calcium chelators and ionophores, in an organ culture system  
517 (17,80). Ongoing development of resources for *P. vitticeps* as an emerging model organism  
518 may also allow for RNA interference or gene editing experiments, whereby knock-down or  
519 knock-out of candidate genes like *CIRBP*, *JARID2*, and *KDM6B*, could be used to demonstrate  
520 their roles in sex reversal (15).

521 The maintenance of ovarian differentiation seems to require the operation of  
522 different pathways in gene and temperature driven female development. This may involve a  
523 pathway centrally mediated by *STAT4* in sex reversed *P. vitticeps*, which has not been  
524 previously described, so requires additional confirmation with functional experiments. It will  
525 be interesting to determine if a role for these genes occurs in other species. Another STAT  
526 family gene, *STAT3*, has recently been demonstrated to play a critical role in the  
527 phosphorylation of *KDM6B* and subsequent demethylation of the *DMRT1* promoter  
528 required for male development in *T. scripta* (17). The involvement of different genes in the  
529 same family is intriguing in its implications; while different genes may be co-opted, natural  
530 selection may favour gene families with conserved functions even between evolutionarily  
531 disparate lineages.

532 Our data provided insight into the molecular landscape of the cell required to initiate  
533 temperature induced sex reversal. This is the first dataset to capture temperature-induced  
534 sex reversal in a reptile, and remarkably we have simultaneously implicated all functional  
535 candidates that have previously been identified to be involved in TSD across a range of  
536 other species (Table 1). Our results also identified novel genes involved with  
537 thermosensitive sex determination, and provide corroborative evidence for the CaRe  
538 hypothesis (13). Importantly, our work highlights avenues for future studies to conduct  
539 functional experiments to definitively identify the genes and pathways implicated here in  
540 sex reversal. Observation and manipulation of intracellular calcium concentrations, as has  
541 been conducted in *T. scripta* (17), will also be crucial for fully understanding the role of  
542 calcium signalling in sex reversal.

543 Our results highlight the complexity of initiating thermolabile systems. Indeed, it has  
544 been suggested that thermolabile sex determination involves system-wide displacement of  
545 gene regulation with multiple genes and gene products responding to temperature leading  
546 to the production of one sex or the other – a parliamentary system of sex determination  
547 (151). We take an intermediate position, arguing for a central role for Calcium-Redox  
548 balance as the proximal cellular sensor for temperature, but interacting with other required  
549 thermosensitive genes or gene products (e.g. *CLK4*) to influence ubiquitous signalling  
550 pathways and downstream splicing regulation, epigenetic modification and sex gene  
551 expression. The level of interaction between each thermosensitive element remains to be  
552 explored. For example, if temperature can be sensed by both *TRPV2* and *CLK4*, are both  
553 required to initiate sex reversal, or is the signal from only one sufficient? This raises the  
554 possibility that no single proximal sensor of the environmental exists, but that several  
555 thermosensitive elements early in development must come together to orchestrate  
556 alterations in gene expression.

557 It has been suggested that the products of TRP family genes act as mediators between  
558 the temperature signal and a cellular response through  $Ca^{2+}$  signalling and subsequent  
559 modulation of downstream gene targets (80–82). Notably, different TRP channels are  
560 implicated in two alligator species; *TRVP4* in *A. mississippiensis*, but *TRPV2*, *TRPC6*, and  
561 *TRPM6* in *A. sinsensis*. In *T. scripta*, *TRPC3* and *TRPV6* are upregulated at male producing  
562 temperatures (26°C), while *TRPM4* and *TRPV2* are upregulated at female producing  
563 temperatures (31°C), as is the case for *TRPV2* in *P. vitticeps* (79). The diversity of TRP  
564 channels recruited for roles in environmental sex determination hints at considerable  
565 evolutionary flexibility, perhaps the result of repeated and independent co-option of these  
566 channels in TSD species. As may be the case for STAT family genes, the evolution of  
567 environmentally sensitive sex determination pathways may involve the use of different  
568 genes within gene families that have conserved functions.

569 Our data also highlights the importance of chromatin remodelling genes in sex  
570 reversal in *P. vitticeps*. *KDM6B* and *JARID2* have been previously implicated sex  
571 differentiation in adult *P. vitticeps* (14), embryonic *T. scripta* (15,17) and embryonic *A.*  
572 *mississippiensis* (14). Sex-specific intron retention was observed in TSD alligators and turtle,  
573 and was exclusively associated with sex reversal in adult *P. vitticeps* (14). Subsequently,

574 knockdown of *KDM6B* in *T. scripta* caused male to female sex reversal by removing  
575 methylation marks on the promoter of *DMRT1*, a gene critical in the male sex  
576 determination pathway (15). *KDM6B* and *JARID2* have also been associated with TSD in  
577 another turtle species (*Chrysemys picta*) (126), female to male sex change in the bluehead  
578 wrasse, *Thalassoma bifasciatum* (140), and thermal responses in the European bass,  
579 *Dicentrarchus labrax* (141).

580 It is currently unknown if the unique splicing events in *KDM6B* and *JARID2* in adult sex  
581 reversed *P. vitticeps* that cause intron retention and presumed gene inactivation, also occur  
582 in embryos. Given the high expression of these genes during embryonic development at sex  
583 reversing temperatures, it would be surprising if this pattern was observed. We also show a  
584 significant role for *CIRBP* as the only other gene, alongside *KDM6B*, to be consistently  
585 upregulated during sex reversal in all developmental stages assessed. *CIRBP* is a mRNA  
586 chaperone, which could be required to stabilise transcripts of crucial sex specific genes  
587 during oxidative, cellular and/or thermal stress. It has been proposed as a novel TSD  
588 candidate gene in the turtle, *Chelydra serpentina* (120). This gene remains a promising  
589 candidate for mediating thermosensitive responses in TSD more broadly, and its role needs  
590 to be explored in more detail.

## 591 **Conclusions**

592 The alternative female pathways in *P. vitticeps* demonstrates that there is inherent flexibility  
593 in sex determination cascades even within the same species. This is consistent with the idea  
594 that, provided a functional gonad is produced, considerable variation in sex determining and  
595 differentiation processes at the early stages of development is tolerated under natural  
596 selection (151). Perhaps this makes the astonishing variability in sex determination between  
597 diverse species less surprising. Our findings provide novel insights, and are a critical  
598 foundation for future studies of the mechanisms by which temperature determines sex.

## 599 **Materials and Methods**

### 600 *Animal breeding and egg incubations*

601 Eggs were obtained during the 2017-18 breeding season from the research breeding colony  
602 at the University of Canberra. Breeding groups comprised three sex reversed females (ZZf)

603 to one male (ZZ), and three concordant females (ZWf) to two males (Fig. 1). Paternity was  
604 confirmed by SNP genotyping (Fig. S2). Females were allowed to lay naturally, and eggs  
605 were collected at lay or within two hours of lay. Eggs were inspected for viability as  
606 indicated by presence of vasculature in the egg, and viable eggs were incubated in  
607 temperature-controlled incubators ( $\pm 1^\circ\text{C}$ ) on damp vermiculite (4 parts water to 5 parts  
608 vermiculate by weight). Clutches from sex reversed females (that is, ZZf x ZZm crosses)  
609 comprised eggs with only ZZ genotypes. These were initially incubated at  $28^\circ\text{C}$  (male  
610 producing temperature, MPT) to entrain and synchronise development. After 10 d of  
611 incubation, half of the eggs selected at random from each clutch was shifted to  $36^\circ\text{C}$  (female  
612 producing temperature, FPT). Clutches from ZWf x ZZm crosses were incubated at  $28^\circ\text{C}$   
613 throughout the incubation period (Fig. 1A). Sample sizes are given in Fig. 1 and Additional  
614 file S7.

#### 615 *Embryo sampling and genotyping*

616 Eggs from both temperatures were sampled at times corresponding to three developmental  
617 stages (6, 12 and 15) (20), taking into account the differing developmental rates between  
618  $28^\circ\text{C}$  and  $36^\circ\text{C}$ . These stages equate to the bipotential gonad, recently differentiated gonad,  
619 and differentiated gonad respectively (19). Embryos were euthanized by intracranial  
620 injection of 0.1 ml sodium pentobarbitone (60mg/ml in isotonic saline). Individual gonads  
621 were dissected from the mesonephros under a dissection microscope and snap frozen in  
622 liquid nitrogen. Isolation of the gonad from the surrounding mesonephros was considered  
623 essential for studying transcriptional profiles within the gonad. Embryos from three  
624 different ZZf x ZZm clutches from each treatment class (temperature x stage) were selected  
625 for sequencing, and randomized across sequence runs to avoid batch effects. Embryos from  
626 concordant ZWf x ZZm crosses potentially yield both ZW and ZZ eggs, so these were  
627 genotyped using previously established protocols (8,20). Briefly, this involved obtaining a  
628 blood sample from the vasculature on the inside of the eggshell on a FTA Elute micro card  
629 (Whatman). DNA was extracted from the card following the manufacturer protocols, and  
630 PCR was used to amplify a W specific region (8) so allowing the identification of ZW and ZZ  
631 samples.

632 *RNA extraction and sequencing*

633 RNA from isolated gonad samples was extracted in randomized batches using the Qiagen  
634 RNeasy Micro Kit (Cat. No. 74004) according to the manufacturer protocols. RNA was eluted  
635 in 14 µl of RNAase free water and frozen at -80°C prior to sequencing. Sequencing libraries  
636 were prepared in randomized batches using 50 ng RNA input and the Roche NimbleGen  
637 KAPA Stranded mRNA-Seq Kit (Cat. No. KK8420). Nine randomly selected samples were  
638 sequenced per lane using the Illumina HiSeq 2500 system, and 25 million read-pairs per  
639 sample were obtained on average. Read lengths of 2 x 150 bp were used. All samples were  
640 sequenced at the Kinghorn Centre for Clinical Genomics (Garvan Institute of Medical  
641 Research, Sydney). All sample RNA and library DNA was quantified using a Qubit Instrument  
642 (ThermoFisher Scientific, Scoresby, Australia), with fragment size and quality assessed using  
643 a Bioanalyzer (Agilent Technologies, Mulgrave, Australia).

644 *Gene expression profiling*

645 Paired-end RNA-seq libraries (.fastq format) were trimmed using trim\_galore with default  
646 parameters (v0.4.1; [https://www.bioinformatics.babraham.ac.uk/projects/trim\\_galore/](https://www.bioinformatics.babraham.ac.uk/projects/trim_galore/), last  
647 access 21-Apr-2020). Trimmed reads were aligned to the *Pogona vitticeps* NCBI reference  
648 genome (pvi1.1, GenBank GCA\_900067755.1; (142)) using STAR (v2.5.3; (143)), with splice-  
649 aware alignment guided by the accompanying NCBI gene (*Pvi1.1*) annotation (.gtf format).  
650 Likely PCR duplicates and non-unique alignments were removed using samtools (v1.5 ;  
651 (144)). Gene expression counts and normalised expression values (reported in TPM) were  
652 determined using RSEM (rsem-calculate-expression; v1.3.1; (145)).

653 *Identification of non-sex reversed specimens*

654 Normalised transcripts per million (TPM) for a panel of sex-specific genes (*SOX9*, *AMH*,  
655 *DMRT1*, *FOXL2*, *CYP19A1*, *CYP17A1*) were inspected across the three stages to identify if any  
656 samples showed aberrant expression patterns. This approach was also used to determine if  
657 any of the stage 12 and 15 samples from the 36°C treatment had not undergone sex  
658 reversal by comparing expression levels between ZWf and ZZf embryos; the rate of sex  
659 reversal is 96% at 36°C (8) (Fig. S3, Additional file S8). The five samples from clutch 9  
660 exhibited significantly higher expression values for *SOX9*, *AMH*, and *DMRT1* and represented  
661 clear outliers. This was also supported by multidimensional scaling (MDS) plots, so the

662 decision was made to regard the five samples from clutch 9 as aberrant and exclude them  
663 from subsequent analyses (Figs S3, S4, Additional file S9). Any ZZf samples with male-like  
664 gene expression patterns (high expression for male-specific genes, and low expression for  
665 female-specific genes) were considered to have not been reversed (sex reversal is not 100%  
666 at 36°C) and were removed (two stage 15 samples).

#### 667 *Differential expression analysis*

668 Differential expression analysis of ZZf and ZWf transcripts was conducted on raw counts  
669 using the EdgeR package (Bioconductor v 3.9 (146)) in R (v 1.2.1335, (147)), following  
670 standard procedures outlined in the EdgeR users guide (146,148). Lowly expressed genes,  
671 which was applied to genes with fewer than ten counts across three samples, were removed  
672 from the raw counts (19,285 genes) so that the total number of genes retained was 17,075.  
673 Following conversion to a DGElist object in EdgeR, raw counts were normalised using the  
674 upper-quartile method (calcNormFactors function) (149). Estimates for common negative  
675 binomial dispersion parameters were generated (estimateGLMCommonDisp function) (148),  
676 followed by generation of empirical Bayes dispersion estimates for each gene  
677 (estimateGLMTagwiseDisp function) (148,150). A quasi-likelihood binomial generalised log-  
678 linear model was fitted (glmQLFit function) and the glmQLTest function was used to  
679 compare contrasts within the design matrix (151–155). A P-value cut-off of 0.01 and a log<sub>2</sub>-  
680 fold change threshold of 1 or -1 was applied to all contrasts (topTags function) (151).  
681 Contrasts were used to assess differential expression between ZZf and ZWf samples across  
682 each developmental stage. Raw count (Additional file S10) and expression files (Additional  
683 file S11) from this analysis are supplied.

684 Gene ontology (GO) analysis was conducted for each set of differentially expressed  
685 genes using GOrilla (156,157). The filtered count data file (17,075 genes) was used for the  
686 background gene set at a P-value threshold of 10<sup>-3</sup>.

#### 687 *K-means clustering analysis*

688 K-means clustering analysis was performed on normalised counts per million extracted from  
689 the DGElist object produced by the initial process of the DGE analysis using edgeR (see  
690 above). Counts for each gene were averaged for each treatment group, and the number of  
691 clusters was selected using the sum of squared error approach, which was further validated

692 by checking that each cluster centroid was poorly correlated with all other cluster centroids  
693 (maximum correlation 0.703 in ZWf clusters, and 0.65 in ZZf clusters). A total of 6 clusters  
694 was chosen, and clustering analysis was conducted using the kmeans function in R package  
695 stats v3.6.2. Resultant gene lists were sorted by unique and shared genes between clusters  
696 with similar trends between ZWf and ZZf (cluster 1 in ZWf, cluster 3 in ZZf, and cluster 3 in  
697 ZWf and cluster 5 in ZZf). Both unique and shared genes from each cluster and pairs of  
698 clusters (cluster 1 and 3, and clusters 3 and 5) were then analysed for gene ontology (GO)  
699 enrichment using GOrilla (156,157). The filtered count data file (17,075 genes) was used for  
700 the background gene set at a P-value threshold of  $10^{-3}$ .

## 701 **Declarations**

### 702 *Ethics Approval*

703 All procedures were conducted in accordance with approved animal ethics protocols from  
704 the University of Canberra Animal Ethics Committee (AEC 17-17).

### 705 *Consent for publication*

706 Not applicable

### 707 *Availability of data and materials*

708 The raw input files (counts and transcripts per million) that were analysed for this study are  
709 available as supplementary files. Raw sequencing data is available under NCBI BioProject  
710 PRJNA699086 (Biosample accession IDs SAMN17765903 to SAMN17765941).

### 711 *Competing interests*

712 The authors declare that they have no competing interests.

### 713 *Funding*

714 This work was supported by a Discovery Grant from the Australian Research Council  
715 (DP170101147) awarded to AG (lead), CEH, JD, JMG, Tariq Ezaz, Stephen Sarre, Lisa Schwanz  
716 and Paul Waters. SLW was supported by a CSIRO Research Plus Postgraduate Award and a  
717 Research Training Scholarship.



718 *Author Contributions*

719 AG and CEH led and designed the experiment, AG and JMG built the “Sex in Dragons”  
720 program of which this is a part. SLW carried out all experimental procedures and differential  
721 gene expression analysis. JB created all RNA libraries and carried out all sequencing. IWD  
722 generated all data files from sequencing outputs. SW assisted with data analysis, particularly  
723 K-means clustering. SLW lead the preparation of the manuscript, with AG, CEH, and JMG. All  
724 authors provided feedback on the manuscript and approved the final draft.

725 *Acknowledgements*

726 We thank Dr Wendy Ruscoe and Jacqui Richardson at the University of Canberra Animal  
727 House Facility for their animal husbandry expertise.

728 **References**

- 729 1. Koopman P, Gubbay J, Vivian N, Goodfellow P, Lovell-Badge R. Male development of  
730 chromosomally female mice transgenic for *Sry*. *Nature*. 1991;351:117–21.
- 731 2. Sinclair AH, Berta P, Palmer MS, Hawkins JR, Griffiths BL, Smith MJ, et al. A gene from the  
732 human sex-determining region encodes a protein with homology to a conserved DNA-binding motif.  
733 *Nature*. 1990;346:240–4.
- 734 3. Smith CA, Roeszler KN, Ohnesorg T, Cummins DM, Farlie PG, Doran TJ, et al. The avian Z-  
735 linked gene DMRT1 is required for male sex determination in the chicken. *Nature*. 2009;461:267–71.
- 736 4. Barske LA, Capel B. Blurring the edges in vertebrate sex determination. *Curr Opin Genet Dev*.  
737 2008;18:499–505
- 738 5. Capel B. Vertebrate sex determination: evolutionary plasticity of a fundamental switch. *Nat*  
739 *Rev Genet*. 2017;18:675–89.
- 740 6. Sarre SD, Georges A, Quinn A. The ends of a continuum: Genetic and temperature-  
741 dependent sex determination in reptiles. *BioEssays*. 2004;26:639–45.
- 742 7. Holleley CE, Sarre SD, O’Meally D, Georges A. Sex reversal in reptiles: Reproductive oddity or  
743 powerful driver of evolutionary change? *Sex Dev*. 2016;10:279–87.
- 744 8. Holleley CE, O’Meally D, Sarre SD, Graves J, Ezaz T, Matsubara K, et al. Sex reversal triggers  
745 the rapid transition from genetic to temperature-dependent sex. *Nature*. 2015;523:79–82.
- 746 9. Radder RS, Quinn AE, Georges A, Sarre SD, Shine R, Quinn AE, et al. Genetic evidence for co-  
747 occurrence of chromosomal and thermal sex-determining systems in a lizard. *Biol Lett*. 2008;4:176–  
748 8.
- 749 10. Bachtrog D, Mank JE, Peichel CL, Kirkpatrick M, Otto SP, Ashman T-L, et al. Sex  
750 Determination: Why So Many Ways of Doing It? *PLOS Biol*. 2014;12:e1001899.

- 751 11. Herpin A, Schartl M. Plasticity of gene-regulatory networks controlling sex determination: Of  
752 masters, slaves, usual suspects, newcomers, and usurpators. *EMBO Rep.* 2015;16:1260–74.
- 753 12. Singh SK, Das D, Rhen T. Embryonic temperature programs phenotype in reptiles. *Front*  
754 *Physiol.* 2020; doi: 10.3389/fphys.2020.00035.
- 755 13. Castelli M, Whiteley S, Georges A, Holleley C. Cellular calcium and redox regulation: The  
756 mediator of vertebrate environmental sex determination? *Biol Rev.* 2020;95:680–95.
- 757 14. Deveson IW, Holleley CE, Blackburn J, Marshall Graves JA, Mattick JS, Waters PD, et al.  
758 Differential intron retention in Jumonji chromatin modifier genes is implicated in reptile  
759 temperature-dependent sex determination. *Sci Adv.* 2017;3:e1700731.
- 760 15. Ge C, Ye J, Weber C, Sun W, Zhang H, Zhou Y, et al. The histone demethylase KDM6B  
761 regulates temperature-dependent sex determination in a turtle species. *Science.* 2018;360:645–8.
- 762 16. Georges A, Holleley CE. How does temperature determine sex? *Science.* 2018;360:601–2.
- 763 17. Weber C, Zhou Y, Lee J, Looger L, Qian G, Ge C, et al. Temperature-dependent sex  
764 determination is mediated by pSTAT3 repression of *Kdm6b*. *Science.* 2020;3:303–6.
- 765 18. Quinn AE, Georges A, Sarre SD, Guarino F, Ezaz T, Graves JAM. Temperature sex reversal  
766 implies sex gene dosage in a reptile. *Science.* 2007;316:411.
- 767 19. Whiteley SL, Weisbecker V, Georges A, Gauthier ARG, Whitehead DL, Holleley CE.  
768 Developmental asynchrony and antagonism of sex determination pathways in a lizard with  
769 temperature-induced sex reversal. *Sci Rep.* 2018;8:1–9.
- 770 20. Whiteley SL, Holleley CE, Ruscoe WA, Castelli M, Whitehead DL, Lei J, et al. Sex  
771 determination mode does not affect body or genital development of the central bearded dragon  
772 (*Pogona vitticeps*). *Evodevo.* 2017; doi.org/10.1186.
- 773 21. Ross A, Munger S, Capel B. *Bmp7* regulates germ cell proliferation in mouse fetal gonads. *Sex*  
774 *Dev.* 2007;1:127–37.
- 775 22. Windley SP, Wilhelm D. Signaling pathways involved in mammalian sex determination and  
776 gonad development. *Sex Dev.* 2016;9:297–315.
- 777 23. Tang H, Brennan J, Karl J, Hamada Y, Raetzman L, Capel B. Notch signaling maintains Leydig  
778 progenitor cells in the mouse testis. *Development.* 2008;135:3745–53.
- 779 24. Krone N, Hanley NA, Arlt W. Age-specific changes in sex steroid biosynthesis and sex  
780 development. *Best Pract Res Clin Endocrinol Metab.* 2007;21:393–401.
- 781 25. Russell DW, Wilson JD. Steroid 5 $\alpha$ -reductase $\beta$ : Two genes/two enzymes. *Annu Rev*  
782 *Biochem.* 1994;63:25–61.
- 783 26. Eid W, Opitz L, Biason-Lauber A. Genome-wide identification of CBX2 targets: Insights in the  
784 human sex development network. *Mol Endocrinol.* 2015;29:247–57.
- 785 27. Gnessi L, Basciani S, Mariani S, Arizzi M, Spera G, Wang C, et al. Leydig cell loss and  
786 spermatogenic arrest in platelet-derived growth factor (PDGF)-A-deficient mice. *J Cell Biol.*  
787 2000;149:1019–25.

- 788 28. Schmahl J, Rizzolo K, Soriano P. The PDGF signaling pathway controls multiple steroid-  
789 producing lineages. *Genes Dev.* 2008;22:3255–67.
- 790 29. Chawengsaksophak K, Svingen T, Ng ET, Epp T, Spiller CM, Clark C, et al. Loss of *Wnt5a*  
791 disrupts primordial germ cell migration and male sexual development in mice. *Biol Reprod.*  
792 2011;86:1–12.
- 793 30. Warr N, Siggers P, Bogani D, Brixey R, Pastorelli L, Yates L, et al. *Sfrp1* and *Sfrp2* are required  
794 for normal male sexual development in mice. *Dev Biol.* 2009;326:273–84.
- 795 31. Kollara A, Brown TJ. Variable expression of nuclear receptor coactivator 4 (*NcoA4*) during  
796 mouse embryonic development. *J Histochem Cytochem.* 2010;58:595–609.
- 797 32. Padua MB, Jiang T, Morse DA, Fox SC, Hatch HM, Tevosian SG. Combined loss of the *GATA4*  
798 and *GATA6* transcription factors in male mice disrupts testicular development and confers adrenal-  
799 like function in the testes. *Endocrinology.* 2015;156:1873–86.
- 800 33. Sarraj M, Chua HK, Umbers A, Loveland K, Findlay J, Stenvers KL. Differential expression of  
801 *TGFBR3* (betaglycan) in mouse ovary and testis during gonadogenesis. *Growth Factors.* 2007;25:334–  
802 45.
- 803 34. Carré GA, Couty I, Hennequet-Antier C, Govoroun MS. Gene expression profiling reveals new  
804 potential players of gonad differentiation in the chicken embryo. *PLoS One.* 2011;6:1–12.
- 805 35. Zhao L, Arsenault M, Ng ET, Longmuss E, Chau TCY, Hartwig S, et al. *SOX4* regulates gonad  
806 morphogenesis and promotes male germ cell differentiation in mice. *Dev Biol.* 2017;423:46–56.
- 807 36. Adolfi MC, Nakajima RT, N RH, Schartl M. Intersex, hermaphroditism, and gonadal plasticity  
808 in vertebrates: Evolution of the Mullerian duct and *Amh/Amhr2* signaling. *Annu Rev Anim Biosci.*  
809 2019;7:149–72.
- 810 37. Sekido R, Lovell-Badge R. Sex determination involves synergistic action of SRY and SF1 on a  
811 specific *Sox9* enhancer. *Nature.* 2008;453:930–4.
- 812 38. Rhen T, Schroeder A. Molecular mechanisms of sex determination in reptiles. *Sex Dev.*  
813 2010;4:16–28.
- 814 39. Simon AR, Rai U, Fanburg BL, Cochran BH. Activation of the JAK-STAT pathway by reactive  
815 oxygen species. *Am J Physiol Physiol.* 1998;275:C1640–52.
- 816 40. Good SR, Thieu VT, Mathur AN, Yu Q, Stritesky GL, Yeh N, et al. Temporal induction pattern  
817 of STAT4 target genes defines potential for Th1 lineage-specific programming. *J Immunol.*  
818 2009;183:3839–47.
- 819 41. Rawlings JS, Rosler KM, Harrison DA. The JAK/STAT signaling pathway. *J Cell Sci.*  
820 2004;117:1281–3.
- 821 42. Eggers S, Ohnesorg T, Sinclair A. Genetic regulation of mammalian gonad development. *Nat*  
822 *Rev Endocrinol.* 2014;10:673–83.
- 823 43. Wang DS, Kobayashi T, Zhou LY, Paul-Prasanth B, Ijiri S, Sakai F, et al. *Foxl2* up-regulates  
824 aromatase gene transcription in a female-specific manner by binding to the promoter as well as  
825 interacting with *Ad4* binding protein/steroidogenic factor. *Mol Endocrinol.* 2007;21:712–25.

- 826 44. Park M, Shin E, Won M, Kim JH, Go H, Kim HL, et al. *FOXL2* interacts with steroidogenic  
827 factor-1 (*SF-1*) and represses SF-1-induced *CYP17* transcription in granulosa cells. *Mol Endocrinol.*  
828 2010;24:1024–36.
- 829 45. Lei N, Heckert LL. *Sp1* and *Egr1* Regulate Transcription of the *Dmrt1* Gene in Sertoli Cells. *Biol*  
830 *Reprod.* 2002;66:675–84.
- 831 46. Topilko P, Schneider-Maunoury S, Levi G, Trembleau A, Gourdji D, Driancourt MA, et al.  
832 Multiple pituitary and ovarian defects in *Krox-24* (*NGFI-A*, *Egr-1*)-targeted mice. *Mol Endocrinol.*  
833 1998;12:107–22.
- 834 47. Lee SL, Sadovsky Y, Swirnoff AH, Polish JA. Luteinizing hormone deficiency and female  
835 infertility in mice lacking. *Science.* 1996;273:1219–21.
- 836 48. Cutting A, Chue J, Smith CA. Just how conserved is vertebrate sex determination? *Dev Dyn.*  
837 2013;242:380–7.
- 838 49. Lydon JP, DeMayo FJ, Funk CR, Mani SK, Hughes AR, Montgomery CA, et al. Mice lacking  
839 progesterone receptor exhibit pleiotropic reproductive abnormalities. *Genes Dev.* 1995;9:2266–78.
- 840 50. Birk OS, Casiano DE, Wassif CA, Cogliati T, Zhao L, Zhao Y, et al. The LIM homeobox gene  
841 *Lhx9* is essential for mouse gonad formation. *Nature.* 2000;403:909–13.
- 842 51. Oréal E, Mazaud S, Picard JY, Magre S, Carré-Eusébe D. Different patterns of anti-Müllerian  
843 hormone expression, as related to *DMRT1*, *SF-1*, *WT1*, *GATA-4*, *Wnt-4*, and *Lhx9* expression, in the  
844 chick differentiating gonads. *Dev Dyn.* 2002;225:221–32.
- 845 52. Wilhelm D, Englert C. The Wilms tumor suppressor *WT1* regulates early gonad development  
846 by activation of *Sf1*. *Genes Dev.* 2002;16:1839–51.
- 847 53. Duester G. Families of retinoid dehydrogenases regulating vitamin A function: Production of  
848 visual pigment and retinoic acid. *Eur J Biochem.* 2000;267:4315–24.
- 849 54. Bowles J, Knight D, Smith C, Wilhelm D, Richman J, Mamiya S, et al. Retinoid signaling  
850 determines germ cell fate in mice. *Science.* 2006;312:596–9.
- 851 55. Koubova J, Menke DB, Zhou Q, Cape B, Griswold MD, Page DC. Retinoic acid regulates sex-  
852 specific timing of meiotic initiation in mice. *Proc Natl Acad Sci.* 2006;103:2474–9.
- 853 56. Roes J, Choi BK, Power D, Xu P, Segal AW. Granulocyte function in grancalcin-deficient mice.  
854 *Mol Cell Biol.* 2003;23:826–30.
- 855 57. Maki M, Kitaura Y, Satoh H, Ohkouchi S, Shibata H. Structures, functions and molecular  
856 evolution of the penta-EF-hand  $Ca^{2+}$ -binding proteins. *Biochim Biophys Acta - Proteins Proteomics.*  
857 2002;1600(1–2):51–60.
- 858 58. Lloyd S. Least squares quantization in PCM. *IEEE Trans Inf Theory.* 1982;28:129–37.
- 859 59. Nef S, Schaad O, Stallings NR, Cederroth CR, Pitetti JL, Schaer G, et al. Gene expression  
860 during sex determination reveals a robust female genetic program at the onset of ovarian  
861 development. *Dev Biol.* 2005;287:361–77.
- 862 60. Greenlee AR, Shiao MS, Snyder E, Buaas FW, Gu T, Stearns TM, et al. Deregulated sex  
863 chromosome gene expression with male germ cell-specific loss of *Dicer1*. *PLoS One.* 2012;7:1–13.

- 864 61. Koenig PA, Nicholls PK, Schmidt FI, Hagiwara M, Maruyama T, Frydman GH, et al. The E2  
865 ubiquitin-conjugating enzyme *UBE2J1* is required for spermiogenesis in mice. *J Biol Chem.*  
866 2014;289:34490–502.
- 867 62. La Fortezza M, Schenk M, Cosolo A, Kolybaba A, Grass I, Classen AK. JAK/STAT signalling  
868 mediates cell survival in response to tissue stress. *Dev.* 2016;143:2907–19.
- 869 63. Paul A, Wilson S, Belham CM, Robinson CJM, Scott PH, Gould GW, et al. Stress-activated  
870 protein kinases: Activation, regulation and function. *Cell Signal.* 1997;9:403–10.
- 871 64. Davis RJ. Signal transduction by the JNK group of MAP kinases. *Cell.* 2000;103:239–52.
- 872 65. Wang X, Martindale JL, Liu Y, Holbrook NJ. The cellular response to oxidative stress:  
873 influences of mitogen-activated protein kinase signalling pathways on cell survival. *Biochem J.*  
874 1998;333:291–300.
- 875 66. Martinez P, Thanasoula M, Carlos AR, Gómez-López G, Tejera AM, Schoeftner S, et al.  
876 Mammalian *Rap1* controls telomere function and gene expression through binding to telomeric and  
877 extratelomeric sites. *Nat Cell Biol.* 2010;12:768–80.
- 878 67. Teo H, Ghosh S, Luesch H, Ghosh A, Wong ET, Malik N, et al. Telomere-independent *Rap1* is  
879 an IKK adaptor and regulates NF- $\kappa$ B-dependent gene expression. *Nat Cell Biol.* 2010;12:758–67.
- 880 68. Gilmore TD. Introduction to NF- $\kappa$ B: players, pathways, perspectives. *Oncogene.*  
881 2006;25:6680.
- 882 69. Morgan MJ, Liu Z. Crosstalk of reactive oxygen species and NF- $\kappa$ B signaling. *Cell Res.*  
883 2011;21:103–15.
- 884 70. Oeckinghaus A, Hayden MS, Ghosh S. Crosstalk in NF- $\kappa$ B signaling pathways. *Nat Immunol.*  
885 2011;12:695–708.
- 886 71. McGuire NL, Bentley GE. Neuropeptides in the gonads: From evolution to pharmacology.  
887 *Front Pharmacol.* 2010;1:1–13.
- 888 72. Ulrich-Lai YM, Herman JP. Neural regulation of endocrine and autonomic stress responses.  
889 *Nat Rev Neurosci.* 2009;10:397–409.
- 890 73. Todd E V, Liu H, Muncaster S, Gemmell NJ. Bending genders: The biology of natural sex  
891 change in fish. *Sex Dev.* 2016 Mar;10:223–41.
- 892 74. Liu J, Liu X, Jin C, Du X, He Y, Zhang Q. Transcriptome profiling insights the feature of sex  
893 reversal induced by high temperature in tongue sole *Cynoglossus semilaevis*. *Front Genet.*  
894 2019;10:1-15.
- 895 75. Wang Q, Liu K, Feng B, Zhang Z, Wang R, Tang L, et al. Gonad transcriptome analysis of high  
896 temperature induced sex reversal in Chinese Tongue Sole, *Cynoglossus semilaevis*. *Front Genet.*  
897 2019;10:1-11.
- 898 76. Hattori R, Castaneda-Cortes D, Arias Padilla L, Strobl-Mazzulla P, Fernandino J. Activation of  
899 stress response axis as a key process in environment  $\square$  induced sex plasticity in fish. *Cell Mol Life Sci.*  
900 2020; doi.org/10(0123456789).

- 901 77. Hilton JK, Rath P, Hellsell CVM, Beckstein O, Van Horn WD. Understanding thermosensitive  
902 transient receptor potential channels as versatile polymodal cellular sensors. *Biochemistry*.  
903 2015;54:2401–13.
- 904 78. Benham CD, Gunthorpe MJ, Davis JB. TRPV channels as temperature sensors. *Cell Calcium*.  
905 2003;33:479–87.
- 906 79. Czerwinski M, Natarajan A, Barske L, Looger LL, Capel B. A timecourse analysis of systemic  
907 and gonadal effects of temperature on sexual development of the red-eared slider turtle *Trachemys*  
908 *scripta elegans*. *Dev Biol*. 2016;420:166–77.
- 909 80. Yatsu R, Miyagawa S, Kohno S, Saito S, Lowers RH, Ogino Y, et al. *TRPV4* associates  
910 environmental temperature and sex determination in the American alligator. *Sci Rep*. 2015;5:1–10.
- 911 81. Lin JQ, Zhou Q, Yang HQ, Fang LM, Tang KY, Sun L, et al. Molecular mechanism of  
912 temperature-dependent sex determination and differentiation in Chinese alligator revealed by  
913 developmental transcriptome profiling. *Sci Bull*. 2018;63:209–12.
- 914 82. Yatsu R, Miyagawa S, Kohno S, Parrott BB, Yamaguchi K, Ogino Y, et al. RNA-seq analysis of  
915 the gonadal transcriptome during *Alligator mississippiensis* temperature-dependent sex  
916 determination and differentiation. *BMC Genomics*. 2016;77:1-13.
- 917 83. Maynard Case R, Eisner D, Gurney A, Jones O, Muallem S, Verkhatsky A. Evolution of  
918 calcium homeostasis: From birth of the first cell to an omnipresent signalling system. *Cell Calcium*.  
919 2007;42:345–50.
- 920 84. Carafoli E. The calcium-signalling saga: Tap water and protein crystals. *Nat Rev Mol Cell Biol*.  
921 2003;4:326–32.
- 922 85. Penna E, Espino J, De Stefani D, Rizzuto R. The MCU complex in cell death. *Cell Calcium*.  
923 2018;69:73–80.
- 924 86. Hoffman NE, Zhang X, Gill DL, Shanmughapriya S, Rajan S, Jog NR, et al.  $Ca^{2+}$  signals regulate  
925 mitochondrial metabolism by stimulating CREB-mediated expression of the mitochondrial  $Ca^{2+}$   
926 uniporter gene MCU. *Sci Signal*. 2015;8:73-80.
- 927 87. Strehler E, Caride A, Filoteo A, Xiong Y, Penniston J, Enyedi A. Plasma membrane  $Ca^{2+}$ -  
928 ATPases as dynamic regulators of cellular calcium handling. *Ann N Y Acad Sci*. 2013; doi:10.1196.
- 929 88. Stocker M.  $Ca^{2+}$ -activated  $K^+$  channels: Molecular determinants and function of the SK family.  
930 *Nat Rev Neurosci*. 2004;5:758–70.
- 931 89. Faber ESL, Sah P. Functions of SK channels in central neurons. *Clin Exp Pharmacol Physiol*.  
932 2007;34:1077–83.
- 933 90. Catterall W. Structure and regulation of voltage-gated  $Ca^{2+}$  channels. *Annu Rev Immunol*.  
934 2004;22:485–501.
- 935 91. Campiglio M, Flucher BE. The role of auxiliary subunits for the functional diversity of voltage-  
936 gated calcium channels. *J Cell Physiol*. 2015;230:2019–31.
- 937 92. Kumar A, Kumari S, Majhi RK, Swain N, Yadav M, Goswami C. Regulation of TRP channels by  
938 steroids: Implications in physiology and diseases. *Gen Comp Endocrinol*. 2015;220:23–32.

- 939 93. Miede S, Crause P, Schmidt T, Löhn M, Kleemann HW, Licher T, et al. Inhibition of  
940 diacylglycerol-sensitive TRPC channels by synthetic and natural steroids. *PLoS One*. 2012;7:e35393.
- 941 94. Ramsey IS, Delling M, Clapham DE. An introduction to TRP channels. *Annu Rev Physiol*.  
942 2006;68:619–47.
- 943 95. Schaefer M, Plant TD, Obukhov AG, Hofmann T, Gudermann T, Schultz G. Receptor-mediated  
944 regulation of the nonselective cation channels TRPC4 and TRPC5. *J Biol Chem*. 2000;275:17517–26.
- 945 96. Brostrom MA, Brostrom CO. Calcium dynamics and endoplasmic reticular function in the  
946 regulation of protein synthesis: Implications for cell growth and adaptability. *Cell Calcium*.  
947 2003;34:345–63.
- 948 97. Michalak M, Corbett EF, Mesaeli N, Nakamura K, Opas M. Calreticulin: One protein, one  
949 gene, many functions. *Biochem J*. 1999;344:281–92.
- 950 98. Dedhar S. Novel functions for calreticulin: interaction with integrins and modulation of gene  
951 expression? *Trends Biochem Sci*. 1994;19:269–71.
- 952 99. Echevarria W, Leite MF, Guerra MT, Zipfel WR, Nathanson MH. Regulation of calcium signals  
953 in the nucleus by a nucleoplasmic reticulum. *Nat Cell Biol*. 2003;5:440–6.
- 954 100. Burns K, Duggan B, Atkinson EA, Famulski KS, Nemer M, Bleackley RC, et al. Modulation of  
955 gene expression by calreticulin binding to the glucocorticoid receptor. *Nature*. 1994;367:476–80.
- 956 101. Michalak M, Burns K, Andrin C, Mesaeli N, Jass GH, Busaan JL, et al. Endoplasmic reticulum  
957 form of calreticulin modulates glucocorticoid- sensitive gene expression. *J Biol Chem*.  
958 1996;271:29436–45.
- 959 102. Wang X, Su M, Gao F, Xie W, Zeng Y, Li D, et al. Structural basis for activity of TRIC counter-  
960 ion channels in calcium release. *Proc Natl Acad Sci*. 2019;116:4238–43.
- 961 103. Santamaria-Kisiel L, Rintala-Dempsey A, Shaw G. Calcium-dependent and -independent  
962 interactions of the S100 protein family. *Biochem J*. 2006;396:201–14.
- 963 104. Heizmann C. S-100 proteins. In: Offermanns S, Rosenthal W, editors. *Encyclopedia of*  
964 *Molecular Pharmacology*. Berlin: Springer; 2008. p. 123–45.
- 965 105. Heizmann CW. S100 proteins: structure, functions and pathology. *Front Biosci*.  
966 2002;7:d1356.
- 967 106. Rebecchi MJ, Pentylala SN. Structure, function, and control of phosphoinositide-specific  
968 phospholipase C. *Physiol Rev*. 2000;80:1291–335.
- 969 107. Thannickal V, Fanburg B. Reactive oxygen species in cell signaling. *Am J Physiol - Lung Cell*  
970 *Mol Physiol*. 2000;279:1005–28.
- 971 108. Temple MD, Perrone GG, Dawes IW. Complex cellular responses to reactive oxygen species.  
972 *Trends Cell Biol*. 2005;15:319–26.
- 973 109. Schenk H, Klein M, Erdbrügger W, Dröge W, Schulze-Osthoff K. Distinct effects of thioredoxin  
974 and antioxidants on the activation of transcription factors NF-kappa B and AP-1. *Proc Natl Acad Sci*.  
975 1994;91:1672–6.

- 976 110. Matsuzawa A. Thioredoxin and redox signaling: Roles of the thioredoxin system in control of  
977 cell fate. *Arch Biochem Biophys.* 2017;617:101–5.
- 978 111. Van Der Vos KE, Coffey PJ. FOXO-binding partners: It takes two to tango. *Oncogene.*  
979 2008;27:2289–99.
- 980 112. Tao GZ, Lehwald N, Jang KY, Baek J, Xu B, Omary MB, et al. Wnt/ $\beta$ -catenin signaling protects  
981 mouse liver against oxidative stress-induced apoptosis through the inhibition of forkhead  
982 transcription factor *FoxO3*. *J Biol Chem.* 2013;288:17214–24.
- 983 113. Xiong Y, Uys JD, Tew KD, Townsend DM. S-Glutathionylation: From molecular mechanisms to  
984 health outcomes. *Antioxid Redox Signal.* 2011;15:233–70.
- 985 114. Yankovskaya V, Horsefield R, Törnroth S, Luna-Chavez C, Miyoshi H, Léger C, et al.  
986 Architecture of succinate dehydrogenase and reactive oxygen species generation. *Science.*  
987 2003;299:700–4.
- 988 115. Mikhed Y, Görlach A, Knaus UG, Daiber A. Redox regulation of genome stability by effects on  
989 gene expression, epigenetic pathways and DNA damage/repair. *Redox Biol.* 2015;5:275–89.
- 990 116. Cho SS, Kim KM, Yang JH, Kim JY, Park SJ, Kim SJ, et al. Induction of *REDD1* via *AP-1* prevents  
991 oxidative stress-mediated injury in hepatocytes. *Free Radic Biol Med [Internet].* 2018;124:221–31.  
992 Available from: <https://doi.org/10.1016/j.freeradbiomed.2018.06.014>
- 993 117. Tonelli C, Chio I, Tuveson D. Transcriptional Regulation by *Nrf2*. *Antioxidants Redox Signal.*  
994 2018;29:1727–45.
- 995 118. Corona-Herrera GA, Arranz SE, Martínez-Palacios CA, Navarrete-Ramírez P, Toledo-Cuevas  
996 EM, Valdez-Alarcón JJ, et al. Experimental evidence of masculinization by continuous illumination in  
997 a temperature sex determination teleost (Atherinopsidae) model: is oxidative stress involved? *J Fish*  
998 *Biol.* 2018;93:229–37.
- 999 119. Zhong P, Huang H. Recent progress in the research of cold-inducible RNA-binding protein.  
1000 *Future Sci OA.* 2017;3:FSO246.
- 1001 120. Schroeder AL, Metzger KJ, Miller A, Rhen T. A novel candidate gene for temperature-  
1002 dependent sex determination in the Common Snapping Turtle. *Genetics.* 2016;203:557–71.
- 1003 121. Haltenhof T, Kotte A, de Bortoli F, Schiefer S, Meinke S, Emmerichs A-K, et al. A conserved  
1004 kinase-based body temperature sensor globally controls alternative splicing and gene expression.  
1005 *Mol Cell.* 2020;78:1–13.
- 1006 122. Wang YT, Lim Y, McCall MN, Huang K-T, Haynes CM, Nehrke K, et al. Cardioprotection by the  
1007 mitochondrial unfolded protein response requires ATF5. *Am J Physiol Circ Physiol.* 2019;317:H472–8.
- 1008 123. Zhou D, Palam LR, Jiang L, Narasimhan J, Staschke KA, Wek RC. Phosphorylation of *eIF2*  
1009 directs *ATF5* translational control in response to diverse stress conditions. *J Biol Chem.*  
1010 2008;283:7064–73.
- 1011 124. Furukawa F, Hamasaki S, Hara S, Uchimura T, Shiraiishi E, Osafune N, et al. Heat shock factor  
1012 1 protects germ cell proliferation during early ovarian differentiation in medaka. *Sci Rep.*  
1013 2019;6927:1-10.



- 1014 125. Metchat A, Akerfelt M, Bierkamp C, Delsinne V, Sistonen L, Alexandre H, et al. Mammalian  
1015 heat shock factor 1 is essential for oocyte meiosis and directly regulates *Hsp90α* expression. J Biol  
1016 Chem. 2009;284:9521–8.
- 1017 126. Radhakrishnan S, Literman R, Neuwald J, Severin A, Valenzuela N. Transcriptomic responses  
1018 to environmental temperature by turtles with temperature-dependent and genotypic sex  
1019 determination assessed by RNAseq inform the genetic architecture of embryonic gonadal  
1020 development. PLoS One. 2017;12:e0172044.
- 1021 127. Kohno S, Katsu Y, Urushitani H, Ohta Y, Iguchi T, Guillette JLJ. Potential contributions of heat  
1022 shock proteins to temperature-dependent sex determination in the American Alligator. Sex Dev.  
1023 2010;4:73–87.
- 1024 128. Aloia L, Di Stefano B, Di Croce L. Polycomb complexes in stem cells and embryonic  
1025 development. Development. 2013;140:2525–34.
- 1026 129. Marasca F, Bodega B, Orlando V. How polycomb-mediated cell memory deals with a  
1027 changing environment: Variations in PcG complexes and proteins assortment convey plasticity to  
1028 epigenetic regulation as a response to environment. Bioessays. 2018;40:1–13.
- 1029 130. Endoh M, Endo TA, Shinga J, Hayashi K, Farcas A, Ma KW, et al. PCGF6-PRC1 suppresses  
1030 premature differentiation of mouse embryonic stem cells by regulating germ cell-related genes.  
1031 Elife. 2017;6:1–26.
- 1032 131. Cohen I, Bar C, Ezhkova E. Activity of PRC1 and histone H2AK119 monoubiquitination:   
1033 Revising popular misconceptions. Bioessays. 2020;1900192:1–8.
- 1034 132. Yang CS, Chang KY, Dang J, Rana TM. Polycomb group protein *Pcgf6* acts as a master  
1035 regulator to maintain embryonic stem cell identity. Sci Rep. 2016;6:1–12.
- 1036 133. Yan Y, Zhao W, Huang Y, Tong H, Xia Y, Jiang Q, et al. Loss of polycomb group protein *Pcgf1*  
1037 severely compromises proper differentiation of embryonic stem cells. Sci Rep. 2017;7:1–11.
- 1038 134. Fursova NA, Blackledge NP, Nakayama M, Ito S, Koseki Y, Farcas AM, et al. Synergy between  
1039 variant PRC1 complexes defines polycomb-mediated gene repression. Mol Cell. 2019;74:1020-36
- 1040 135. Blackledge NP, Farcas AM, Kondo T, King HW, McGouran JF, Hanssen LLP, et al. Variant PRC1  
1041 complex-dependent H2A ubiquitylation drives PRC2 recruitment and polycomb domain formation.  
1042 Cell. 2014;157:1445–59.
- 1043 136. Díaz N, Piferrer F. Lasting effects of early exposure to temperature on the gonadal  
1044 transcriptome at the time of sex differentiation in the European sea bass, a fish with mixed genetic  
1045 and environmental sex determination. BMC Genomics. 2015 Dec;16:2–16.
- 1046 137. Yokobayashi S, Liang CY, Kohler H, Nestorov P, Liu Z, Vidal M, et al. PRC1 coordinates timing  
1047 of sexual differentiation of female primordial germ cells. Nature. 2013;495:236–40.
- 1048 138. Shen H, Xu W, Lan F. Histone lysine demethylases in mammalian embryonic development.  
1049 Exp Mol Med. 2017;49:e325-7.
- 1050 139. Stauffer DR, Howard TL, Nyun T, Hollenberg SM. *CHMP1* is a novel nuclear matrix protein  
1051 affecting chromatin structure and cell-cycle progression. J Cell Sci. 2001;114:2383–93.

- 1052 140. Todd E V, Ortega-Recalde O, Liu H, Lamm MS, Rutherford KM, Cross H, et al. Stress, novel sex  
1053 genes and epigenetic reprogramming orchestrate socially-controlled sex change. *Sci Adv*.  
1054 2019;5:eaaw7006.
- 1055 141. Ribas L, Crespo B, Xavier D, Kuhl H, Rodríguez JM, Díaz N, et al. Characterization of the  
1056 European Sea Bass (*Dicentrarchus labrax*) gonadal transcriptome during sexual development. *Mar*  
1057 *Biotechnol*. 2019;21:359–73.
- 1058 142. Georges A, Li Q, Lian J, O’Meally D, Deakin J, Wang Z, et al. High-coverage sequencing and  
1059 annotated assembly of the genome of the Australian dragon lizard *Pogona vitticeps*. *Gigascience*.  
1060 2015;45:1-10.
- 1061 143. Dobin A, Davis CA, Schlesinger F, Drenkow J, Zaleski C, Jha S, et al. STAR: Ultrafast universal  
1062 RNA-seq aligner. *Bioinformatics*. 2013;29:15–21.
- 1063 144. Li H, Handsaker B, Wysoker A, Fennell T, Ruan J, Homer N, et al. The Sequence  
1064 Alignment/Map format and SAMtools. *Bioinformatics*. 2009;25:2078–9.
- 1065 145. Li B, Dewey CN. RSEM: accurate transcript quantification from RNA-Seq data with or without  
1066 a reference genome. *BMC Bioinformatics*. 2011;12:21–40.
- 1067 146. Robinson MD, McCarthy DJ, Smyth GK. edgeR: A Bioconductor package for differential  
1068 expression analysis of digital gene expression data. *Bioinformatics*. 2009;26:139–40.
- 1069 147. RStudio: Integrated development for R. Boston: RStudio Inc; 2015.
- 1070 148. McCarthy DJ, Chen Y, Smyth GK. Differential expression analysis of multifactor RNA-Seq  
1071 experiments with respect to biological variation. *Nucleic Acids Res*. 2012;40:4288–97.
- 1072 149. Anders S, Huber W. Differential expression analysis for sequence count data. *Genome Biol*.  
1073 2010;11:R106.
- 1074 150. Cox DR, Reid N. Parameter orthogonality and approximate conditional inference. *J R Stat Soc*  
1075 *B*. 1987;49:1–39.
- 1076 151. Chen Y, Lun ATL, Smyth GK. From reads to genes to pathways: Differential expression  
1077 analysis of RNA-Seq experiments using Rsubread and the edgeR quasi-likelihood pipeline.  
1078 *F1000Research*. 2016;5:1–49.
- 1079 152. Lun A, Chen Y, Smyth G. It’s DE-licious: A recipe for differential expression analyses of RNA-  
1080 seq experiments using quasi-likelihood methods in edgeR. In: Mathe E, Davis S, editors. *Statistical*  
1081 *Genomics*. New York: Humana Press; 2016. p. 391–416.
- 1082 153. Lund SP, Nettleton D, McCarthy DJ, Smyth GK. Detecting differential expression in RNA-  
1083 sequence data using quasi-likelihood with shrunken dispersion estimates. *Stat Appl Genet Mol Biol*.  
1084 2012;11:1-42.
- 1085 154. Lun ATL, Smyth GK. No counts, no variance: allowing for loss of degrees of freedom when  
1086 assessing biological variability from RNA-seq data. *Stat Appl Genet Mol Biol*. 2017;16:83–93.
- 1087 155. Phipson B, Lee S, Majewski IJ, Alexander WS, Smyth GK. Robust hyperparameter estimation  
1088 protects against hypervariable genes and improves power to detect differential expression. *Ann Appl*  
1089 *Stat*. 2016;10:946–63.

1090 156. Eden E, Navon R, Steinfeld I, Lipson D, Yakhini Z. GOrilla: a tool for discovery and  
 1091 visualization of enriched GO terms in ranked gene lists. BMC Bioinformatics. 2009;10:48.

1092 157. Eden E, Lipson D, Yogev S, Yakhini Z. Discovering motifs in ranked lists of DNA sequences.  
 1093 PLoS Comput Biol. 2007;3:0508–22.

1094

1095 **Table 1:** All genes, full gene names, functional categories and associations with either gene  
 1096 (ZWf) or temperature driven (ZZf) female development mentioned in the paper. NA denotes  
 1097 a gene that was mentioned, but was not differentially expressed. Genes with an asterisk are  
 1098 those that have previously been implicated in thermosensitive sex determination cascades,  
 1099 either in *Pogona vitticeps*, or in another reptile species.

| Gene ID        | Gene Name                                                 | Functional Category                                     | Association |
|----------------|-----------------------------------------------------------|---------------------------------------------------------|-------------|
| <b>ADAD1</b>   | Adenosine deaminase domain containing 1 [testis-specific] | Sex determination and differentiation (Male-specific)   | ZWf/Zf      |
| <b>ALDH1A2</b> | Retinal dehydrogenase 2                                   | Sex determination and differentiation (Male-specific)   | ZWf         |
| <b>AMH</b>     | Anti-Müllerian hormone                                    | Sex determination and differentiation                   | NA          |
| <b>AMHR2</b>   | Anti-Müllerian hormone receptor 2                         | Sex determination and differentiation                   | ZZf         |
| <b>ATF5</b>    | Activating transcription factor 5                         | Stress response                                         | ZZf         |
| <b>ATP2B1</b>  | ATPase plasma membrane Ca <sup>2+</sup> transporting 1    | Calcium signalling                                      | ZZf         |
| <b>ATP2B4</b>  | ATPase plasma membrane Ca <sup>2+</sup> transporting 4    | Calcium signalling                                      | ZZf         |
| <b>BMP7</b>    | Bone morphogenetic protein 7                              | Sex determination and differentiation                   | ZZf         |
| <b>C2CD2</b>   | C2 calcium-dependent domain containing 2                  | Calcium signalling                                      | ZZf         |
| <b>C2CD2L</b>  | C2 calcium-dependent domain containing 2 like             | Calcium signalling                                      | ZZf         |
| <b>CACNB3</b>  | Calcium voltage-gated channel auxiliary subunit beta 3    | Calcium signalling                                      | ZZf         |
| <b>CALM1</b>   | Calmodulin 1                                              | Calcium signalling                                      | ZWf/Zf      |
| <b>CALR</b>    | Calreticulin                                              | Calcium signalling                                      | ZZf         |
| <b>CAMKK1</b>  | Calcium/calmodulin dependent protein kinase kinase 1      | Calcium signalling                                      | ZZf         |
| <b>CHMP1A</b>  | Chromatin modifying protein 1A                            | Chromatin remodelling                                   | ZWf         |
| <b>CIRBP*</b>  | Cold-inducible binding protein                            | Temperature-sensing                                     | ZZf         |
| <b>CLK4*</b>   | CDC like kinase 4                                         | Temperature-sensing                                     | ZZf         |
| <b>CRH</b>     | Corticotropin releasing hormone/factor                    | Stress response                                         | ZWf         |
| <b>CYP17A1</b> | Cytochrome P450 17A1                                      | Sex determination and differentiation (Female-Specific) | ZWf/Zf      |
| <b>CYP19A1</b> | Aromatase                                                 | Sex determination and differentiation (Female-          | ZWf/Zf      |

|                  |                                                              |                                                         |             |
|------------------|--------------------------------------------------------------|---------------------------------------------------------|-------------|
|                  |                                                              | Specific)                                               |             |
| <b>DDIT4</b>     | DNA damage inducible transcript 4                            | DNA damage repair                                       | ZZf         |
| <b>DLL3</b>      | Delta like canonical Notch ligand 3                          | Sex determination and differentiation (Male-specific)   | ZWf/Z<br>Zf |
| <b>DLL4</b>      | Delta like canonical Notch ligand 4                          | Sex determination and differentiation (Male-specific)   | ZWf/Z<br>Zf |
| <b>DMRT1</b>     | Doublesex and mab-3 related transcription factor 1           | Sex determination and differentiation (Male-specific)   | NA          |
| <b>EGR1</b>      | Early growth response 1                                      | Sex determination and differentiation                   | ZZf         |
| <b>EIF1</b>      | Eukaryotic translation initiation factor 1                   | Translation initiation                                  | ZZf         |
| <b>EIF4A2</b>    | Eukaryotic translation initiation factor 4A2                 | Translation initiation                                  | ZZf         |
| <b>ENDOD1</b>    | Endonuclease domain containing 1                             | DNA damage repair                                       | ZZf         |
| <b>ESR2</b>      | Estrogen receptor 2                                          | Sex determination and differentiation (Female-Specific) | ZWf         |
| <b>ESRRG</b>     | Estrogen related receptor gamma                              | Sex determination and differentiation (Female-Specific) | ZZf         |
| <b>FIGLA</b>     | Folliculogenesis specific basic helix-loop-helix             | Sex determination and differentiation (Female-Specific) | ZWf/Z<br>Zf |
| <b>FOXL2</b>     | Forkhead box L2                                              | Sex determination and differentiation (Female-Specific) | ZWf/Z<br>Zf |
| <b>FOXO3</b>     | Forkhead box O3                                              | Redox regulation                                        | ZZf         |
| <b>FZD1</b>      | Frizzled class receptor 1                                    | Sex determination and differentiation                   | ZZf         |
| <b>GADD45 G</b>  | Growth arrest and DNA damage inducible gamma                 | Sex determination and differentiation                   | ZWf         |
| <b>GATA6</b>     | GATA binding factor 6                                        | Sex determination and differentiation                   | ZWf         |
| <b>GCA</b>       | Grancalcin                                                   | Calcium signalling                                      | ZWf         |
| <b>GLRX</b>      | Glutaredoxin                                                 | Redox regulation                                        | ZZf         |
| <b>GPX1</b>      | Glutathione peroxidase                                       | Redox regulation                                        | ZZf         |
| <b>HERC2</b>     | HECT and RLD domain containing E3 ubiquitin protein ligase 2 | DNA damage repair                                       | ZZf         |
| <b>HNRNPU L1</b> | Heterogeneous nuclear ribonucleoprotein U like 1             | Splicing                                                | ZWf/Z<br>Zf |
| <b>HSD17B3</b>   | Hydroxysteroid 17-beta dehydrogenase 3                       | Sex determination and differentiation                   | ZZf         |
| <b>HSP40</b>     | DnaJ heat shock protein family (hsp40) member B1             | Temperature-sensing                                     | ZZf         |
| <b>HSP90AB 1</b> | Heat shock protein 90 alpha family class B member 1          | Temperature-sensing                                     | ZWf/Z<br>Zf |
| <b>HSPA4</b>     | Heat shock protein family A (Hsp70) member 4                 | Temperature-sensing                                     | ZWf/Z<br>Zf |
| <b>HSPB1</b>     | Heat shock protein family B (Small) member 1                 | Temperature-sensing                                     | ZWf/Z<br>Zf |

|                    |                                                                 |                                                         |             |
|--------------------|-----------------------------------------------------------------|---------------------------------------------------------|-------------|
| <b>HSPB11</b>      | Heat shock protein family B (Small) member 11                   | Temperature-sensing                                     | ZWf/Z<br>Zf |
| <b>HSPD1</b>       | Heat shock protein family D (Hsp60) member 1                    | Temperature-sensing                                     | ZWf/Z<br>Zf |
| <b>HSPH1</b>       | Heat shock protein family H (Hsp110) member 1                   | Temperature-sensing                                     | ZWf/Z<br>Zf |
| <b>IKBKGN/EMO</b>  | NF-κB essential modulator                                       | NF-κB pathway                                           | ZWf         |
| <b>JAG2</b>        | Jagged 2                                                        | Sex determination and differentiation                   | ZWf         |
| <b>JARID2*</b>     | Jumonji and AT-rich interaction domain containing 2             | Chromatin remodelling                                   | ZZf         |
| <b>KCNN1</b>       | Small conductance calcium-activated potassium channel protein 1 | Calcium signalling                                      | ZZf         |
| <b>KCTD1</b>       | Potassium channel tetramerization domain containing 1           | Sex determination and differentiation (Male-specific)   | ZZf         |
| <b>KDM1A</b>       | Lysine demethylase 1A                                           | Chromatin remodelling                                   | ZWf/Z<br>Zf |
| <b>KDM2B</b>       | Lysine demethylase 2B                                           | Chromatin remodelling                                   | ZWf/Z<br>Zf |
| <b>KDM3B</b>       | Lysine demethylase 3B                                           | Chromatin remodelling                                   | ZWf/Z<br>Zf |
| <b>KDM5B</b>       | Lysine demethylase 5B                                           | Chromatin remodelling                                   | ZWf/Z<br>Zf |
| <b>KDM6B*</b>      | Lysine demethylase 6B                                           | Chromatin remodelling                                   | ZZf         |
| <b>LHX9</b>        | LIM homeobox 9                                                  | DNA damage repair                                       | ZWf         |
| <b>LIG4</b>        | DNA ligase 4                                                    | DNA damage repair                                       | ZZf         |
| <b>MAP3K8</b>      | Mitogen-activated protein kinase kinase kinase 8                | Stress response                                         | ZWf/Z<br>Zf |
| <b>MAPK1</b>       | Mitogen-activated protein kinase 1                              | Stress response                                         | ZWf/Z<br>Zf |
| <b>MAPK9</b>       | Mitogen-activated protein kinase 9                              | Stress response                                         | ZWf/Z<br>Zf |
| <b>MCU</b>         | Mitochondrial calcium uniporter                                 | Calcium signalling                                      | ZZf         |
| <b>MGST1</b>       | Microsomal glutathione S-transferase 1                          | Redox regulation                                        | ZZf         |
| <b>NANOS1</b>      | Nanos C2HC-type zinc finger 1                                   | Sex determination and differentiation (Female-Specific) | ZWf         |
| <b>NCOA4</b>       | Nuclear receptor coactivator 4                                  | Sex determination and differentiation                   | ZZf         |
| <b>NEIL3</b>       | Nei like DNA glycosylase 3                                      | DNA damage repair                                       | ZZf         |
| <b>NR5A1</b>       | Nuclear receptor subfamily 5 group A member 1                   | Sex determination and differentiation                   | ZZf         |
| <b>NRF2</b>        | Nuclear factor, erythroid 2 like 2                              | Redox regulation                                        | NA          |
| <b>PCGF1</b>       | Polycomb group ring finger 1                                    | Chromatin remodelling                                   | ZZf         |
| <b>PCGF2/Mel18</b> | Polycomb group ring finger 2                                    | Chromatin remodelling                                   | ZWf         |
| <b>PCGF6</b>       | Polycomb group ring finger 6                                    | Chromatin remodelling                                   | ZZf         |
| <b>PCYOX1L</b>     | Prenylcysteine oxidase 1 like                                   | Redox regulation                                        | ZZf         |

|                             |                                                                                     |                                                         |        |
|-----------------------------|-------------------------------------------------------------------------------------|---------------------------------------------------------|--------|
| <b><i>PDGFB</i></b>         | Platelet derived growth factor subunit B, paralog of mammalian <i>PDGFA</i>         | Sex determination and differentiation                   | ZZf    |
| <b><i>PGR</i></b>           | Progesterone receptor                                                               | Sex determination and differentiation (Female-Specific) | ZWf    |
| <b><i>PLCB1</i></b>         | Phospholipase C Beta 1                                                              | Calcium signalling                                      | ZZf    |
| <b><i>PLCL2</i></b>         | Phospholipase C like 2                                                              | Calcium signalling                                      | ZZf    |
| <b><i>POMC</i></b>          | Proopiomelanocortin                                                                 | Stress response                                         | NA     |
| <b><i>PRDX3</i></b>         | Peroiredoxin 3                                                                      | Redox regulation                                        | ZZf    |
| <b><i>PRKCI</i></b>         | Protein kinase C iota                                                               | NF-kB pathway                                           | ZWf    |
| <b><i>RSPO1</i></b>         | R-spondin 1                                                                         | Sex determination and differentiation (Female-Specific) | ZWf/Zf |
| <b><i>S100Z</i></b>         | S100 calcium binding protein Z                                                      | Calcium signalling                                      | ZZf    |
| <b><i>SFRP2</i></b>         | Secreted frizzled related protein 2                                                 | Sex determination and differentiation (Male-specific)   | ZZf    |
| <b><i>SOX4</i></b>          | SRY-box transcription factor 4                                                      | Sex determination and differentiation (Male-specific)   | ZWf    |
| <b><i>SOX9</i></b>          | Sry-box 9                                                                           | Sex determination and differentiation (Male-specific)   | NA     |
| <b><i>SQOR</i></b>          | Sulfide quinone oxidoreductase                                                      | Redox regulation                                        | ZZf    |
| <b><i>SRD5A2</i></b>        | Steroid 5 alpha reductase 2                                                         | Sex determination and differentiation                   | ZWf    |
| <b><i>STAT1</i></b>         | Signal transducer and activator of transcription 1                                  | Stress response                                         | ZWf    |
| <b><i>STAT4</i></b>         | Signal transducer and activator of transcription 4                                  | Stress response                                         | ZZf    |
| <b><i>STRA8</i></b>         | Stimulated by retinoic acid 8                                                       | Sex determination and differentiation                   | ZWf/Zf |
| <b><i>TERF2IP</i></b>       | Telomeric repeat-binding factor 2-interacting protein 1                             | NF-kB pathway                                           | ZWf    |
| <b><i>TGFBR3L</i></b>       | Transforming growth factor beta receptor 3-like, paralog of mammalian <i>TGFBR3</i> | Sex determination and differentiation                   | ZZf    |
| <b><i>TMEM38B/TRICB</i></b> | Trimeric intracellular cation channel type B                                        | Calcium signalling                                      | ZZf    |
| <b><i>TRPC4</i></b>         | Transient receptor potential cation channel subfamily C member 4                    | Temperature-sensing                                     | ZZf    |
| <b><i>TRPV2*</i></b>        | Transient receptor potential cation channel subfamily V member 2                    | Temperature-sensing                                     | ZZf    |
| <b><i>TXNDC11</i></b>       | Thioredoxin domain containing 11                                                    | Redox regulation                                        | ZZf    |
| <b><i>UBE2J1</i></b>        | Ubiquitin-conjugating enzyme E2 J1                                                  | Sex determination and differentiation                   | ZWf/Zf |
| <b><i>UCP2</i></b>          | Oxidative stress responsive-gene uncoupling protein-2                               | Redox regulation                                        | ZZf    |
| <b><i>WNT5a</i></b>         | Wnt family member 5a                                                                | Sex determination and differentiation                   | ZZf    |

## 1101 **Figure Captions**

1102 **Fig. 1:** Schematic representation of experimental design used in this study to compare the  
1103 differences between genetic sex determination and temperature dependent sex  
1104 determination. **(A)** Summary of experiment showing how the parental crosses were  
1105 designed, and how eggs were allocated and incubated. Eggs from sex reversed females (ZZf)  
1106 were initially incubated at 28°C for 10 days, then were switched to 36°C. Eggs were sampled  
1107 at the same three developmental stages (6, 12, and 15) based on (19,20). At stage 6 the  
1108 gonad is bipotential, at stage 12 the gonad is in the early stages of differentiation, and it  
1109 completely differentiated by stage 15. Eggs from concordant females (ZWf) were incubated  
1110 at 28°C and sampled at the same three developmental stages as the ZZf eggs. **(B)** PCA plots  
1111 showing the first and second principal components of read count per gene between ZZf  
1112 (red) and ZWf (blue) at each stage of development.

1113 **Fig. 2:** Schematic overview of gene-driven (blue) and temperature-driven (red) female  
1114 developmental pathways in *Pogona vitticeps*. The pathways are initially different (from  
1115 stages 6 to 12), but they ultimately converge on highly similar expression profiles when  
1116 ovarian differentiation has occurred by stage 15. Both pathways are characterised by  
1117 repression of a male signal, however this signal is stronger in temperature-driven females  
1118 and appears to require ongoing repression when compared with the gene-driven females.

1119 **Fig. 3:** **(A)** Expression (transcripts per million, TPM)  $\pm$  SE of three genes differentially  
1120 expressed at all three developmental stages between ZZf and ZWf, with *KDM6B* and *CIRPB*  
1121 (outlined in red) having consistently higher expression in ZZf embryos, and *GCA* having  
1122 higher expression in ZWf. **(B)** Bar graphs representing the number of differentially expressed  
1123 genes in all comparisons between ZZf and ZWf, and between developmental stages. MA  
1124 plots of this data are available in Fig. S1. Differentially expressed genes were determined as  
1125 having  $P$  values  $\leq 0.01$  and  $\log_2$ -fold changes of 1, -1.

1126 **Fig. 4:** Hypothesized pathway for the maintenance of the ovarian phenotype in stage 12 sex  
1127 reversed ZZf *Pogona vitticeps*. Given the upregulation of these genes, it is likely that reactive  
1128 oxygen species induce the phosphorylation, and subsequent activation and nuclear  
1129 translocation of STAT4, likely mediated by PDGFB. Once in the nucleus, STAT4 is able to bind

1130 to promoter regions of known target genes, *NR5A1*, *AMHR2* and *EGR2* to regulate their  
1131 expression and promote ovarian development.

1132 **Fig. 5:** (A) A subset of GO processes and (C) GO functions enriched in stage 6 ZZf embryos  
1133 compared with ZWf. (B) A subset of GO processes and (D) GO functions enriched in stage 6  
1134 ZWf embryos compared with ZZf. Complete results of GO analysis for all developmental  
1135 stages in ZZf and ZWf for enriched GO processes and functions is provided in Additional file  
1136 S2. Differentially expressed chromatin modifier (E) and cellular stress (F) genes in *Pogona*  
1137 *vitticeps* at stage 6 comparing ZWf and ZZf females.

1138 **Fig. 6:** K-means clustering analysis on normalized counts per million for ZZf (A) and ZWf (B)  
1139 across all developmental stages. The colour depicts the correlation score of each gene in the  
1140 cluster, where numbers approaching one (red) have the strongest correlation. All gene lists  
1141 produced for each cluster are provided in Additional file S5.

1142 **Fig. 7:** Hypothesised cellular environment (A) of a ZZf gonad at stage 6 in *Pogona vitticeps*  
1143 based on differential expression analysis (B) using the CaRe model as a framework (13). We  
1144 used this approach to understand the cellular context responsible for driving sex reversal in  
1145 ZZf samples. This reveals that calcium signalling likely plays a very important role in  
1146 mediating the temperature signal to determine sex. Influx of intracellular calcium is likely  
1147 mediated primarily by TRPV2, and may also be influenced by KCNN1 and CACNB3. This influx  
1148 appears to trigger significant changes in the cell to maintain calcium homeostasis. MCU,  
1149 ATP2B1, CALR and TRICB all play a role in this process by sequestering calcium and pumping  
1150 it back out of the cell, in which KCNN1 and CACNB3 may have a role. Calcium signalling  
1151 molecules C2CD2, C2CDL2, and S100Z are likely responsible for encoding and translating the  
1152 calcium signal leading to changes in gene transcription. Changes in gene expression are  
1153 likely mediated primarily by the two major Polycomb Repressive Complexes, PRC1 and  
1154 PRC2. Members of these two complexes (PCGF1, PCGF6, KDM6B, and JARID2)  
1155 transcriptionally regulate genes by controlling methylation dynamics of their targets, the  
1156 latter two of which have been previously implicated in sex reversal (14,15). ATF5 may also  
1157 play a role in gene regulation, and alternative splicing, which has been implicated in sex  
1158 reversal (14) may be mediated by CLK4. High temperatures necessarily increase cellular  
1159 metabolism, which in turn increases the amount of reactive oxygen species (ROS) produced  
1160 by the mitochondria. ROS can cause cellular damage at high levels, so trigger an antioxidant



1161 response, which is observed here in the upregulation of MGST1, PRDX3, TXNDC11 and  
1162 FOXO3. Also of note is the upregulation of CIRBP, which has numerous functions in response  
1163 to diverse cellular stresses, and has been implicated in TSD.

## 1164 **Supplementary Materials**

1165 **Additional file S1:** Differentially expressed genes between developmental stages 6 and 12,  
1166 and 12 and 15 for ZZf and ZWf females generated from EdgeR's "topTags" function. Results  
1167 are sorted by log-fold change, with a cut-off of 1 or -1 applied, and a P-value threshold of  
1168 0.01. For the stage 6 and 12 comparison, genes with positive log-fold changes are  
1169 upregulated at stage 12, while for the stage 12 and 15 comparison, genes with a positive  
1170 log-fold change are upregulated at stage 15. No genes were differentially expressed  
1171 between stages 12 and 15 in ZZf females.

1172 **Additional file S2:** Gene ontology (GO) enrichment for process and function for the stage 6  
1173 and 12 comparison for ZZf and ZWf (Additional file S1). GO enrichment was not possible for  
1174 the stage 12 and 15 comparison because differentially expressed genes were lacking. GO  
1175 enrichment was generated from GOrilla (156,157) at a significance threshold of  $P \leq 0.05$ .

1176 **Additional file S3:** Differentially expressed genes between ZZf and ZWf for each  
1177 developmental stage generated from EdgeR's "topTags" function. Results are sorted by log-  
1178 fold change, with a cut-off of 1 or -1 applied, and a P-value threshold of 0.01 Genes with  
1179 positive log-fold changes are upregulated in ZZf embryos, genes with negative log-fold  
1180 changes are upregulated in ZWf.

1181 **Additional file S4:** Gene ontology (GO) enrichment for process and function generated from  
1182 GOrilla (156,157) at a significance threshold of  $P \leq 0.05$  for differentially expressed genes at  
1183 stages 6 and 12 for ZZf and ZWf samples (Additional file S3).

1184 **Additional file S5:** Gene list outputs for K-means clustering analysis ( $n = 6$ ), and comparative  
1185 information for matched clusters between ZZf and ZWf (ZZC1 and ZWC1, and ZCC2 and  
1186 ZWC4) including genes that are unique and shared between each cluster.

1187 **Additional file S6:** Gene ontology (GO) process and function enrichment for genes in ZZf C1,  
1188 and genes shared between ZZC5 and ZWC3 generated from GOrilla (156,157) at a  
1189 significance threshold of  $P \leq 0.05$ .

1190 **Additional file S7:** Summary of all embryonic gonad samples sequenced for this study,  
1191 including incubation temperature, genotype, parental cross, developmental stage, and  
1192 clutch for each sample. Unique sample identifiers are matched to those used in raw data  
1193 inputs (Additional file S10, S11).

1194 **Additional file S8:** Outputs from pairwise T-tests conducted between stage 15 ( $n = 7$ ) and  
1195 stage 15 ZZf samples suspected not to have undergone sex reversal ( $n = 2$ ). The normalised  
1196 transcripts per million (TPM) for six genes, three male (*AMH*, *DMRT1*, *SOX9*) and three  
1197 female genes (*FOXL2*, *CYP19A1*, *CYP17A1*) were used. The two samples suspected of not  
1198 undergoing sex reversal show significantly different expression levels for four of these  
1199 genes, and differences just above the significance threshold of  $\leq 0.05$  for the other two  
1200 genes. On this basis, these two samples were removed from further analysis.

1201 **Additional file S9:** Outputs from one way analysis of variance (ANOVAs) between all  
1202 clutches (clutch 1, 2, 3, 6, and 9) across each developmental stage (6, 12 and 15) for a panel  
1203 of sex specific genes (*AMH*, *SOX9* and *DMRT1*) to determine whether clutch 9 exhibits  
1204 aberrant expression levels. The normalised transcripts per million (TPM) generated from the  
1205 EdgeR pipeline described in the materials and methods was used. Based on the results from  
1206 this analysis, five samples from clutch 9 were excluded from further analysis.

1207 **Additional file S10:** Raw counts for all samples ( $n = 39$ ) for all genes ( $n = 19,284$ ) prior to any  
1208 filtering or sample removal. Sample ID labels correspond to incubation temperature (36 or  
1209 28), maternal genotype/maternal homozygosity/maternal heterozygosity (ZZf or ZWf),  
1210 sample stage ( $s1 = \text{stage } 6$ ,  $s2 = \text{stage } 12$ ,  $s3 = \text{stage } 15$ ), clutch number ( $c1$ ,  $c2$ , etc.), and  
1211 replicate ID (e.g., "a" denotes the sample was the first replicate for that sampling point).  
1212 Sample data is also available in Additional file S7.

1213 **Additional file S11:** Raw expression values (TPM, transcripts per million) all samples ( $n = 39$ )  
1214 for all genes ( $n = 19,284$ ) prior to any filtering or sample removal. Sample ID labels  
1215 correspond to incubation temperature (36 or 28), maternal genotype/maternal

1216 homozygosity/maternal heterozygosity (ZZf or ZWf), sample stage (s1 = stage 6, s2 = stage  
1217 12, s3 = stage 15), clutch number (c1, c2, etc.), and replicate ID (e.g., “a” denotes the sample  
1218 was the first replicate for that sampling point). Sample data is also available in Additional file  
1219 S7.

1220 **Fig. S1:** MA plots of read counts per gene from differential expression analysis conducted  
1221 between ZZf and ZWf (A) and comparisons between stages for both ZZf and ZW (B).  
1222 Differentially expressed genes ( $P$  values  $\leq 0.01$ ,  $\log_2$ -fold change of 1, -1) are coloured  
1223 (colour indicative of significant fold change), and the total number of genes are indicated in  
1224 each plot. Grey indicates no differential expression, horizontal lines indicate  $\log_2$ -fold  
1225 changes of 1, -1. CPM: normalised counts per million

1226 **Fig. S2:** Network analysis of parental and offspring SNPs to confirm paternity of clutches  
1227 used in this experiment. SNP data was generated by Dart sequencing, a reduced genome  
1228 representation sequencing method at Diversity Arrays Technology, University of Canberra.

1229 **Fig. S3:** Expression (TPM, transcripts per million) of female-specific genes (*CYP17A1*, *FOXL2*,  
1230 *CYP19A1*; panel A) and male-specific genes (*DMRT1*, *SOX9*, *AMH*; panel B) across three  
1231 developmental stages (6, 12, 15) (19,20) for all samples to aid in the identification of  
1232 samples with aberrant expression patterns. Samples from later developmental stages that  
1233 exhibit low expression of female-specific genes are likely to have not undergone sex  
1234 reversal. Sample ID labels correspond to incubation temperature (36°C or 28°C in red or  
1235 blue respectively), maternal genotype/maternal homozygosity/maternal heterozygosity (ZZf  
1236 or ZWf), sample stage (s1 = stage 6, s2 = stage 12, s3 = stage 15), clutch number (c1, c2,  
1237 etc.), and replicate ID (e.g., “a” denotes the sample was the first replicate for that sampling  
1238 point).

1239 **Fig. S4:** Principal components analysis (PCA) plots performed on normalised counts per  
1240 million for filtered genes following the EdgeR pipeline described in the materials and  
1241 methods section. (A) PCA of all samples (n = 39) (B) PCA of samples with clutch 9 removed (n  
1242 = 32) (C) PCA of samples with clutch 9 samples removed and two samples that had not  
1243 undergone sex reversal. This is the final dataset upon which all analysis was performed (n =  
1244 30).

**A****Breeding Design**

bioRxiv preprint doi: <https://doi.org/10.1101/2021.02.03.429474>; this version posted February 4, 2021. The copyright holder for this preprint (which was not certified by peer review) is the author/funder, who has granted bioRxiv a license to display the preprint in perpetuity. It is made available under aCC-BY-NC-ND 4.0 International license.

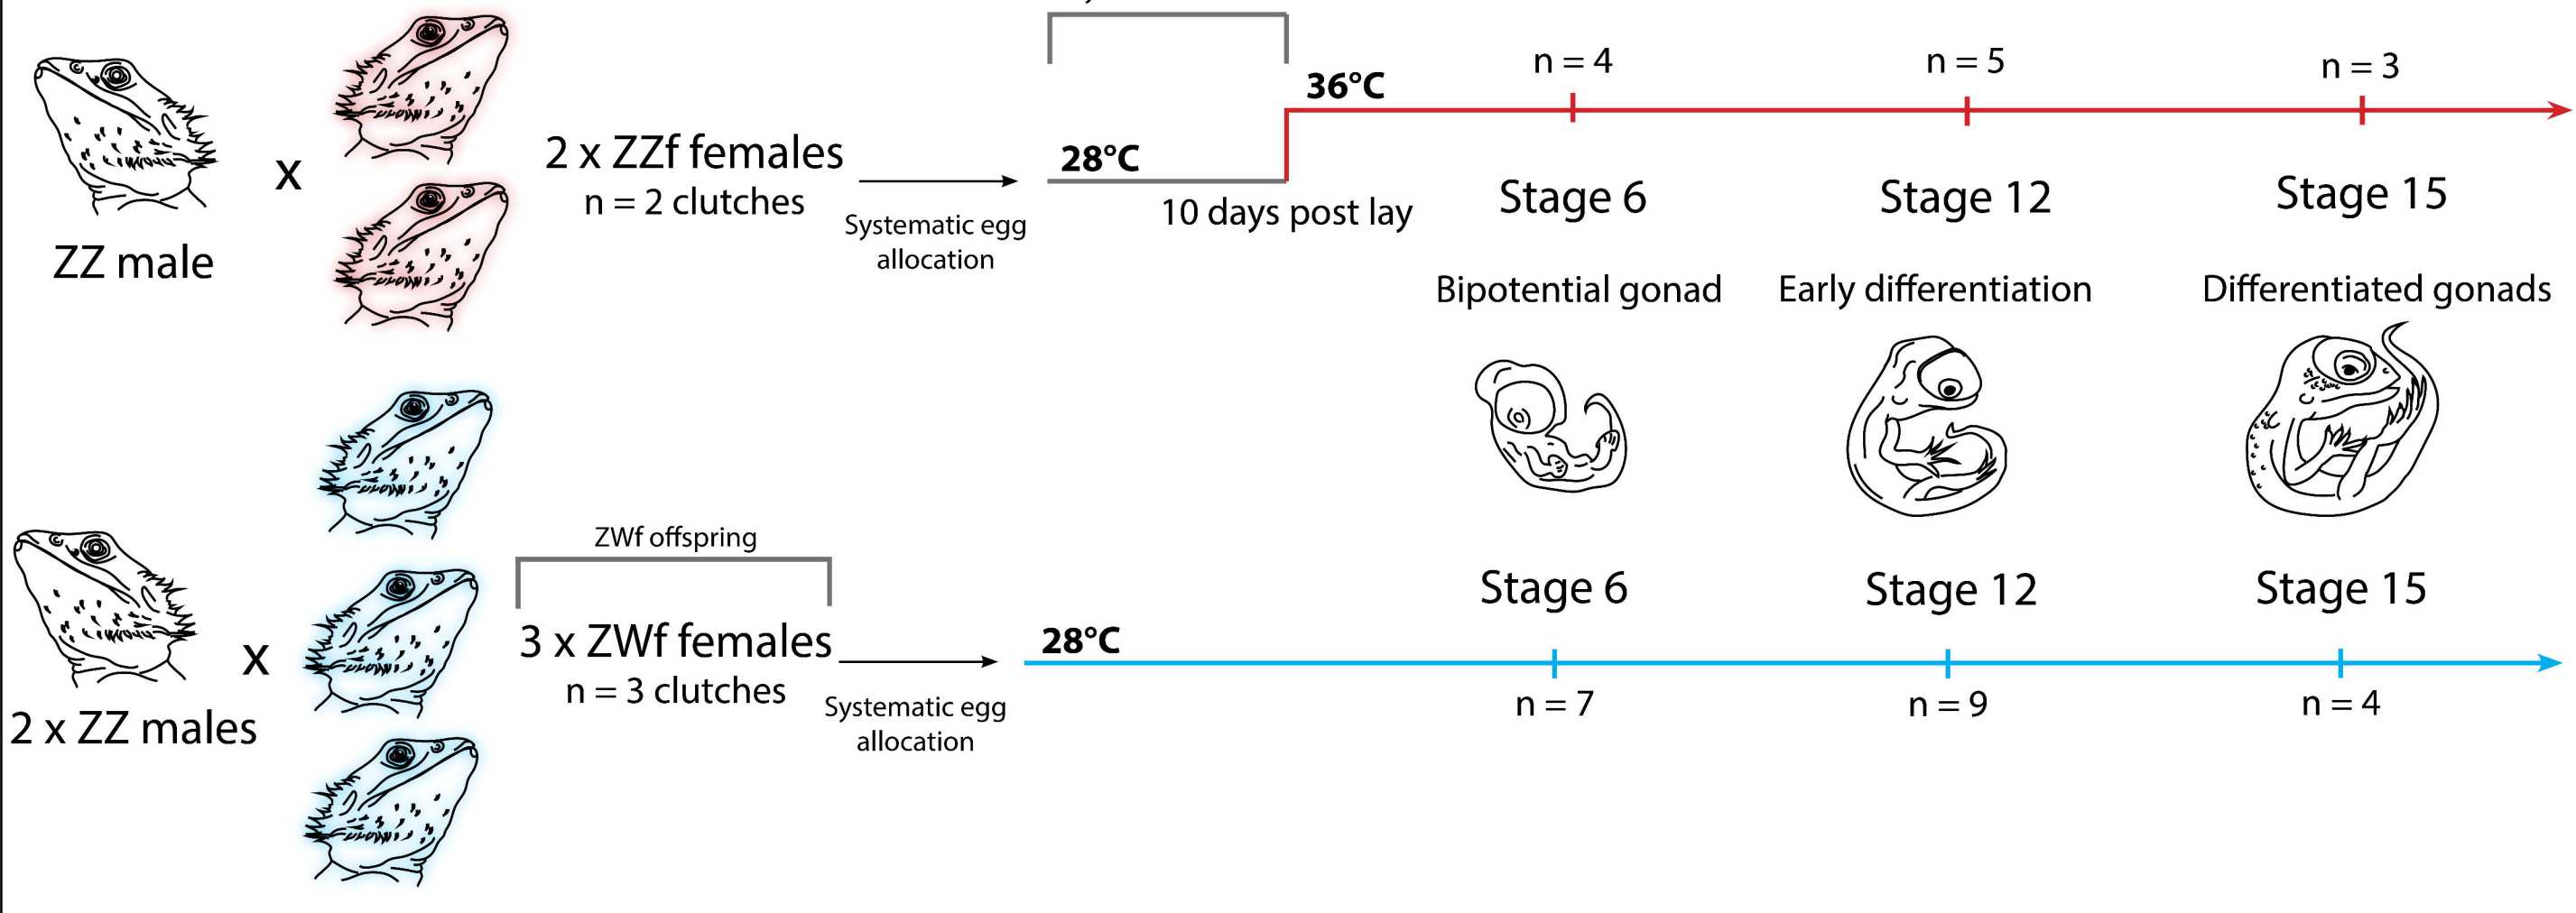**B**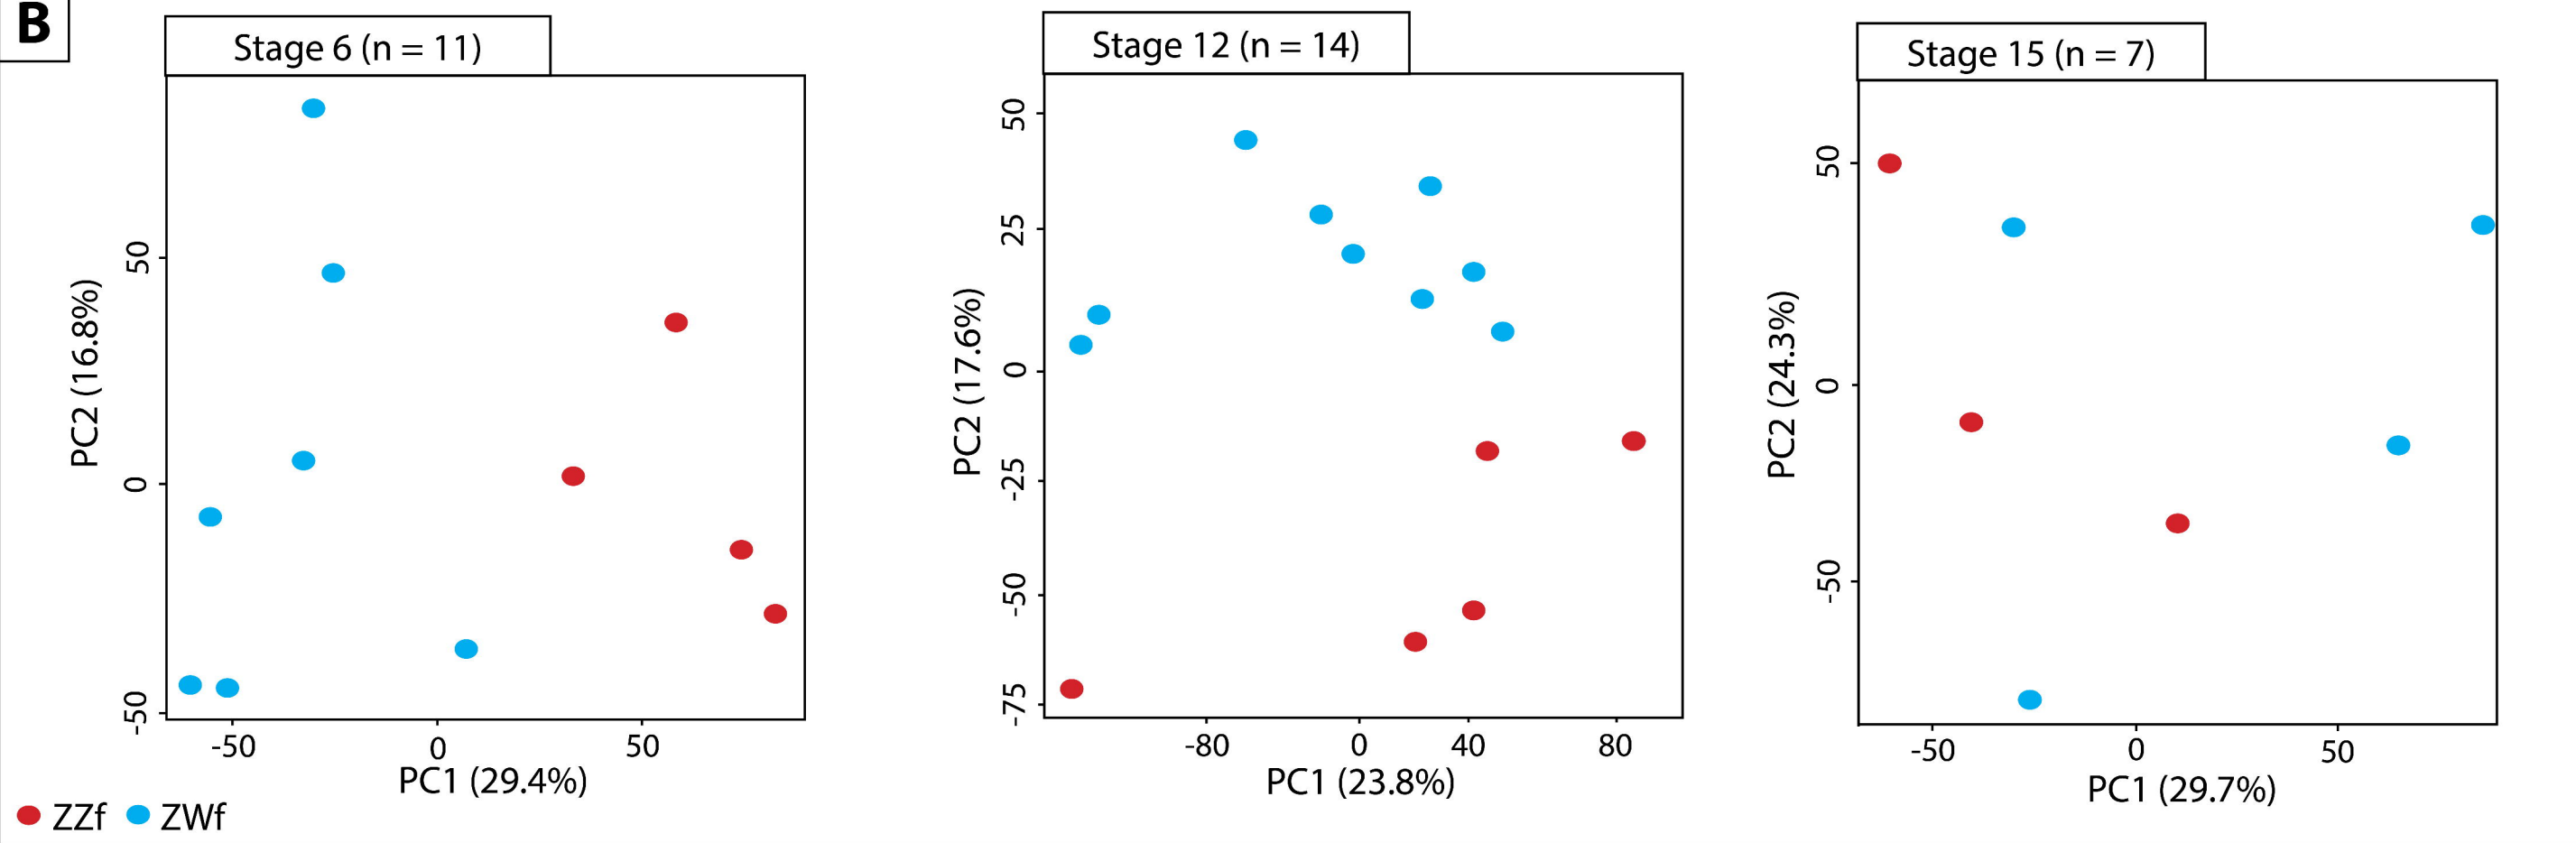

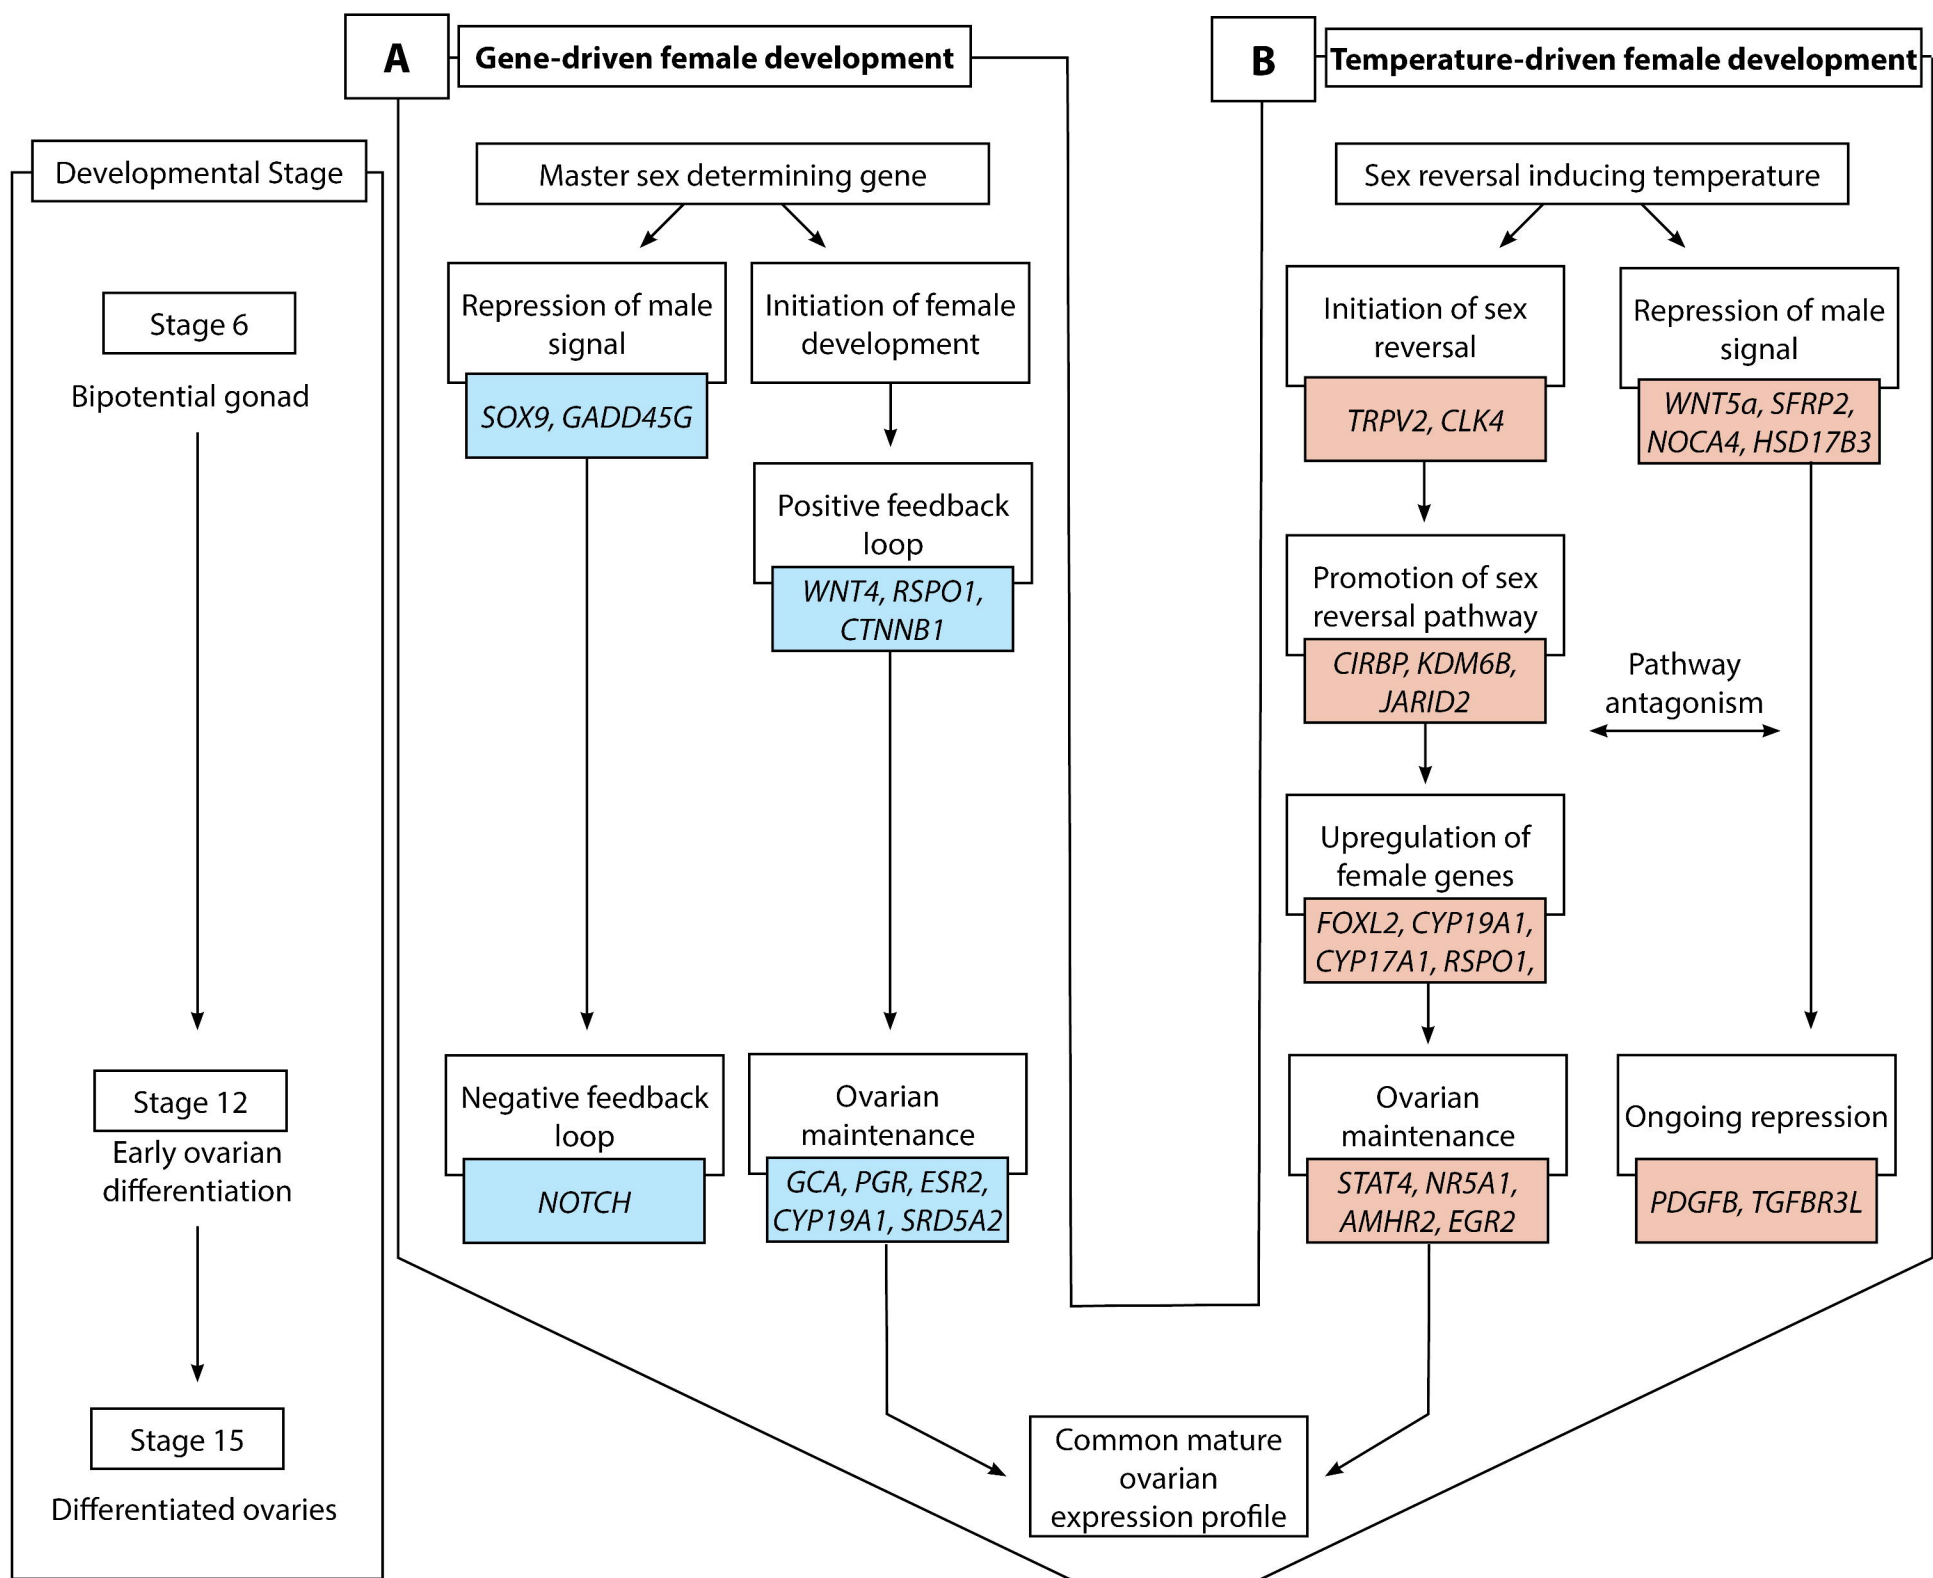

**A**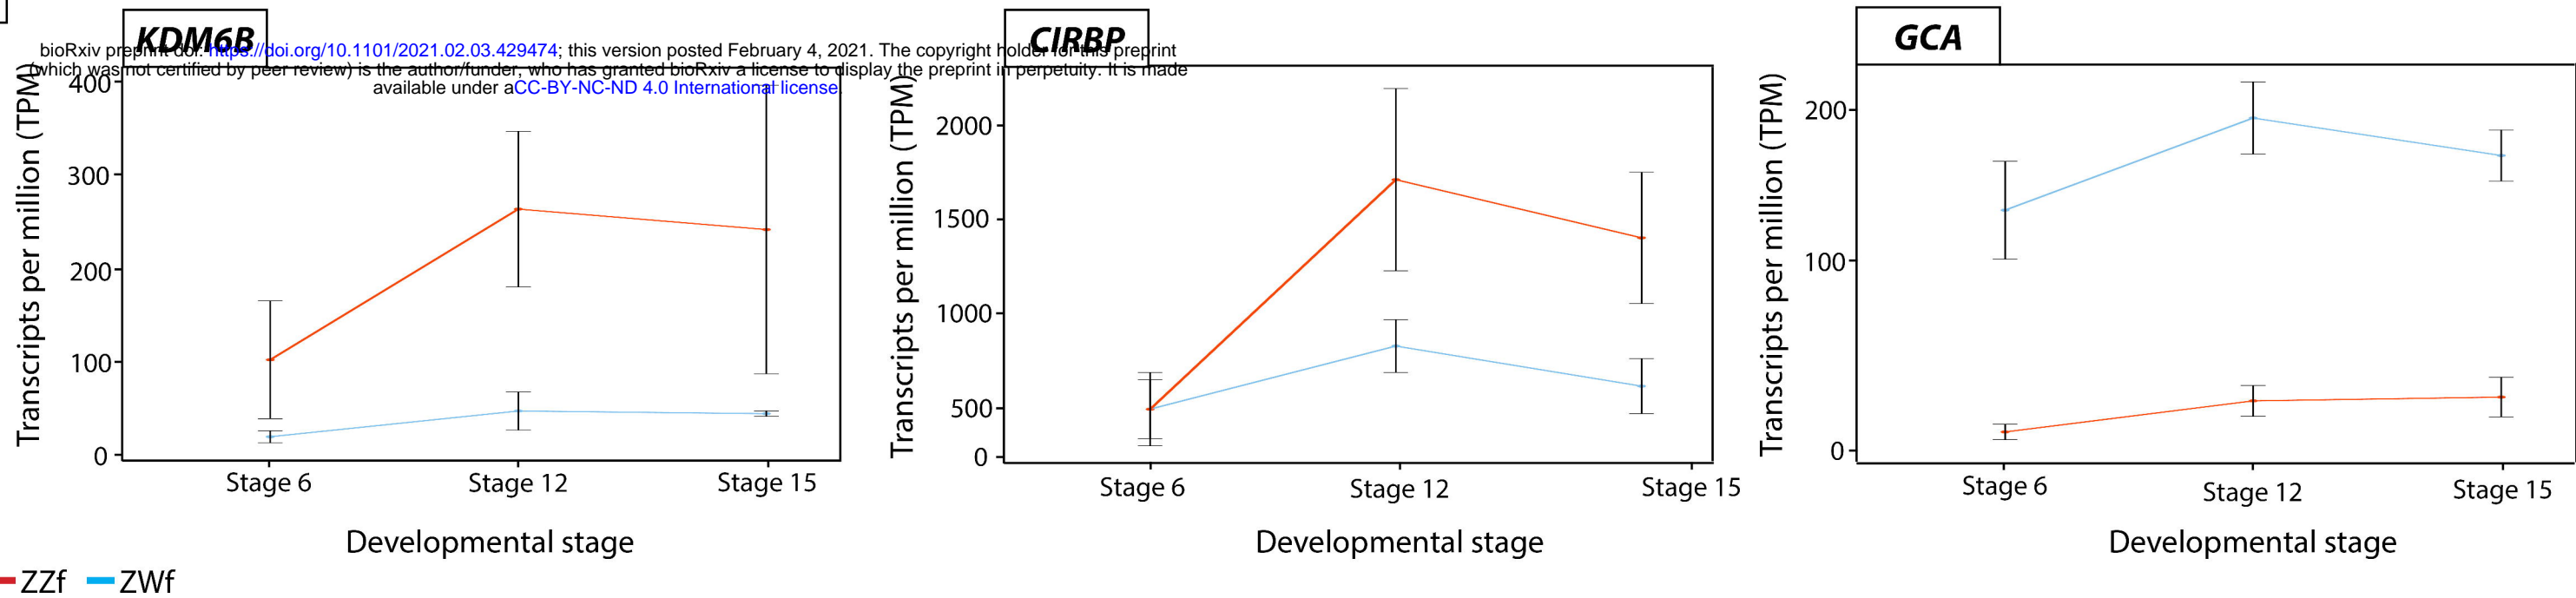**B**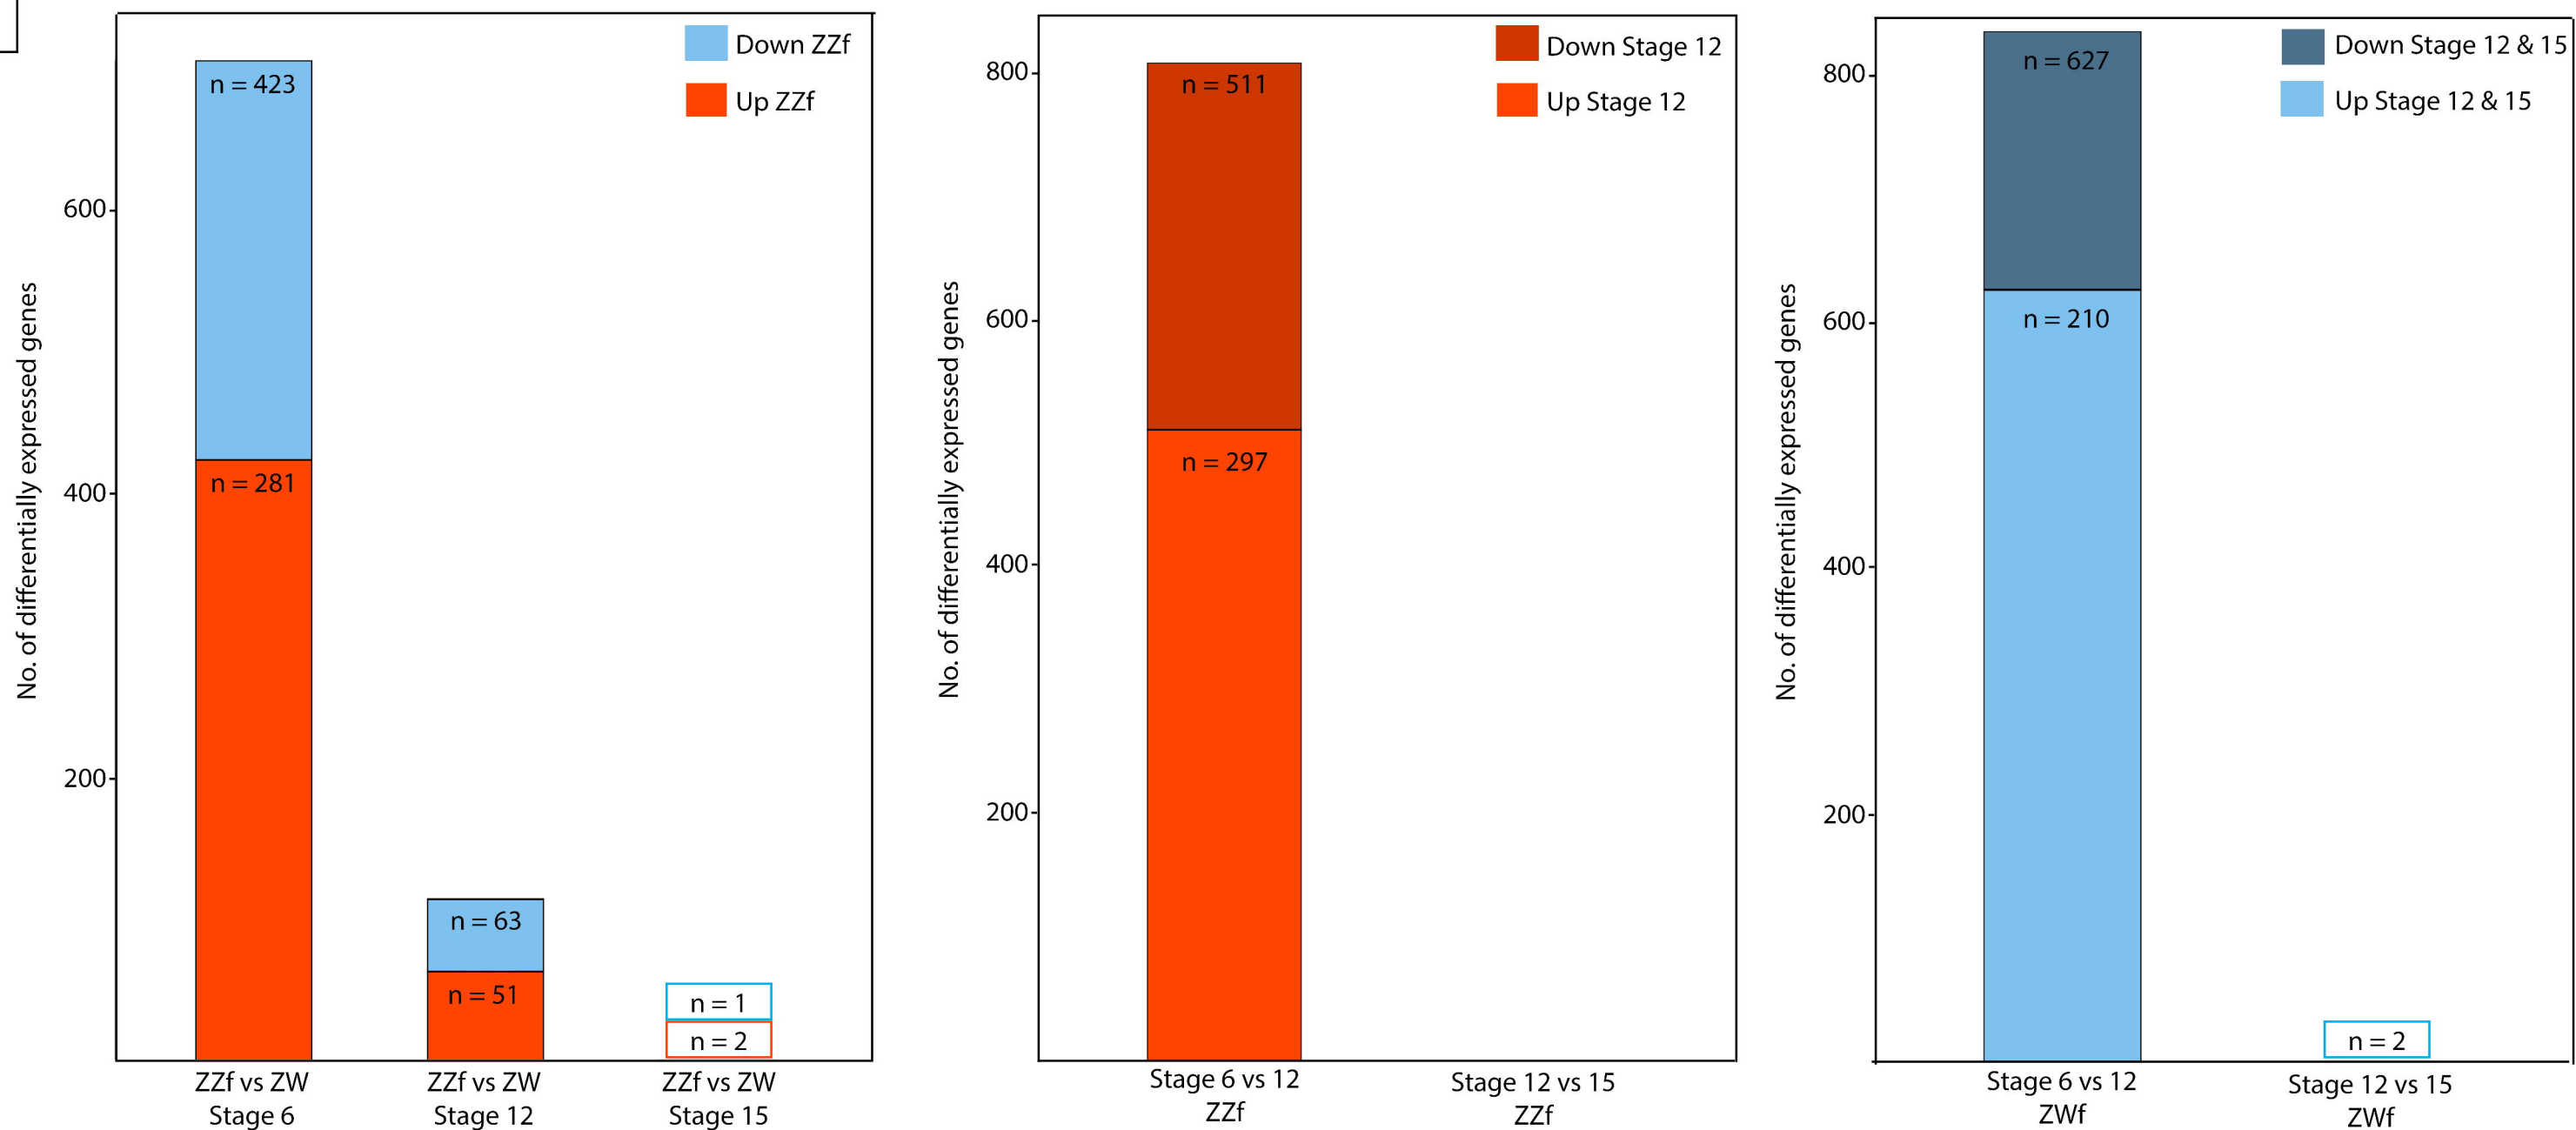

**A**

Cytoplasm

Nucleus

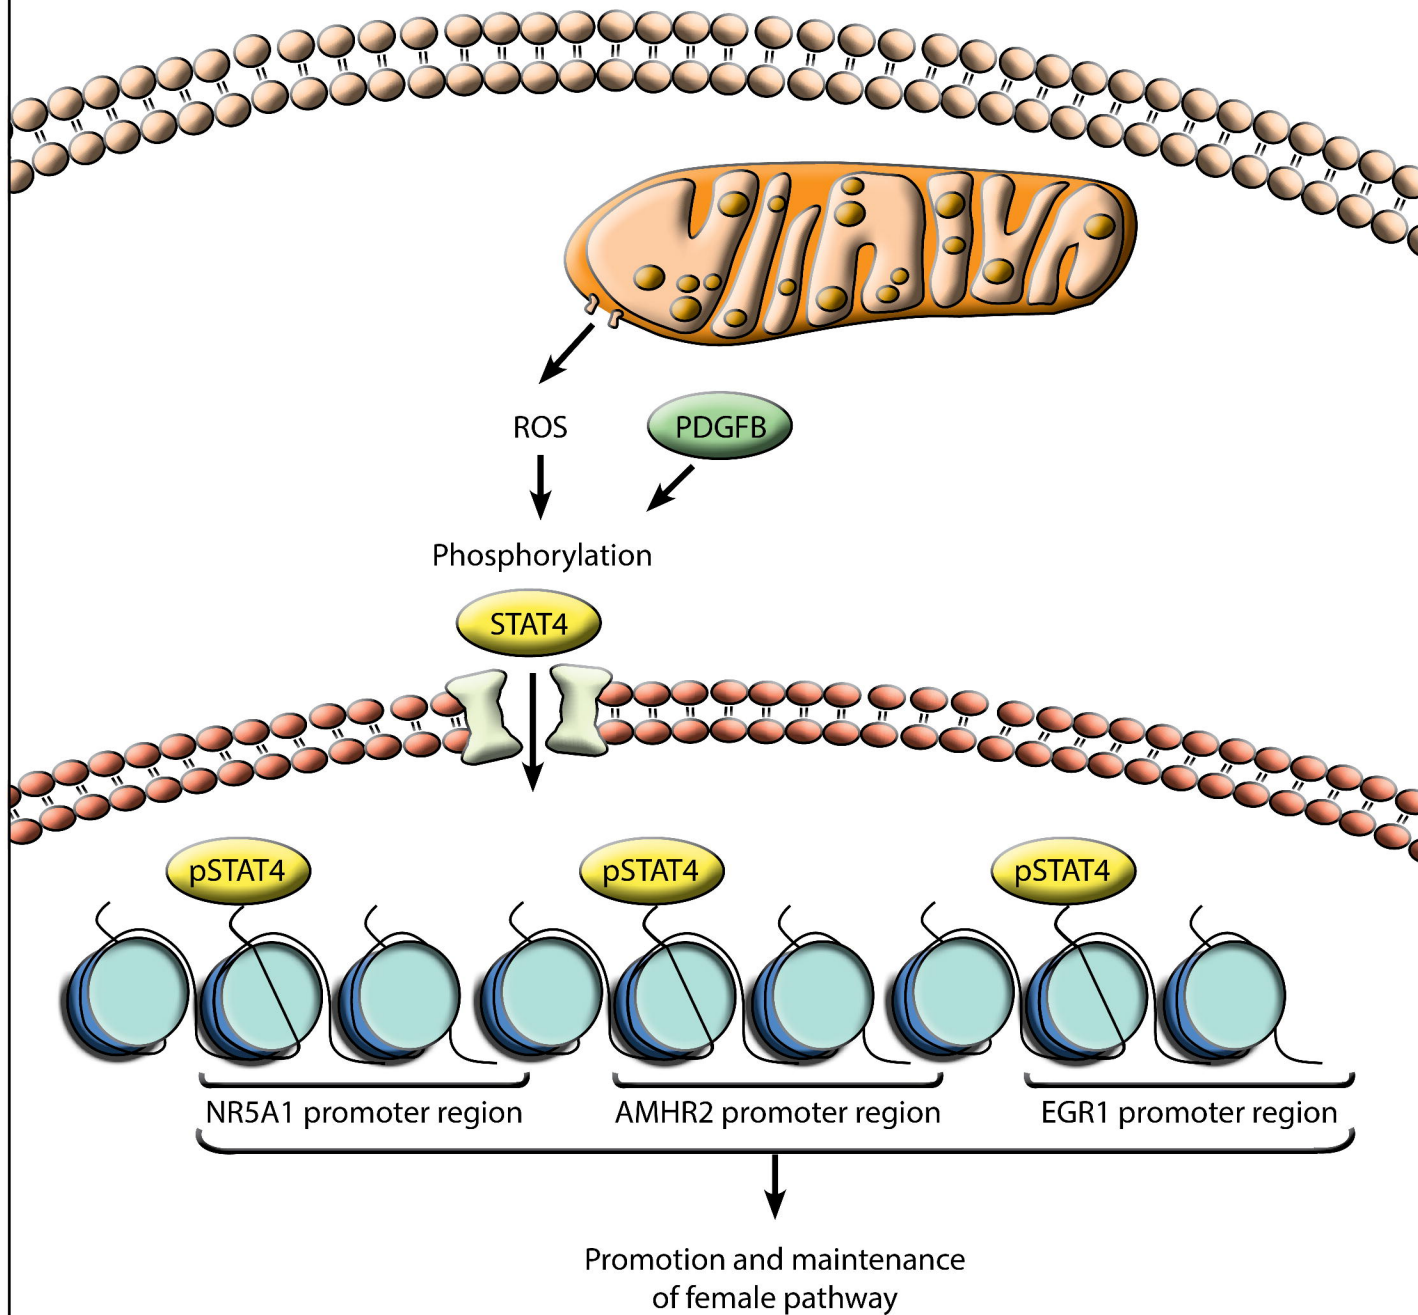**B**

| Gene ID | Gene Name                                          | Log FC | Log CPM | F     | P-value | FDR     |
|---------|----------------------------------------------------|--------|---------|-------|---------|---------|
| AMHR2   | Anti-Müllerian hormone receptor type 2             | -1.96  | 7.85    | 23.49 | 3.17E-5 | 1.56E-3 |
| EGR1    | Early growth response 1                            | -2.58  | 5.74    | 30.80 | 4.14E-6 | 4.05E-4 |
| NR5A1   | Nuclear receptor subfamily 5 group A member 1      | -1.30  | 7.87    | 15.21 | 4.69E-4 | 9.66E-3 |
| PDGFB   | Platelet derived growth factor subunit B           | -2.83  | 4.58    | 72.33 | 1.10E-9 | 2.35E-6 |
| STAT4   | Signal transducer and activator of transcription 4 | -1.36  | 3.57    | 16.94 | 2.56E-4 | 6.47E-3 |

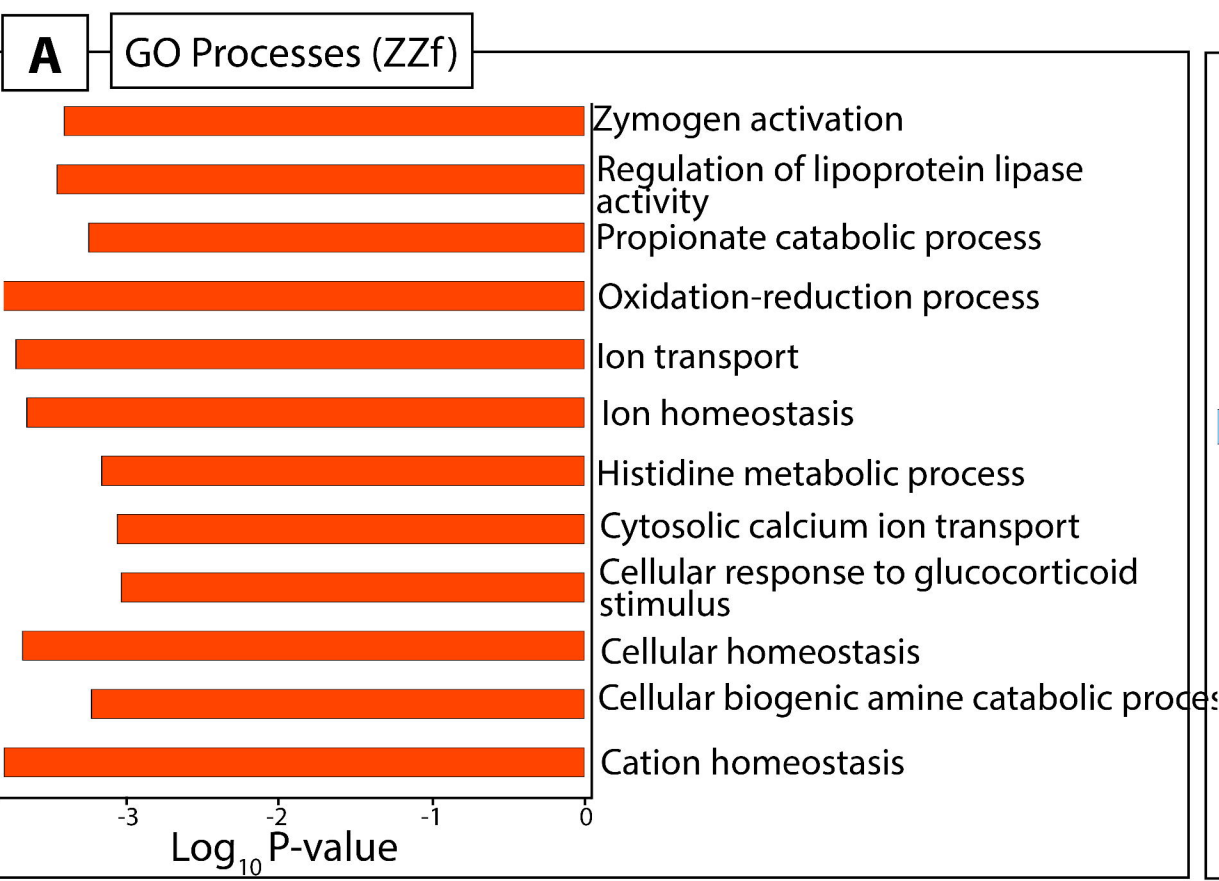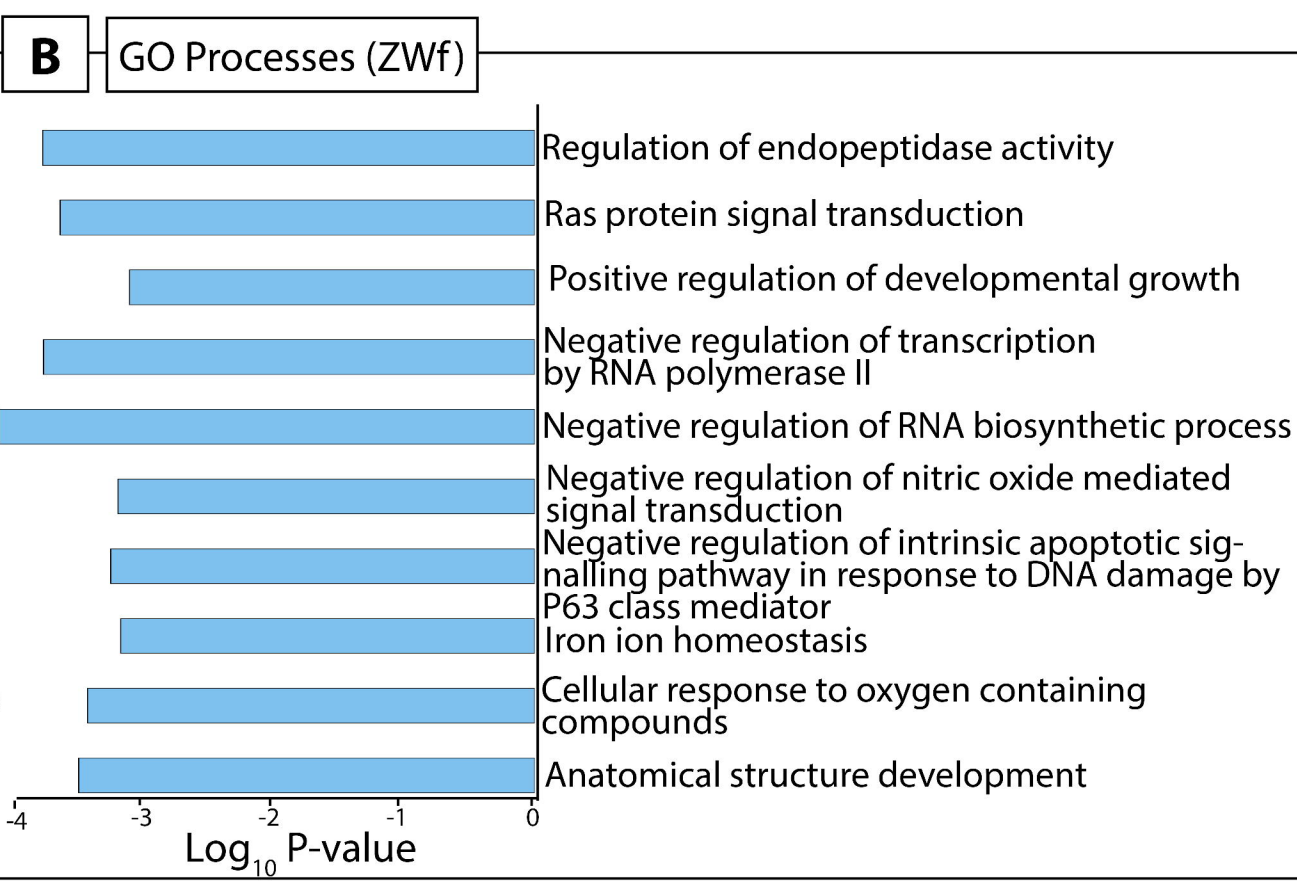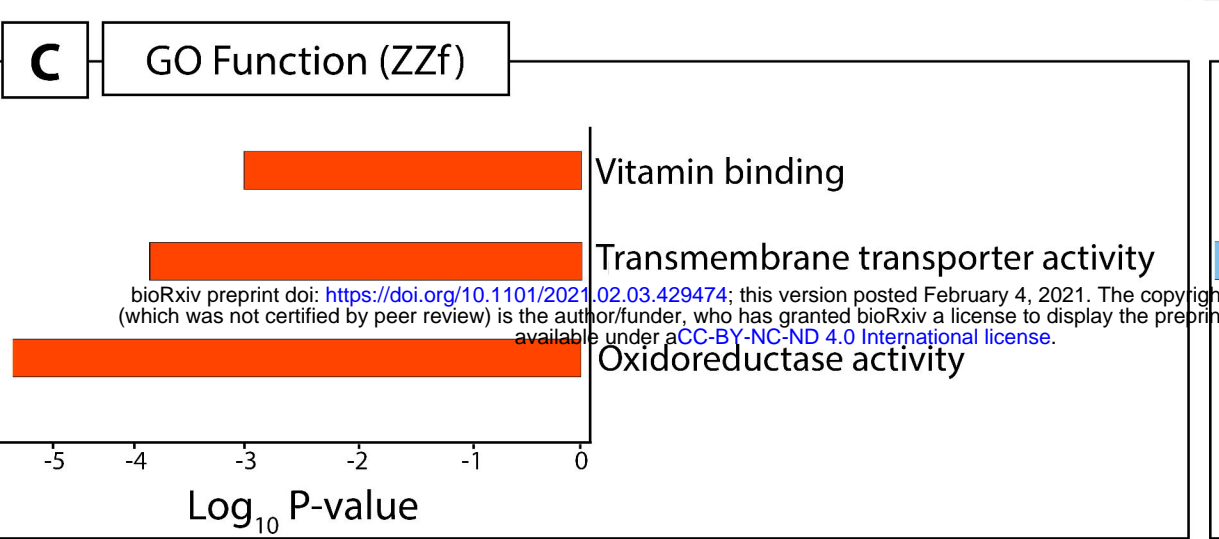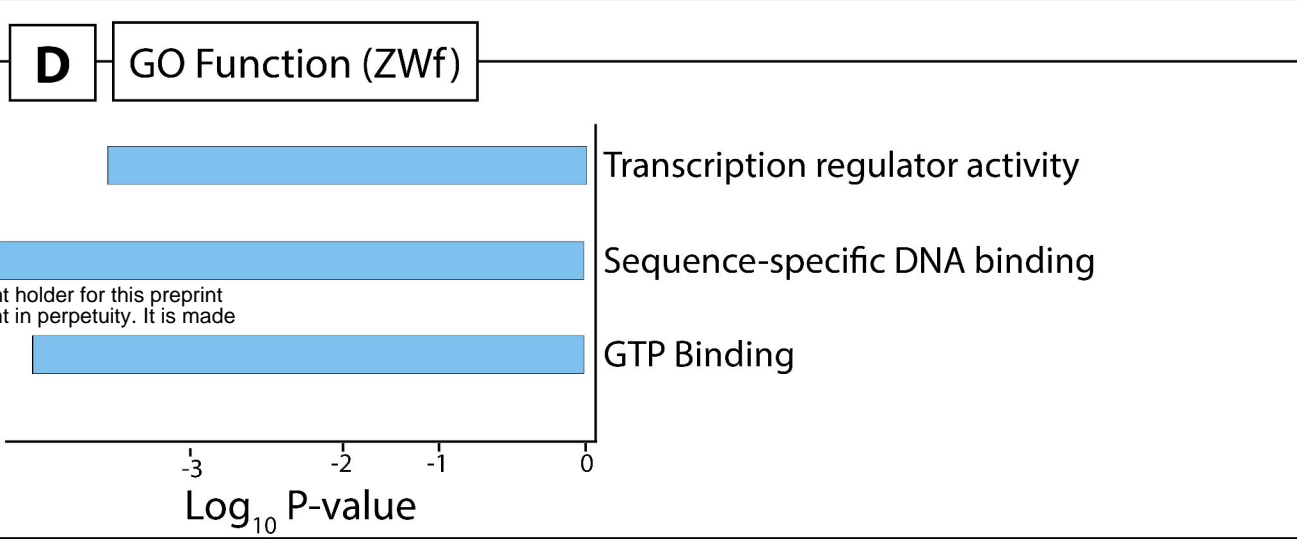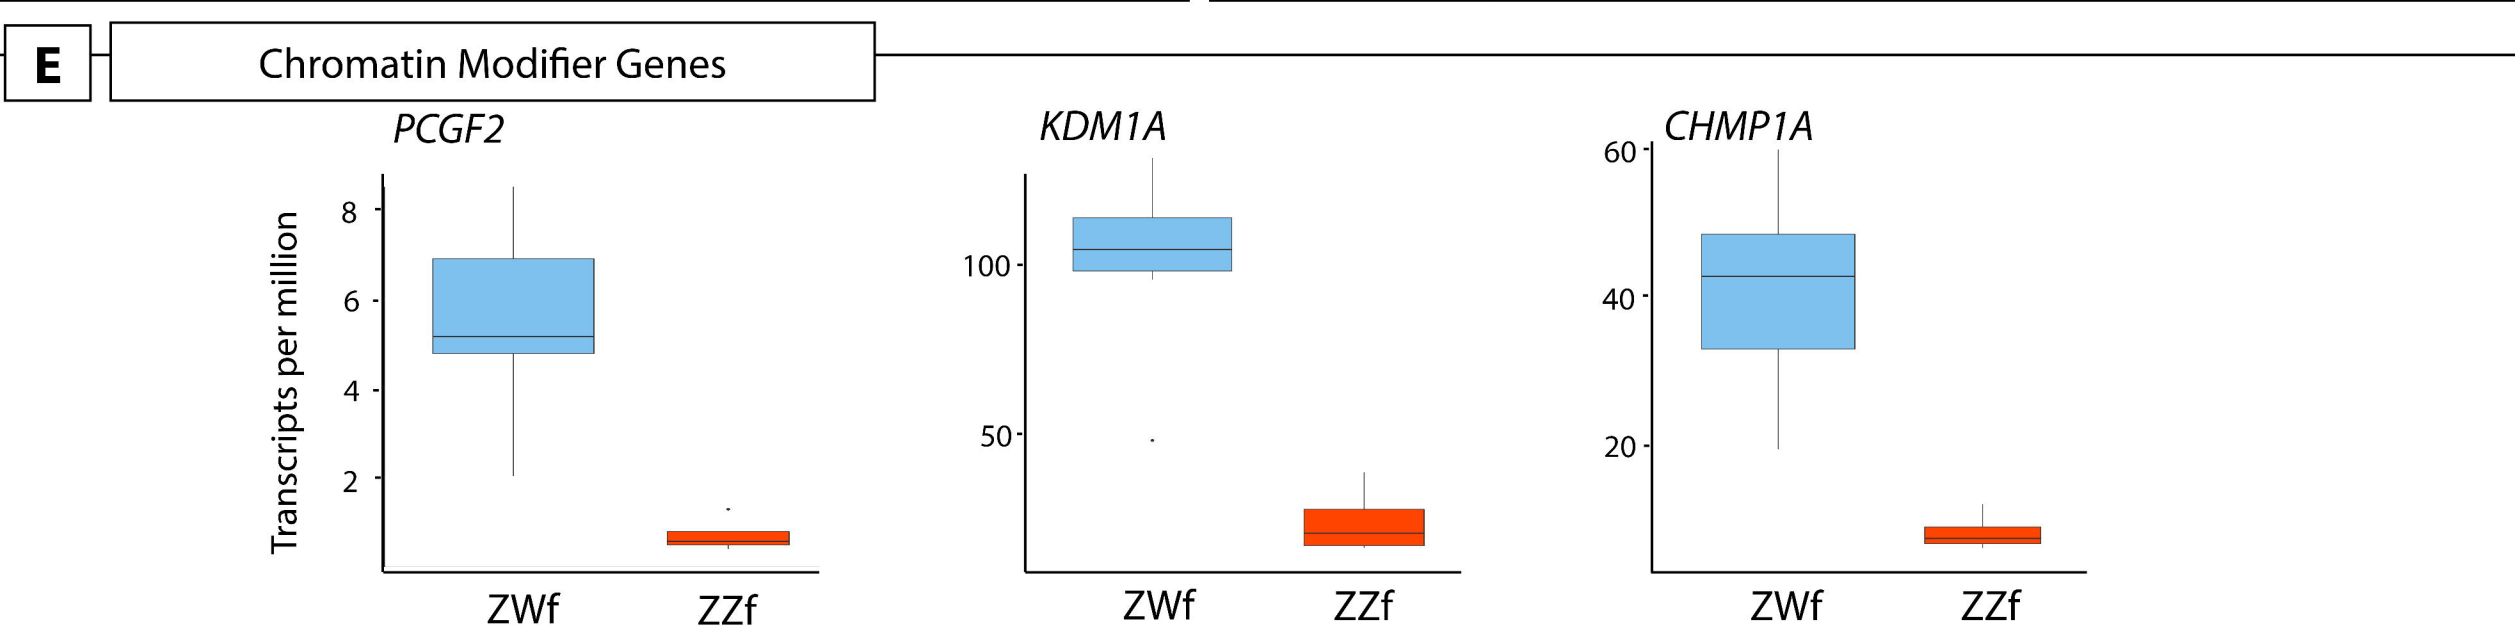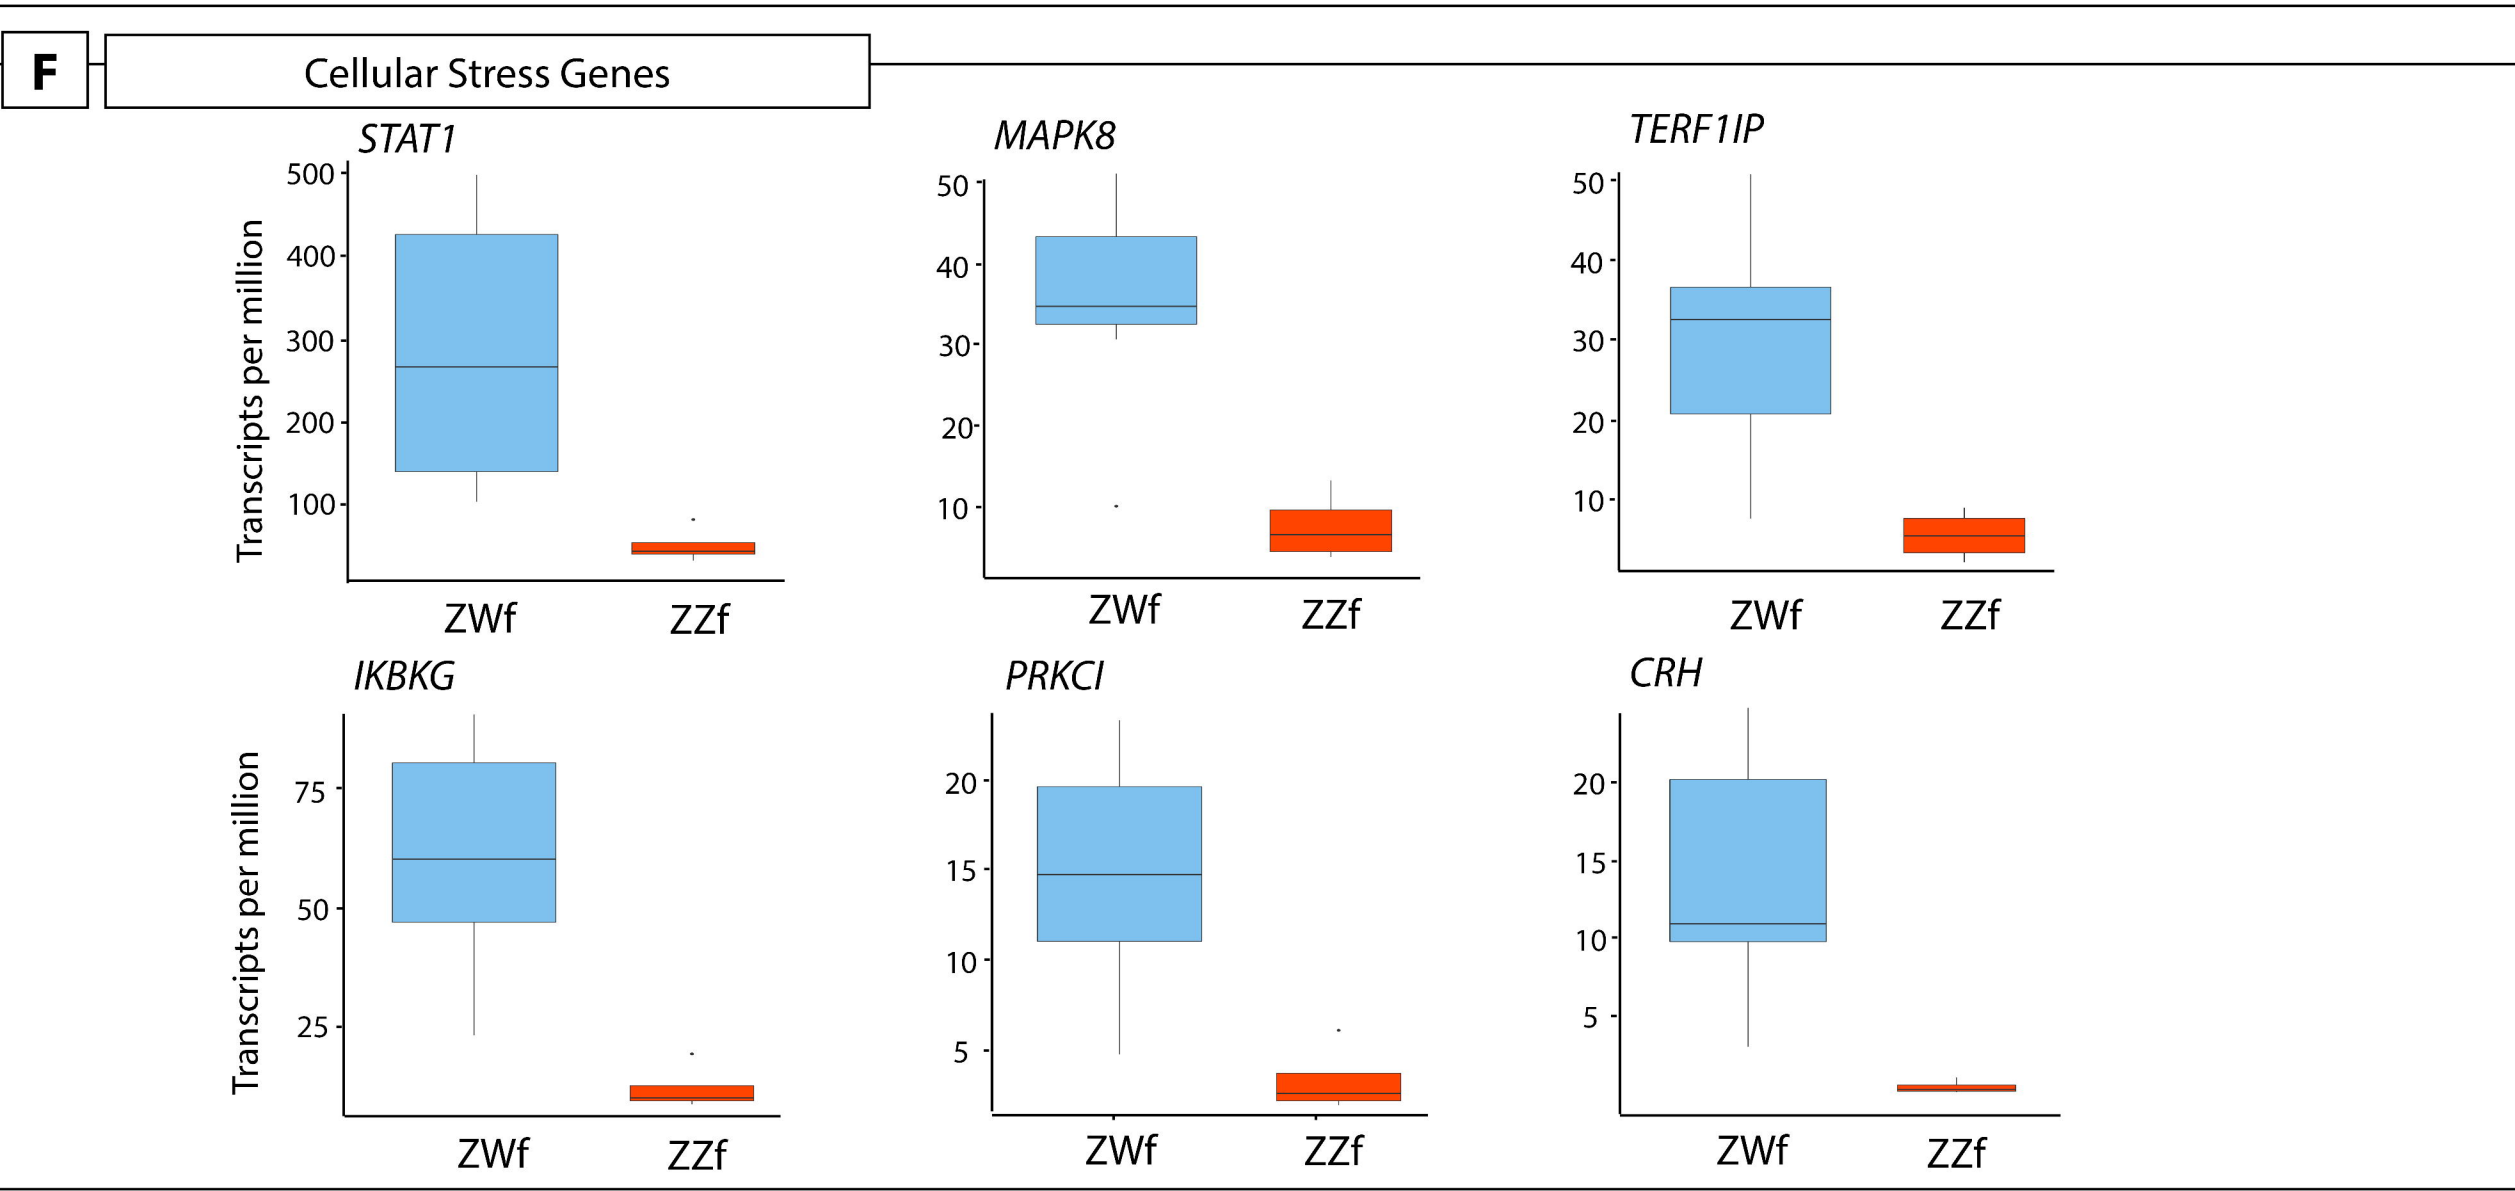



**A** ZZf clusters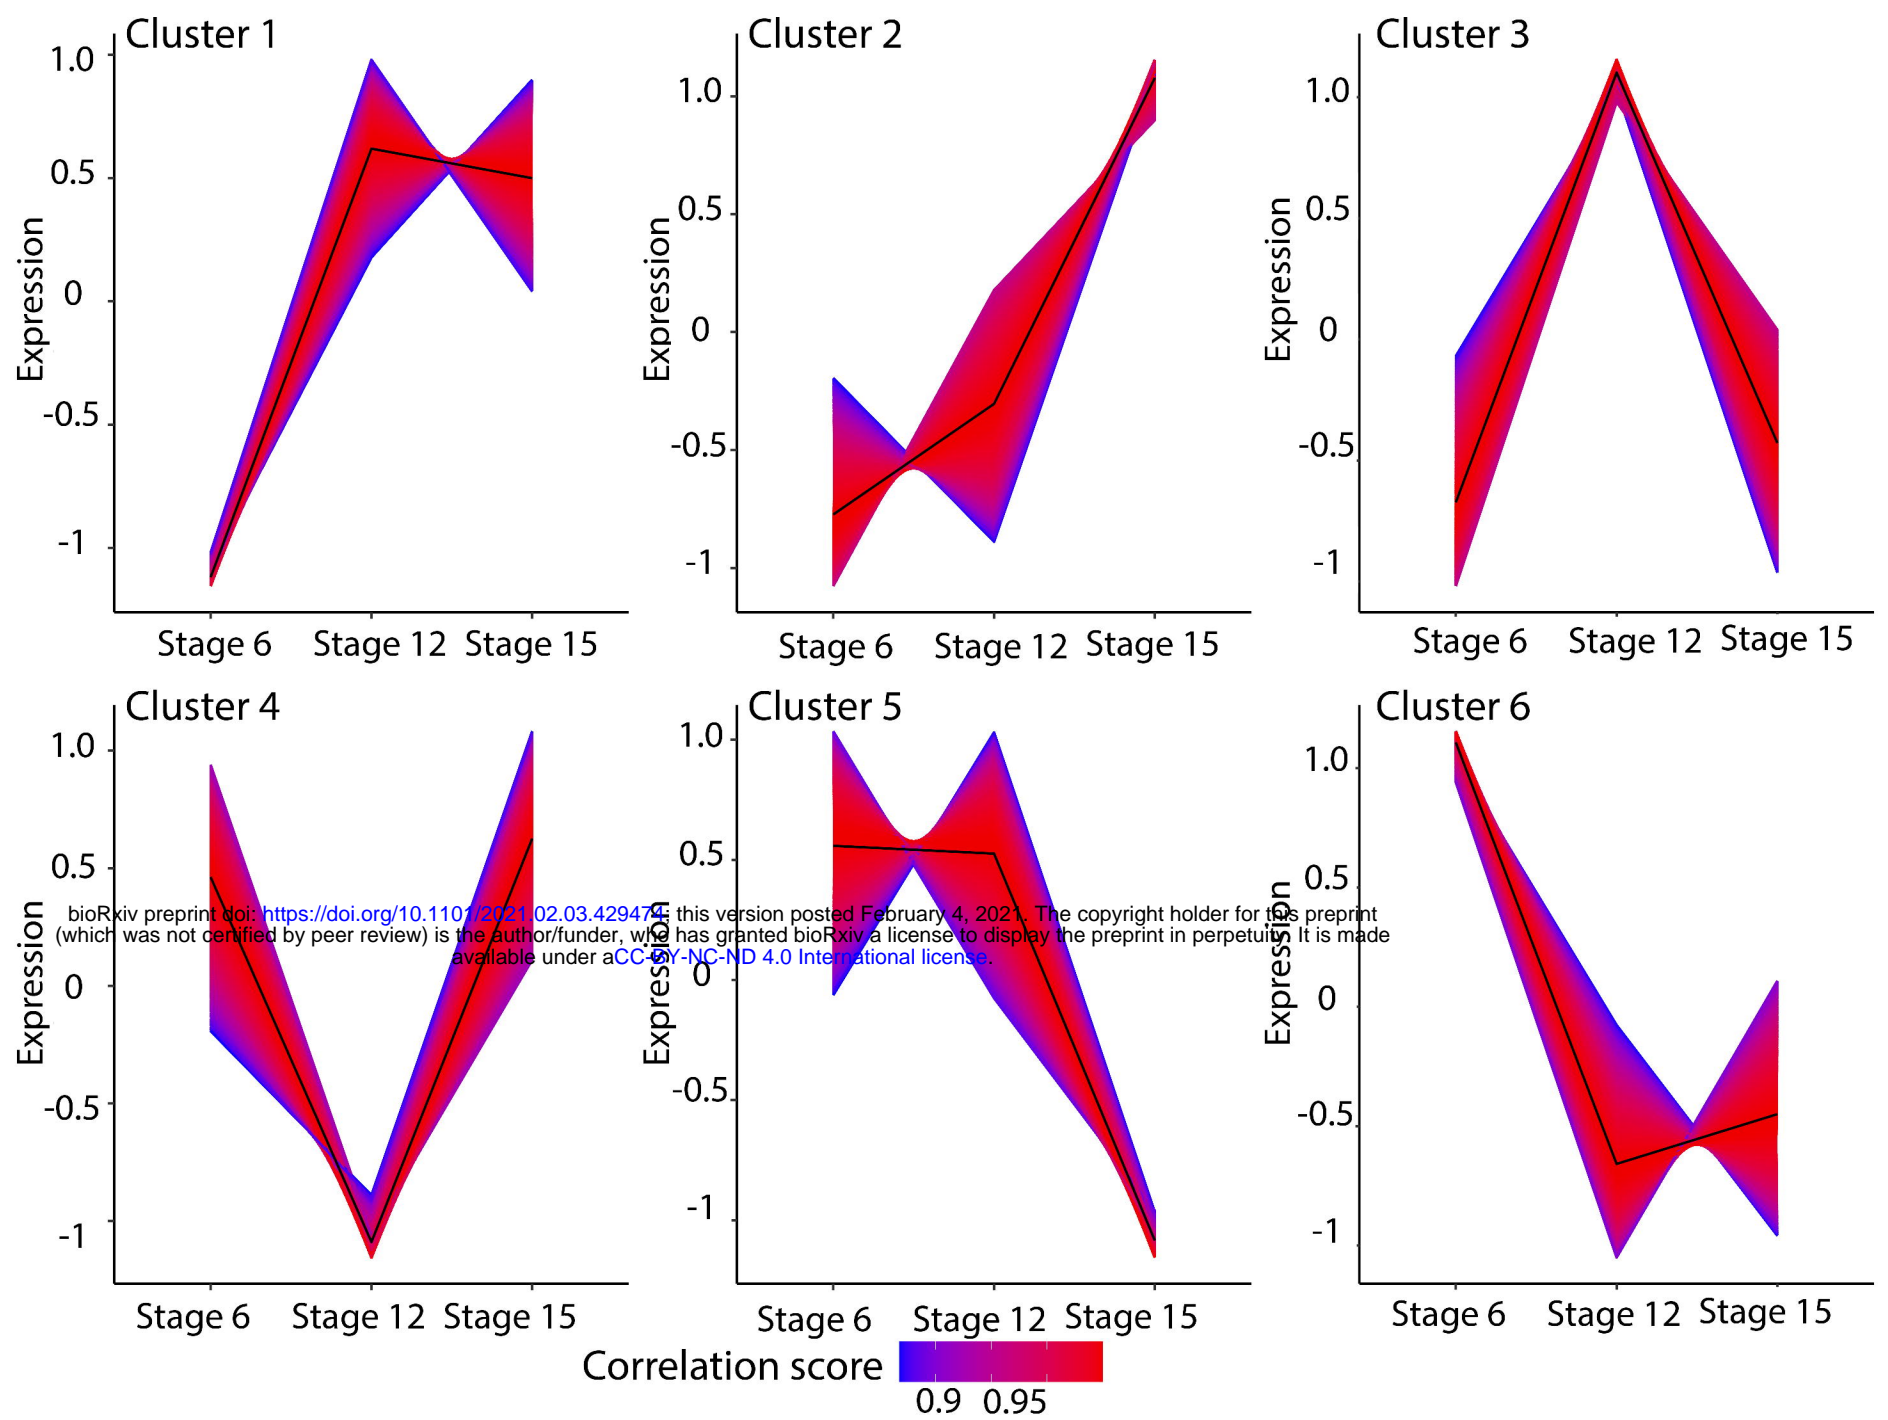**B** ZWf clusters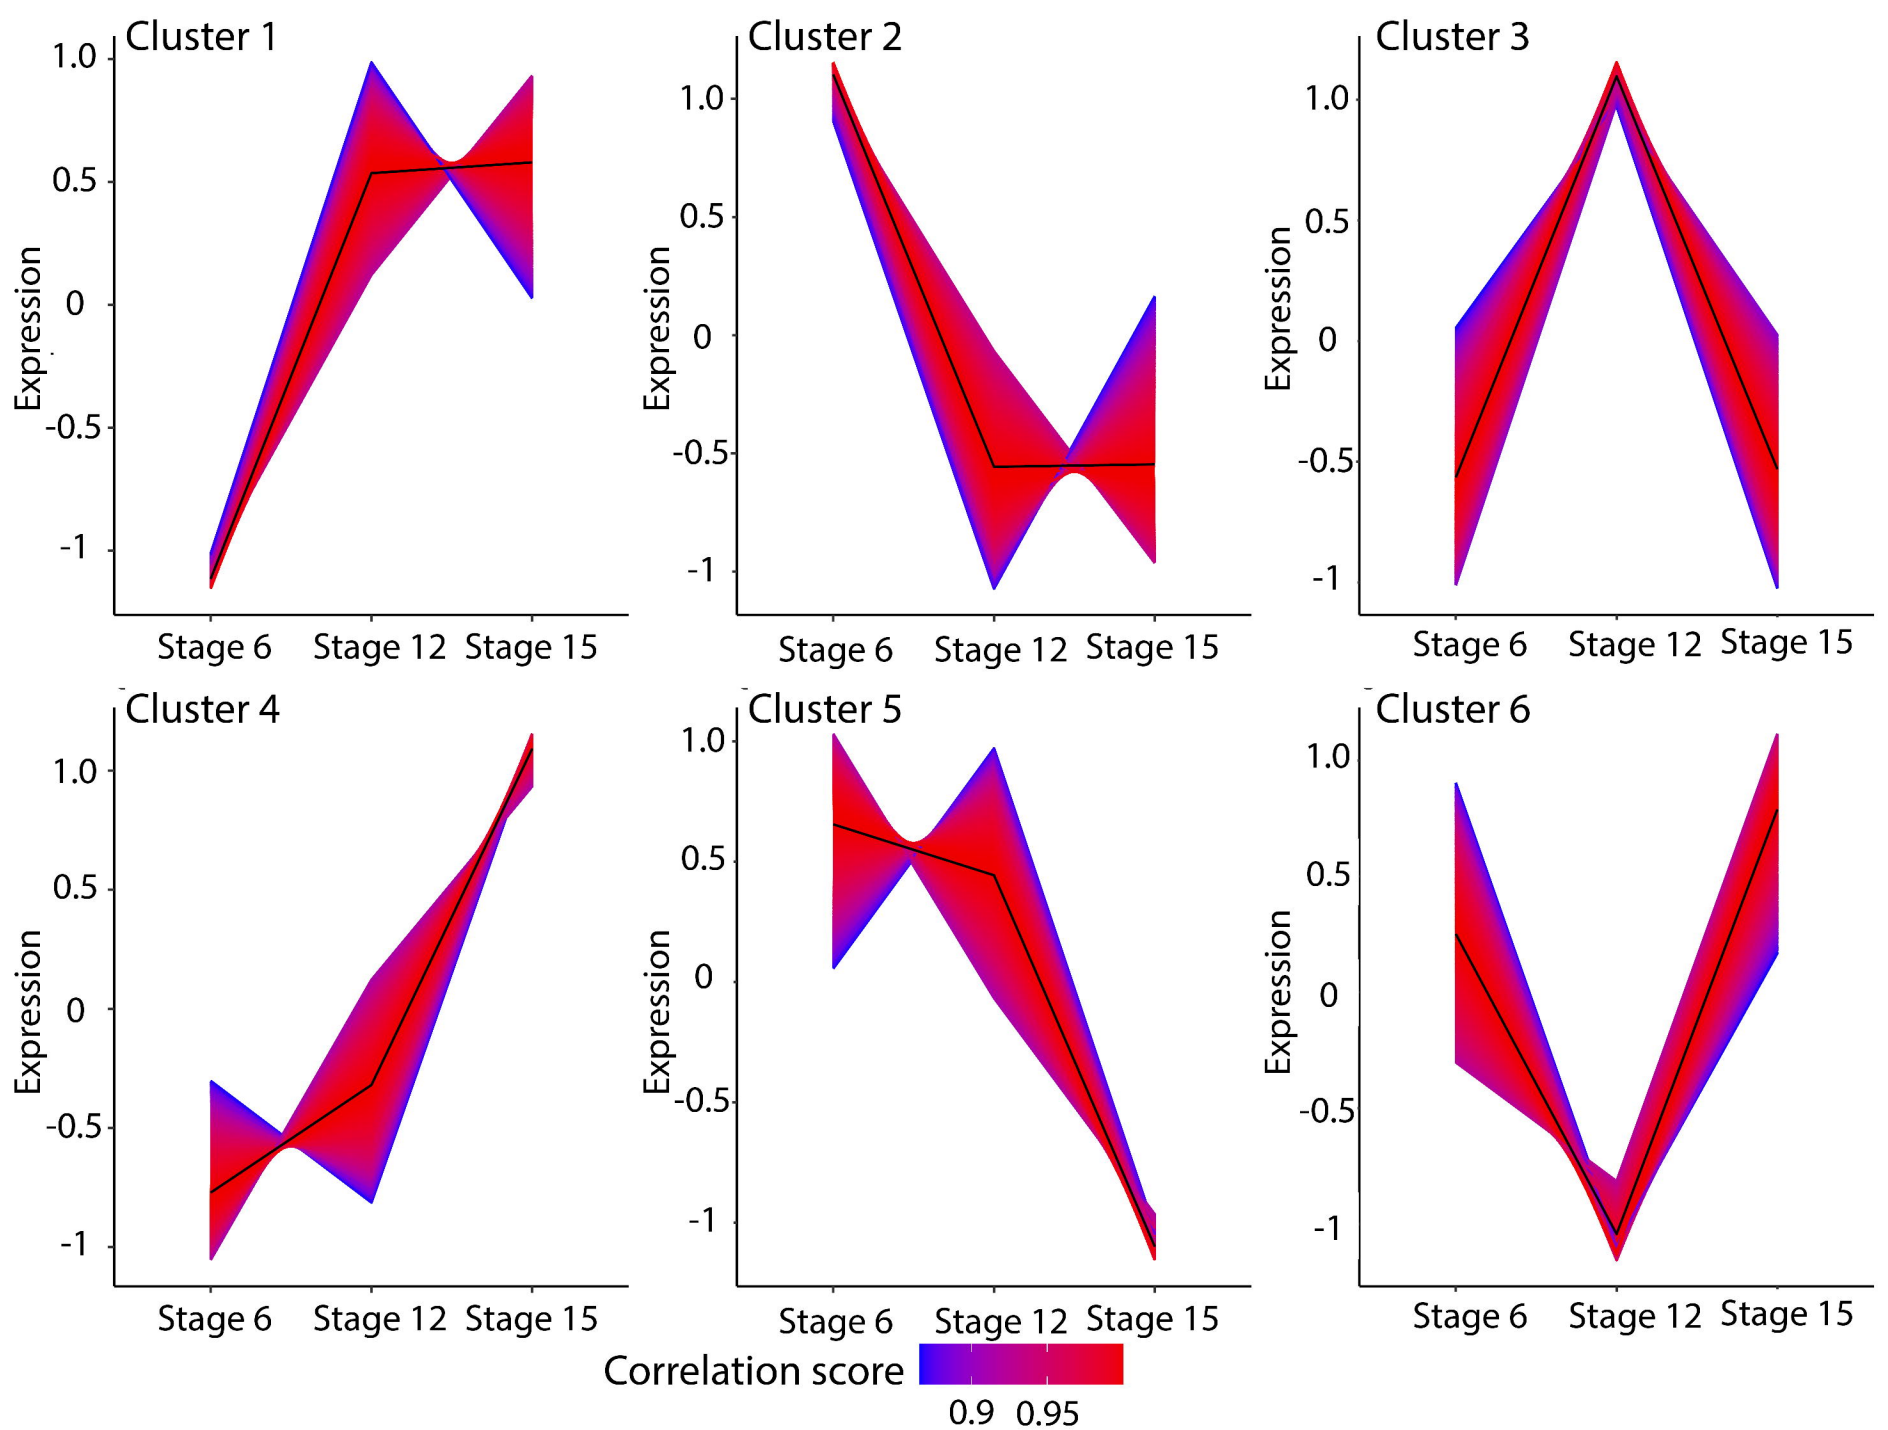

A

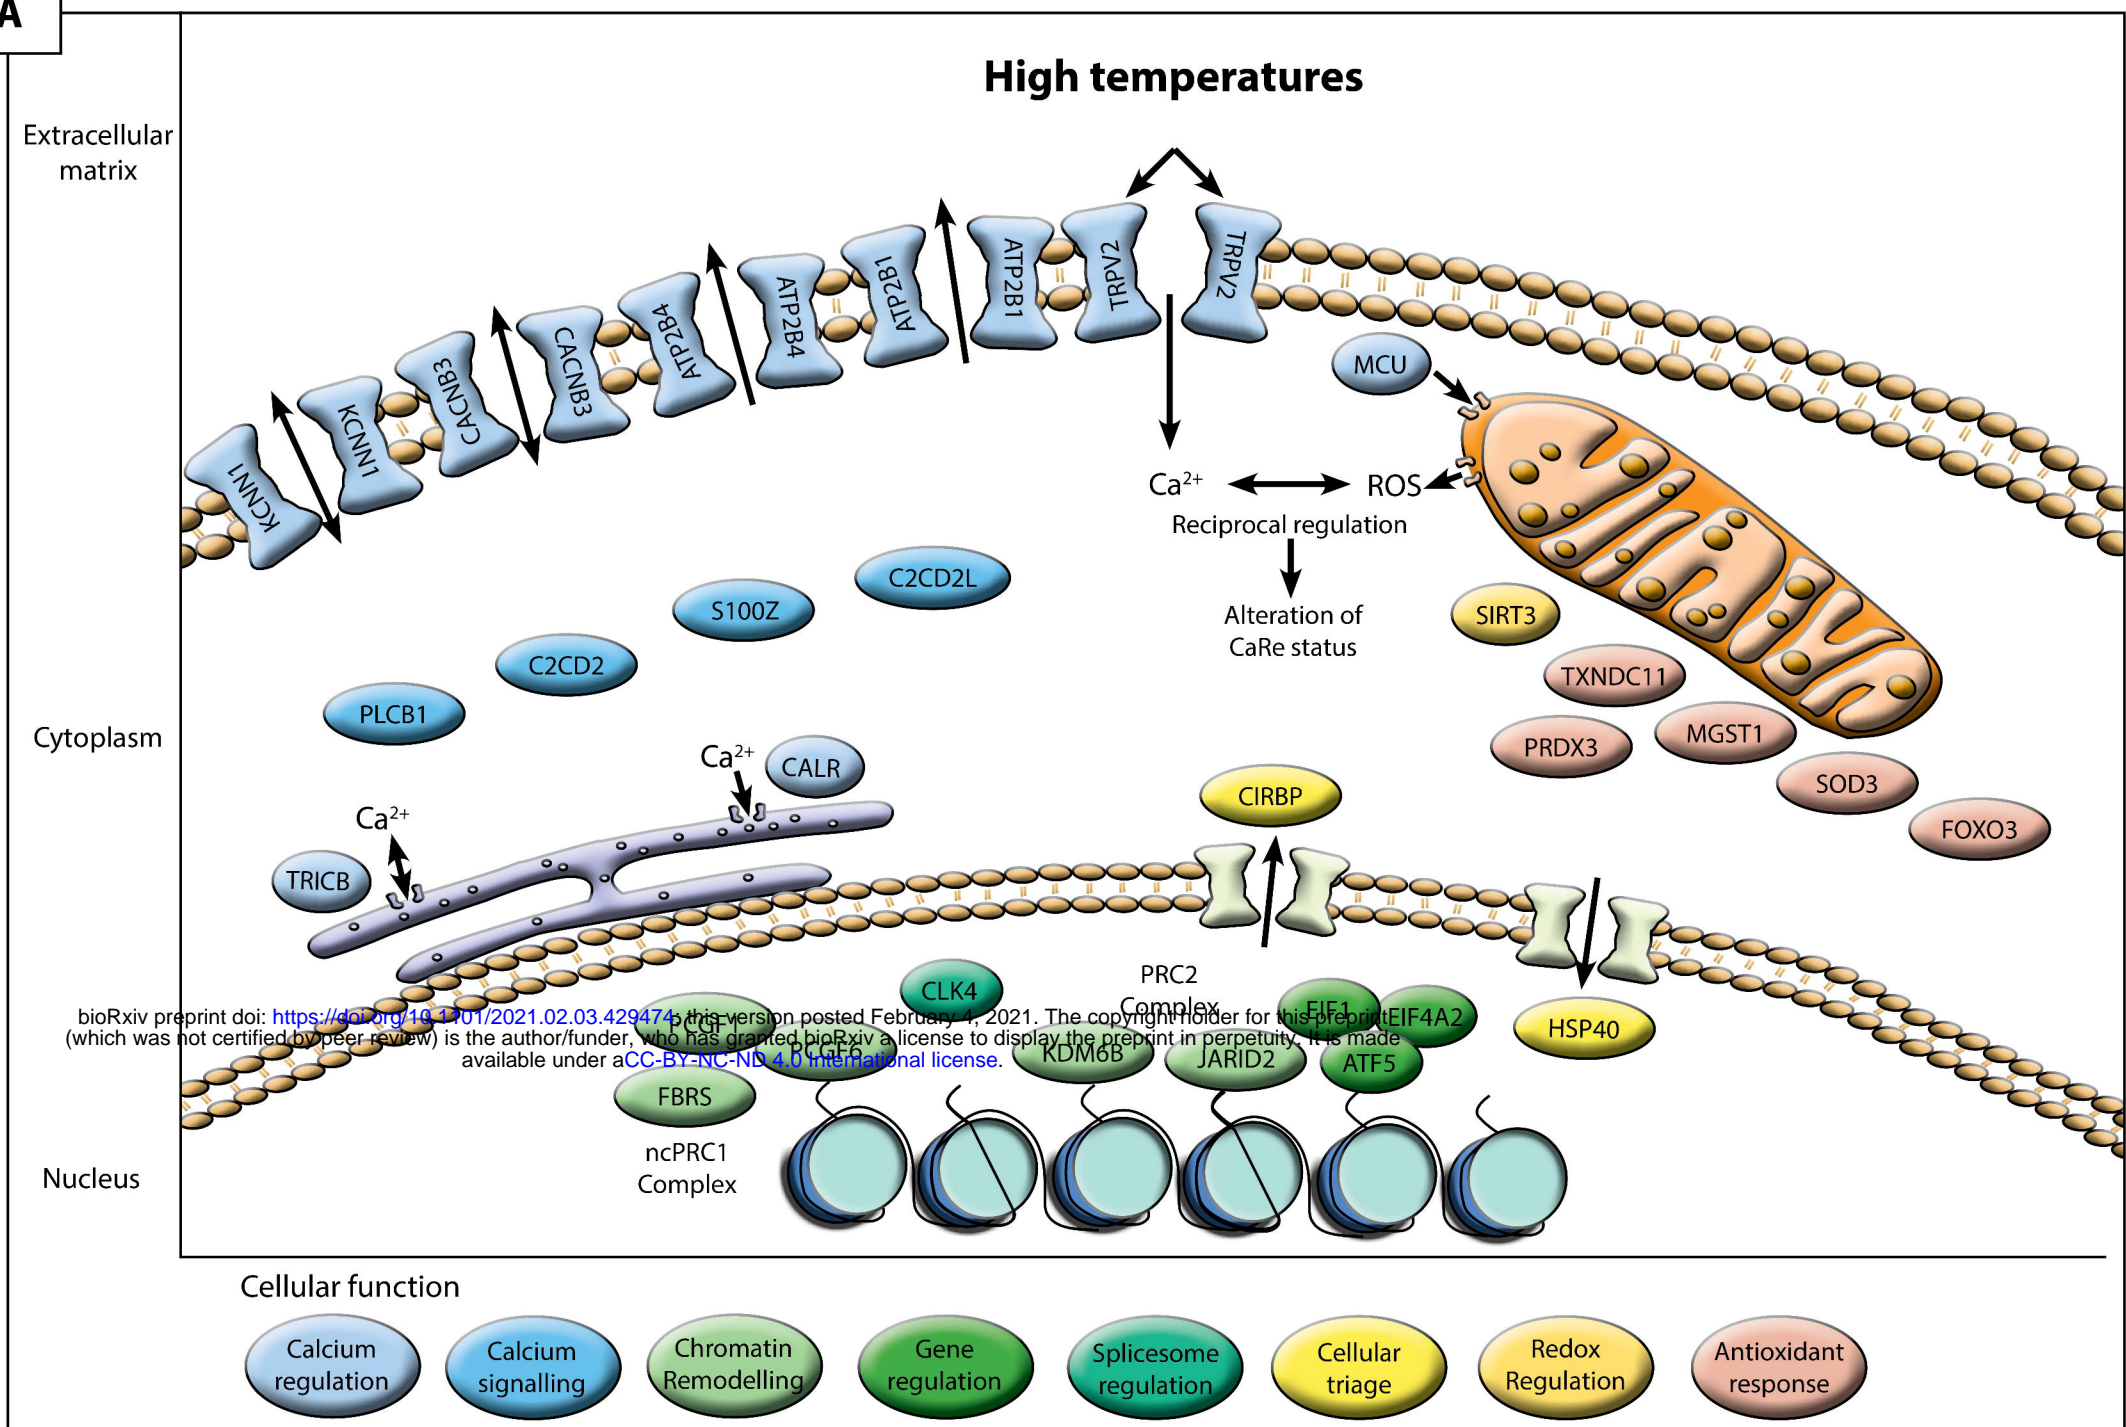

B

| Gene ID | Gene Name                                                        | logFC | logCPM | F       | P-Value  | FDR     |
|---------|------------------------------------------------------------------|-------|--------|---------|----------|---------|
| ATF5    | Activating transcription factor 5                                | 2.075 | 6.445  | 20.868  | 8.20E-5  | 3.42E-3 |
| ATP2B1  | ATPase plasma membrane Ca <sup>2+</sup> transporting 1           | 1.162 | 5.455  | 24.183  | 3.09E-5  | 2.13E-3 |
| ATP2B4  | ATPase plasma membrane Ca <sup>2+</sup> transporting 4           | 1.561 | 6.369  | 35.685  | 1.63E-6  | 4.31E-4 |
| C2CD2   | C2 calcium dependent domain containing 2                         | 1.320 | 4.706  | 26.474  | 1.64E-5  | 1.60E-3 |
| C2CD2L  | C2CD2 like                                                       | 1.330 | 3.288  | 17.857  | 2.12E-4  | 5.71E-3 |
| CACNB3  | Calcium voltage-gated channel auxiliary subunit beta 3           | 1.541 | 7.079  | 44.339  | 2.50E-7  | 1.69E-4 |
| CALR    | Calreticulin                                                     | 1.397 | 9.378  | 23.407  | 3.86E-5  | 2.37E-3 |
| CIRBP   | Cold inducible RNA binding protein                               | 1.166 | 9.763  | 41.691  | 4.32E-7  | 2.29E-4 |
| CLK4    | CDC like kinase 4                                                | 1.330 | 5.681  | 19.118  | 1.41E-4  | 4.47E-3 |
| DNAJC28 | DnaJ heat shock protein family (Hsp40) member C28                | 1.252 | 3.039  | 15.643  | 4.44E-4  | 8.72E-3 |
| EIF1    | Eukaryotic translation initiation factor 1                       | 1.176 | 8.435  | 17.443  | 2.43E-4  | 6.11E-3 |
| EIF4A2  | Eukaryotic translation initiation factor 4A2                     | 1.168 | 8.158  | 59.491  | 1.53E-8  | 2.87E-5 |
| FBR5    | Fibrosin                                                         | 1.153 | 8.243  | 30.247  | 6.08E-6  | 8.95E-4 |
| FOXO3   | Forkhead box O3                                                  | 1.129 | 5.798  | 18.598  | 1.67E-4  | 4.88E-3 |
| JARID2  | Jumonji and AT-rich interaction domain containing 2              | 2.296 | 8.620  | 40.274  | 5.85E-7  | 2.57E-4 |
| KCNN1   | Potassium calcium-activated channel subfamily N member 1         | 1.164 | 5.594  | 15.939  | 4.01E-4  | 8.21E-3 |
| KDM6B   | Lysine demethylase 6B                                            | 3.503 | 9.291  | 120.703 | 6.40E-12 | 1.08E-7 |
| MCU     | Mitochondrial calcium uniporter                                  | 1.018 | 5.466  | 26.624  | 1.57E-5  | 1.56E-3 |
| MGST1   | Microsomal glutathione S-transferase 1                           | 1.351 | 7.830  | 29.858  | 6.71E-6  | 9.47E-4 |
| PCGF1   | Polycomb group ring finger 1                                     | 1.408 | 5.170  | 19.275  | 1.34E-4  | 4.42E-3 |
| PCGF6   | Polycomb group ring finger 6                                     | 1.072 | 4.330  | 19.318  | 1.33E-4  | 4.39E-3 |
| PLCB1   | Phospholipase C beta 1                                           | 1.763 | 3.649  | 24.040  | 3.22E-5  | 2.17E-3 |
| PRDX3   | Peroxiredoxin 3                                                  | 1.336 | 7.212  | 29.894  | 6.65E-6  | 9.46E-4 |
| S100Z   | S100 calcium binding protein Z                                   | 4.202 | 3.813  | 23.471  | 3.79E-5  | 2.37E-3 |
| SIRT3   | Sirtuin 3                                                        | 1.264 | 2.359  | 18.039  | 2.00E-4  | 5.52E-3 |
| SOD3    | Superoxide dismutase 3                                           | 2.317 | 1.806  | 17.239  | 2.59E-4  | 6.33E-3 |
| TMEM38B | Transmembrane protein 38B                                        | 1.437 | 3.311  | 26.252  | 1.74E-5  | 1.62E-3 |
| TRPV2   | Transient receptor potential cation channel subfamily V member 2 | 3.239 | 3.951  | 45.162  | 2.12E-7  | 1.49E-4 |
| TXNDC11 | Thioredoxin domain containing 11                                 | 1.024 | 6.160  | 23.816  | 3.43E-5  | 2.26E-3 |

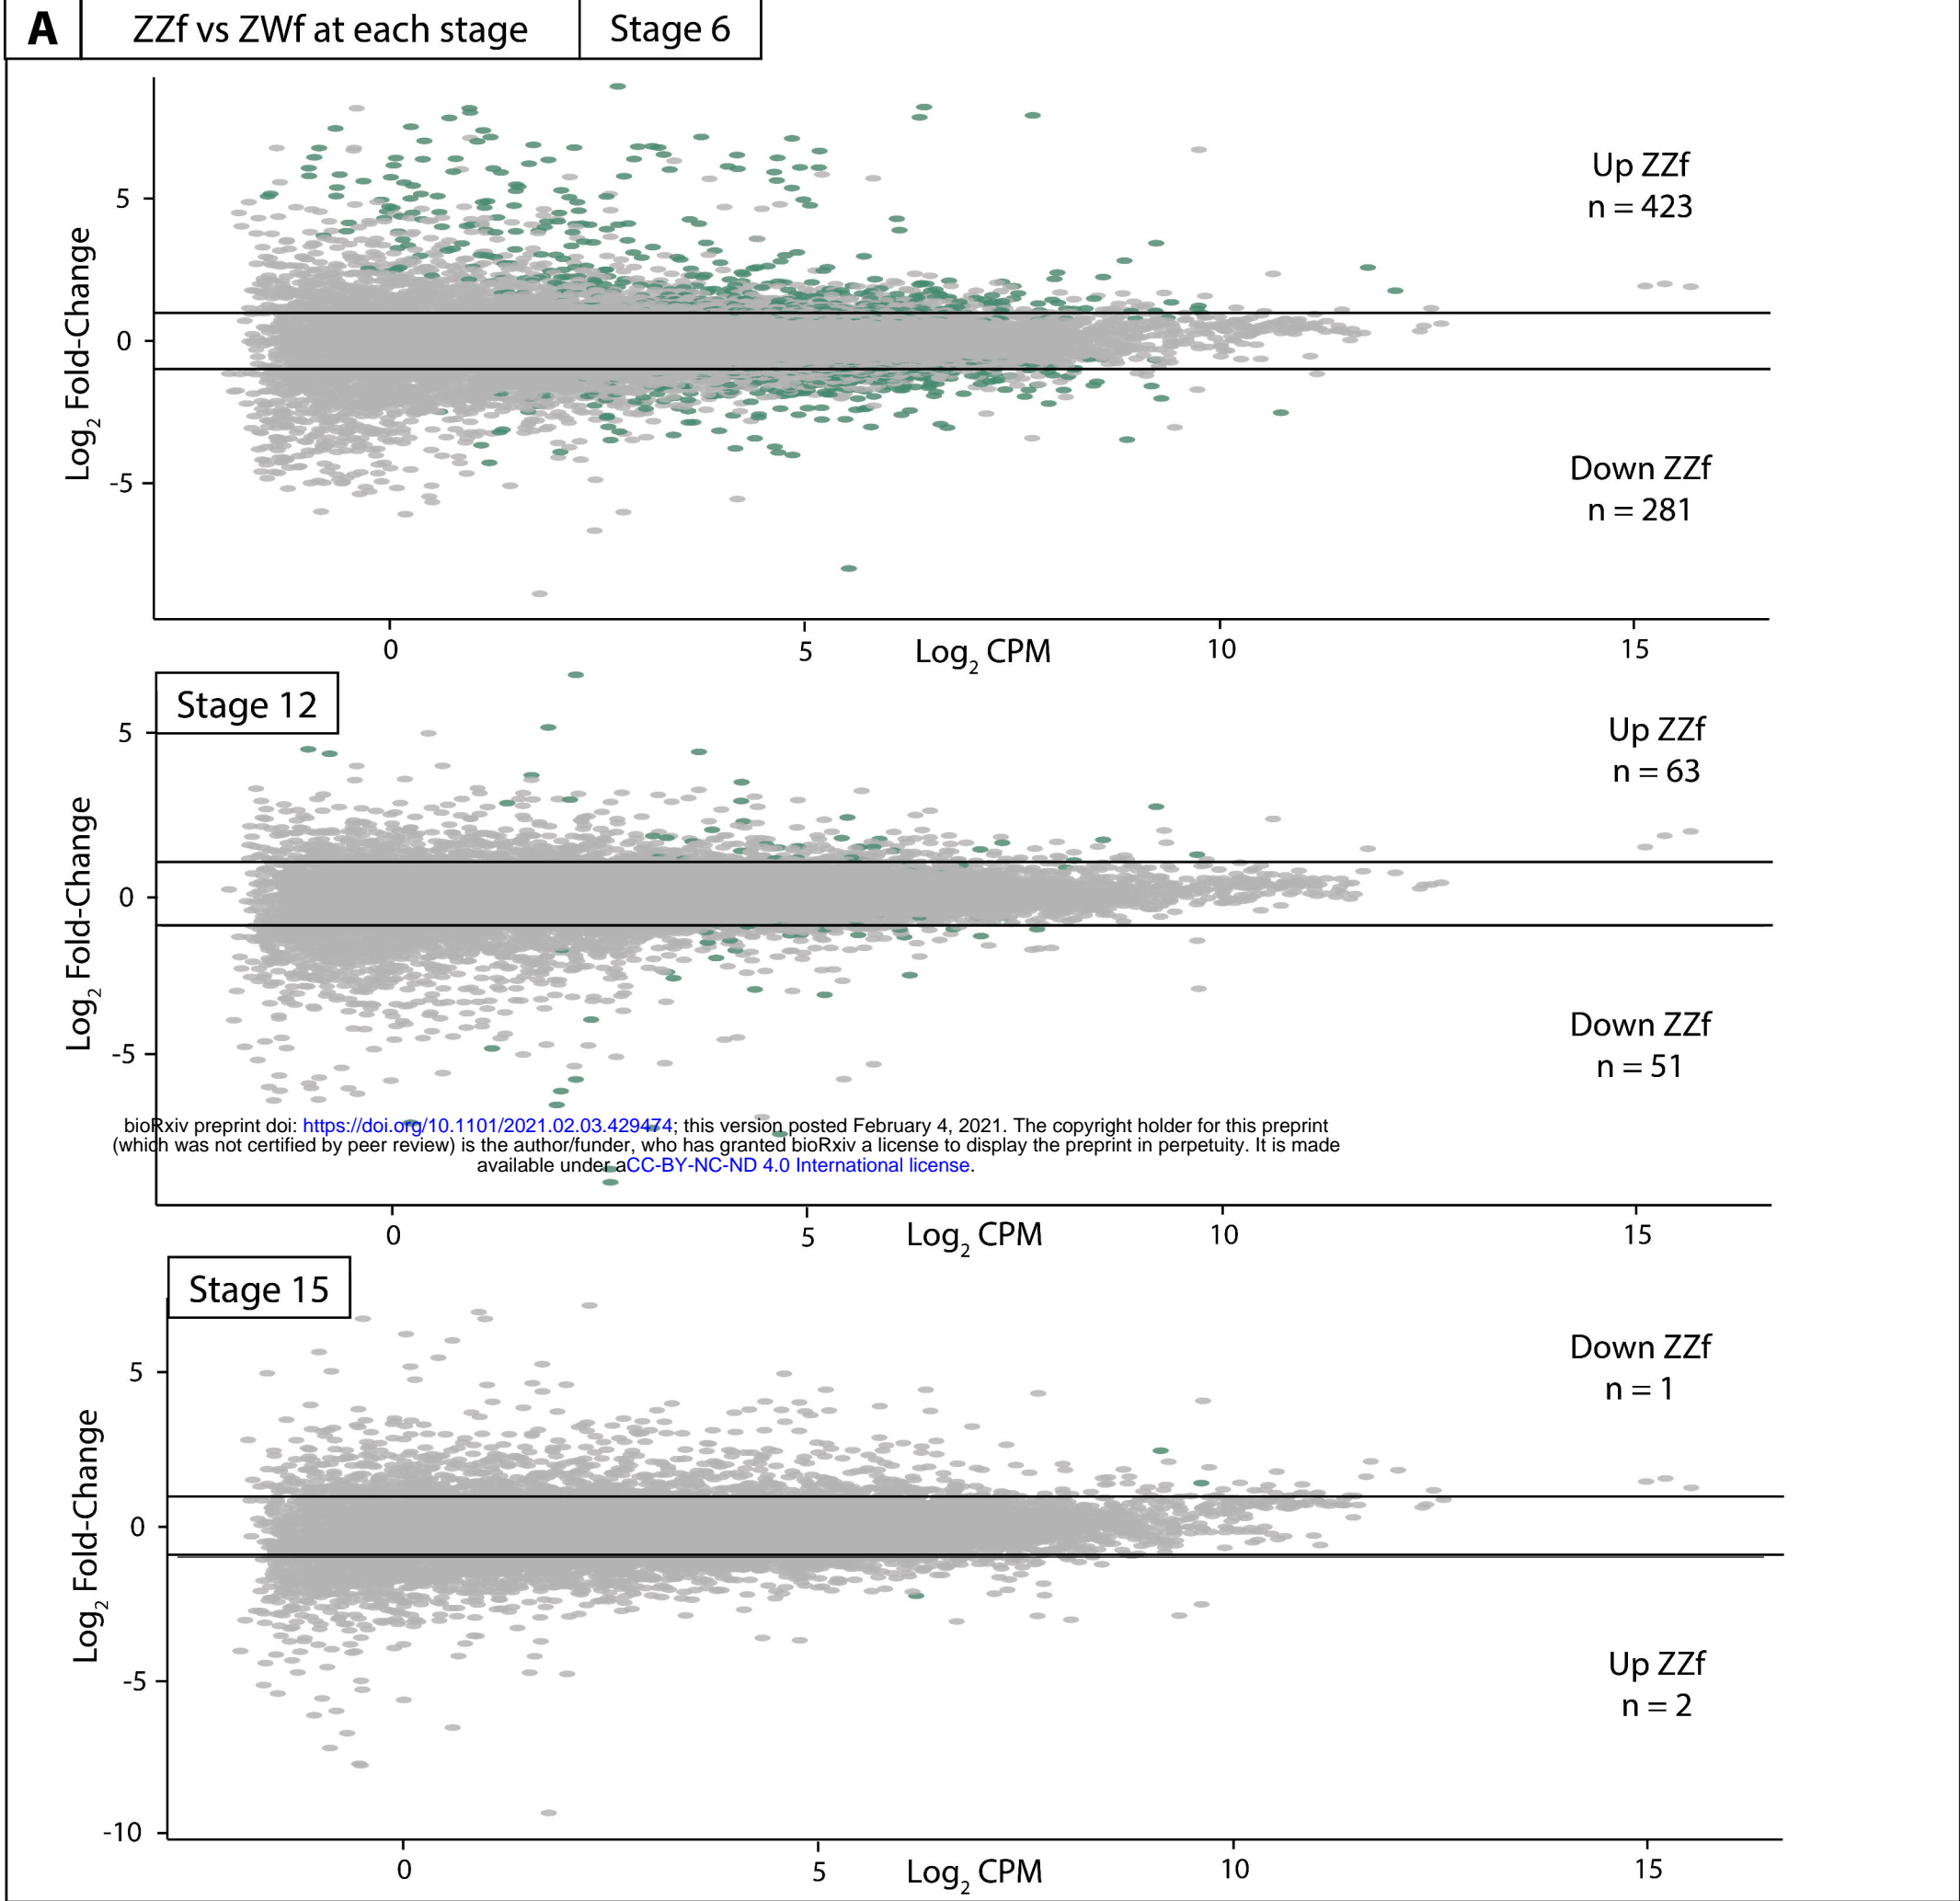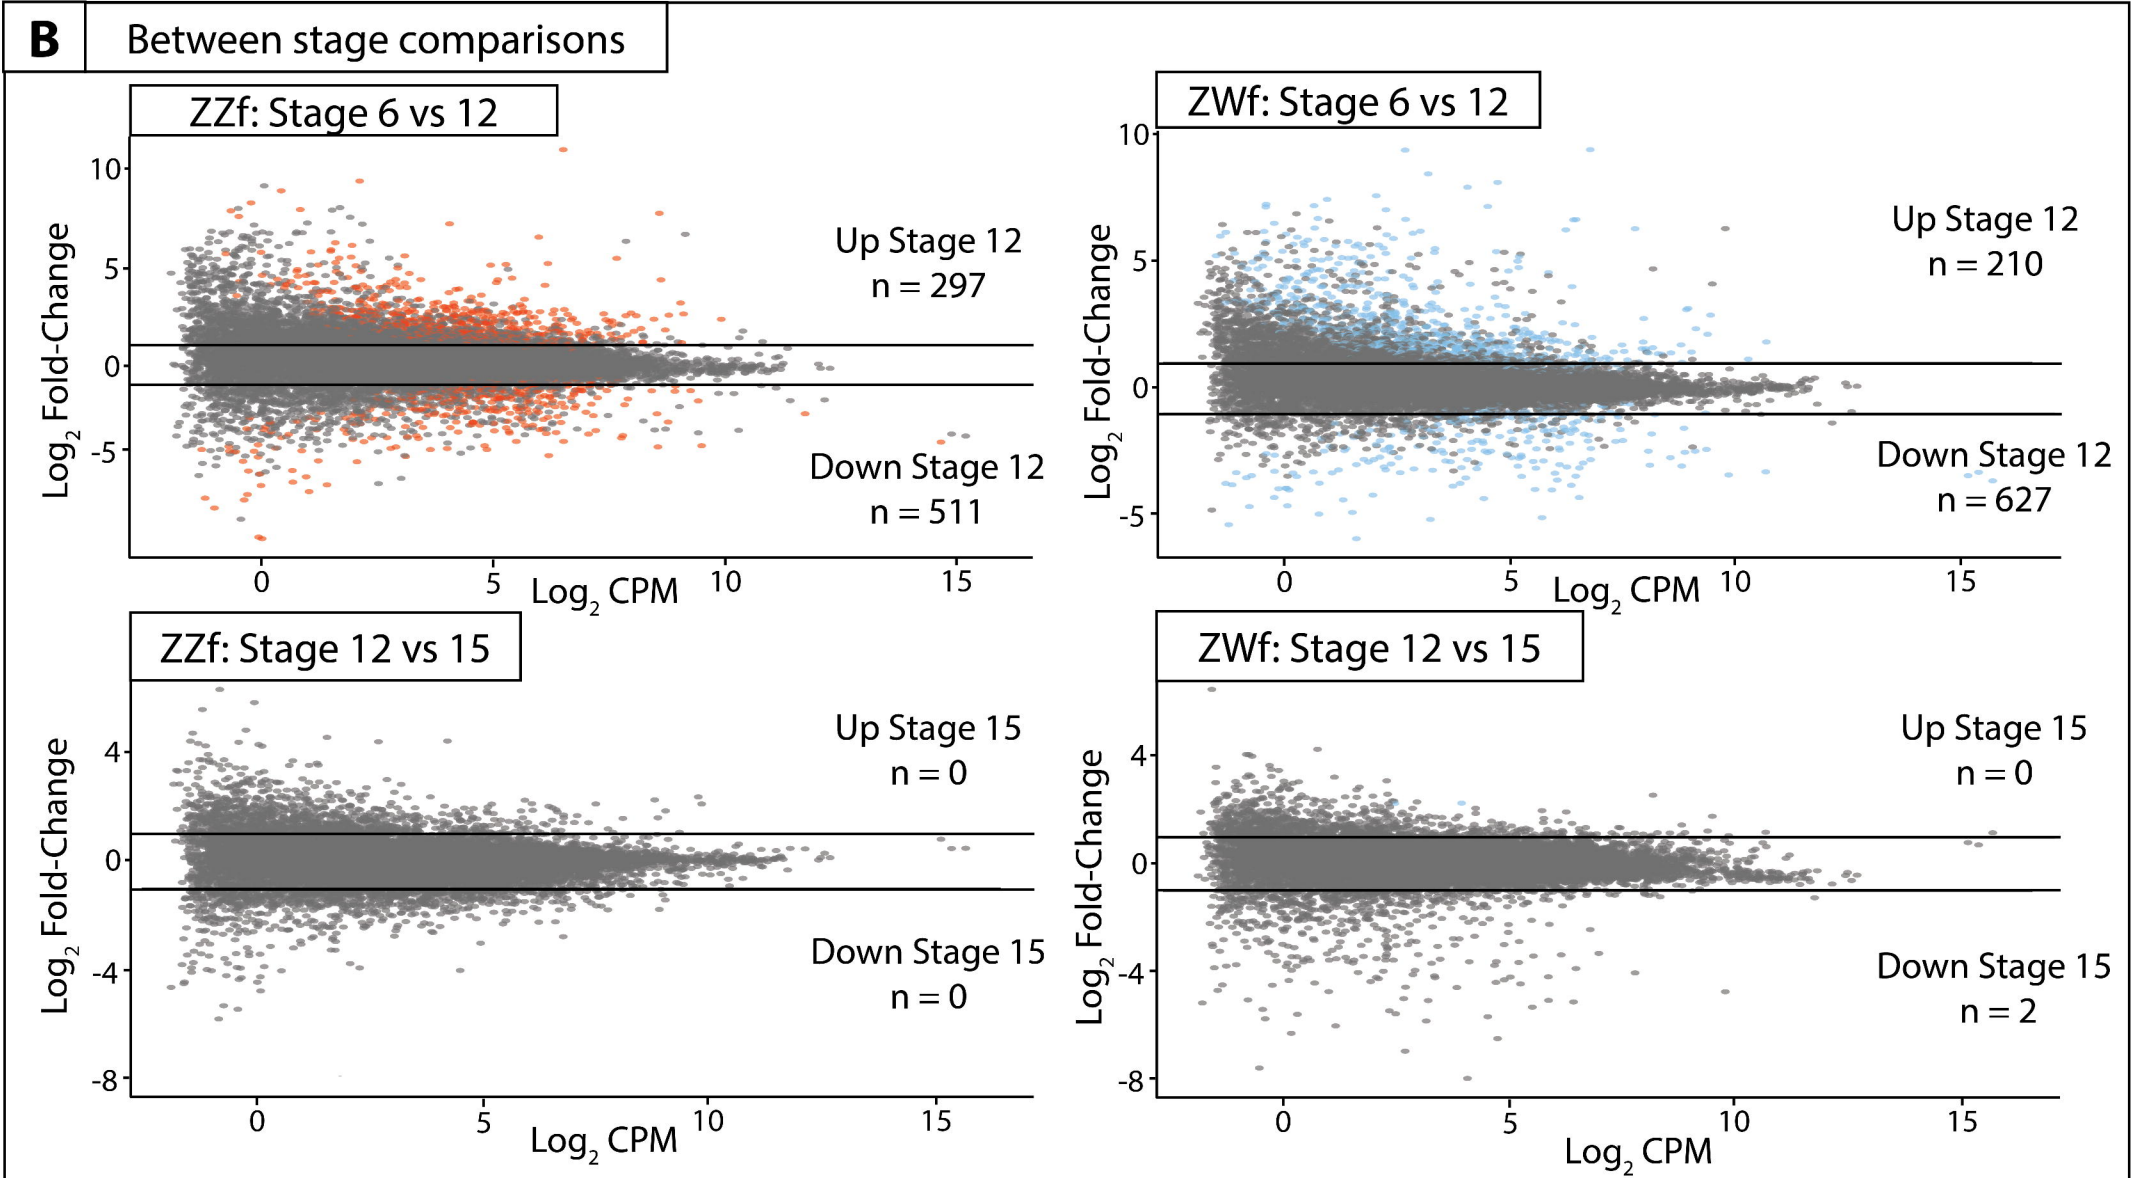

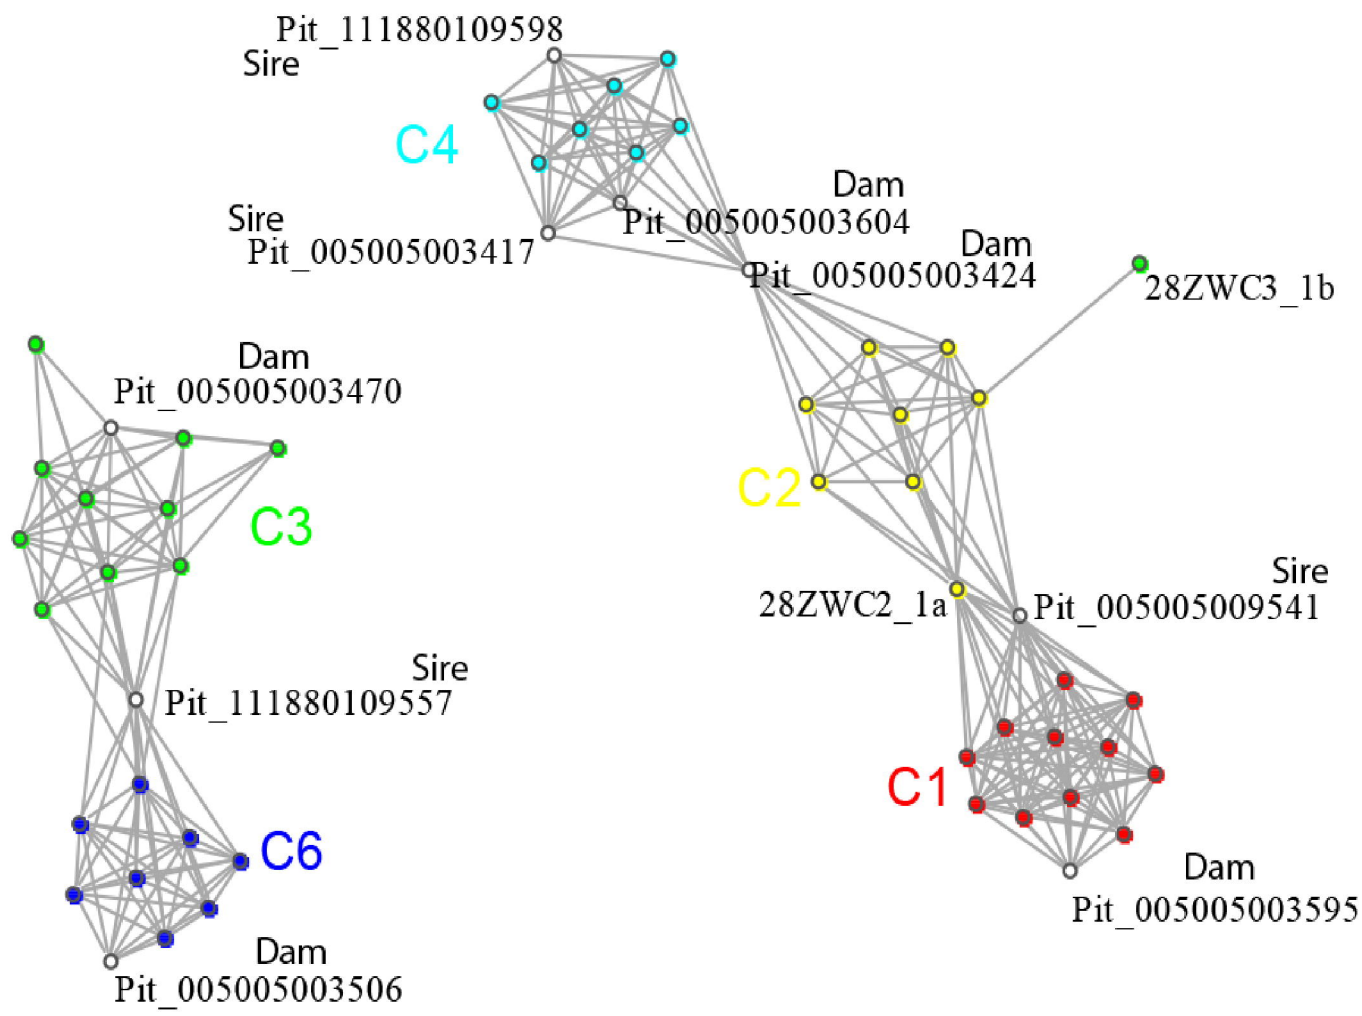

**A****Female Gene Panel**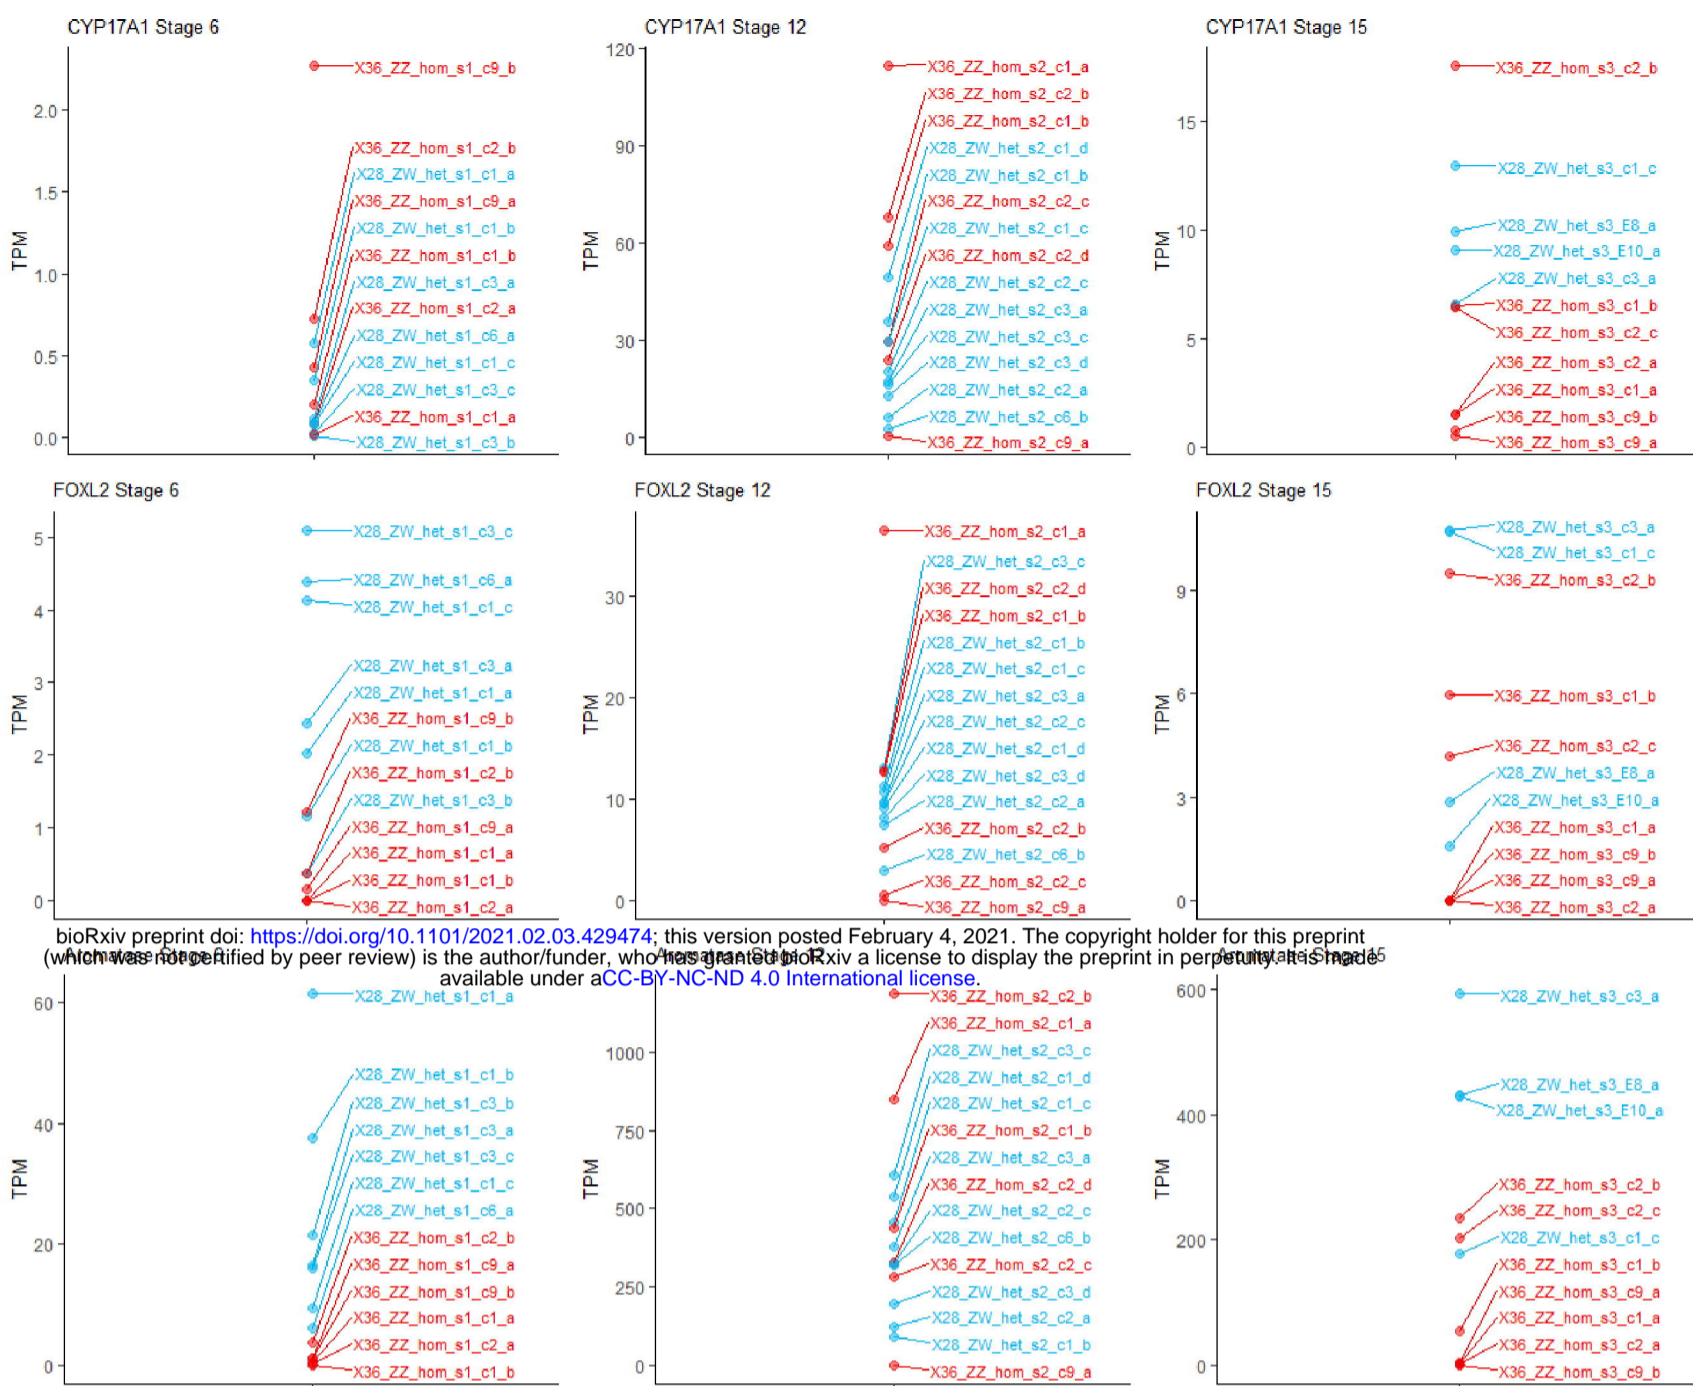**B****Male Gene Panel**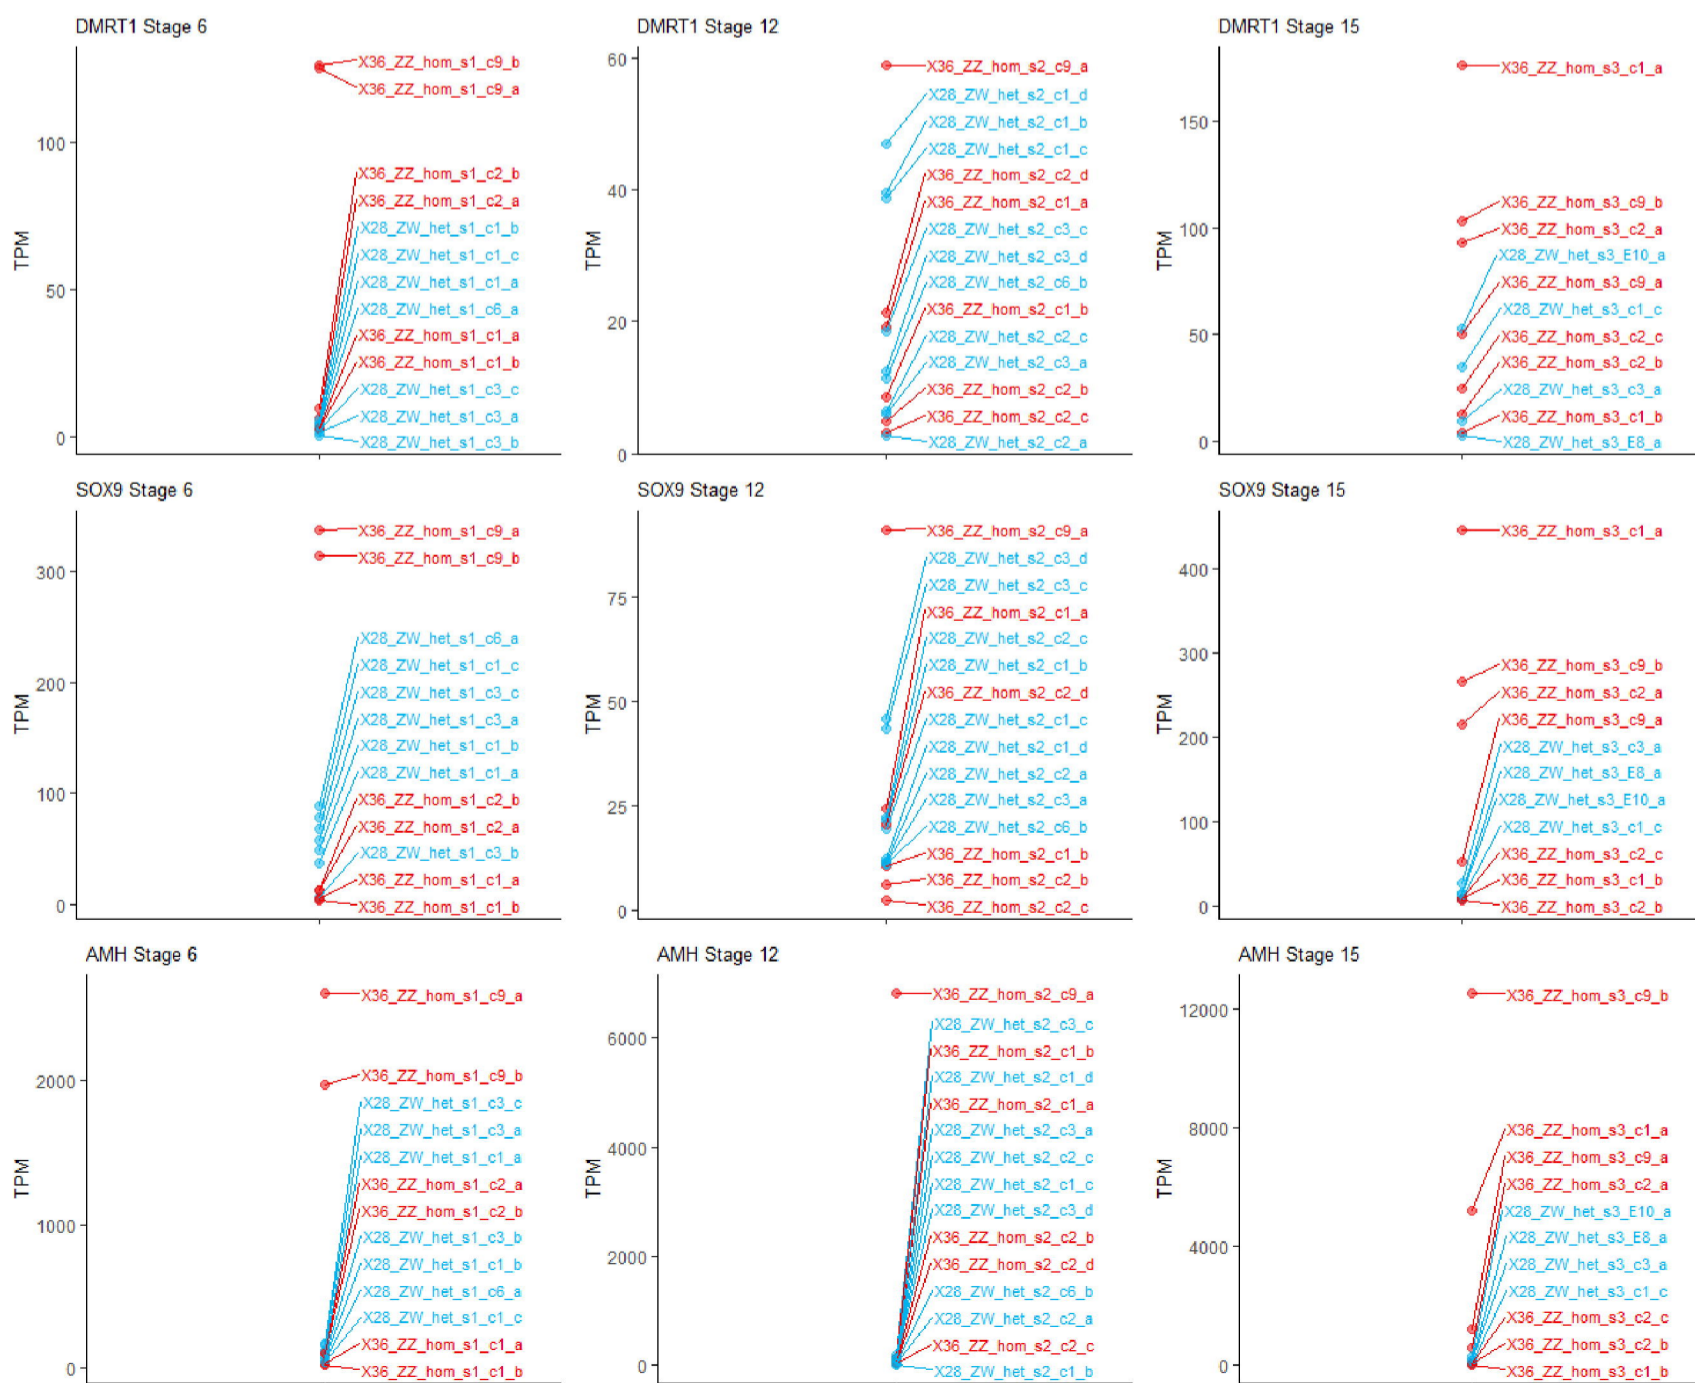

**A**

All Samples

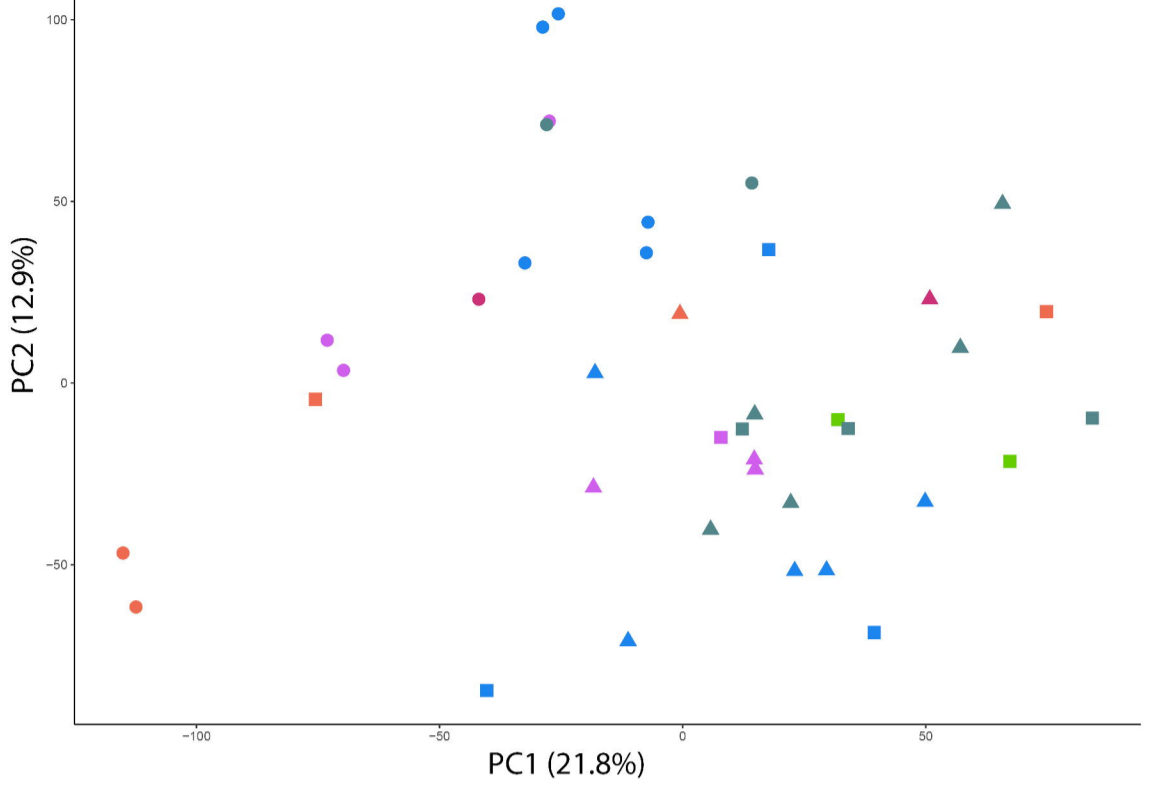**B**

Clutch 9 Removed

bioRxiv preprint doi: <https://doi.org/10.1101/2021.02.03.429474>; this version posted February 4, 2021. The copyright holder for this preprint (which was not certified by peer review) is the author/funder, who has granted bioRxiv a license to display the preprint in perpetuity. It is made available under aCC-BY-NC-ND 4.0 International license.

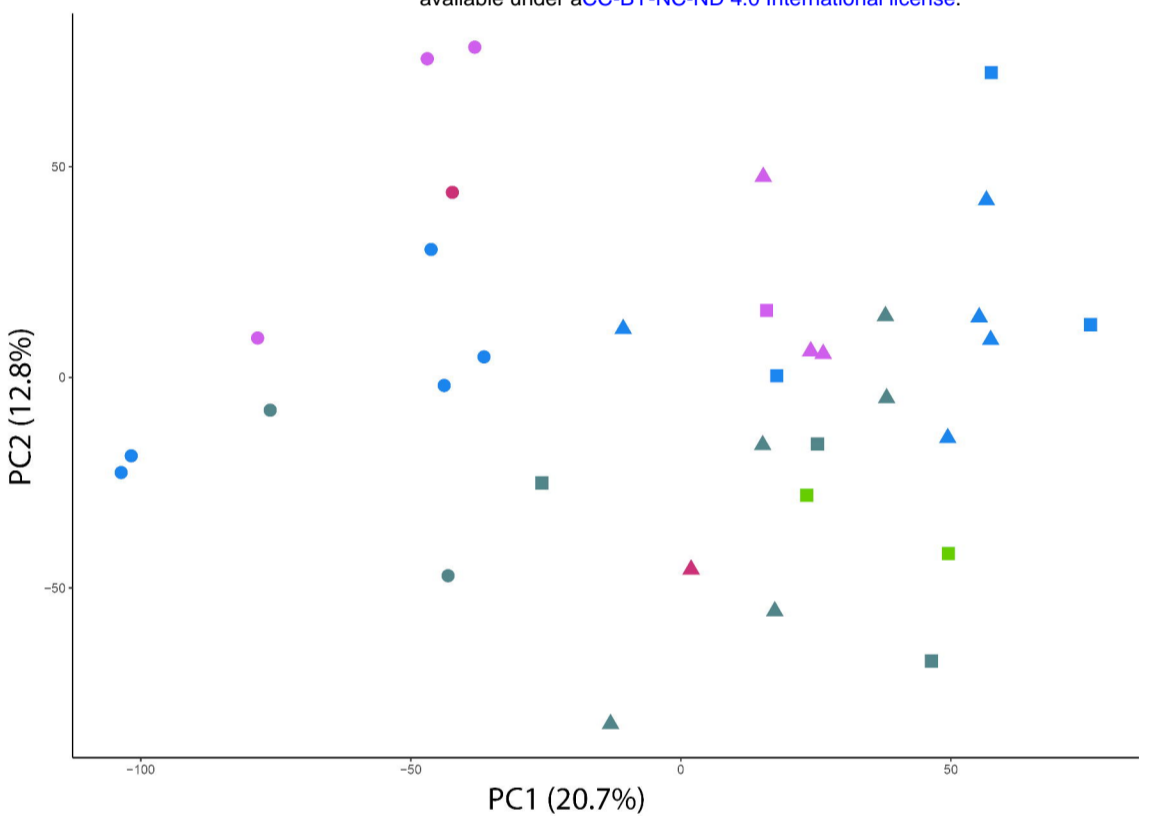**C**

Non-Sex Reversed Removed

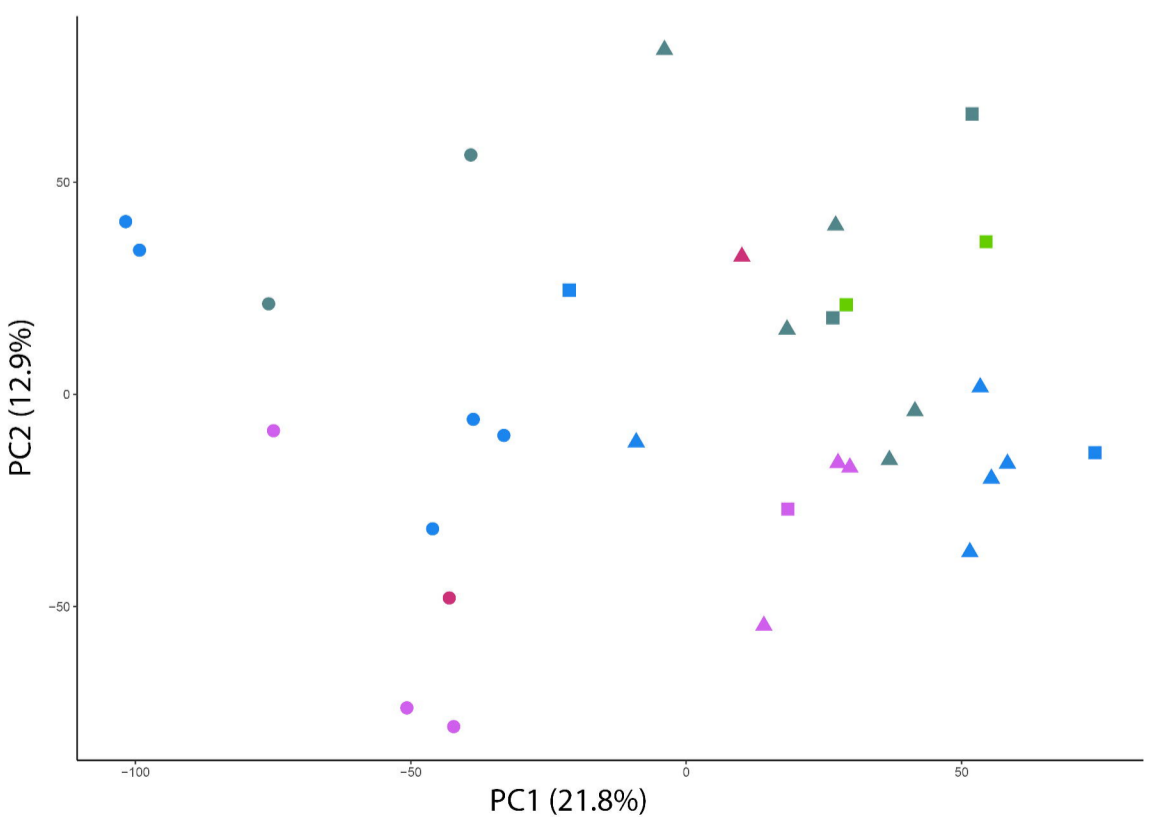

Legend

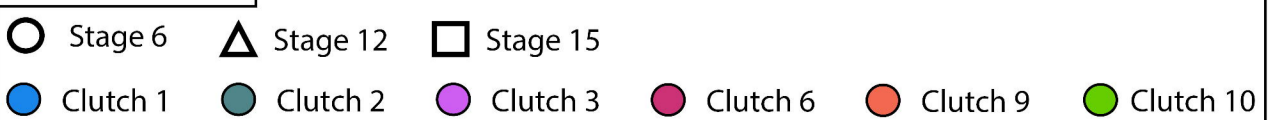

Source: https://biorxiv.org/content/10.1101/2021.02.03.429474v1.full.pdf
