# Supplementary material for: Two transcriptionally distinct pathways drive female development in a reptile with both genetic and temperature dependent sex determination
Source: bioRxiv preprint, doi:10.1101/2021.02.03.429474, version 1 (2021-02-03)
Supplement: supplementary file S5 [file 429474_file17.xlsx]

## Sheet: ZWC1
Gene_ID	Gene_Name
gene1_PDSS2	decaprenyl diphosphate synthase subunit 2
gene100_NOX3	NADPH oxidase 3
gene10002_EBPL	emopamil binding protein like
gene10019_CYFIP1	cytoplasmic FMR1 interacting protein 1
gene1002_PRICKLE4	prickle planar cell polarity protein 4
gene10023_SLC9A7	solute carrier family 9 member A7
gene10029_GTPBP6	GTP binding protein 6 (putative)
gene10041_CDHR1	cadherin related family member 1
gene10046_SLC18A3	solute carrier family 18 member A3
gene10047_CHAT	choline O-acetyltransferase
gene10060_EPAS1	endothelial PAS domain protein 1
gene10074_LOC110080759	solute carrier family 22 member 7-like
gene10077_LOC110080760	cullin-9-like
gene10079_PTK7	protein tyrosine kinase 7 (inactive)
gene10080_LOC110080764	heme-binding protein 1-like
gene10088_LOC110080728	transmembrane protein 121-like
gene10114_MUC19	mucin 19
gene10118_ABCD2	ATP binding cassette subfamily D member 2
gene10121_LOC110080797	maltase-glucoamylase
gene10122_CPNE8	copine 8
gene10130_CERK	ceramide kinase
gene10136_LACC1	laccase domain containing 1
gene10137_TSC22D1	TSC22 domain family member 1
gene10144_SLC25A30	solute carrier family 25 member 30
gene10149_SPON2	spondin 2
gene10160_FMNL2	formin like 2
gene10166_KCNJ3	potassium voltage-gated channel subfamily J member 3
gene1017_LOC110079691	chitotriosidase-1-like
gene10170_BMP6	bone morphogenetic protein 6
gene10208_GABBR2	gamma-aminobutyric acid type B receptor subunit 2
gene10211_GALNT12	polypeptide N-acetylgalactosaminyltransferase 12
gene10227_RASSF10	Ras association domain family member 10
gene10233_OVCH2	ovochymase 2
gene10234_LOC110080930	NADH-cytochrome b5 reductase 2
gene10238_SYT9	synaptotagmin 9
gene10266_LOC110081042	girdin-like
gene10267_RPS6KA4	ribosomal protein S6 kinase A4
gene10278_EML3	echinoderm microtubule associated protein like 3
gene10279_B3GAT3	beta-1
gene10292_BSCL2	BSCL2
gene10294_LRRN4CL	LRRN4 C-terminal like
gene10301_CFAP126	cilia and flagella associated protein 126
gene10317_ADAMTS4	ADAM metallopeptidase with thrombospondin type 1 motif 4
gene10323_PACS1	phosphofurin acidic cluster sorting protein 1
gene10326_FCER1G	Fc fragment of IgE receptor Ig
gene1033_PIK3C2B	phosphatidylinositol-4-phosphate 3-kinase catalytic subunit type 2 beta
gene10335_RUSC1	RUN and SH3 domain containing 1
gene10341_FAM189B	family with sequence similarity 189 member B
gene10347_THBS3	thrombospondin 3
gene10349_TRIM46	tripartite motif containing 46
gene10353_EFNA1	ephrin A1
gene10354_EFNA3	ephrin A3
gene10355_EFNA4	ephrin A4
gene10356_LOC110081026	anther-specific proline-rich protein APG-like
gene10357_ADAM15	ADAM metallopeptidase domain 15
gene10359_DCST2	DC-STAMP domain containing 2
gene10367_KCNN3	potassium calcium-activated channel subfamily N member 3
gene10369_CHRNB2	cholinergic receptor nicotinic beta 2 subunit
gene10371_TDRD10	tudor domain containing 10
gene10372_SHE	Src homology 2 domain containing E
gene10373_IL6R	interleukin 6 receptor
gene10383_BMP7	bone morphogenetic protein 7
gene1039_NFASC	neurofascin
gene10390_CTCFL	CCCTC-binding factor like
gene10393_PCK1	phosphoenolpyruvate carboxykinase 1
gene10403_BNC2	basonuclin 2
gene10406_SYK	spleen associated tyrosine kinase
gene10407_AUH	AU RNA binding methylglutaconyl-CoA hydratase
gene10420_LOC110081122	lysozyme C
gene10435_LOC110081203	adiponectin receptor protein 1-like
gene10439_LOC110081189	caM kinase-like vesicle-associated protein
gene10441_LOC110081153	transforming protein RhoA-like
gene10444_CDK16	cyclin dependent kinase 16
gene10489_PORCN	porcupine homolog (Drosophila)
gene10490_LOC110081144	organic solute transporter subunit alpha-like
gene10494_PRAF2	PRA1 domain family member 2
gene10495_CCDC120	coiled-coil domain containing 120
gene10509_CAMK1D	calcium/calmodulin dependent protein kinase ID
gene10534_TMEM243	transmembrane protein 243
gene10536_CSMD1	CUB and Sushi multiple domains 1
gene10560_FA2H	fatty acid 2-hydroxylase
gene10562_RFWD3	ring finger and WD repeat domain 3
gene10563_GLG1	golgi glycoprotein 1
gene10564_PDPR	pyruvate dehydrogenase phosphatase regulatory subunit
gene10566_LOC110081278	fibulin-7-like
gene10567_CEBPA	CCAAT/enhancer binding protein alpha
gene10578_GPI	glucose-6-phosphate isomerase
gene10582_KIFC3	kinesin family member C3
gene10584_LOC110081259	uncharacterized LOC110081259
gene10599_CALB2	calbindin 2
gene106_CNKSR3	CNKSR family member 3
gene10600_HYDIN	HYDIN
gene10602_MTSS1L	MTSS1L
gene10612_FHOD1	formin homology 2 domain containing 1
gene10613_LOC110081292	corticosteroid 11-beta-dehydrogenase isozyme 2-like
gene10616_LOC110081322	SNF-related serine/threonine-protein kinase-like
gene10621_CUNH14orf132	chromosome unknown C14orf132 homolog
gene10622_BDKRB2	bradykinin receptor B2
gene10645_CD79B	CD79b molecule
gene10655_FAM171A2	family with sequence similarity 171 member A2
gene10663_C1QL1	complement C1q like 1
gene10671_CHCHD6	coiled-coil-helix-coiled-coil-helix domain containing 6
gene10679_GATA2	GATA binding protein 2
gene10684_LOC110081409	histone H2A type 2-B-like
gene10685_HMCES	5-hydroxymethylcytosine (hmC) binding
gene10687_COL7A1	collagen type VII alpha 1 chain
gene10690_CELSR3	cadherin EGF LAG seven-pass G-type receptor 3
gene10694_NTRK1	neurotrophic receptor tyrosine kinase 1
gene10713_PEA15	phosphoprotein enriched in astrocytes 15
gene10715_LOC110081459	sodium/potassium-transporting ATPase subunit alpha-2
gene10717_IGSF8	immunoglobulin superfamily member 8
gene1072_CUNH11orf96	chromosome unknown C11orf96 homolog
gene10733_SV2A	synaptic vesicle glycoprotein 2A
gene1074_LOC110082450	probable inactive 1-aminocyclopropane-1-carboxylate synthase-like protein 2
gene10750_RPRD2	regulation of nuclear pre-mRNA domain containing 2
gene10752_ECM1	extracellular matrix protein 1
gene10754_LOC110081541	ADAMTS-like protein 4
gene10757_LOC110081511	unconventional myosin-Ie-like
gene10759_LOC110081514	uncharacterized LOC110081514
gene1076_ALX4	ALX homeobox 4
gene10767_SEMA6C	semaphorin 6C
gene1077_CD82	CD82 molecule
gene10772_BNIPL	BCL2 interacting protein like
gene10773_PRUNE1	prune exopolyphosphatase 1
gene10782_CTSS	cathepsin S
gene10796_CGN	cingulin
gene10800_CELF3	CUGBP Elav-like family member 3
gene10804_TDRKH	tudor and KH domain containing
gene10807_RORC	RAR related orphan receptor C
gene1081_TP53I11	tumor protein p53 inducible protein 11
gene10811_S100A10	S100 calcium binding protein A10
gene10824_PLA2R1	phospholipase A2 receptor 1
gene10826_CD302	CD302 molecule
gene10842_VOPP1	vesicular
gene10848_FAM83D	family with sequence similarity 83 member D
gene10850_PPP1R16B	protein phosphatase 1 regulatory subunit 16B
gene10853_ARHGAP40	Rho GTPase activating protein 40
gene10870_FBLN2	fibulin 2
gene10884_DDR2	discoidin domain receptor tyrosine kinase 2
gene10887_OLFML2B	olfactomedin like 2B
gene1089_MAPK8IP1	mitogen-activated protein kinase 8 interacting protein 1
gene10890_LOC110081633	regulator of G-protein signaling 5-like
gene10929_JARID2	jumonji and AT-rich interaction domain containing 2
gene1093_PHF21A	PHD finger protein 21A
gene10933_GMPR	guanosine monophosphate reductase
gene10938_LOC110081713	cytochrome P450 1A1-like
gene1094_CREB3L1	cAMP responsive element binding protein 3 like 1
gene1095_DGKZ	diacylglycerol kinase zeta
gene10951_LOC110081722	glutamate receptor ionotropic
gene10953_LOC110081716	glutamate receptor ionotropic
gene10960_CRB3	crumbs 3
gene10961_LOC110081743	calcium-binding mitochondrial carrier protein SCaMC-3
gene10962_KHSRP	KH-type splicing regulatory protein
gene10989_LOC110081765	nuclear factor interleukin-3-regulated protein-like
gene10990_MAST1	microtubule associated serine/threonine kinase 1
gene11006_THOC6	THO complex 6
gene11008_LOC110081778	zymogen granule membrane protein 16-like
gene11020_ASPHD1	aspartate beta-hydroxylase domain containing 1
gene11023_KCTD13	potassium channel tetramerization domain containing 13
gene11031_MVP	major vault protein
gene11033_FAM57B	family with sequence similarity 57 member B
gene11042_CORO1A	coronin 1A
gene1107_CUNH11orf49	chromosome unknown C11orf49 homolog
gene11070_IZUMO2	IZUMO family member 2
gene11072_LOC110081888	myosin-10-like
gene11078_SULT2B1	sulfotransferase family 2B member 1
gene11084_RASIP1	Ras interacting protein 1
gene11093_FAM83E	family with sequence similarity 83 member E
gene11106_GRIN2D	glutamate ionotropic receptor NMDA type subunit 2D
gene11121_BARD1	BRCA1 associated RING domain 1
gene11128_KCNMB2	potassium calcium-activated channel subfamily M regulatory beta subunit 2
gene11149_SLC7A4	solute carrier family 7 member 4
gene11151_P2RX6	purinergic receptor P2X 6
gene11153_AIFM3	apoptosis inducing factor
gene11156_LOC110082000	uncharacterized LOC110082000
gene11167_MLEC	malectin
gene11169_ACADS	acyl-CoA dehydrogenase
gene1117_SLC39A13	solute carrier family 39 member 13
gene11170_SPPL3	signal peptide peptidase like 3
gene11174_RNF185	ring finger protein 185
gene11185_ANHX	anomalous homeobox
gene11187_SLC5A1	solute carrier family 5 member 1
gene11194_ADORA2A	adenosine A2a receptor
gene11195_UPB1	beta-ureidopropionase 1
gene11198_LRRC75B	leucine rich repeat containing 75B
gene11208_LOC110081974	glutathione S-transferase theta-1-like
gene11211_DDX51	DEAD-box helicase 51
gene11229_ARAP3	ArfGAP with RhoGAP domain
gene11233_PCDH1	protocadherin 1
gene11235_PCDH12	protocadherin 12
gene11238_NUDT19	nudix hydrolase 19
gene11245_ZNF507	zinc finger protein 507
gene1125_FAM180B	family with sequence similarity 180 member B
gene11250_FKBP10	FK506 binding protein 10
gene11251_CUNH17orf53	chromosome unknown C17orf53 homolog
gene1126_C1QTNF4	C1q and TNF related 4
gene11267_LOC110082037	transcription factor CP2-like protein 1
gene11272_PPP1R1B	protein phosphatase 1 regulatory inhibitor subunit 1B
gene11273_STARD3	StAR related lipid transfer domain containing 3
gene11277_PGAP3	post-GPI attachment to proteins 3
gene11278_ERBB2	erb-b2 receptor tyrosine kinase 2
gene11280_GRB7	growth factor receptor bound protein 7
gene11282_IKZF3	IKAROS family zinc finger 3
gene11285_LRRC3C	leucine rich repeat containing 3C
gene11286_ORMDL3	ORMDL sphingolipid biosynthesis regulator 3
gene11290_PSD2	pleckstrin and Sec7 domain containing 2
gene11291_NRG2	neuregulin 2
gene11296_HBEGF	heparin binding EGF like growth factor
gene11297_SLC4A9	solute carrier family 4 member 9
gene11312_LOC110082127	protocadherin-10-like
gene11313_LOC110082095	protocadherin alpha-5-like
gene11321_LOC110082080	protocadherin beta-16-like
gene11322_LOC110082079	protocadherin beta-16-like
gene11323_LOC110082081	protocadherin beta-16-like
gene11326_LOC110082117	protocadherin gamma-A6-like
gene11334_LOC110082109	protocadherin gamma-A6-like
gene11340_ADAMTS20	ADAM metallopeptidase with thrombospondin type 1 motif 20
gene11364_TRIM71	tripartite motif containing 71
gene11372_SNRK	SNF related kinase
gene11380_LOC110082225	uncharacterized LOC110082225
gene114_VIP	vasoactive intestinal peptide
gene11400_KDELR2	KDEL endoplasmic reticulum protein retention receptor 2
gene11410_LOC110082215	putative short-chain dehydrogenase/reductase family 42E member 2
gene11411_LOC110082216	putative short-chain dehydrogenase/reductase family 42E member 2
gene11416_ANKS4B	ankyrin repeat and sterile alpha motif domain containing 4B
gene11417_ZP2	zona pellucida glycoprotein 2
gene11419_TMEM159	transmembrane protein 159
gene11432_LOC110082183	acyl-coenzyme A synthetase ACSM3
gene11437_PODN	podocan
gene11442_LRP8	LDL receptor related protein 8
gene11444_DMRTB1	DMRT like family B with proline rich C-terminal 1
gene11445_GLIS1	GLIS family zinc finger 1
gene1145_TMEM229B	transmembrane protein 229B
gene1146_RAD51B	RAD51 paralog B
gene11462_LOC110082262	transmembrane protein 205-like
gene11463_TTC4	tetratricopeptide repeat domain 4
gene1147_KLF6	Kruppel like factor 6
gene11470_DHCR24	24-dehydrocholesterol reductase
gene11475_PTPRU	protein tyrosine phosphatase
gene11483_LOC110082286	connective tissue growth factor-like
gene11488_BCL6B	B-cell CLL/lymphoma 6B
gene11489_LOC110082374	monocarboxylate transporter 13-like
gene1149_FZD8	frizzled class receptor 8
gene11491_LOC110082304	monocarboxylate transporter 13-like
gene11492_ACAP1	ArfGAP with coiled-coil
gene115_MYCT1	MYC target 1
gene11506_DLG4	discs large MAGUK scaffold protein 4
gene11510_TNK1	tyrosine kinase non receptor 1
gene11511_PLSCR3	phospholipid scramblase 3
gene11513_LOC110082343	uncharacterized LOC110082343
gene11514_NLGN2	neuroligin 2
gene11516_FGF11	fibroblast growth factor 11
gene11534_LOC110082359	phosphatidylinositol 4
gene11538_LOC110082320	chloride channel protein ClC-Kb-like
gene11549_LOC110082322	probable cation-transporting ATPase 13A3
gene11552_NYAP1	neuronal tyrosine phosphorylated phosphoinositide-3-kinase adaptor 1
gene11553_AGFG2	ArfGAP with FG repeats 2
gene11563_LRCH4	leucine rich repeats and calponin homology domain containing 4
gene11569_CHRNE	cholinergic receptor nicotinic epsilon subunit
gene11572_PLD2	phospholipase D2
gene11578_LOC110082391	serine protease 55-like
gene11582_PELP1	proline
gene11594_ARHGEF3	Rho guanine nucleotide exchange factor 3
gene11596_HESX1	HESX homeobox 1
gene11607_DNASE1L3	deoxyribonuclease 1 like 3
gene11616_ERRFI1	ERBB receptor feedback inhibitor 1
gene11622_LOC110082468	coiled-coil domain-containing protein 50-like
gene11624_PER3	period circadian clock 3
gene11631_LOC110082447	taste receptor type 1 member 1-like
gene11639_ACOT7	acyl-CoA thioesterase 7
gene1164_ZEB1	zinc finger E-box binding homeobox 1
gene11643_RNF207	ring finger protein 207
gene11649_IRX6	iroquois homeobox 6
gene11667_IL22RA1	interleukin 22 receptor subunit alpha 1
gene11668_MYOM3	myomesin 3
gene11682_LOC110082523	elongation factor 1-alpha
gene11692_GJB5	gap junction protein beta 5
gene11694_GJA4	gap junction protein alpha 4
gene117_ESR1	estrogen receptor 1
gene11704_LOC110082607	protein PRRC2A-like
gene11716_LOC110082570	NAC-alpha domain-containing protein 1-like
gene11720_LOC110082610	cyclin-dependent kinase 5 activator 1-like
gene11722_SCAP	SREBF chaperone
gene11724_CSPG5	chondroitin sulfate proteoglycan 5
gene11725_SMARCC1	SWI/SNF related
gene11726_LOC110082563	KAT8 regulatory NSL complex subunit 1-like
gene11727_DHX30	DExH-box helicase 30
gene11730_LOC110082549	uncharacterized LOC110082549
gene11757_NOS3	nitric oxide synthase 3
gene1177_ARMC4	armadillo repeat containing 4
gene11772_SMARCD3	SWI/SNF related
gene11775_LOC110082620	plexin-A4
gene11781_SLC35B4	solute carrier family 35 member B4
gene11791_CCDC68	coiled-coil domain containing 68
gene11795_PTGER1	prostaglandin E receptor 1
gene11796_LOC110082643	transitional endoplasmic reticulum ATPase-like
gene11800_ADGRE5	adhesion G protein-coupled receptor E5
gene11802_ADGRL1	adhesion G protein-coupled receptor L1
gene11804_ASF1B	anti-silencing function 1B histone chaperone
gene11808_PRR36	proline rich 36
gene11813_TGFBR3L	transforming growth factor beta receptor 3 like
gene11814_EVI5L	ecotropic viral integration site 5 like
gene11817_MAN2B1	mannosidase alpha class 2B member 1
gene11818_TRMT1	tRNA methyltransferase 1
gene11853_LOC110082704	uncharacterized LOC110082704
gene11854_DENND2A	DENN domain containing 2A
gene1186_ABI1	abl interactor 1
gene11860_KIAA1324L	KIAA1324 like
gene11861_GRM3	glutamate metabotropic receptor 3
gene11871_CAMKMT	calmodulin-lysine N-methyltransferase
gene11881_FAM167B	family with sequence similarity 167 member B
gene11903_TMEM54	transmembrane protein 54
gene11924_GRIK3	glutamate ionotropic receptor kainate type subunit 3
gene11943_RHBDL2	rhomboid like 2
gene11948_LOC110082839	C-C motif chemokine 19-like
gene11949_LOC110082834	uncharacterized LOC110082834
gene11951_DNAJB5	DnaJ heat shock protein family (Hsp40) member B5
gene11954_FANCG	Fanconi anemia complementation group G
gene11959_UNC13B	unc-13 homolog B
gene11960_LOC110082805	phospholipid-transporting ATPase ID-like
gene11961_RUSC2	RUN and SH3 domain containing 2
gene11962_TESK1	testis-specific kinase 1
gene11967_LRPAP1	LDL receptor related protein associated protein 1
gene11969_FAM221B	family with sequence similarity 221 member B
gene1197_ARHGAP21	Rho GTPase activating protein 21
gene11970_TAF1C	TATA-box binding protein associated factor
gene11972_SPAG8	sperm associated antigen 8
gene1198_KIAA1217	KIAA1217 ortholog
gene11986_ESR2	estrogen receptor 2
gene12000_LOC110082869	DNA polymerase epsilon catalytic subunit A-like
gene12004_INPP5J	inositol polyphosphate-5-phosphatase J
gene12008_MORC2	MORC family CW-type zinc finger 2
gene12016_SLC35E4	solute carrier family 35 member E4
gene12025_LOC110082902	coiled-coil domain-containing protein 157-like
gene12036_LOC110082897	uncharacterized LOC110082897
gene12050_LOC110082916	cytochrome P450 2H2-like
gene12057_LRSAM1	leucine rich repeat and sterile alpha motif containing 1
gene12064_NSMF	NMDA receptor synaptonuclear signaling and neuronal migration factor
gene12066_ENTPD8	ectonucleoside triphosphate diphosphohydrolase 8
gene12067_LOC110082943	discoidin domain-containing receptor 2-like
gene12094_SLC2A8	solute carrier family 2 member 8
gene12102_CNTRL	centriolin
gene12106_CD99L2	CD99 molecule like 2
gene12108_MTM1	myotubularin 1
gene12112_LOC110082987	heat shock transcription factor
gene12117_FMR1	fragile X mental retardation 1
gene12119_KCNJ8	potassium voltage-gated channel subfamily J member 8
gene12121_GYS2	glycogen synthase 2
gene12124_CASC1	cancer susceptibility 1
gene12126_KRAS	KRAS proto-oncogene
gene12132_LOC110083017	kalirin
gene12139_ADCY5	adenylate cyclase 5
gene12141_PDIA5	protein disulfide isomerase family A member 5
gene12160_GGT7	gamma-glutamyltransferase 7
gene12167_UPP2	uridine phosphorylase 2
gene12168_ACVR1	activin A receptor type 1
gene12171_CYTIP	cytohesin 1 interacting protein
gene12174_GPD2	glycerol-3-phosphate dehydrogenase 2
gene1218_FAM149A	family with sequence similarity 149 member A
gene12185_FAM89A	family with sequence similarity 89 member A
gene12188_TRIM67	tripartite motif containing 67
gene1219_TLR3	toll like receptor 3
gene12196_FAM120B	family with sequence similarity 120B
gene1220_SORBS2	sorbin and SH3 domain containing 2
gene12201_THBS2	thrombospondin 2
gene12203_LOC110083063	sulfotransferase 6B1-like
gene12219_TASP1	taspase 1
gene12220_LOC110083103	cadherin-10-like
gene12223_ACTA2	actin
gene12224_STAMBPL1	STAM binding protein like 1
gene1223_CUNH4orf47	chromosome unknown C4orf47 homolog
gene12232_LOC110083117	gastric triacylglycerol lipase-like
gene12233_RNLS	renalase
gene12234_PTEN	phosphatase and tensin homolog
gene12236_PAPSS2	3'-phosphoadenosine 5'-phosphosulfate synthase 2
gene12238_LOC110083124	multiple inositol polyphosphate phosphatase 1-like
gene12240_A1CF	APOBEC1 complementation factor
gene12260_CD164	CD164 molecule
gene12270_SLC22A16	solute carrier family 22 member 16
gene12282_LOC110083158	neuronal acetylcholine receptor subunit alpha-7-like
gene1229_CFAP97	cilia and flagella associated protein 97
gene12295_PDE3B	phosphodiesterase 3B
gene12296_LOC110083178	vitamin D 25-hydroxylase
gene12298_INSC	inscuteable homolog (Drosophila)
gene12309_LOC110083208	protein NipSnap homolog 3B-like
gene1231_HELT	helt bHLH transcription factor
gene12312_SLC44A1	solute carrier family 44 member 1
gene1232_ACSL1	acyl-CoA synthetase long-chain family member 1
gene12338_RCAN2	regulator of calcineurin 2
gene12339_LOC110083224	24-hydroxycholesterol 7-alpha-hydroxylase
gene12372_CLYBL	citrate lyase beta like
gene12378_LOC110083262	maestro heat-like repeat-containing protein family member 6
gene12381_ELN	elastin
gene12382_MKS1	Meckel syndrome
gene12385_CUNH2orf72	chromosome unknown C2orf72 homolog
gene12394_PITPNM3	PITPNM family member 3
gene124_PLEKHG1	pleckstrin homology and RhoGEF domain containing G1
gene1240_STOX2	storkhead box 2
gene12401_SMTNL2	smoothelin like 2
gene12413_CLIP2	CAP-Gly domain containing linker protein 2
gene1243_LOC110083972	NACHT domain- and WD repeat-containing protein 1-like
gene12436_FAM175A	family with sequence similarity 175 member A
gene12447_TMEM150C	transmembrane protein 150C
gene12454_LOC110083353	rRNA-processing protein EBP2-like
gene12456_LOC110083335	plectin-like
gene12459_LOC110083355	glyoxal reductase-like
gene12476_CNDP2	carnosine dipeptidase 2
gene12498_SGSM1	small G protein signaling modulator 1
gene12502_CRYBB2	crystallin beta B2
gene12503_GRK3	G protein-coupled receptor kinase 3
gene12504_MYO18B	myosin XVIIIB
gene12505_SEZ6L	seizure related 6 homolog like
gene12511_TPST2	tyrosylprotein sulfotransferase 2
gene12518_TTC28	tetratricopeptide repeat domain 28
gene12520_LOC110083426	solute carrier family 2
gene12523_ZNRF3	zinc and ring finger 3
gene12529_FAM222A	family with sequence similarity 222 member A
gene12537_UNG	uracil DNA glycosylase
gene12540_SVOP	SV2 related protein
gene12541_DAO	D-amino acid oxidase
gene12543_CORO1C	coronin 1C
gene12545_TMEM119	transmembrane protein 119
gene12548_FICD	FIC domain containing
gene12549_CMKLR1	chemerin chemokine-like receptor 1
gene12551_RPH3A	rabphilin 3A
gene12556_CDH13	cadherin 13
gene12561_WFDC1	WAP four-disulfide core domain 1
gene12566_KLHL36	kelch like family member 36
gene12568_CRISPLD2	cysteine rich secretory protein LCCL domain containing 2
gene12570_ZDHHC7	zinc finger DHHC-type containing 7
gene12583_CPE	carboxypeptidase E
gene12586_TMEM192	transmembrane protein 192
gene1259_SPATA4	spermatogenesis associated 4
gene126_PPP1R14C	protein phosphatase 1 regulatory inhibitor subunit 14C
gene12600_BRMS1L	breast cancer metastasis-suppressor 1 like
gene12604_NFKBIA	NFKB inhibitor alpha
gene12606_LOC110083527	serine/threonine-protein kinase ATR-like
gene12612_CHST2	carbohydrate sulfotransferase 2
gene12613_SLC9A9	solute carrier family 9 member A9
gene12626_LOC110083557	gap junction beta-6 protein-like
gene12635_SKA3	spindle and kinetochore associated complex subunit 3
gene12651_LOC110083574	60 kDa lysophospholipase-like
gene12654_TMEM179	transmembrane protein 179
gene12660_SYTL4	synaptotagmin like 4
gene12681_PLN	phospholamban
gene12686_GOPC	golgi associated PDZ and coiled-coil motif containing
gene12700_FBLN5	fibulin 5
gene12709_GOLGA5	golgin A5
gene12716_UNC79	unc-79 homolog (C. elegans)
gene12725_PHYHIPL	phytanoyl-CoA 2-hydroxylase interacting protein like
gene12727_BICC1	BicC family RNA binding protein 1
gene12736_RET	ret proto-oncogene
gene12742_LOC110083676	pulmonary surfactant-associated protein D-like
gene12753_DYDC1	DPY30 domain containing 1
gene12765_GREB1	growth regulation by estrogen in breast cancer 1
gene12768_PQLC3	PQ loop repeat containing 3
gene12774_GBX2	gastrulation brain homeobox 2
gene12776_IQCA1	IQ motif containing with AAA domain 1
gene12814_LOC110083752	neurexin-2
gene12815_LOC110083753	neurexin-2-like
gene12816_RASGRP2	RAS guanyl releasing protein 2
gene12817_PYGM	glycogen phosphorylase
gene12818_SF1	splicing factor 1
gene12819_MAP4K2	mitogen-activated protein kinase kinase kinase kinase 2
gene12820_ARHGEF2	Rho/Rac guanine nucleotide exchange factor 2
gene12825_GLMP	glycosylated lysosomal membrane protein
gene12829_LOC110083743	V-set and immunoglobulin domain-containing protein 8-like
gene12830_CFAP45	cilia and flagella associated protein 45
gene12831_TAGLN2	transgelin 2
gene12838_GPR135	G protein-coupled receptor 135
gene12849_KTN1	kinectin 1
gene12854_LOC110083790	transmembrane protein 254-like
gene12856_PLAC9	placenta specific 9
gene12870_PPARG	peroxisome proliferator activated receptor gamma
gene12872_TIMP4	TIMP metallopeptidase inhibitor 4
gene12879_NAA25	N(alpha)-acetyltransferase 25
gene1288_CACNA1D	calcium voltage-gated channel subunit alpha1 D
gene12882_LOC110083883	disintegrin and metalloproteinase domain-containing protein 21-like
gene12885_ACAD10	acyl-CoA dehydrogenase family member 10
gene12894_HVCN1	hydrogen voltage gated channel 1
gene1290_IL17RB	interleukin 17 receptor B
gene12917_LOC110083830	calcium release-activated calcium channel protein 1
gene12938_PITPNM2	phosphatidylinositol transfer protein membrane associated 2
gene12947_TMED2	transmembrane p24 trafficking protein 2
gene12960_SLC6A6	solute carrier family 6 member 6
gene12971_LOC110083923	latent-transforming growth factor beta-binding protein 1-like
gene1298_LOC110084556	acyl-CoA synthetase short-chain family member 3
gene12992_FEZ2	fasciculation and elongation protein zeta 2
gene12993_CRIM1	cysteine rich transmembrane BMP regulator 1
gene12994_COL3A1	collagen type III alpha 1 chain
gene12995_COL5A2	collagen type V alpha 2 chain
gene12997_WDR75	WD repeat domain 75
gene13002_ORMDL1	ORMDL sphingolipid biosynthesis regulator 1
gene13004_CUNH2orf88	chromosome unknown C2orf88 homolog
gene13007_MFSD6	major facilitator superfamily domain containing 6
gene13015_STAT4	signal transducer and activator of transcription 4
gene13029_USH1C	USH1 protein network component harmonin
gene13031_KCNJ11	potassium voltage-gated channel subfamily J member 11
gene13042_IQCK	IQ motif containing K
gene13051_ITPRIPL2	inositol 1
gene13064_CFAP52	cilia and flagella associated protein 52
gene13070_LOC110084020	Golgi apparatus membrane protein TVP23 homolog B-like
gene13072_PMP22	peripheral myelin protein 22
gene13078_LOC110084054	uncharacterized LOC110084054
gene13089_TCTN3	tectonic family member 3
gene13106_AASS	aminoadipate-semialdehyde synthase
gene1311_NAV3	neuron navigator 3
gene13110_SLC13A1	solute carrier family 13 member 1
gene13122_CUNH11orf87	chromosome unknown C11orf87 homolog
gene13125_KDELC2	KDEL motif containing 2
gene13128_LOC110084085	protein NPAT
gene13129_ACAT1	acetyl-CoA acetyltransferase 1
gene13132_SLC35F2	solute carrier family 35 member F2
gene13135_ELMOD1	ELMO domain containing 1
gene13145_RASGEF1B	RasGEF domain family member 1B
gene13146_PRKG2	protein kinase
gene13152_LOC110084105	anthrax toxin receptor 2-like
gene13163_PCGF5	polycomb group ring finger 5
gene13170_SLC16A12	solute carrier family 16 member 12
gene13175_LIN28A	lin-28 homolog A
gene13176_CRYBG2	crystallin beta-gamma domain containing 2
gene13178_UBXN11	UBX domain protein 11
gene13180_CEP85	centrosomal protein 85
gene13181_CNKSR1	connector enhancer of kinase suppressor of Ras 1
gene13184_CLIC4	chloride intracellular channel 4
gene13199_EXTL1	exostosin like glycosyltransferase 1
gene13200_SLC30A2	solute carrier family 30 member 2
gene13207_LOC110084179	cryptic protein-like
gene13209_AAED1	AhpC/TSA antioxidant enzyme domain containing 1
gene13212_ZNF367	zinc finger protein 367
gene13214_HSD17B3	hydroxysteroid 17-beta dehydrogenase 3
gene1322_LOC110084783	glioma pathogenesis-related protein 1-like
gene13235_NR1H4	nuclear receptor subfamily 1 group H member 4
gene13255_DCLK3	doublecortin like kinase 3
gene13258_LRRFIP2	LRR binding FLII interacting protein 2
gene13263_ITGA9	integrin subunit alpha 9
gene1327_KCNC2	potassium voltage-gated channel subfamily C member 2
gene13272_MYO1C	myosin IC
gene13282_SERPINF2	serpin family F member 2
gene13283_SERPINF1	serpin family F member 1
gene13290_HIC1	HIC ZBTB transcriptional repressor 1
gene13294_SEBOX	SEBOX homeobox
gene13297_SLC46A1	solute carrier family 46 member 1
gene13298_SLC13A2	solute carrier family 13 member 2
gene13299_FOXN1	forkhead box N1
gene133_GINM1	glycoprotein integral membrane 1
gene13304_LOC110084260	cAMP-dependent protein kinase catalytic subunit PRKX
gene13308_LOC110084293	uncharacterized LOC110084293
gene13322_SEZ6	seizure related 6 homolog
gene13324_MYO18A	myosin XVIIIA
gene13331_ANKRD13B	ankyrin repeat domain 13B
gene13332_CORO6	coronin 6
gene13334_EFCAB5	EF-hand calcium binding domain 5
gene13347_LOC110084322	matrix metalloproteinase-17-like
gene13362_OGDH	oxoglutarate dehydrogenase
gene13363_HSD17B4	hydroxysteroid 17-beta dehydrogenase 4
gene13378_BTBD11	BTB domain containing 11
gene1339_GPBAR1	G protein-coupled bile acid receptor 1
gene13390_LOC110084376	sodium/nucleoside cotransporter 1-like
gene13393_LOC110084389	SH2 domain-containing adapter protein F-like
gene13394_PARP6	poly(ADP-ribose) polymerase family member 6
gene13395_CELF6	CUGBP Elav-like family member 6
gene13402_KIF23	kinesin family member 23
gene13416_LOC110084406	acrosin-like
gene13417_ACR	acrosin
gene13421_LOC110084423	SH3 and multiple ankyrin repeat domains protein 3-like
gene13427_FAM71F2	family with sequence similarity 71 member F2
gene13431_LOC110084419	adenylate kinase 8-like
gene13446_RCCD1	RCC1 domain containing 1
gene13448_MAN2A2	mannosidase alpha class 2A member 2
gene13451_LOC110084442	furin-like
gene13452_AP3B2	adaptor related protein complex 3 beta 2 subunit
gene13453_CPEB1	cytoplasmic polyadenylation element binding protein 1
gene1346_RUFY4	RUN and FYVE domain containing 4
gene13460_CCDC33	coiled-coil domain containing 33
gene1347_TNS1	tensin 1
gene13476_CPLX3	complexin 3
gene13484_DNAH1	dynein axonemal heavy chain 1
gene13494_PARP3	poly(ADP-ribose) polymerase family member 3
gene13495_RRP9	ribosomal RNA processing 9
gene13499_TEX264	testis expressed 264
gene135_ZC3H12D	zinc finger CCCH-type containing 12D
gene1350_IGFBP5	insulin like growth factor binding protein 5
gene13500_LOC110084497	septin-4-like
gene13503_MLXIPL	MLX interacting protein like
gene13504_STX1A	syntaxin 1A
gene13507_BCL7B	BCL tumor suppressor 7B
gene13514_MTMR4	myotubularin related protein 4
gene13515_HSF5	heat shock transcription factor 5
gene13516_RNF43	ring finger protein 43
gene13519_TSPOAP1	TSPO associated protein 1
gene13520_LOC110084515	eosinophil peroxidase-like
gene13522_LOC110084498	myeloperoxidase-like
gene13525_TYW1	tRNA-yW synthesizing protein 1 homolog
gene13536_VKORC1L1	vitamin K epoxide reductase complex subunit 1 like 1
gene1354_MARCH4	membrane associated ring-CH-type finger 4
gene13540_TPST1	tyrosylprotein sulfotransferase 1
gene13543_TMEM132E	transmembrane protein 132E
gene13547_RAD51D	RAD51 paralog D
gene13556_PHF21B	PHD finger protein 21B
gene13569_ARHGEF28	Rho guanine nucleotide exchange factor 28
gene13570_ENC1	ectodermal-neural cortex 1
gene13574_FAM169A	family with sequence similarity 169 member A
gene13577_LOC110084573	3-hydroxy-3-methylglutaryl-coenzyme A reductase-like
gene13587_ARSB	arylsulfatase B
gene13595_PDE8B	phosphodiesterase 8B
gene13617_SCNN1A	sodium channel epithelial 1 alpha subunit
gene13618_VAMP1	vesicle associated membrane protein 1
gene13636_LAG3	lymphocyte activating 3
gene13639_P3H3	prolyl 3-hydroxylase 3
gene13645_ENO2	enolase 2
gene13655_CLSTN3	calsyntenin 3
gene13658_CASR	calcium sensing receptor
gene13675_VWA8	von Willebrand factor A domain containing 8
gene13678_TNFSF11	TNF superfamily member 11
gene13679_LOC110084677	snaclec bitiscetin subunit beta-like
gene13687_ELFN1	extracellular leucine rich repeat and fibronectin type III domain containing 1
gene13693_LOC110084702	integrator complex subunit 1-like
gene13700_GPR146	G protein-coupled receptor 146
gene13724_LOC110084728	synaptonemal complex protein 2-like
gene13727_CDH26	cadherin 26
gene13729_COBLL1	cordon-bleu WH2 repeat protein like 1
gene13731_GRB14	growth factor receptor bound protein 14
gene13759_STAB2	stabilin 2
gene1377_LOC110085420	ras guanine nucleotide exchange factor F-like
gene13770_SLC41A2	solute carrier family 41 member 2
gene13777_IQANK1	IQ motif and ankyrin repeat containing 1
gene13787_PLEC	plectin
gene13789_GRINA	glutamate ionotropic receptor NMDA type subunit associated protein 1
gene13794_SMPD5	sphingomyelin phosphodiesterase 5
gene13797_GPAA1	glycosylphosphatidylinositol anchor attachment 1
gene13799_SHARPIN	SHANK associated RH domain interactor
gene1380_GLI2	GLI family zinc finger 2
gene13802_LOC110084817	uncharacterized LOC110084817
gene13804_HGH1	HGH1 homolog
gene13805_LOC110084835	testis-specific serine/threonine-protein kinase 5-like
gene1381_TFCP2L1	transcription factor CP2 like 1
gene13812_SLC52A2	solute carrier family 52 member 2
gene13818_DGAT1	diacylglycerol O-acyltransferase 1
gene13821_LOC110084845	fucolectin-1-like
gene13824_PPP1R16A	protein phosphatase 1 regulatory subunit 16A
gene13825_LOC110084816	forkhead box protein H1-like
gene13826_GPR20	G protein-coupled receptor 20
gene13827_SLC45A4	solute carrier family 45 member 4
gene1384_LOC110085671	uncharacterized LOC110085671
gene13840_LIMD1	LIM domains containing 1
gene13858_LOC110084879	phospholipid-metabolizing enzyme A-C1-like
gene13861_ACAD11	acyl-CoA dehydrogenase family member 11
gene13870_SLC17A9	solute carrier family 17 member 9
gene1388_SLC15A2	solute carrier family 15 member 2
gene13885_MPP1	membrane palmitoylated protein 1
gene13890_MTCP1	mature T-cell proliferation 1
gene13893_FAAH2	fatty acid amide hydrolase 2
gene13897_NHSL2	NHS like 2
gene13902_ZDHHC9	zinc finger DHHC-type containing 9
gene13904_BCORL1	BCL6 corepressor like 1
gene1391_SEMA5B	semaphorin 5B
gene13914_GLA	galactosidase alpha
gene13916_BTK	Bruton tyrosine kinase
gene13942_LOC110084982	dual specificity protein phosphatase 10-like
gene13945_RTN3	reticulon 3
gene13946_ATL3	atlastin GTPase 3
gene13952_CADM3	cell adhesion molecule 3
gene1396_SPRY4	sprouty RTK signaling antagonist 4
gene13960_RAB26	RAB26
gene13964_LOC110085047	hexosaminidase D-like
gene13968_E4F1	E4F transcription factor 1
gene13969_ZDHHC4	zinc finger DHHC-type containing 4
gene13970_GRID2IP	Grid2 interacting protein
gene13971_SLC5A11	solute carrier family 5 member 11
gene1398_ARHGAP26	Rho GTPase activating protein 26
gene13980_LOC110085023	nascent polypeptide-associated complex subunit alpha
gene13982_PALB2	partner and localizer of BRCA2
gene13991_SCNN1B	sodium channel epithelial 1 beta subunit
gene14009_ZBTB7C	zinc finger and BTB domain containing 7C
gene1401_KCTD16	potassium channel tetramerization domain containing 16
gene14010_CTIF	cap binding complex dependent translation initiation factor
gene14014_DYM	dymeclin
gene14018_LMAN1	lectin
gene14021_GRP	gastrin releasing peptide
gene14028_ALPK2	alpha kinase 2
gene14045_EPB41L4B	erythrocyte membrane protein band 4.1 like 4B
gene1405_SH3RF2	SH3 domain containing ring finger 2
gene14052_SNAP47	synaptosome associated protein 47
gene1407_LARS	leucyl-tRNA synthetase
gene14073_CUNH3orf14	chromosome unknown C3orf14 homolog
gene14077_RHBDD2	rhomboid domain containing 2
gene14078_LOC110085150	mucin-17-like
gene14079_LOC110085143	NADPH--cytochrome P450 reductase
gene14080_TMEM120A	transmembrane protein 120A
gene14097_SH2B2	SH2B adaptor protein 2
gene14104_KLF4	Kruppel like factor 4
gene14123_ITGB4	integrin subunit beta 4
gene14127_MYO15B	myosin XVB
gene1414_STK32A	serine/threonine kinase 32A
gene14142_ATXN7	ataxin 7
gene1416_DPYSL3	dihydropyrimidinase like 3
gene14162_AASDHPPT	aminoadipate-semialdehyde dehydrogenase-phosphopantetheinyl transferase
gene14167_ARHGAP20	Rho GTPase activating protein 20
gene14168_LOC110085224	RING finger protein 17-like
gene1417_JAKMIP2	janus kinase and microtubule interacting protein 2
gene14184_STBD1	starch binding domain 1
gene14188_PPEF2	protein phosphatase with EF-hand domain 2
gene14191_LOC110085235	C-X-C motif chemokine 10-like
gene14192_LOC110085234	C-X-C motif chemokine 11-like
gene14193_LOC110085254	protein FAM47E-like
gene14196_RUFY3	RUN and FYVE domain containing 3
gene14203_KIF21B	kinesin family member 21B
gene14206_LOC110085290	protein FAM107B-like
gene14208_CUNH1orf194	chromosome unknown C1orf194 homolog
gene14209_KIAA1324	KIAA1324 ortholog
gene14211_CELSR2	cadherin EGF LAG seven-pass G-type receptor 2
gene14214_CPNE5	copine 5
gene14218_SYPL2	synaptophysin like 2
gene14221_AMIGO1	adhesion molecule with Ig like domain 1
gene14235_AMD1	adenosylmethionine decarboxylase 1
gene14248_PTPN13	protein tyrosine phosphatase
gene14252_LOC110085325	estradiol 17-beta-dehydrogenase 11-like
gene14259_ESRRG	estrogen related receptor gamma
gene14267_PPP3CA	protein phosphatase 3 catalytic subunit alpha
gene14268_EMCN	endomucin
gene1429_STC2	stanniocalcin 2
gene14291_LRRN3	leucine rich repeat neuronal 3
gene14294_ANXA10	annexin A10
gene14298_PALLD	palladin
gene14299_CBR4	carbonyl reductase 4
gene14300_SH3RF1	SH3 domain containing ring finger 1
gene14302_CLCN3	chloride voltage-gated channel 3
gene14310_SETD9	SET domain containing 9
gene14312_ANKRD55	ankyrin repeat domain 55
gene14314_IL31RA	interleukin 31 receptor A
gene14317_SLC38A9	solute carrier family 38 member 9
gene14318_PLPP1	phospholipid phosphatase 1
gene14325_LOC110085404	granzyme A-like
gene14330_ANO5	anoctamin 5
gene14346_CHST10	carbohydrate sulfotransferase 10
gene14347_NMS	neuromedin S
gene14349_LOC110085445	histone H2A-beta
gene14353_TBC1D8	TBC1 domain family member 8
gene14356_RNF149	ring finger protein 149
gene14357_CREG2	cellular repressor of E1A stimulated genes 2
gene14366_DMRT1	doublesex and mab-3 related transcription factor 1
gene14374_PGM5	phosphoglucomutase 5
gene14378_LOC110085452	uncharacterized LOC110085452
gene14387_DIS3L	DIS3 like exosome 3'-5' exoribonuclease
gene14402_SLC12A4	solute carrier family 12 member 4
gene1441_EFCAB9	EF-hand calcium binding domain 9
gene14413_PLA2G15	phospholipase A2 group XV
gene14423_LOC110085495	cytochrome P450 2J6-like
gene14434_SH3TC1	SH3 domain and tetratricopeptide repeats 1
gene14435_ABLIM2	actin binding LIM protein family member 2
gene14446_MECOM	MDS1 and EVI1 complex locus
gene1446_SH3TC2	SH3 domain and tetratricopeptide repeats 2
gene14466_CUNH9orf3	chromosome unknown C9orf3 homolog
gene1447_LOC110086222	complement factor H-like
gene14471_MED24	mediator complex subunit 24
gene14477_RAPGEFL1	Rap guanine nucleotide exchange factor like 1
gene14479_CDC6	cell division cycle 6
gene14485_IGFBP4	insulin like growth factor binding protein 4
gene1449_TBC1D5	TBC1 domain family member 5
gene14490_CDH5	cadherin 5
gene14500_CUNH4orf48	chromosome unknown C4orf48 homolog
gene14506_EEF2KMT	eukaryotic elongation factor 2 lysine methyltransferase
gene14508_CUNH16orf89	chromosome unknown C16orf89 homolog
gene14516_SSTR5	somatostatin receptor 5
gene1452_SATB1	SATB homeobox 1
gene14543_KDM2A	lysine demethylase 2A
gene14546_ANKRD13D	ankyrin repeat domain 13D
gene14570_RAB15	RAB15
gene14580_SGIP1	SH3 domain GRB2 like endophilin interacting protein 1
gene14585_LEPROT	leptin receptor overlapping transcript
gene14586_DNAJC6	DnaJ heat shock protein family (Hsp40) member C6
gene14591_CACHD1	cache domain containing 1
gene14593_PLLP	plasmolipin
gene14597_CPNE2	copine 2
gene14599_LOC110085698	protein NLRC5-like
gene14601_HERPUD1	homocysteine inducible ER protein with ubiquitin like domain 1
gene14602_SLC12A3	solute carrier family 12 member 3
gene14614_B3GNT9	UDP-GlcNAc:betaGal beta-1
gene14619_DNAAF1	dynein axonemal assembly factor 1
gene14623_NECAB2	N-terminal EF-hand calcium binding protein 2
gene14625_ELOVL4	ELOVL fatty acid elongase 4
gene14634_MEI4	meiotic double-stranded break formation protein 4
gene14642_RASGRP1	RAS guanyl releasing protein 1
gene14644_SPRED1	sprouty related EVH1 domain containing 1
gene14648_DDC	dopa decarboxylase
gene14649_GRB10	growth factor receptor bound protein 10
gene14658_LOC110085769	inversin-like
gene14681_GGA3	golgi associated
gene14686_SLC16A5	solute carrier family 16 member 5
gene14691_LOC110085817	5-hydroxytryptamine receptor 3A-like
gene14697_HID1	HID1 domain containing
gene14699_OTOP2	otopetrin 2
gene14701_FADS6	fatty acid desaturase 6
gene14705_NAT9	N-acetyltransferase 9 (putative)
gene14715_ACAA1	acetyl-CoA acyltransferase 1
gene14717_LOC110085830	cryptochrome DASH-like
gene14740_MORC1	MORC family CW-type zinc finger 1
gene14758_LOC110085892	17-beta-hydroxysteroid dehydrogenase type 6-like
gene14760_APOH	apolipoprotein H
gene14765_AXIN2	axin 2
gene14771_SLC16A6	solute carrier family 16 member 6
gene14776_JMJD6	arginine demethylase and lysine hydroxylase
gene14791_ASIP	agouti signaling protein
gene14800_PIAS2	protein inhibitor of activated STAT 2
gene14802_ST8SIA5	ST8 alpha-N-acetyl-neuraminide alpha-2
gene14817_GMNC	geminin coiled-coil domain containing
gene14818_IL1RAP	interleukin 1 receptor accessory protein
gene14822_LOC110085952	claudin-1-like
gene14824_TP63	tumor protein p63
gene14828_CD38	CD38 molecule
gene14834_PCDH15	protocadherin related 15
gene1484_RBMS3	RNA binding motif single stranded interacting protein 3
gene14841_OMD	osteomodulin
gene14853_MAVS	mitochondrial antiviral signaling protein
gene14861_RSU1	Ras suppressor protein 1
gene14862_CUBN	cubilin
gene14871_LOC110086007	SH2 domain-containing protein 4B-like
gene14886_LOC110086012	uncharacterized LOC110086012
gene14890_DLX2	distal-less homeobox 2
gene14898_FAM110A	family with sequence similarity 110 member A
gene14905_FANCF	Fanconi anemia complementation group F
gene14911_LOC110086057	zinc transporter ZIP11-like
gene14913_COG1	component of oligomeric golgi complex 1
gene14918_SDK2	sidekick cell adhesion molecule 2
gene14919_LOC110086055	protein sidekick-2-like
gene14921_SOX2	SRY-box 2
gene14924_ATP11B	ATPase phospholipid transporting 11B (putative)
gene14927_LAMP3	lysosomal associated membrane protein 3
gene14928_LOC110086066	guanine nucleotide exchange factor DBS-like
gene14929_MCF2L2	MCF.2 cell line derived transforming sequence-like 2
gene14944_CSF1R	colony stimulating factor 1 receptor
gene14945_PDGFRB	platelet derived growth factor receptor beta
gene14947_SLC6A7	solute carrier family 6 member 7
gene14954_SYNPO	synaptopodin
gene14955_PAPOLG	poly(A) polymerase gamma
gene14968_ARL4C	ADP ribosylation factor like GTPase 4C
gene14970_TRPM8	transient receptor potential cation channel subfamily M member 8
gene14978_JAG1	jagged 1
gene14982_CPNE4	copine 4
gene14988_LOC110086130	collagen alpha-6(VI) chain-like
gene14990_COL6A6	collagen type VI alpha 6 chain
gene15002_CATSPER4	cation channel sperm associated 4
gene15007_LOC110086169	discoidin
gene15016_ZDHHC18	zinc finger DHHC-type containing 18
gene15017_PIGV	phosphatidylinositol glycan anchor biosynthesis class V
gene15020_RPS6KA1	ribosomal protein S6 kinase A1
gene15026_LOC110086200	veficolin-1-like
gene15040_FADS2	fatty acid desaturase 2
gene15050_MYRF	myelin regulatory factor
gene15061_LOC110086229	bromodomain adjacent to zinc finger domain protein 2B-like
gene15076_MMP9	matrix metallopeptidase 9
gene15079_CD40	CD40 molecule
gene15080_CDH22	cadherin 22
gene15084_DDX27	DEAD-box helicase 27
gene15095_LOC110086231	lysophosphatidic acid receptor 6-like
gene15103_IDUA	iduronidase
gene15105_LOC110086259	purpurin
gene15108_PLBD2	phospholipase B domain containing 2
gene15123_HSPB8	heat shock protein family B (small) member 8
gene15140_CDC7	cell division cycle 7
gene15146_EPHX4	epoxide hydrolase 4
gene15150_RPAP2	RNA polymerase II associated protein 2
gene15156_LOC110086331	UDP-glucuronosyltransferase 2A2-like
gene1516_AGPAT4	1-acylglycerol-3-phosphate O-acyltransferase 4
gene15167_PARM1	prostate androgen-regulated mucin-like protein 1
gene15168_CDKL2	cyclin dependent kinase like 2
gene15171_SH2D4A	SH2 domain containing 4A
gene15180_FOXI3	forkhead box I3
gene15181_LOC110086342	uncharacterized LOC110086342
gene15189_CLEC14A	C-type lectin domain containing 14A
gene1520_SLC22A3	solute carrier family 22 member 3
gene15217_ORAI3	ORAI calcium release-activated calcium modulator 3
gene1522_LOC110087397	solute carrier family 22 member 2-like
gene15221_STX4	syntaxin 4
gene15222_LOC110086393	perforin-1-like
gene15225_LOC110086391	serine protease 53-like
gene15235_PRSS8	protease
gene15254_FKBP6	FK506 binding protein 6
gene15256_CPED1	cadherin like and PC-esterase domain containing 1
gene15293_LOC110086484	zinc finger and SCAN domain-containing protein 23-like
gene15296_LIG1	DNA ligase 1
gene15301_LOC110086486	zinc finger protein 883-like
gene15302_LOC110086469	tubulin polymerization-promoting protein family member 2-like
gene15303_NDRG2	NDRG family member 2
gene15305_LOC110086449	von Willebrand factor A domain-containing protein 5A-like
gene15308_LOC110086466	erythroblast NAD(P)(+)--arginine ADP-ribosyltransferase-like
gene15327_IGLON5	IgLON family member 5
gene15329_LOC110086508	sialic acid-binding Ig-like lectin 10
gene15331_LOC110086503	C3a anaphylatoxin chemotactic receptor-like
gene1534_ACAT2	acetyl-CoA acetyltransferase 2
gene15340_HAS1	hyaluronan synthase 1
gene15344_LOC110086531	protein BTG3-like
gene15351_DMBX1	diencephalon/mesencephalon homeobox 1
gene15370_CD34	CD34 molecule
gene15379_ZNF423	zinc finger protein 423
gene15386_NKD1	naked cuticle homolog 1
gene15388_CYLD	CYLD lysine 63 deubiquitinase
gene1539_TAGAP	T-cell activation RhoGTPase activating protein
gene15390_SALL1	spalt like transcription factor 1
gene15397_TTC7B	tetratricopeptide repeat domain 7B
gene15401_KCNK13	potassium two pore domain channel subfamily K member 13
gene15405_KIAA1549L	KIAA1549 like
gene15414_LOC110086612	putative N-acetyltransferase 8B
gene15420_PRADC1	protease associated domain containing 1
gene15424_ALMS1	ALMS1
gene15425_LOC110086601	disintegrin and metalloproteinase domain-containing protein 33-like
gene1543_SYTL3	synaptotagmin like 3
gene15433_TMEM42	transmembrane protein 42
gene15441_LOC110086644	PCTP-like protein
gene15445_LPAR4	lysophosphatidic acid receptor 4
gene15447_LOC110086629	putative P2Y purinoceptor 10
gene15468_FOXD3	forkhead box D3
gene15484_PDE1A	phosphodiesterase 1A
gene15489_SLC22A5	solute carrier family 22 member 5
gene15492_P4HA2	prolyl 4-hydroxylase subunit alpha 2
gene15495_FNIP1	folliculin interacting protein 1
gene15501_SHISA9	shisa family member 9
gene15526_CCM2L	CCM2 like scaffolding protein
gene15531_DUSP15	dual specificity phosphatase 15
gene15533_FOXS1	forkhead box S1
gene15534_MYLK2	myosin light chain kinase 2
gene1554_ARID1B	AT-rich interaction domain 1B
gene15543_CCNG1	cyclin G1
gene15552_LOC110086747	histone-lysine N-methyltransferase PRDM9-like
gene15553_CD79A	CD79a molecule
gene15554_ARHGEF1	Rho guanine nucleotide exchange factor 1
gene15557_RABAC1	Rab acceptor 1
gene15559_GRIK5	glutamate ionotropic receptor kainate type subunit 5
gene1556_CD96	CD96 molecule
gene1557_PLCXD2	phosphatidylinositol specific phospholipase C X domain containing 2
gene15581_TSPAN15	tetraspanin 15
gene15595_RUFY2	RUN and FYVE domain containing 2
gene15607_ARHGEF16	Rho guanine nucleotide exchange factor 16
gene15612_LOC110086824	transmembrane matrix receptor MUP-4-like
gene15613_CCDC27	coiled-coil domain containing 27
gene15620_P3H1	prolyl 3-hydroxylase 1
gene15631_PPIB	peptidylprolyl isomerase B
gene15633_PCLAF	PCNA clamp associated factor
gene15637_RBPMS2	RNA binding protein with multiple splicing 2
gene1564_LOC110088024	OX-2 membrane glycoprotein-like
gene15654_ISL2	ISL LIM homeobox 2
gene15656_LOC110086873	carbonic anhydrase 2-like
gene15675_LSM14B	LSM family member 14B
gene15681_ANP32A	acidic nuclear phosphoprotein 32 family member A
gene15684_ITGA11	integrin subunit alpha 11
gene15692_PRCP	prolylcarboxypeptidase
gene15696_ANKRD42	ankyrin repeat domain 42
gene15700_WFIKKN1	WAP
gene15712_LOC110086928	noggin-2-like
gene15720_LRRC4B	leucine rich repeat containing 4B
gene15721_LOC110086948	zinc finger BED domain-containing protein 1-like
gene15726_SYT3	synaptotagmin 3
gene15728_FAM71E1	family with sequence similarity 71 member E1
gene15732_POLD1	DNA polymerase delta 1
gene15741_ITGA4	integrin subunit alpha 4
gene15746_PPP1R1C	protein phosphatase 1 regulatory inhibitor subunit 1C
gene15752_DTNB	dystrobrevin beta
gene15754_DPYSL5	dihydropyrimidinase like 5
gene15757_AGBL5	ATP/GTP binding protein like 5
gene15769_UCN	urocortin
gene15773_SLC30A3	solute carrier family 30 member 3
gene15781_IFT172	intraflagellar transport 172
gene15785_GCKR	glucokinase regulator
gene15811_PTX4	pentraxin 4
gene15813_PLA2G10	phospholipase A2 group X
gene1582_GABRR3	gamma-aminobutyric acid type A receptor rho3 subunit
gene15820_ATF7IP2	activating transcription factor 7 interacting protein 2
gene15821_EMP2	epithelial membrane protein 2
gene15825_CIITA	class II major histocompatibility complex transactivator
gene15838_LYPLAL1	lysophospholipase like 1
gene1585_LOC110088286	myelin protein zero-like protein 1
gene15857_MTIF2	mitochondrial translational initiation factor 2
gene1586_LOC110088664	myelin protein zero-like protein 1
gene15863_SPTBN1	spectrin beta
gene15867_LOC110087113	disks large homolog 1
gene15870_LOC110087095	D-beta-hydroxybutyrate dehydrogenase
gene15876_FAM43A	family with sequence similarity 43 member A
gene15882_OPA1	OPA1
gene15884_LOC110087105	probable cation-transporting ATPase 13A5
gene15885_LOC110087106	probable cation-transporting ATPase 13A5
gene15887_EPS8	epidermal growth factor receptor pathway substrate 8
gene1589_RCSD1	RCSD domain containing 1
gene15891_MGST1	microsomal glutathione S-transferase 1
gene15894_LOC110087135	cilia- and flagella-associated protein 70-like
gene159_FUCA2	fucosidase
gene15900_LOC110087129	galanin receptor type 2-like
gene15906_PPL	periplakin
gene15918_ABAT	4-aminobutyrate aminotransferase
gene15928_ARFGAP3	ADP ribosylation factor GTPase activating protein 3
gene15929_A4GALT	alpha 1
gene15933_LINGO1	leucine rich repeat and Ig domain containing 1
gene15938_RCN2	reticulocalbin 2
gene15943_CENPF	centromere protein F
gene15950_PDXDC1	pyridoxal dependent decarboxylase domain containing 1
gene15954_LOC110087195	myosin-16
gene1597_LOC110088694	uncharacterized LOC110088694
gene1598_LOC110088432	uncharacterized LOC110088432
gene15994_CPXM2	carboxypeptidase X
gene15999_SORBS1	sorbin and SH3 domain containing 1
gene16_HACE1	HECT domain and ankyrin repeat containing E3 ubiquitin protein ligase 1
gene1600_PTGFRN	prostaglandin F2 receptor inhibitor
gene16007_TMEM72	transmembrane protein 72
gene16011_DRGX	dorsal root ganglia homeobox
gene16017_TRRAP	transformation/transcription domain associated protein
gene16018_TMEM130	transmembrane protein 130
gene16021_SETD5	SET domain containing 5
gene1603_IGSF3	immunoglobulin superfamily member 3
gene1604_ADPRH	ADP-ribosylarginine hydrolase
gene16045_CFI	complement factor I
gene16048_MCUB	mitochondrial calcium uniporter dominant negative beta subunit
gene16050_COL25A1	collagen type XXV alpha 1 chain
gene16051_ETNPPL	ethanolamine-phosphate phospho-lyase
gene16052_OSTC	oligosaccharyltransferase complex non-catalytic subunit
gene1606_TIMMDC1	translocase of inner mitochondrial membrane domain containing 1
gene16063_LOC110087297	beta-D-xylosidase 1-like
gene16067_COL8A2	collagen type VIII alpha 2 chain
gene16083_TNFAIP6	TNF alpha induced protein 6
gene16094_TNFAIP2	TNF alpha induced protein 2
gene16106_TDRD9	tudor domain containing 9
gene1611_ACP6	acid phosphatase 6
gene16113_B4GALT1	beta-1
gene16129_LOC110087369	1-phosphatidylinositol 4
gene1613_GJA5	gap junction protein alpha 5
gene16139_PIGL	phosphatidylinositol glycan anchor biosynthesis class L
gene16148_LOC110087419	integrin alpha-E-like
gene16149_P2RX5	purinergic receptor P2X 5
gene16150_EMC6	ER membrane protein complex subunit 6
gene16151_CTNS	cystinosin
gene16156_ASPA	aspartoacylase
gene16158_TMEM211	transmembrane protein 211
gene1617_HTR1F	5-hydroxytryptamine receptor 1F
gene16170_GEMIN4	gem nuclear organelle associated protein 4
gene16178_LOC110087430	centriolin-like
gene16181_LOC110087473	TNF receptor-associated factor 1-like
gene16186_KCNT1	potassium sodium-activated channel subfamily T member 1
gene16195_WDR31	WD repeat domain 31
gene1620_VGLL3	vestigial like family member 3
gene16209_RNF208	ring finger protein 208
gene16212_TPRN	taperin
gene16220_CCDC183	coiled-coil domain containing 183
gene16226_TRAF2	TNF receptor associated factor 2
gene16229_LOC110087472	lipocalin-like
gene16243_CRACR2A	calcium release activated channel regulator 2A
gene16270_BEST2	bestrophin 2
gene16273_LOC110087527	glutamate receptor ionotropic
gene16285_CPNE6	copine 6
gene16288_SPOCD1	SPOC domain containing 1
gene16290_COL16A1	collagen type XVI alpha 1 chain
gene16295_CDH9	cadherin 9
gene16297_LOC110087553	EH domain-containing protein 3-like
gene16303_ITPKB	inositol-trisphosphate 3-kinase B
gene1631_TOX	thymocyte selection associated high mobility group box
gene16310_AMOTL1	angiomotin like 1
gene16314_FAM76B	family with sequence similarity 76 member B
gene16320_LOC110087581	DEP domain-containing mTOR-interacting protein-like
gene16321_COL20A1	collagen type XX alpha 1 chain
gene16326_PTK6	protein tyrosine kinase 6
gene16329_LOC110087590	putative N-acetylated-alpha-linked acidic dipeptidase
gene1634_RAB2A	RAB2A
gene16340_HERC4	HECT and RLD domain containing E3 ubiquitin protein ligase 4
gene16345_TIGD1	tigger transposable element derived 1
gene16347_CCDC81	coiled-coil domain containing 81
gene16349_PRSS23	protease
gene16354_POLR3A	RNA polymerase III subunit A
gene16371_CHD8	chromodomain helicase DNA binding protein 8
gene16373_RPGRIP1	retinitis pigmentosa GTPase regulator interacting protein 1
gene16426_LOC110087657	uncharacterized LOC110087657
gene16439_CLDN15	claudin 15
gene16440_LOC110087638	dnaJ homolog subfamily C member 3-like
gene16460_VWA3B	von Willebrand factor A domain containing 3B
gene16464_INPP4A	inositol polyphosphate-4-phosphatase type I A
gene1647_LOC110089029	25-hydroxycholesterol 7-alpha-hydroxylase
gene16475_CHD3	chromodomain helicase DNA binding protein 3
gene16480_DNAH2	dynein axonemal heavy chain 2
gene16490_ZBTB4	zinc finger and BTB domain containing 4
gene16493_GRK1	G protein-coupled receptor kinase 1
gene16494_ATP1B2	ATPase Na+/K+ transporting subunit beta 2
gene16498_VSTM4	V-set and transmembrane domain containing 4
gene16523_UVRAG	UV radiation resistance associated
gene16524_DGAT2	diacylglycerol O-acyltransferase 2
gene16526_MAP6	microtubule associated protein 6
gene16530_SLC7A7	solute carrier family 7 member 7
gene16534_REM2	RRAD and GEM like GTPase 2
gene16545_SLC7A8	solute carrier family 7 member 8
gene16549_PPP1R3E	protein phosphatase 1 regulatory subunit 3E
gene16551_SLC22A17	solute carrier family 22 member 17
gene16558_ZFHX2	zinc finger homeobox 2
gene16560_AP1G2	adaptor related protein complex 1 gamma 2 subunit
gene16564_CARMIL3	capping protein regulator and myosin 1 linker 3
gene16567_NPBWR2	neuropeptides B and W receptor 2
gene16569_MYT1	myelin transcription factor 1
gene16570_PCMTD2	protein-L-isoaspartate (D-aspartate) O-methyltransferase domain containing 2
gene16571_LOC110087847	peroxidasin homolog
gene16573_PLEKHH2	pleckstrin homology
gene16576_KCNH5	potassium voltage-gated channel subfamily H member 5
gene16577_RHOJ	ras homolog family member J
gene16603_CBLB	Cbl proto-oncogene B
gene16609_LOC110087901	calcium-binding and coiled-coil domain-containing protein 2-like
gene16614_HOXB8	homeobox B8
gene16626_SKAP1	src kinase associated phosphoprotein 1
gene16629_LOC110087916	uncharacterized LOC110087916
gene16660_TMA16	translation machinery associated 16 homolog
gene16661_MARCH1	membrane associated ring-CH-type finger 1
gene16675_LOC110087969	melatonin receptor type 1A-like
gene16678_ATOX1	antioxidant 1 copper chaperone
gene16683_EPS8L3	EPS8 like 3
gene16689_KCNC4	potassium voltage-gated channel subfamily C member 4
gene16698_LOC110087981	potassium voltage-gated channel subfamily A member 3-like
gene1670_LOC110089268	zinc finger MYM-type protein 5-like
gene16708_MAP2K5	mitogen-activated protein kinase kinase 5
gene1671_TCF24	transcription factor 24
gene16717_EPHB3	EPH receptor B3
gene1672_PPP1R42	protein phosphatase 1 regulatory subunit 42
gene16738_LOC110088018	L-amino-acid oxidase-like
gene16740_LOC110088020	L-amino-acid oxidase-like
gene16744_LOC110088022	L-amino-acid oxidase-like
gene16746_LOC110088058	histone H2B.5-like
gene16750_LOC110088023	zinc finger protein 692-like
gene1677_CPA6	carboxypeptidase A6
gene16790_PAPLN	papilin
gene16794_LOC110088099	acyl-coenzyme A thioesterase 1-like
gene16805_ANKRD34A	ankyrin repeat domain 34A
gene16811_F11R	F11 receptor
gene16812_ITGA10	integrin subunit alpha 10
gene16818_TSTD1	thiosulfate sulfurtransferase like domain containing 1
gene16821_KLHDC9	kelch domain containing 9
gene16823_NECTIN4	nectin cell adhesion molecule 4
gene16838_NHLH1	nescient helix-loop-helix 1
gene16843_XPC	XPC complex subunit
gene16844_LOC110088149	DNA repair protein complementing XP-C cells-like
gene16855_HPRT1	hypoxanthine phosphoribosyltransferase 1
gene16857_LOC110088166	uncharacterized LOC110088166
gene16870_LOC110088170	transmembrane 9 superfamily member 2-like
gene16874_CNBD2	cyclic nucleotide binding domain containing 2
gene16876_WDR12	WD repeat domain 12
gene16878_FAM117B	family with sequence similarity 117 member B
gene16886_VSTM2A	V-set and transmembrane domain containing 2A
gene16922_PANK4	pantothenate kinase 4
gene16923_LOC110088236	transcription factor HES-5-like
gene16927_MMEL1	membrane metalloendopeptidase like 1
gene16929_DOCK4	dedicator of cytokinesis 4
gene16931_IFRD1	interferon related developmental regulator 1
gene16945_LOC110088292	arachidonate 15-lipoxygenase B-like
gene16988_TINF2	TERF1 interacting nuclear factor 2
gene16993_TSSK4	testis specific serine kinase 4
gene16996_REC8	REC8 meiotic recombination protein
gene16997_IRF9	interferon regulatory factor 9
gene17004_CAVIN2	caveolae associated protein 2
gene17005_TMEFF2	transmembrane protein with EGF like and two follistatin like domains 2
gene17011_EYA3	EYA transcriptional coactivator and phosphatase 3
gene17012_XKR8	XK related 8
gene17013_SMPDL3B	sphingomyelin phosphodiesterase acid like 3B
gene17017_STX12	syntaxin 12
gene17032_RAB28	RAB28
gene17044_PKMYT1	protein kinase
gene17066_CALCRL	calcitonin receptor like receptor
gene1707_KIF19	kinesin family member 19
gene1708_BTBD17	BTB domain containing 17
gene17093_SYTL1	synaptotagmin like 1
gene17094_MAP3K6	mitogen-activated protein kinase kinase kinase 6
gene17095_FCN3	ficolin 3
gene1710_GPRC5C	G protein-coupled receptor class C group 5 member C
gene17109_SGSM2	small G protein signaling modulator 2
gene17115_NOS2	nitric oxide synthase 2
gene17119_LOC110088449	ephrin type-A receptor 5
gene17124_ATP8B2	ATPase phospholipid transporting 8B2
gene17125_AQP10	aquaporin 10
gene17140_LOC110088463	protein S100-A4-like
gene17145_S100A14	S100 calcium binding protein A14
gene17149_LOC110088492	mothers against decapentaplegic homolog 4-like
gene1715_FAAP100	Fanconi anemia core complex associated protein 100
gene17159_DENND4B	DENN domain containing 4B
gene1716_FSCN2	fascin actin-bundling protein 2
gene17170_DSE	dermatan sulfate epimerase
gene17172_TRAPPC3L	trafficking protein particle complex 3 like
gene17175_LOC110088500	amine sulfotransferase-like
gene17191_AXL	AXL receptor tyrosine kinase
gene17198_BCKDHA	branched chain keto acid dehydrogenase E1
gene17202_LOC110088518	homeobox protein otx5
gene17204_LRRC32	leucine rich repeat containing 32
gene17205_PTPRJ	protein tyrosine phosphatase
gene17206_PTPN5	protein tyrosine phosphatase
gene17207_IGSF22	immunoglobulin superfamily member 22
gene17217_MYO7A	myosin VIIA
gene17227_KCTD14	potassium channel tetramerization domain containing 14
gene17240_LOC110088581	putative N-acetylated-alpha-linked acidic dipeptidase
gene17244_CDCA7	cell division cycle associated 7
gene17245_MAP3K20	mitogen-activated protein kinase kinase kinase 20
gene17246_RAPGEF4	Rap guanine nucleotide exchange factor 4
gene17247_RRAD	RRAD
gene17248_TPPP3	tubulin polymerization promoting protein family member 3
gene17251_LOC110088604	F-box/LRR-repeat protein 2-like
gene17254_EXOC3L1	exocyst complex component 3 like 1
gene1726_LOC110091350	calmodulin-like
gene17268_KLHL4	kelch like family member 4
gene1727_AATK	apoptosis associated tyrosine kinase
gene17281_CLMN	calmin
gene17289_MAPK4	mitogen-activated protein kinase 4
gene17294_SGCG	sarcoglycan gamma
gene17297_MIPEP	mitochondrial intermediate peptidase
gene17299_SPATA13	spermatogenesis associated 13
gene17323_CUL1	cullin 1
gene17324_CNTNAP2	contactin associated protein-like 2
gene17325_SLC4A4	solute carrier family 4 member 4
gene17330_NPFFR2	neuropeptide FF receptor 2
gene17333_LOC110088700	golgin subfamily A member 6-like protein 2
gene1734_ENDOV	endonuclease V
gene17346_APOM	apolipoprotein M
gene17350_LOC110088706	von Willebrand factor A domain-containing protein 7-like
gene17352_LST1	leukocyte specific transcript 1
gene17357_CACNG5	calcium voltage-gated channel auxiliary subunit gamma 5
gene17358_PRKCA	protein kinase C alpha
gene17364_ITFG2	integrin alpha FG-GAP repeat containing 2
gene1737_SGSH	N-sulfoglucosamine sulfohydrolase
gene17371_SH3BP2	SH3 domain binding protein 2
gene17374_MFSD10	major facilitator superfamily domain containing 10
gene17375_IGFBP1	insulin like growth factor binding protein 1
gene17384_ARMC9	armadillo repeat containing 9
gene17388_IQCG	IQ motif containing G
gene17391_FYTTD1	forty-two-three domain containing 1
gene17398_FKBP9	FK506 binding protein 9
gene17406_TXNDC16	thioredoxin domain containing 16
gene17408_ERO1A	endoplasmic reticulum oxidoreductase 1 alpha
gene1741_TBC1D16	TBC1 domain family member 16
gene17412_FERMT2	fermitin family member 2
gene17413_DDHD1	DDHD domain containing 1
gene17414_TRIM9	tripartite motif containing 9
gene17416_ABHD12B	abhydrolase domain containing 12B
gene17421_PCSK2	proprotein convertase subtilisin/kexin type 2
gene17427_PDE3A	phosphodiesterase 3A
gene17428_SLCO1C1	solute carrier organic anion transporter family member 1C1
gene17429_SLCO1B3	solute carrier organic anion transporter family member 1B3
gene17430_LOC110088803	solute carrier organic anion transporter family member 1C1-like
gene17444_SRPRA	SRP receptor alpha subunit
gene17445_FAM118B	family with sequence similarity 118 member B
gene17453_CALD1	caldesmon 1
gene17455_LOC110088824	aldose reductase-like
gene17468_MINDY4	MINDY lysine 48 deubiquitinase 4
gene17471_ADCYAP1R1	ADCYAP receptor type I
gene17476_LOC110088860	C-factor-like
gene17483_ENKD1	enkurin domain containing 1
gene17484_CUNH16orf86	chromosome unknown C16orf86 homolog
gene17495_LOC110088872	cytochrome P450 2J6-like
gene17496_LOC110088882	cytochrome P450 2J1-like
gene1750_C1QTNF1	C1q and TNF related 1
gene1751_CANT1	calcium activated nucleotidase 1
gene17511_MGLL	monoglyceride lipase
gene17513_SEC61A1	Sec61 translocon alpha 1 subunit
gene17520_LOC110088903	ephrin type-B receptor 5
gene1753_TIMP2	TIMP metallopeptidase inhibitor 2
gene17530_LOC110088908	follicle-stimulating hormone receptor-like
gene17534_PANX3	pannexin 3
gene17538_DDX25	DEAD-box helicase 25
gene17539_VSIG10L2	V-set and immunoglobulin domain containing 10 like 2
gene17564_LOC110088946	bactericidal permeability-increasing protein-like
gene17565_KIAA1755	KIAA1755 ortholog
gene17575_CCDC60	coiled-coil domain containing 60
gene17581_LOC110088980	interleukin-2 receptor subunit alpha-like
gene17582_LOC110088978	endonuclease domain-containing 1 protein-like
gene17589_MMP15	matrix metallopeptidase 15
gene17607_KLHL11	kelch like family member 11
gene17610_LOC110089003	solute carrier family 23 member 1-like
gene17611_LOC110089012	uncharacterized LOC110089012
gene17619_ANO4	anoctamin 4
gene17621_C2CD6	C2 calcium dependent domain containing 6
gene17641_XPO5	exportin 5
gene17644_YIPF3	Yip1 domain family member 3
gene17645_LRRC73	leucine rich repeat containing 73
gene17652_FAM98A	family with sequence similarity 98 member A
gene17653_RASGRP3	RAS guanyl releasing protein 3
gene17655_IL1RAPL2	interleukin 1 receptor accessory protein like 2
gene17677_LOC110089072	interstitial collagenase-like
gene17682_LOC110089095	transmembrane protein 91-like
gene17684_ATP4A	ATPase H+/K+ transporting alpha subunit
gene17685_TMEM147	transmembrane protein 147
gene17686_GAPDHS	glyceraldehyde-3-phosphate dehydrogenase
gene17692_LOC110089096	retroviral integration site protein Fli-1 homolog
gene17714_MGRN1	mahogunin ring finger 1
gene17722_VASN	vasorin
gene1773_GCGR	glucagon receptor
gene17742_PDIA2	protein disulfide isomerase family A member 2
gene17749_NIN	ninein
gene17756_LOC110089154	microtubule-associated protein futsch-like
gene17763_HPS1	HPS1
gene17764_PYROXD2	pyridine nucleotide-disulphide oxidoreductase domain 2
gene17765_LOXL4	lysyl oxidase like 4
gene17776_ANKRD2	ankyrin repeat domain 2
gene17788_RIBC1	RIB43A domain with coiled-coils 1
gene17793_LOC110089201	ceramide kinase-like
gene17794_G6PD	glucose-6-phosphate dehydrogenase
gene17798_ANGPTL6	angiopoietin like 6
gene17808_VSIG10	V-set and immunoglobulin domain containing 10
gene17813_PKNOX2	PBX/knotted 1 homeobox 2
gene17816_ELMOD3	ELMO domain containing 3
gene17817_RETSAT	retinol saturase
gene17820_ASTN2	astrotactin 2
gene17828_SPNS2	sphingolipid transporter 2
gene17835_LOC110089235	uroplakin-3b-like
gene17837_ZZEF1	zinc finger ZZ-type and EF-hand domain containing 1
gene17841_LOC110089248	methyl-CpG-binding domain protein 2
gene17849_RASL12	RAS like family 12
gene17850_KBTBD13	kelch repeat and BTB domain containing 13
gene17856_SV2B	synaptic vesicle glycoprotein 2B
gene17858_GALNT14	polypeptide N-acetylgalactosaminyltransferase 14
gene17865_FRMD5	FERM domain containing 5
gene17866_WDR76	WD repeat domain 76
gene17879_COL5A1	collagen type V alpha 1 chain
gene17902_NRM	nurim (nuclear envelope membrane protein)
gene17908_CUNH6orf136	chromosome unknown C6orf136 homolog
gene17918_LOC110089333	tyrosine-protein kinase receptor UFO-like
gene17920_LOC110089314	uncharacterized LOC110089314
gene17924_LOC110089345	interleukin-1 receptor antagonist protein-like
gene1793_RFNG	RFNG O-fucosylpeptide 3-beta-N-acetylglucosaminyltransferase
gene17934_PIGC	phosphatidylinositol glycan anchor biosynthesis class C
gene17952_LACTBL1	lactamase beta like 1
gene17953_EPHB2	EPH receptor B2
gene17962_LOC110089372	tripartite motif-containing protein 54-like
gene17970_GMEB2	glucocorticoid modulatory element binding protein 2
gene17980_AHCYL2	adenosylhomocysteinase like 2
gene17982_SMO	smoothened
gene17997_LOC110089425	cilia- and flagella-associated protein 70-like
gene17999_RHBDL1	rhomboid like 1
gene180_ARFGEF3	ARFGEF family member 3
gene18001_STUB1	STIP1 homology and U-box containing protein 1
gene18005_FBXL16	F-box and leucine rich repeat protein 16
gene1802_MBTD1	mbt domain containing 1
gene18032_BCAM	basal cell adhesion molecule (Lutheran blood group)
gene18033_NECTIN2	nectin cell adhesion molecule 2
gene18038_LOC110089440	uncharacterized LOC110089440
gene18046_LOC110089455	galectin-9-like
gene18054_KCTD9	potassium channel tetramerization domain containing 9
gene18055_LOC110089477	cell division cycle-associated protein 2-like
gene18069_PTK2B	protein tyrosine kinase 2 beta
gene18071_LOC110089498	uncharacterized LOC110089498
gene18079_LOC110089505	monocarboxylate transporter 2-like
gene18082_LOC110089508	mucin-5AC-like
gene18091_LOC110089522	C-factor-like
gene18096_LRP3	LDL receptor related protein 3
gene18106_ERCC6L	ERCC excision repair 6 like
gene18111_MEST	mesoderm specific transcript
gene18112_CEP41	centrosomal protein 41
gene18113_LOC110089538	carboxypeptidase A1-like
gene18114_LOC110089540	carboxypeptidase A1-like
gene18117_CPA2	carboxypeptidase A2
gene18121_METTL6	methyltransferase like 6
gene18123_MTURN	maturin
gene18130_CCNB1IP1	cyclin B1 interacting protein 1
gene18131_LOC110089570	perforin-1-like
gene18133_TEP1	telomerase associated protein 1
gene18152_LOC110089581	ribonuclease pancreatic-like
gene18158_CUNH2orf70	chromosome unknown C2orf70 homolog
gene18159_OTOF	otoferlin
gene18160_DRC1	dynein regulatory complex subunit 1
gene18161_LOC110089593	ERC protein 2-like
gene18164_LOC110089605	thrombomodulin-like
gene18165_CD93	CD93 molecule
gene1817_MYCBPAP	MYCBP associated protein
gene18178_ETHE1	ETHE1
gene18218_LOC110089646	secreted frizzled-related protein 2-like
gene18222_ATRN	attractin
gene18224_LOC110089659	cholesterol 24-hydroxylase-like
gene18228_CCNK	cyclin K
gene18236_LOC110089676	trypsin-like
gene18261_LYN	LYN proto-oncogene
gene18291_CRIP1	cysteine rich protein 1
gene18295_FAM78B	family with sequence similarity 78 member B
gene18298_CGRRF1	cell growth regulator with ring finger domain 1
gene183_TNFAIP3	TNF alpha induced protein 3
gene18308_ASMTL	acetylserotonin O-methyltransferase like
gene18314_LOC110089783	neurogenic locus notch homolog protein 4-like
gene18315_LOC110089772	vesicle-trafficking protein SEC22b-like
gene18317_LOC110089780	epidermal growth factor-like protein 8
gene18336_GPR22	G protein-coupled receptor 22
gene18354_LOC110089816	uncharacterized LOC110089816
gene18362_TBC1D24	TBC1 domain family member 24
gene18363_LOC110089827	major facilitator superfamily domain-containing protein 8-like
gene18367_CLCN2	chloride voltage-gated channel 2
gene18385_PLXND1	plexin D1
gene18391_MNAT1	MNAT1
gene18402_FOXJ1	forkhead box J1
gene18407_TNC	tenascin C
gene18415_LOC110089872	whirlin-like
gene18429_LOC110089894	digestive cysteine proteinase 2-like
gene18430_LOC110089887	tyrosine-protein kinase Fyn-like
gene18431_SLC28A3	solute carrier family 28 member 3
gene18434_APLP1	amyloid beta precursor like protein 1
gene18435_UPK1A	uroplakin 1A
gene18436_ARHGAP33	Rho GTPase activating protein 33
gene18439_HSPB6	heat shock protein family B (small) member 6
gene1844_PLXNC1	plexin C1
gene18458_LOC110089916	cytosolic phospholipase A2 gamma-like
gene18480_ADCY3	adenylate cyclase 3
gene18485_ZDHHC24	zinc finger DHHC-type containing 24
gene1849_NUDT4	nudix hydrolase 4
gene18491_SPTBN2	spectrin beta
gene185_LOC110071491	interferon gamma receptor 1-like
gene18504_SIPA1	signal-induced proliferation-associated 1
gene18508_ZC3H3	zinc finger CCCH-type containing 3
gene18514_KIF13B	kinesin family member 13B
gene1853_BTG1	BTG anti-proliferation factor 1
gene18535_SGCD	sarcoglycan delta
gene18539_SYT16	synaptotagmin 16
gene1855_DCN	decorin
gene18551_NKAIN4	sodium/potassium transporting ATPase interacting 4
gene18562_NGFR	nerve growth factor receptor
gene18567_LIPG	lipase G
gene18580_LOC110090068	BICD family-like cargo adapter 2
gene18588_DCTPP1	dCTP pyrophosphatase 1
gene18589_SEPT1	septin 1
gene18590_ITGAL	integrin subunit alpha L
gene18603_CUNH16orf58	chromosome unknown C16orf58 homolog
gene18604_SLC5A2	solute carrier family 5 member 2
gene18606_TRAK1	trafficking kinesin protein 1
gene18610_SLC6A2	solute carrier family 6 member 2
gene18622_NOS1	nitric oxide synthase 1
gene18625_LPP	LIM domain containing preferred translocation partner in lipoma
gene18626_HEG1	heart development protein with EGF like domains 1
gene18661_LOC110090152	interleukin-1 receptor type 1-like
gene18675_LOC110090160	zinc-binding protein A33-like
gene18678_LOC110090165	C-type lectin domain family 2 member B-like
gene18684_FCHSD2	FCH and double SH3 domains 2
gene1869_NTS	neurotensin
gene18691_LOC110090180	tenascin-X-like
gene18694_LOC110090181	zinc finger protein 883-like
gene18695_LOC110090189	neurogenic locus notch homolog protein 1-like
gene18704_UBE2U	ubiquitin conjugating enzyme E2 U (putative)
gene18706_BCAT1	branched chain amino acid transaminase 1
gene18711_LOC110090206	N-terminal EF-hand calcium-binding protein 1-like
gene1873_SLC6A15	solute carrier family 6 member 15
gene18741_TMEM64	transmembrane protein 64
gene18749_LOC110090243	glutathione S-transferase A4-like
gene18755_PRR5L	proline rich 5 like
gene18771_LONRF3	LON peptidase N-terminal domain and ring finger 3
gene18776_KCP	kielin/chordin-like protein
gene18779_LOC110090275	C-type lectin-like
gene18786_LOC110090285	CD209 antigen-like protein B
gene18788_ODF3B	outer dense fiber of sperm tails 3B
gene18789_LOC110090283	protein SCO2 homolog
gene1881_RARG	retinoic acid receptor gamma
gene1882_LOC110070389	nuclear receptor subfamily 1 group D member 2-like
gene18838_LOC110090339	zinc finger protein 32-like
gene1886_ESPL1	extra spindle pole bodies like 1
gene18927_SYNGR3	synaptogyrin 3
gene18929_NOXO1	NADPH oxidase organizer 1
gene18933_RPL3L	ribosomal protein L3 like
gene18938_CHTF18	chromosome transmission fidelity factor 18
gene18945_SLC37A2	solute carrier family 37 member 2
gene18946_TMEM218	transmembrane protein 218
gene18949_ISM1	isthmin 1
gene18959_LOC110090459	growth-regulated alpha protein-like
gene1896_LOC110070539	glycoprotein-N-acetylgalactosamine 3-beta-galactosyltransferase 1-A-like
gene1897_OS9	OS9
gene18982_LOC110090499	vitellogenin-like
gene18984_LOC110090496	multidrug resistance-associated protein 6-like
gene18985_LOC110090498	nodal modulator 1-like
gene18988_AHNAK	AHNAK nucleoprotein
gene1899_SLC26A10	solute carrier family 26 member 10
gene18994_PPP2R5B	protein phosphatase 2 regulatory subunit B'beta
gene18997_LOC110090516	alpha-1A adrenergic receptor-like
gene19001_LOC110090515	transcription factor COE2-like
gene19004_PTAR1	protein prenyltransferase alpha subunit repeat containing 1
gene19005_CUNH9orf135	chromosome unknown C9orf135 homolog
gene1901_ARHGEF25	Rho guanine nucleotide exchange factor 25
gene19011_FAM219B	family with sequence similarity 219 member B
gene19027_SELENOI	selenoprotein I
gene19031_SCARA3	scavenger receptor class A member 3
gene19034_LOC110090554	extracellular tyrosine-protein kinase PKDCC-like
gene19037_LOC110090558	ena/VASP-like protein
gene1905_KIF5A	kinesin family member 5A
gene19053_BAG1	BCL2 associated athanogene 1
gene19059_LOC110090599	uncharacterized LOC110090599
gene19066_TMEM259	transmembrane protein 259
gene19082_CDK20	cyclin dependent kinase 20
gene19085_LOC110090612	tetraspan membrane protein of hair cell stereocilia-like
gene19087_LOC110090606	keratin-associated protein 10-2-like
gene19089_PLP2	proteolipid protein 2
gene19099_LOC110090629	tomoregulin-2-like
gene19116_LOC110090645	zinc finger and SCAN domain-containing protein 31-like
gene19120_LOC110090648	fibrous sheath-interacting protein 2-like
gene19125_BEAN1	brain expressed associated with NEDD4 1
gene1913_GLI1	GLI family zinc finger 1
gene19137_SOX18	SRY-box 18
gene19142_LOC110090685	uncharacterized LOC110090685
gene1915_LOC110070913	inhibin beta C chain-like
gene19151_LOC110090695	urokinase plasminogen activator surface receptor-like
gene19158_LOC110090687	cell surface glycoprotein MUC18-like
gene19159_CADM4	cell adhesion molecule 4
gene19175_LOC110090712	free fatty acid receptor 3-like
gene19178_MPP4	membrane palmitoylated protein 4
gene1918_LOC110070933	NADH dehydrogenase [ubiquinone] 1 alpha subcomplex subunit 4-like 2
gene19185_LOC110090720	ras-associated and pleckstrin homology domains-containing protein 1-like
gene19190_LOC110090731	somatomedin-B and thrombospondin type-1 domain-containing protein-like
gene19193_LOC110090728	uncharacterized LOC110090728
gene1920_NXPH4	neurexophilin 4
gene19204_ARHGAP27	Rho GTPase activating protein 27
gene19226_LOC110090762	meckelin-like
gene19228_LOC110090768	beta-galactosidase-like
gene19230_CX3CR1	C-X3-C motif chemokine receptor 1
gene19239_BANF2	barrier to autointegration factor 2
gene19240_RRBP1	ribosome binding protein 1
gene19248_MYO15A	myosin XVA
gene19258_SLC5A10	solute carrier family 5 member 10
gene19278_LOC110090816	uncharacterized LOC110090816
gene19286_TRIB3	tribbles pseudokinase 3
gene19289_LOC110090826	purine nucleoside phosphorylase-like
gene19297_MFAP5	microfibrillar associated protein 5
gene19300_M6PR	mannose-6-phosphate receptor
gene19301_LOC110090846	ovostatin-like
gene19308_LOC110090853	dimethylaniline monooxygenase [N-oxide-forming] 5-like
gene19312_LOC110090859	dimethylaniline monooxygenase [N-oxide-forming] 2-like
gene19324_LOC110090877	gastric inhibitory polypeptide-like
gene19329_ABI3	ABI family member 3
gene19334_LANCL3	LanC like 3
gene19337_RIPK4	receptor interacting serine/threonine kinase 4
gene1934_GTSF1	gametocyte specific factor 1
gene19346_EFR3A	EFR3 homolog A
gene19353_NID2	nidogen 2
gene19355_LOC110090901	uncharacterized LOC110090901
gene19359_LOC110090907	BPI fold-containing family B member 4-like
gene19360_BPIFB4	BPI fold containing family B member 4
gene19361_LOC110090910	sulfotransferase family cytosolic 2B member 1-like
gene19364_LOC110090914	leucine-rich glioma-inactivated protein 1-like
gene19367_LOC110090915	FXYD domain-containing ion transport regulator 5-like
gene19368_SLC4A11	solute carrier family 4 member 11
gene19375_ASTN1	astrotactin 1
gene19378_RXRG	retinoid X receptor gamma
gene19385_LOC110090934	lanosterol synthase-like
gene19390_TNFSF13B	TNF superfamily member 13b
gene19396_LOC110090945	teneurin-4
gene194_PDE7B	phosphodiesterase 7B
gene19400_GPR132	G protein-coupled receptor 132
gene19402_LOC110090955	SERTA domain-containing protein 2-like
gene19407_MYRIP	myosin VIIA and Rab interacting protein
gene19414_CLIC1	chloride intracellular channel 1
gene19420_SLC39A4	solute carrier family 39 member 4
gene19425_TONSL	tonsoku like
gene1943_LOC110071300	E3 ubiquitin-protein ligase TRIM58-like
gene19430_KIFC2	kinesin family member C2
gene19439_LOC110090992	uncharacterized LOC110090992
gene19442_NOA1	nitric oxide associated 1
gene19545_LOC110091105	serine/threonine-protein kinase VRK2-like
gene1955_RDH8	retinol dehydrogenase 8 (all-trans)
gene19550_CDC42BPG	CDC42 binding protein kinase gamma
gene1957_COL5A3	collagen type V alpha 3 chain
gene19570_BRINP2	BMP/retinoic acid inducible neural specific 2
gene19575_RING1	ring finger protein 1
gene1958_OLFM2	olfactomedin 2
gene19582_RGL2	ral guanine nucleotide dissociation stimulator like 2
gene19591_LOC110091158	lanosterol synthase-like
gene19593_COL6A1	collagen type VI alpha 1 chain
gene19600_SLC41A3	solute carrier family 41 member 3
gene19632_LOC110091201	sulfotransferase 6B1-like
gene19643_LOC110091211	tyrosine-protein kinase Blk-like
gene19646_KCNK3	potassium two pore domain channel subfamily K member 3
gene19658_SLC25A44	solute carrier family 25 member 44
gene19669_XYLT2	xylosyltransferase 2
gene19674_LOC110091251	zinc finger protein RFP-like
gene19685_LOC110091256	zinc finger protein RFP-like
gene19692_TAF1D	TATA-box binding protein associated factor
gene19699_LRRC24	leucine rich repeat containing 24
gene197_MYB	MYB proto-oncogene
gene19703_LOC110091279	neural proliferation differentiation and control protein 1-like
gene19708_VARS	valyl-tRNA synthetase
gene19713_LOC110091290	zinc finger protein 239-like
gene19719_COLEC10	collectin subfamily member 10
gene1972_MVB12A	multivesicular body subunit 12A
gene19720_TNFRSF11B	TNF receptor superfamily member 11b
gene19725_LOC110091304	carcinoembryonic antigen-related cell adhesion molecule 5-like
gene19729_LAMC2	laminin subunit gamma 2
gene19760_LOC110091343	putative zinc finger protein 66
gene19771_SLC36A4	solute carrier family 36 member 4
gene19783_ERP27	endoplasmic reticulum protein 27
gene19789_CUNH7orf49	chromosome unknown C7orf49 homolog
gene1979_SLC27A1	solute carrier family 27 member 1
gene19796_LPCAT4	lysophosphatidylcholine acyltransferase 4
gene1980_PGLS	6-phosphogluconolactonase
gene19808_LOC110091398	maestro heat-like repeat-containing protein family member 7
gene19809_RASGRF1	Ras protein specific guanine nucleotide releasing factor 1
gene19810_CTSH	cathepsin H
gene19818_SPRY3	sprouty RTK signaling antagonist 3
gene19832_LOC110091427	cuticle collagen 2C-like
gene19855_ANPEP	alanyl aminopeptidase
gene19862_GDPGP1	GDP-D-glucose phosphorylase 1
gene19878_LOC110091475	rap1 GTPase-activating protein 1-like
gene19888_LOC110091485	IgGFc-binding protein-like
gene19889_LOC110091487	IgGFc-binding protein-like
gene19890_LOC110091491	IgGFc-binding protein-like
gene19896_LOC110091493	uncharacterized protein C4orf17 homolog
gene19914_LOC110091516	zinc finger and SCAN domain-containing protein 31-like
gene19922_LOC110091522	pancreatic alpha-amylase-like
gene19947_RADIL	Rap associating with DIL domain
gene1995_LOC110071823	gremlin-1-like
gene19954_CHST14	carbohydrate sulfotransferase 14
gene19966_LOC110091575	7-alpha-hydroxycholest-4-en-3-one 12-alpha-hydroxylase-like
gene19968_CCDC13	coiled-coil domain containing 13
gene19969_HHATL	hedgehog acyltransferase-like
gene1997_SLC13A3	solute carrier family 13 member 3
gene19971_ZBTB47	zinc finger and BTB domain containing 47
gene19973_MB21D2	Mab-21 domain containing 2
gene19985_LOC110091589	von Willebrand factor A domain-containing protein 5B2-like
gene19988_LOC110091594	PHD finger protein 23B-like
gene19989_ABCF3	ATP binding cassette subfamily F member 3
gene19998_ALG3	ALG3
gene19999_LOC110091601	von Willebrand factor A domain-containing protein 5B2-like
gene200_ALDH8A1	aldehyde dehydrogenase 8 family member A1
gene20007_LOC110091612	zinc finger protein 397-like
gene20010_LOC110091608	zinc finger protein 135-like
gene20019_LOC110091625	rab effector MyRIP-like
gene20037_LOC110091645	zinc finger and SCAN domain-containing protein 23-like
gene20054_SOX7	SRY-box 7
gene20059_ROBO4	roundabout guidance receptor 4
gene2006_PREX1	phosphatidylinositol-3
gene20061_LZTS3	leucine zipper tumor suppressor family member 3
gene20063_UBOX5	U-box domain containing 5
gene20065_LOC110091677	neurophysin 1-like
gene2007_ARFGEF2	ADP ribosylation factor guanine nucleotide exchange factor 2
gene20078_LFNG	LFNG O-fucosylpeptide 3-beta-N-acetylglucosaminyltransferase
gene20081_ADCY4	adenylate cyclase 4
gene20093_LGALS3	galectin 3
gene20094_LOC110091704	MAM domain-containing glycosylphosphatidylinositol anchor protein 2-like
gene201_SGK1	serum/glucocorticoid regulated kinase 1
gene2010_LOC110071826	retinol dehydrogenase 10-like
gene20107_SLC7A9	solute carrier family 7 member 9
gene20114_NUDT7	nudix hydrolase 7
gene2013_KCNB1	potassium voltage-gated channel subfamily B member 1
gene20136_LOC110091754	uncharacterized LOC110091754
gene20139_LOC110091753	PDZ domain-containing protein 9-like
gene20140_SF3B2	splicing factor 3b subunit 2
gene20150_RIN1	Ras and Rab interactor 1
gene20154_ADGRF5	adhesion G protein-coupled receptor F5
gene20156_RIMKLB	ribosomal modification protein rimK like family member B
gene20157_LOC110069780	alpha-2-macroglobulin-like protein 1
gene20158_LOC110069783	kyphoscoliosis peptidase-like
gene20160_HMX1	H6 family homeobox 1
gene20183_LOC110069806	angiopoietin-related protein 7-like
gene20185_TRIM35	tripartite motif containing 35
gene20188_LOC110069815	uncharacterized protein KIAA1841-like
gene20242_LOC110069868	probable guanine nucleotide exchange factor MCF2L2
gene20247_LOC110069873	C-type lectin domain family 2 member D-like
gene20314_LOC110069945	zinc finger protein 568-like
gene20335_LOC110069966	zinc finger protein OZF-like
gene20346_LOC110069978	zinc finger protein 2 homolog
gene20348_LOC110069984	uncharacterized LOC110069984
gene20352_KCNK10	potassium two pore domain channel subfamily K member 10
gene20379_LOC110070020	keratin
gene20383_LOC110070018	keratin
gene20408_LOC110070044	glutathione S-transferase theta-1-like
gene2041_TSHZ2	teashirt zinc finger homeobox 2
gene20413_LOC110070048	olfactomedin-4-like
gene20428_SYTL5	synaptotagmin like 5
gene20446_METTL17	methyltransferase like 17
gene20447_LOC110070083	ribonuclease-like
gene20449_LOC110070088	deoxyribodipyrimidine photo-lyase-like
gene2045_BCAS1	breast carcinoma amplified sequence 1
gene20452_LOC110070089	uncharacterized LOC110070089
gene20455_WDHD1	WD repeat and HMG-box DNA binding protein 1
gene2046_LOC110071817	1
gene20479_LOC110070118	serine protease 55-like
gene20480_LOC110070120	uncharacterized LOC110070120
gene20482_LOC110070121	cationic trypsin-like
gene20487_LOC110070124	putative cation exchanger C521.04c
gene20488_TMEM209	transmembrane protein 209
gene20489_LOC110070127	uncharacterized LOC110070127
gene20490_LOC110070132	H-2 class I histocompatibility antigen
gene20499_LOC110070140	GREB1-like protein
gene20505_LOC110070144	glutathione S-transferase kappa 1-like
gene20536_DAD1	defender against cell death 1
gene2054_PARP9	poly(ADP-ribose) polymerase family member 9
gene20549_XKR6	XK related 6
gene20563_CDC42EP2	CDC42 effector protein 2
gene20584_LOC110070227	branchpoint-bridging protein-like
gene20598_PFKFB2	6-phosphofructo-2-kinase/fructose-2
gene20604_LOC110070250	butyrophilin subfamily 1 member A1-like
gene20605_LOC110070256	galectin-1-like
gene20606_LOC110070254	vespryn-21-like
gene20622_NCAPH2	non-SMC condensin II complex subunit H2
gene20623_LMF2	lipase maturation factor 2
gene20625_GOLGB1	golgin B1
gene20634_CHEK1	checkpoint kinase 1
gene20644_NMT2	N-myristoyltransferase 2
gene20649_EVL	Enah/Vasp-like
gene20658_LOC110070311	S-adenosylmethionine synthase-like
gene20663_LOC110070318	cytochrome b561
gene20666_SLC51A	solute carrier family 51 alpha subunit
gene20686_LOC110070345	dual 3'
gene20687_LOC110070344	cytochrome c iso-1/iso-2-like
gene20689_LAMB1	laminin subunit beta 1
gene20707_LOC110070366	voltage-dependent T-type calcium channel subunit alpha-1H-like
gene20720_LOC110070379	neurexin-1-like
gene20735_LOC110070400	aldo-keto reductase family 1 member C3 homolog
gene20751_LOC110070410	zinc finger protein RFP-like
gene20761_LOC110070422	E3 ubiquitin-protein ligase TRIM39-like
gene20762_LOC110070423	uncharacterized LOC110070423
gene20780_LOC110070441	reticulon-1-like
gene20787_FDFT1	farnesyl-diphosphate farnesyltransferase 1
gene208_SLC18B1	solute carrier family 18 member B1
gene20809_POF1B	premature ovarian failure
gene20817_LOC110070480	glucagon receptor-like
gene2082_ACMSD	aminocarboxymuconate semialdehyde decarboxylase
gene20820_CUNH16orf71	chromosome unknown C16orf71 homolog
gene20837_LOC110070500	H-2 class I histocompatibility antigen
gene2084_MAP3K19	mitogen-activated protein kinase kinase kinase 19
gene20845_LOC110070508	tumor necrosis factor receptor superfamily member 1B-like
gene20849_LOC110070514	class I histocompatibility antigen
gene20850_LOC110070513	major histocompatibility complex class I-related gene protein-like
gene20851_NR0B2	nuclear receptor subfamily 0 group B member 2
gene20853_KDF1	keratinocyte differentiation factor 1
gene2086_ZRANB3	zinc finger RANBP2-type containing 3
gene20860_LOC110070524	zinc finger protein 202-like
gene2087_R3HDM1	R3H domain containing 1
gene20875_LOC110070543	alpha-1
gene2089_LCT	lactase
gene20895_LOC110070568	acrosin-like
gene20896_LOC110070571	acrosin-like
gene20898_LOC110070569	rab-like protein 2A
gene20904_ECEL1	endothelin converting enzyme like 1
gene20912_LOC110070582	hemicentin-2-like
gene20933_APPL2	adaptor protein
gene20940_LOC110070610	intercellular adhesion molecule 5-like
gene20943_LOC110070614	C-reactive protein-like
gene20953_PIGU	phosphatidylinositol glycan anchor biosynthesis class U
gene20979_ITIH5	inter-alpha-trypsin inhibitor heavy chain family member 5
gene20983_VARS2	valyl-tRNA synthetase 2
gene20985_LOC110070657	uncharacterized LOC110070657
gene2099_ADARB2	adenosine deaminase
gene210_VNN1	vanin 1
gene21009_LOC110070682	disks large homolog 2-like
gene21036_LOC110070709	vomeronasal type-2 receptor 26-like
gene21044_CUNH14orf37	chromosome unknown C14orf37 homolog
gene21048_LOC110070722	fatty acid amide hydrolase-like
gene2107_VIPR2	vasoactive intestinal peptide receptor 2
gene2110_NCAPG2	non-SMC condensin II complex subunit G2
gene2112_PTPRN2	protein tyrosine phosphatase
gene21140_CCHCR1	coiled-coil alpha-helical rod protein 1
gene21148_LOC110070829	sulfotransferase 6B1-like
gene21154_LOC110070837	zinc finger protein RFP-like
gene21163_EFEMP1	EGF containing fibulin like extracellular matrix protein 1
gene21177_CDA	cytidine deaminase
gene21199_LOC110070886	vacuolar protein sorting-associated protein 29-like
gene21205_S1PR2	sphingosine-1-phosphate receptor 2
gene2122_RBM33	RNA binding motif protein 33
gene2123_CNPY1	canopy FGF signaling regulator 1
gene21245_LOC110070936	IgGFc-binding protein-like
gene2127_HTR5A	5-hydroxytryptamine receptor 5A
gene21270_LOC110070962	zinc finger and SCAN domain-containing protein 31-like
gene21278_LOC110070973	rootletin-like
gene21288_DRC7	dynein regulatory complex subunit 7
gene2129_DPP6	dipeptidyl peptidase like 6
gene21291_LOC110070985	H-2 class II histocompatibility antigen
gene21301_LOC110070997	glycine-rich cell wall structural protein 1-like
gene21319_LOC110071016	capping protein
gene21330_LOC110071027	C-type lectin domain family 2 member D-like
gene2135_PRKAG2	protein kinase AMP-activated non-catalytic subunit gamma 2
gene2136_RHEB	Ras homolog enriched in brain
gene21371_LOC110071071	protein brambleberry-like
gene21385_LOC110071085	speedy protein 1-B-like
gene21392_LOC110071093	L-threonine 3-dehydrogenase
gene21399_LOC110071102	venom factor-like
gene2141_CUNH9orf152	chromosome unknown C9orf152 homolog
gene21412_LOC110071116	inositol-trisphosphate 3-kinase B-like
gene21413_LOC110071117	autophagy-related protein 2 homolog A-like
gene21416_LOC110071121	cytochrome P450 2C19-like
gene2142_XYLB	xylulokinase
gene21425_LOC110071130	alpha-2-macroglobulin-like protein 1
gene21430_LOC110071136	alpha-2-macroglobulin-like
gene21432_LOC110071138	hydroperoxide isomerase ALOXE3-like
gene21433_LOC110071139	C-reactive protein-like
gene21475_LOC110071181	zinc finger protein 420-like
gene21476_ESAM	endothelial cell adhesion molecule
gene21484_LOC110071191	HLA class I histocompatibility antigen
gene21496_LOC110071203	vomeronasal type-2 receptor 26-like
gene21497_LOC110071204	alpha-2-macroglobulin-like
gene21504_LOC110071212	A.superbus venom factor 2-like
gene21512_LOC110071221	vomeronasal type-2 receptor 26-like
gene21516_LOC110071225	A.superbus venom factor 1-like
gene21531_LOC110071242	cytochrome P450 2F2-like
gene21532_LOC110071241	cytochrome P450 2J6-like
gene21538_LOC110071248	PHD finger protein 19-like
gene21545_LOC110071255	class I histocompatibility antigen
gene2155_SMNDC1	survival motor neuron domain containing 1
gene21555_LOC110071269	vomeronasal type-2 receptor 26-like
gene21560_LOC110071274	uncharacterized protein KIAA1841-like
gene21582_LOC110071296	zinc finger protein 239-like
gene21606_LOC110071322	serine/threonine-protein kinase pim-3-like
gene21609_LOC110071325	17-beta-hydroxysteroid dehydrogenase type 6-like
gene21613_LOC110071329	zinc finger protein 420-like
gene2163_ADRA2A	adrenoceptor alpha 2A
gene21635_LOC110071353	sulfotransferase family cytosolic 2B member 1-like
gene21636_LOC110071354	cytochrome P450 2H2-like
gene2164_GPAM	glycerol-3-phosphate acyltransferase
gene21668_LOC110071386	angiogenin-like
gene2167_ACSL5	acyl-CoA synthetase long-chain family member 5
gene21704_LOC110071427	C-reactive protein-like
gene21726_LOC110071452	zona pellucida sperm-binding protein 3-like
gene21735_LOC110071462	serine/threonine kinase-like domain-containing protein STKLD1
gene21758_LOC110071486	cytochrome P450 2D6-like
gene21763_LOC110071492	probable ATP-dependent RNA helicase DDX52
gene21769_LOC110071499	major histocompatibility complex class I-related gene protein-like
gene21817_LOC110071551	serine/threonine-protein kinase LMTK3-like
gene21826_LOC110071560	desmoplakin-like
gene21849_LOC110071585	presequence protease
gene2185_ABLIM1	actin binding LIM protein 1
gene21852_LOC110071588	H-2 class II histocompatibility antigen
gene21858_LOC110071595	DNA topoisomerase 2-alpha-like
gene21879_LOC110071618	general transcription factor IIH subunit 3-like
gene21885_LOC110071624	multidrug resistance-associated protein 9-like
gene21898_LOC110071638	importin-5-like
gene21908_LOC110071649	60S ribosomal protein L7a
gene21942_LOC110071684	gastrula zinc finger protein XlCGF49.1-like
gene21945_LOC110071687	HLA class II histocompatibility antigen
gene21955_LOC110071697	major histocompatibility complex class I-related gene protein-like
gene2196_LOC110072001	pancreatic triacylglycerol lipase-like
gene21974_LOC110071718	zinc finger protein 2 homolog
gene21977_LOC110071721	class II histocompatibility antigen
gene21990_LOC110071735	pseudouridylate synthase 7 homolog-like protein
gene2201_VAX1	ventral anterior homeobox 1
gene221_DPH3	diphthamide biosynthesis 3
gene2210_MAN2A1	mannosidase alpha class 2A member 1
gene2215_CAMK4	calcium/calmodulin dependent protein kinase IV
gene2236_LOC110072046	TIR domain-containing adapter molecule 2
gene225_BTD	biotinidase
gene2258_LOC110072196	basic salivary proline-rich protein 4-like
gene226_HACL1	2-hydroxyacyl-CoA lyase 1
gene227_COLQ	collagen like tail subunit of asymmetric acetylcholinesterase
gene2276_GGCX	gamma-glutamyl carboxylase
gene2283_DGUOK	deoxyguanosine kinase
gene2292_ADD2	adducin 2
gene2298_PCYOX1	prenylcysteine oxidase 1
gene2302_TGFA	transforming growth factor alpha
gene2303_GMCL1	germ cell-less
gene2314_ARHGAP25	Rho GTPase activating protein 25
gene2323_LGI3	leucine rich repeat LGI family member 3
gene2327_GPAT2	glycerol-3-phosphate acyltransferase 2
gene2328_ADRA2B	adrenoceptor alpha 2B
gene2330_DUSP2	dual specificity phosphatase 2
gene2338_NEURL3	neuralized E3 ubiquitin protein ligase 3
gene234_CPVL	carboxypeptidase
gene2346_LMAN2L	lectin
gene235_TRIL	TLR4 interactor with leucine rich repeats
gene2352_FAM178B	family with sequence similarity 178 member B
gene2360_LOC110072145	N-acetylglucosamine-6-sulfatase-like
gene2364_IKBKB	inhibitor of nuclear factor kappa B kinase subunit beta
gene2375_SFRP1	secreted frizzled related protein 1
gene2379_LOC110072230	disintegrin and metalloproteinase domain-containing protein 2-like
gene2380_LOC110072159	disintegrin and metalloproteinase domain-containing protein 32-like
gene2387_TACC1	transforming acidic coiled-coil containing protein 1
gene2388_FGFR1	fibroblast growth factor receptor 1
gene2389_LETM2	leucine zipper and EF-hand containing transmembrane protein 2
gene2391_BMP1	bone morphogenetic protein 1
gene2392_PHYHIP	phytanoyl-CoA 2-hydroxylase interacting protein
gene2395_PIWIL2	piwi like RNA-mediated gene silencing 2
gene2396_SLC39A14	solute carrier family 39 member 14
gene2399_PDLIM2	PDZ and LIM domain 2
gene2400_CUNH8orf58	chromosome unknown C8orf58 homolog
gene2410_LOXL2	lysyl oxidase like 2
gene2416_ADAM28	ADAM metallopeptidase domain 28
gene2431_SOD3	superoxide dismutase 3
gene2437_KCNIP4	potassium voltage-gated channel interacting protein 4
gene2442_AFAP1L1	actin filament associated protein 1 like 1
gene2443_GRPEL2	GrpE like 2
gene2445_IL17B	interleukin 17B
gene2450_PPARGC1B	PPARG coactivator 1 beta
gene2474_LOC110072299	rho GTPase-activating protein 7-like
gene2479_NGF	nerve growth factor
gene2485_LOC110072318	bile acid receptor-like
gene2495_OLFML3	olfactomedin like 3
gene2501_PTPN22	protein tyrosine phosphatase
gene2510_RHOC	ras homolog family member C
gene2516_KCND3	potassium voltage-gated channel subfamily D member 3
gene2518_FAM212B	family with sequence similarity 212 member B
gene2522_WDR77	WD repeat domain 77
gene2531_HSD11B1	hydroxysteroid 11-beta dehydrogenase 1
gene2542_CPS1	carbamoyl-phosphate synthase 1
gene2545_ACADL	acyl-CoA dehydrogenase
gene2549_MAP2	microtubule associated protein 2
gene2560_METTL21A	methyltransferase like 21A
gene2563_FASTKD2	FAST kinase domains 2
gene2564_MDH1B	malate dehydrogenase 1B
gene2566_ADAM23	ADAM metallopeptidase domain 23
gene2602_LOC110072446	nuclear receptor ROR-beta-like
gene2614_MAP2K2	mitogen-activated protein kinase kinase 2
gene2627_CERS4	ceramide synthase 4
gene2628_FBN3	fibrillin 3
gene2638_RFX2	regulatory factor X2
gene2639_ACSBG2	acyl-CoA synthetase bubblegum family member 2
gene2640_MLLT1	MLLT1
gene2641_DUS3L	dihydrouridine synthase 3 like
gene2644_LOC110072461	radial spoke head protein 3 homolog B-like
gene2645_ATCAY	ATCAY
gene2647_KANK3	KN motif and ankyrin repeat domains 3
gene2650_CD320	CD320 molecule
gene2651_LOC110072489	potassium voltage-gated channel subfamily V member 2-like
gene2653_LOC110072654	uncharacterized LOC110072654
gene2657_LOC110072495	C-C motif chemokine 5-like
gene2661_USHBP1	USH1 protein network component harmonin binding protein 1
gene2671_MAP1S	microtubule associated protein 1S
gene2684_CUNH19orf24	chromosome unknown C19orf24 homolog
gene2686_LOC110072612	calcium/calmodulin-dependent protein kinase type IV-like
gene269_CCDC126	coiled-coil domain containing 126
gene2695_APC2	APC2
gene2696_TJP3	tight junction protein 3
gene2707_TMEM59L	transmembrane protein 59 like
gene2708_KLHL26	kelch like family member 26
gene2709_CRTC1	CREB regulated transcription coactivator 1
gene2712_GDF1	growth differentiation factor 1
gene2714_CERS1	ceramide synthase 1
gene2733_KLF2	Kruppel like factor 2
gene2736_CUNH19orf44	chromosome unknown C19orf44 homolog
gene2739_MED26	mediator complex subunit 26
gene2745_CPAMD8	C3 and PZP like
gene2746_IFI30	IFI30
gene2749_IL12RB1	interleukin 12 receptor subunit beta 1
gene2757_LOC110072571	excitatory amino acid transporter 1-like
gene2768_RAB3A	RAB3A
gene2779_ELL	elongation factor for RNA polymerase II
gene2782_ANO8	anoctamin 8
gene2792_PLPPR3	phospholipid phosphatase related 3
gene2793_CFD	complement factor D
gene280_CDCA7L	cell division cycle associated 7 like
gene2806_LOC110072608	arylacetamide deacetylase-like 4
gene2808_LRRC38	leucine rich repeat containing 38
gene2819_PINK1	PTEN induced putative kinase 1
gene2827_CAMK2N1	calcium/calmodulin dependent protein kinase II inhibitor 1
gene2830_LOC110072694	uncharacterized LOC110072694
gene2878_LOC110072738	cadherin-12
gene2879_DCLK2	doublecortin like kinase 2
gene2906_NPY2R	neuropeptide Y receptor Y2
gene2908_GUCY1A3	guanylate cyclase 1 soluble subunit alpha
gene2911_GUCY1B3	guanylate cyclase 1 soluble subunit beta
gene2916_GLRB	glycine receptor beta
gene2919_FAM198B	family with sequence similarity 198 member B
gene2920_TMEM144	transmembrane protein 144
gene2921_RXFP1	relaxin/insulin like family peptide receptor 1
gene2933_PRSS12	protease
gene2935_SEC24D	SEC24 homolog D
gene2946_PRDM5	PR/SET domain 5
gene2948_TNIP3	TNFAIP3 interacting protein 3
gene2952_EXOSC9	exosome component 9
gene2954_BBS7	Bardet-Biedl syndrome 7
gene2977_SLC25A31	solute carrier family 25 member 31
gene2978_HSPA4L	heat shock protein family A (Hsp70) member 4 like
gene2981_ABHD18	abhydrolase domain containing 18
gene2991_ID4	inhibitor of DNA binding 4
gene3006_GPLD1	glycosylphosphatidylinositol specific phospholipase D1
gene3019_LOC110072889	biogenesis of lysosome-related organelles complex 1 subunit 4-like
gene302_SOSTDC1	sclerostin domain containing 1
gene3034_SALL3	spalt like transcription factor 3
gene304_MEOX2	mesenchyme homeobox 2
gene3044_LOC110072935	5-formyltetrahydrofolate cyclo-ligase-like
gene3045_KIAA1024	KIAA1024 ortholog
gene305_AGMO	alkylglycerol monooxygenase
gene3052_RHCG	Rh family C glycoprotein
gene3056_FANCI	Fanconi anemia complementation group I
gene3058_ABHD2	abhydrolase domain containing 2
gene3059_MFGE8	milk fat globule-EGF factor 8 protein
gene3061_ACAN	aggrecan
gene3062_LOC110072933	apoptosis-enhancing nuclease-like
gene3073_PCSK6	proprotein convertase subtilisin/kexin type 6
gene3075_SELENOS	selenoprotein S
gene3077_LRRK1	leucine rich repeat kinase 1
gene3078_ALDH1A3	aldehyde dehydrogenase 1 family member A3
gene3089_PGPEP1L	pyroglutamyl-peptidase I-like
gene3094_NR2F2	nuclear receptor subfamily 2 group F member 2
gene3097_MCTP2	multiple C2 and transmembrane domain containing 2
gene3108_DST	dystonin
gene3118_LGSN	lengsin
gene3143_TM4SF18	transmembrane 4 L six family member 18
gene3146_TM4SF4	transmembrane 4 L six family member 4
gene3155_SELENOT	selenoprotein T
gene3157_SIAH2	siah E3 ubiquitin protein ligase 2
gene3175_MME	membrane metalloendopeptidase
gene3181_GMPS	guanine monophosphate synthase
gene3185_TIPARP	TCDD inducible poly(ADP-ribose) polymerase
gene3189_ATP13A2	ATPase 13A2
gene320_ICA1	islet cell autoantigen 1
gene3200_EPHA2	EPH receptor A2
gene3220_ALPL	alkaline phosphatase
gene3224_HSPG2	heparan sulfate proteoglycan 2
gene323_RPA3	replication protein A3
gene3237_IGSF21	immunoglobin superfamily member 21
gene3244_EMC1	ER membrane protein complex subunit 1
gene3252_NBL1	neuroblastoma 1
gene326_C1GALT1	core 1 synthase
gene3271_LOC110073114	uncharacterized LOC110073114
gene3278_MTOR	mechanistic target of rapamycin
gene3286_MASP2	mannan binding lectin serine peptidase 2
gene3288_CASZ1	castor zinc finger 1
gene3290_PEX14	peroxisomal biogenesis factor 14
gene3295_KIF1B	kinesin family member 1B
gene3297_RBP7	retinol binding protein 7
gene3300_CTNNBIP1	catenin beta interacting protein 1
gene3303_LOC110073119	forkhead box protein D4-like
gene3312_LOC110073095	solute carrier family 2
gene3331_TTLL10	tubulin tyrosine ligase like 10
gene3345_LOC110073143	taste receptor type 1 member 3-like
gene3348_MXRA8	matrix remodeling associated 8
gene3350_LOC110073295	C-factor-like
gene3354_TMEM88B	transmembrane protein 88B
[truncated: 1,037 more rows]

## Sheet: ZWC2
Gene_ID	Gene_Name
gene10006_RAB20	RAB20
gene1003_LOC110080559	uncharacterized LOC110080559
gene10054_NCOA4	nuclear receptor coactivator 4
gene10078_SRF	serum response factor
gene1008_BYSL	bystin like
gene1009_CCND3	cyclin D3
gene10094_MRPL22	mitochondrial ribosomal protein L22
gene10099_LARP1	La ribonucleoprotein domain family member 1
gene10100_HAND1	heart and neural crest derivatives expressed 1
gene10105_MFAP3	microfibrillar associated protein 3
gene10113_ERGIC2	ERGIC and golgi 2
gene10125_GTSE1	G2 and S-phase expressed 1
gene10131_TBC1D22A	TBC1 domain family member 22A
gene10132_EPSTI1	epithelial stromal interaction 1
gene10141_GTF2F2	general transcription factor IIF subunit 2
gene10150_CTBP1	C-terminal binding protein 1
gene10152_UVSSA	UV stimulated scaffold protein A
gene10155_ARL5A	ADP ribosylation factor like GTPase 5A
gene10167_RIOK1	RIO kinase 1
gene10179_TFAP2A	transcription factor AP-2 alpha
gene10194_NDUFS6	NADH:ubiquinone oxidoreductase subunit S6
gene1020_FMOD	fibromodulin
gene10203_TMEFF1	transmembrane protein with EGF like and two follistatin like domains 1
gene1021_PRELP	proline and arginine rich end leucine rich repeat protein
gene10218_SNRNP48	small nuclear ribonucleoprotein U11/U12 subunit 48
gene10246_POT1	protection of telomeres 1
gene10251_LHFPL3	lipoma HMGIC fusion partner-like 3
gene10261_NAMPT	nicotinamide phosphoribosyltransferase
gene10262_CCDC71L	coiled-coil domain containing 71 like
gene10276_TUT1	terminal uridylyl transferase 1
gene1028_REN	renin
gene10284_LOC110081057	phospholipase D3-like
gene10289_HNRNPUL2	heterogeneous nuclear ribonucleoprotein U like 2
gene103_TIAM2	T-cell lymphoma invasion and metastasis 2
gene10305_PCP4L1	Purkinje cell protein 4 like 1
gene10311_LOC110081015	apolipoprotein A-II-like
gene10314_PPOX	protoporphyrinogen oxidase
gene1032_PPP1R15B	protein phosphatase 1 regulatory subunit 15B
gene10322_KLC2	kinesin light chain 2
gene10324_LOC110081005	cytochrome b-c1 complex subunit 8
gene10365_PBXIP1	PBX homeobox interacting protein 1
gene10376_FAM210B	family with sequence similarity 210 member B
gene10379_CASS4	Cas scaffolding protein family member 4
gene10380_RTFDC1	replication termination factor 2 domain containing 1
gene10382_TFAP2C	transcription factor AP-2 gamma
gene10388_RBM38	RNA binding motif protein 38
gene104_SCAF8	SR-related CTD associated factor 8
gene10411_CDC42SE2	CDC42 small effector 2
gene10430_IMP4	IMP4 homolog
gene10431_CCDC115	coiled-coil domain containing 115
gene10438_NDUFB11	NADH:ubiquinone oxidoreductase subunit B11
gene1044_TMCC2	transmembrane and coiled-coil domain family 2
gene10445_USP11	ubiquitin specific peptidase 11
gene10446_LOC110081149	ER membrane protein complex subunit 3-like
gene10452_LOC110081129	proline-rich protein 36-like
gene10486_SLC38A5	solute carrier family 38 member 5
gene10491_FTSJ1	FtsJ RNA methyltransferase homolog 1 (E. coli)
gene10493_WDR45	WD repeat domain 45
gene10501_PIM2	Pim-2 proto-oncogene
gene10502_PHYH	phytanoyl-CoA 2-hydroxylase
gene1052_ELK4	ELK4
gene10521_ITPR2	inositol 1
gene10528_STK38L	serine/threonine kinase 38 like
gene10535_DMTF1	cyclin D binding myb like transcription factor 1
gene10543_LOC110081254	glutathione S-transferase-like
gene10550_COQ9	coenzyme Q9
gene10552_CIAPIN1	cytokine induced apoptosis inhibitor 1
gene1056_RAB29	RAB29
gene10561_MLKL	mixed lineage kinase domain like pseudokinase
gene10571_CHST8	carbohydrate sulfotransferase 8
gene10575_LSM14A	LSM14A
gene10579_KIAA0355	KIAA0355 ortholog
gene10580_LOC110081313	SS18-like protein 2
gene1059_SLC26A9	solute carrier family 26 member 9
gene10593_GINS3	GINS complex subunit 3
gene10595_SETD6	SET domain containing 6
gene10605_FUK	fucokinase
gene1063_FAM72A	family with sequence similarity 72 member A
gene10639_PSMD11	proteasome 26S subunit
gene10654_ITGA2B	integrin subunit alpha 2b
gene10656_GRN	granulin precursor
gene10658_EFTUD2	elongation factor Tu GTP binding domain containing 2
gene10659_CCDC103	coiled-coil domain containing 103
gene10665_NMT1	N-myristoyltransferase 1
gene10667_ACBD4	acyl-CoA binding domain containing 4
gene10668_LOC110081385	protein HEXIM1-like
gene10669_CDK5R1	cyclin dependent kinase 5 regulatory subunit 1
gene10673_MCM2	minichromosome maintenance complex component 2
gene10675_ABTB1	ankyrin repeat and BTB domain containing 1
gene10682_RAB7A	RAB7A
gene10686_COPG1	coatomer protein complex subunit gamma 1
gene107_IPCEF1	interaction protein for cytohesin exchange factors 1
gene1070_ALKBH3	alkB homolog 3
gene10708_LOC110081425	uncharacterized LOC110081425
gene10710_LRRC71	leucine rich repeat containing 71
gene10714_CASQ1	calsequestrin 1
gene10718_LOC110081426	uncharacterized LOC110081426
gene10727_HFE2	hemochromatosis type 2 (juvenile)
gene10734_SF3B4	splicing factor 3b subunit 4
gene10738_PLEKHO1	pleckstrin homology domain containing O1
gene10745_CA14	carbonic anhydrase 14
gene10748_MRPS21	mitochondrial ribosomal protein S21
gene10758_ZNF687	zinc finger protein 687
gene10763_TMOD4	tropomodulin 4
gene10769_GABPB2	GA binding protein transcription factor beta subunit 2
gene10770_CDC42SE1	CDC42 small effector 1
gene10775_MINDY1	MINDY lysine 48 deubiquitinase 1
gene10784_GOLPH3L	golgi phosphoprotein 3 like
gene10787_MCL1	MCL1
gene10805_LOC110081495	semaphorin-7A-like
gene10808_C2CD4D	C2 calcium dependent domain containing 4D
gene10816_GCG	glucagon
gene10817_DPP4	dipeptidyl peptidase 4
gene10827_MARCH7	membrane associated ring-CH-type finger 7
gene10831_GLI3	GLI family zinc finger 3
gene10834_PSMA2	proteasome subunit alpha 2
gene10835_MRPL32	mitochondrial ribosomal protein L32
gene10840_FIGNL1	fidgetin like 1
gene10841_BLVRA	biliverdin reductase A
gene1085_CHST1	carbohydrate sulfotransferase 1
gene10851_ACTR5	ARP5 actin-related protein 5 homolog
gene10855_PTPRT	protein tyrosine phosphatase
gene10859_ISY1	ISY1 splicing factor homolog
gene10861_RAB43	RAB43
gene10862_LOC110081619	platelet glycoprotein IX-like
gene10863_LOC110081625	platelet glycoprotein IX-like
gene10869_NUP210	nucleoporin 210
gene10875_BARX1	BARX homeobox 1
gene10892_TADA1	transcriptional adaptor 1
gene10893_PRDX6	peroxiredoxin 6
gene10894_ANKRD45	ankyrin repeat domain 45
gene10897_DARS2	aspartyl-tRNA synthetase 2
gene10900_ZBTB37	zinc finger and BTB domain containing 37
gene10916_RNF144B	ring finger protein 144B
gene10918_KDM1B	lysine demethylase 1B
gene10931_MYLIP	myosin regulatory light chain interacting protein
gene10937_ANXA1	annexin A1
gene10941_ZFAND5	zinc finger AN1-type containing 5
gene10949_LOC110081703	MAM domain-containing protein 2-like
gene10958_UNC5C	unc-5 netrin receptor C
gene1096_MDK	midkine (neurite growth-promoting factor 2)
gene10964_GTF2F1	general transcription factor IIF subunit 1
gene10966_LOC110081750	afadin- and alpha-actinin-binding protein-like
gene10967_CLPP	caseinolytic mitochondrial matrix peptidase proteolytic subunit
gene10969_MISP3	MISP family member 3
gene10978_NANOS3	nanos C2HC-type zinc finger 3
gene10992_SPC24	SPC24
gene10994_PDE4A	phosphodiesterase 4A
gene10998_TYK2	tyrosine kinase 2
gene10999_RAVER1	ribonucleoprotein
gene11007_LOC110081828	uncharacterized LOC110081828
gene11012_SPN	sialophorin
gene11014_ZG16	zymogen granule protein 16
gene11016_INO80E	INO80 complex subunit E
gene11022_KIF22	kinesin family member 22
gene11025_TMEM219	transmembrane protein 219
gene11029_PRRT2	proline rich transmembrane protein 2
gene11030_MAZ	MYC associated zinc finger protein
gene11036_ALDOA	aldolase
gene11043_BOLA2B	bolA family member 2B
gene11046_LOC110081779	zinc finger and SCAN domain-containing protein 12-like
gene11053_LOC110081860	histone H4
gene11054_LOC110081861	histone H4
gene11061_LOC110081847	zinc finger protein 524-like
gene11062_ZNF865	zinc finger protein 865
gene11067_EPN1	epsin 1
gene11071_LOC110081836	mpv17-like protein
gene11075_SPHK2	sphingosine kinase 2
gene1109_LOC110081984	protein kinase C and casein kinase substrate in neurons protein 3-like
gene11091_UBE2S	ubiquitin conjugating enzyme E2 S
gene11097_TFPT	TCF3 fusion partner
gene11098_PRPF31	pre-mRNA processing factor 31
gene11112_LRRFIP1	LRR binding FLII interacting protein 1
gene11136_GNB4	G protein subunit beta 4
gene11138_ACTL6A	actin like 6A
gene1115_MYBPC3	myosin binding protein C
gene11150_LRRC74B	leucine rich repeat containing 74B
gene11159_LOC110081979	cytochrome c oxidase subunit 6A1
gene11161_SRSF9	serine and arginine rich splicing factor 9
gene11162_DYNLL1	dynein light chain LC8-type 1
gene11164_RNF10	ring finger protein 10
gene11173_CUNH12orf43	chromosome unknown C12orf43 homolog
gene11177_PATZ1	POZ/BTB and AT hook containing zinc finger 1
gene11179_EIF4ENIF1	eukaryotic translation initiation factor 4E nuclear import factor 1
gene11181_PISD	phosphatidylserine decarboxylase
gene1119_PSMC3	proteasome 26S subunit
gene11193_SPECC1L	sperm antigen with calponin homology and coiled-coil domains 1 like
gene11197_SNRPD3	small nuclear ribonucleoprotein D3 polypeptide
gene1120_RAPSN	receptor associated protein of the synapse
gene11200_GGT5	gamma-glutamyltransferase 5
gene11201_SMPD4	sphingomyelin phosphodiesterase 4
gene11221_LOC110082016	protocadherin gamma-B4-like
gene11225_HDAC3	histone deacetylase 3
gene11228_FCHSD1	FCH and double SH3 domains 1
gene1124_NDUFS3	NADH:ubiquinone oxidoreductase core subunit S3
gene11240_RGS9BP	regulator of G-protein signaling 9 binding protein
gene11257_SLC4A1	solute carrier family 4 member 1 (Diego blood group)
gene11258_RUNDC3A	RUN domain containing 3A
gene11259_SLC25A39	solute carrier family 25 member 39
gene11262_CDC27	cell division cycle 27
gene11263_LOC110082051	myosin light chain 4
gene11266_STAC2	SH3 and cysteine rich domain 2
gene11275_TCAP	titin-cap
gene11295_PFDN1	prefoldin subunit 1
gene11299_SRA1	steroid receptor RNA activator 1
gene113_FBXO5	F-box protein 5
gene1130_GPHN	gephyrin
gene11301_SLC35A4	solute carrier family 35 member A4
gene11302_LOC110082121	uncharacterized LOC110082121
gene11303_LOC110082123	toll-like receptor 2
gene11304_TMCO6	transmembrane and coiled-coil domains 6
gene11305_NDUFA2	NADH:ubiquinone oxidoreductase subunit A2
gene11306_IK	IK cytokine
gene11328_LOC110082089	protocadherin gamma-A4-like
gene1133_ATP6V1D	ATPase H+ transporting V1 subunit D
gene11341_PRICKLE1	prickle planar cell polarity protein 1
gene11342_PPHLN1	periphilin 1
gene1135_PLEK2	pleckstrin 2
gene11352_PNPLA8	patatin like phospholipase domain containing 8
gene1136_LOC110082367	galectin-related protein A-like
gene11363_CNOT10	CCR4-NOT transcription complex subunit 10
gene1137_ZFYVE26	zinc finger FYVE-type containing 26
gene11375_FAM198A	family with sequence similarity 198 member A
gene11378_GGCT	gamma-glutamylcyclotransferase
gene11379_LOC110082166	nucleotide-binding oligomerization domain-containing protein 1-like
gene11387_LOC110082211	parvalbumin beta-like
gene11389_LOC110082201	calpain-15-like
gene11390_CCZ1	CCZ1 homolog
gene1141_ARG2	arginase 2
gene11421_LYRM1	LYR motif containing 1
gene11426_LOC110082218	acyl-coenzyme A synthetase ACSM3
gene11438_SLC1A7	solute carrier family 1 member 7
gene1144_PLEKHH1	pleckstrin homology
gene11440_CUNH1orf123	chromosome unknown C1orf123 homolog
gene11441_MAGOH	mago homolog
gene11456_LOC110082265	NADH-cytochrome b5 reductase-like
gene11458_SSBP3	single stranded DNA binding protein 3
gene11465_PARS2	prolyl-tRNA synthetase 2
gene11473_PCSK9	proprotein convertase subtilisin/kexin type 9
gene11476_MECR	mitochondrial trans-2-enoyl-CoA reductase
gene11482_EPB41	erythrocyte membrane protein band 4.1
gene11497_GPS2	G protein pathway suppressor 2
gene1150_GJD4	gap junction protein delta 4
gene11512_TMEM256	transmembrane protein 256
gene1152_CREM	cAMP responsive element modulator
gene1153_CUL2	cullin 2
gene11535_TFR2	transferrin receptor 2
gene11564_SPAG7	sperm associated antigen 7
gene11565_ENO3	enolase 3
gene11570_GP1BA	glycoprotein Ib platelet alpha subunit
gene11579_MED11	mediator complex subunit 11
gene11587_LOC110082405	protein Wnt-5a-like
gene11601_ARF4	ADP ribosylation factor 4
gene11608_VPS13D	vacuolar protein sorting 13 homolog D
gene11621_TNFRSF9	TNF receptor superfamily member 9
gene11638_HES2	hes family bHLH transcription factor 2
gene11657_RBL2	RB transcriptional corepressor like 2
gene11659_TOX3	TOX high mobility group box family member 3
gene11665_GRHL3	grainyhead like transcription factor 3
gene11671_PNRC2	proline rich nuclear receptor coactivator 2
gene11679_ELOA	elongin A
gene11680_LOC110082491	kelch-like protein 31
gene11684_CAP1	adenylate cyclase associated protein 1
gene11686_COL9A2	collagen type IX alpha 2 chain
gene11702_LOC110082605	cathelicidin-2-like
gene1172_BAMBI	BMP and activin membrane bound inhibitor
gene11731_LOC110082577	zinc finger protein 777-like
gene11736_LOC110082575	uncharacterized LOC110082575
gene11737_LOC110082574	uncharacterized LOC110082574
gene11743_LRRC61	leucine rich repeat containing 61
gene11747_LOC110082568	uncharacterized LOC110082568
gene11749_LOC110082592	succinate--CoA ligase [ADP-forming] subunit beta
gene11752_LOC110082593	zinc finger protein OZF-like
gene11782_LOC110082618	collagen alpha-1(XXV) chain-like
gene11783_LOC110082619	collagen alpha-1(XXV) chain-like
gene11797_PKN1	protein kinase N1
gene11812_MAP2K7	mitogen-activated protein kinase kinase 7
gene11819_NACC1	nucleus accumbens associated 1
gene11823_WDR83	WD repeat domain 83
gene11827_LOC110082678	RING finger protein 11-like
gene11830_LOC110082647	peroxiredoxin-1-like
gene11834_MYBPC1	myosin binding protein C
gene11838_TBXAS1	thromboxane A synthase 1
gene11839_HIPK2	homeodomain interacting protein kinase 2
gene11850_SLC37A3	solute carrier family 37 member 3
gene11858_BRAF	B-Raf proto-oncogene
gene11864_SEMA3A	semaphorin 3A
gene11868_PPM1B	protein phosphatase
gene1187_PDSS1	decaprenyl diphosphate synthase subunit 1
gene11874_SIX2	SIX homeobox 2
gene11876_LOC110082730	protein kinase C epsilon type-like
gene11882_LOC110082731	myotubularin-related protein 9-like
gene11884_TMEM234	transmembrane protein 234
gene11893_ZBTB8B	zinc finger and BTB domain containing 8B
gene11898_KIAA1522	KIAA1522 ortholog
gene119_ARMT1	acidic residue methyltransferase 1
gene11901_FNDC5	fibronectin type III domain containing 5
gene11905_AK2	adenylate kinase 2
gene11907_NDUFS5	NADH:ubiquinone oxidoreductase subunit S5
gene11910_LOC110082739	peptidyl-prolyl cis-trans isomerase E
gene11914_TRIT1	tRNA isopentenyltransferase 1
gene11916_THRAP3	thyroid hormone receptor associated protein 3
gene11923_CSF3R	colony stimulating factor 3 receptor
gene11926_LOC110082782	uncharacterized LOC110082782
gene1193_GPR158	G protein-coupled receptor 158
gene11935_MTF1	metal regulatory transcription factor 1
gene11936_INPP5B	inositol polyphosphate-5-phosphatase B
gene11942_MYCBP	MYC binding protein
gene1195_ENKUR	enkurin
gene11957_FAM214B	family with sequence similarity 214 member B
gene11982_CA9	carbonic anhydrase 9
gene11983_ARHGEF39	Rho guanine nucleotide exchange factor 39
gene11985_SYNE2	spectrin repeat containing nuclear envelope protein 2
gene11994_BTBD6	BTB domain containing 6
gene12002_LOC110082886	2'-5'-oligoadenylate synthase 3-like
gene12011_LOC110082892	trichohyalin-like
gene12013_CUNH5orf52	chromosome unknown C5orf52 homolog
gene12029_EMID1	EMI domain containing 1
gene12037_THOC5	THO complex 5
gene12047_MTMR3	myotubularin related protein 3
gene12051_LRRC4C	leucine rich repeat containing 4C
gene12062_MRPL41	mitochondrial ribosomal protein L41
gene12068_TOR4A	torsin family 4 member A
gene12071_GOLGA1	golgin A1
gene12072_ARPC5L	actin related protein 2/3 complex subunit 5 like
gene12073_PPP6C	protein phosphatase 6 catalytic subunit
gene12081_MVB12B	multivesicular body subunit 12B
gene12085_ZBTB34	zinc finger and BTB domain containing 34
gene12089_LOC110082930	uncharacterized LOC110082930
gene1210_MLLT10	myeloid/lymphoid or mixed-lineage leukemia
gene12105_HMGB3	high mobility group box 3
gene12109_MAMLD1	mastermind like domain containing 1
gene1211_LOC110082640	uncharacterized LOC110082640
gene12111_LOC110082988	protein CXorf40A-like
gene1212_SKIDA1	SKI/DACH domain containing 1
gene12125_ETFRF1	electron transfer flavoprotein regulatory factor 1
gene12131_CELF2	CUGBP Elav-like family member 2
gene12144_MYBL2	MYB proto-oncogene like 2
gene12147_SGK2	SGK2
gene12156_MYL9	myosin light chain 9
gene12158_CUNH20orf24	chromosome unknown C20orf24 homolog
gene12162_TP53INP2	tumor protein p53 inducible nuclear protein 2
gene12163_DAPL1	death associated protein like 1
gene12164_PKP4	plakophilin 4
gene12189_CUNH1orf131	chromosome unknown C1orf131 homolog
gene12192_PHF10	PHD finger protein 10
gene12197_PSMB1	proteasome subunit beta 1
gene12198_TBP	TATA-box binding protein
gene12202_SMOC2	SPARC related modular calcium binding 2
gene12204_PLPPR4	phospholipid phosphatase related 4
gene12205_PLPPR5	phospholipid phosphatase related 5
gene12208_DPYD	dihydropyrimidine dehydrogenase
gene12214_FLRT3	fibronectin leucine rich transmembrane protein 3
gene1224_UFSP2	UFM1 specific peptidase 2
gene12245_SOBP	sine oculis binding protein homolog
gene12254_FOXO3	forkhead box O3
gene12257_SESN1	sestrin 1
gene12262_ZBTB24	zinc finger and BTB domain containing 24
gene12271_NRG1	neuregulin 1
gene12306_PSD3	pleckstrin and Sec7 domain containing 3
gene12308_LOC110083187	tripartite motif-containing protein 2-like
gene12311_ABCA1	ATP binding cassette subfamily A member 1
gene12328_OPN5	opsin 5
gene12342_PLA2G7	phospholipase A2 group VII
gene12359_AK3	adenylate kinase 3
gene1236_IRF2	interferon regulatory factor 2
gene12360_RCL1	RNA terminal phosphate cyclase like 1
gene12361_JAK2	Janus kinase 2
gene12375_PCCA	propionyl-CoA carboxylase alpha subunit
gene12377_TMTC4	transmembrane and tetratricopeptide repeat containing 4
gene12391_MED31	mediator complex subunit 31
gene12411_GTF2I	general transcription factor IIi
gene12412_GTF2IRD1	GTF2I repeat domain containing 1
gene12414_SUCLG2	succinate-CoA ligase GDP-forming beta subunit
gene12416_FAM19A1	family with sequence similarity 19 member A1
gene12418_FAM19A4	family with sequence similarity 19 member A4
gene12424_FRMD4B	FERM domain containing 4B
gene12425_CUNH16orf46	chromosome unknown C16orf46 homolog
gene12428_CDYL2	chromodomain Y like 2
gene12429_DYNLRB2	dynein light chain roadblock-type 2
gene12437_MRPS18C	mitochondrial ribosomal protein S18C
gene12438_HELQ	helicase
gene12439_HPSE	heparanase
gene12446_SCD5	stearoyl-CoA desaturase 5
gene1245_CDKN2AIP	CDKN2A interacting protein
gene12453_LOC110083352	transforming growth factor beta-2-like
gene12461_PLCB3	phospholipase C beta 3
gene12465_DNAJC4	DnaJ heat shock protein family (Hsp40) member C4
gene12468_FERMT3	fermitin family member 3
gene12473_LOC110083376	cytochrome b5
gene12479_ZNF407	zinc finger protein 407
gene12481_ZADH2	zinc binding alcohol dehydrogenase domain containing 2
gene12492_DACH1	dachshund family transcription factor 1
gene12495_BORA	bora
gene12499_KIAA1671	KIAA1671 ortholog
gene12516_MN1	MN1 proto-oncogene
gene12525_GIT2	GIT ArfGAP 2
gene12531_MMAB	methylmalonic aciduria (cobalamin deficiency) cblB type
gene12539_USP30	ubiquitin specific peptidase 30
gene1254_NEIL3	nei like DNA glycosylase 3
gene12555_TRAFD1	TRAF-type zinc finger domain containing 1
gene12559_HSBP1	heat shock factor binding protein 1
gene12605_PSMA6	proteasome subunit alpha 6
gene1263_HPGD	hydroxyprostaglandin dehydrogenase 15-(NAD)
gene12636_MRPL57	mitochondrial ribosomal protein L57
gene12638_MICU2	mitochondrial calcium uptake 2
gene12639_FGF9	fibroblast growth factor 9
gene1264_CEP44	centrosomal protein 44
gene12652_KIF26A	kinesin family member 26A
gene12663_XKRX	XK related
gene12665_ARL13A	ADP ribosylation factor like GTPase 13A
gene12667_PITX2	paired like homeodomain 2
gene12677_FAM184A	family with sequence similarity 184 member A
gene1268_SAP30	Sin3A associated protein 30
gene12682_SLC35F1	solute carrier family 35 member F1
gene12689_VGLL2	vestigial like family member 2
gene12699_TC2N	tandem C2 domains
gene12703_NDUFB1	NADH:ubiquinone oxidoreductase subunit B1
gene12704_CPSF2	cleavage and polyadenylation specific factor 2
gene1271_GALNTL6	polypeptide N-acetylgalactosaminyltransferase-like 6
gene12720_ANK3	ankyrin 3
gene1277_WNK2	WNK lysine deficient protein kinase 2
gene12779_COPS8	COP9 signalosome subunit 8
gene12785_TTYH3	tweety family member 3
gene1280_CARD19	caspase recruitment domain family member 19
gene12800_LOC110083729	cytochrome P450 3A24-like
gene1281_SUSD3	sushi domain containing 3
gene1282_FGD3	FYVE
gene12822_PAQR6	progestin and adipoQ receptor family member 6
gene12847_PSMA3	proteasome subunit alpha 3
gene12850_PELI2	pellino E3 ubiquitin protein ligase family member 2
gene12859_ZCCHC24	zinc finger CCHC-type containing 24
gene12861_ZMIZ1	zinc finger MIZ-type containing 1
gene12871_SYN2	synapsin II
gene12874_TAMM41	TAM41 mitochondrial translocator assembly and maintenance homolog
gene12876_ATG7	autophagy related 7
gene12884_ALDH2	aldehyde dehydrogenase 2 family (mitochondrial)
gene12888_SH2B3	SH2B adaptor protein 3
gene12890_CUX2	cut like homeobox 2
gene12891_MYL2	myosin light chain 2
gene12900_KNTC1	kinetochore associated 1
gene12912_WDR66	WD repeat domain 66
gene12929_ARPC3	actin related protein 2/3 complex subunit 3
gene12930_GPN3	GPN-loop GTPase 3
gene12939_MPHOSPH9	M-phase phosphoprotein 9
gene12945_SNRNP35	small nuclear ribonucleoprotein U11/U12 subunit 35
gene12946_RILPL1	Rab interacting lysosomal protein like 1
gene12948_DDX55	DEAD-box helicase 55
gene12949_EIF2B1	eukaryotic translation initiation factor 2B subunit alpha
gene12958_LOC110083899	calcium/calmodulin-dependent protein kinase type II delta chain
gene12962_CCDC174	coiled-coil domain containing 174
gene12965_NR2C2	nuclear receptor subfamily 2 group C member 2
gene12966_MRPS25	mitochondrial ribosomal protein S25
gene1297_LOC110084970	protein Wnt-5a-like
gene12973_TTC27	tetratricopeptide repeat domain 27
gene12977_CDC42EP3	CDC42 effector protein 3
gene12982_LOC110083939	sulfotransferase 6B1-like
gene12983_LOC110083921	sulfotransferase 6B1-like
gene12984_EIF2AK2	eukaryotic translation initiation factor 2 alpha kinase 2
gene12998_SLC40A1	solute carrier family 40 member 1
gene12999_ASNSD1	asparagine synthetase domain containing 1
gene1300_MYF5	myogenic factor 5
gene1301_MYF6	myogenic factor 6
gene13014_STAT1	signal transducer and activator of transcription 1
gene13021_EIF4E	eukaryotic translation initiation factor 4E
gene13027_LOC110083973	alcohol dehydrogenase 1B-like
gene13028_LOC110083977	alcohol dehydrogenase 1B-like
gene1303_OTOGL	otogelin like
gene13038_CUNH11orf58	chromosome unknown C11orf58 homolog
gene13039_SOX6	SRY-box 6
gene13045_CCP110	centriolar coiled-coil protein 110
gene13061_STX8	syntaxin 8
gene13074_HS3ST3B1	heparan sulfate-glucosamine 3-sulfotransferase 3B1
gene13081_KLHL6	kelch like family member 6
gene13090_ENTPD1	ectonucleoside triphosphate diphosphohydrolase 1
gene13092_DNMBP	dynamin binding protein
gene13099_NKX2-3	NK2 homeobox 3
gene13113_NDUFA5	NADH:ubiquinone oxidoreductase subunit A5
gene13134_SLN	sarcolipin
gene1314_CSRP2	cysteine and glycine rich protein 2
gene13144_HNRNPD	heterogeneous nuclear ribonucleoprotein D
gene1316_OSBPL8	oxysterol binding protein like 8
gene13173_LOC110084137	interferon-induced protein with tetratricopeptide repeats 5-like
gene13186_SYF2	SYF2 pre-mRNA splicing factor
gene13189_LOC110084155	RH-like protein
gene13194_MTFR1L	mitochondrial fission regulator 1 like
gene13195_AUNIP	aurora kinase A and ninein interacting protein
gene13197_STMN1	stathmin 1
gene132_KATNA1	katanin catalytic subunit A1
gene13201_TRIM63	tripartite motif containing 63
gene13210_CDC14B	cell division cycle 14B
gene13213_SLC35D2	solute carrier family 35 member D2
gene13238_ACTR2	ARP2 actin related protein 2 homolog
gene13242_SLC1A4	solute carrier family 1 member 4
gene13243_SERTAD2	SERTA domain containing 2
gene13245_AFTPH	aftiphilin
gene13254_STAC	SH3 and cysteine rich domain
gene13256_TRANK1	tetratricopeptide repeat and ankyrin repeat containing 1
gene13269_LOC110084226	calcium/calmodulin-dependent 3'
gene1331_RAB21	RAB21
gene13319_FLOT2	flotillin 2
gene13340_GOSR1	golgi SNAP receptor complex member 1
gene13351_MYL7	myosin light chain 7
gene13382_RIC8B	RIC8 guanine nucleotide exchange factor B
gene13397_LOC110084377	E3 ubiquitin-protein ligase ARIH1-like
gene13398_LOC110084390	E3 ubiquitin-protein ligase ARIH1-like
gene13409_TBCC	tubulin folding cofactor C
gene13412_EML4	echinoderm microtubule associated protein like 4
gene13437_GCC1	GRIP and coiled-coil domain containing 1
gene13463_SEMA7A	semaphorin 7A (John Milton Hagen blood group)
gene13465_LOC110084444	actin
gene13466_LOC110084468	actin
gene13467_LOC110084467	actin
gene13468_ARID3B	AT-rich interaction domain 3B
gene13469_LOC110084464	synaptotagmin-11-like
gene13479_WDR82	WD repeat domain 82
gene13480_GLYCTK	glycerate kinase
gene13486_BAP1	BRCA1 associated protein 1
gene13491_LOC110084490	protein ABHD14B-like
gene13492_PCBP4	poly(rC) binding protein 4
gene13510_CLDN4	claudin 4
gene13528_MRPS17	mitochondrial ribosomal protein S17
gene13530_PSPH	phosphoserine phosphatase
gene13542_RABGEF1	RAB guanine nucleotide exchange factor 1
gene13550_PEX12	peroxisomal biogenesis factor 12
gene13555_ARHGAP8	Rho GTPase activating protein 8
gene13560_NUP50	nucleoporin 50
gene13561_KIAA0930	KIAA0930 ortholog
gene13562_UPK3A	uroplakin 3A
gene13563_LOC110084552	uroplakin-3b-like
gene13575_GCNT4	glucosaminyl (N-acetyl) transferase 4
gene1358_LOC110085279	SCAN domain-containing protein 3-like
gene13581_POC5	POC5 centriolar protein
gene13583_DDX58	DExD/H-box helicase 58
gene13594_WDR41	WD repeat domain 41
gene13597_CRHBP	corticotropin releasing hormone binding protein
gene13598_S100Z	S100 calcium binding protein Z
gene136_TAB2	TGF-beta activated kinase 1/MAP3K7 binding protein 2
gene1360_ERCC3	ERCC excision repair 3
gene1361_LOC110085301	cytochrome P450 27C1
gene13614_PRKRA	protein activator of interferon induced protein kinase EIF2AK2
gene1362_BIN1	bridging integrator 1
gene13628_LOC110084667	transcription factor HES-7.1-like
gene13629_ZNF384	zinc finger protein 384
gene13631_COPS7A	COP9 signalosome subunit 7A
gene13638_GPR162	G protein-coupled receptor 162
gene13654_RBP5	retinol binding protein 5
gene1366_GYPC	glycophorin C (Gerbich blood group)
gene13666_CNMD	chondromodulin
gene13671_MTRF1	mitochondrial translation release factor 1
gene13674_RGCC	regulator of cell cycle
gene13683_SNX8	sorting nexin 8
gene13684_NUDT1	nudix hydrolase 1
gene13685_MRM2	mitochondrial rRNA methyltransferase 2
gene13696_ZFAND2A	zinc finger AN1-type containing 2A
gene13702_LOC110084698	myosin phosphatase Rho-interacting protein-like
gene13709_NELFCD	negative elongation factor complex member C/D
gene13711_LOC110084725	cathepsin Z-like
gene13712_TUBB1	tubulin beta 1 class VI
gene13713_ATP5E	ATP synthase
gene13718_LOC110084734	60S ribosomal protein L27a-like
gene13726_FAM217B	family with sequence similarity 217 member B
gene13734_FIGN	fidgetin
gene13741_ZDHHC23	zinc finger DHHC-type containing 23
gene13747_LOC110084762	SS18-like protein 2
gene13750_LSAMP	limbic system-associated membrane protein
gene13763_TDG	thymine DNA glycosylase
gene13764_GLT8D2	glycosyltransferase 8 domain containing 2
gene13767_TXNRD1	thioredoxin reductase 1
gene13778_SCRIB	scribbled planar cell polarity protein
gene1378_RALB	RAS like proto-oncogene B
gene13780_NRBP2	nuclear receptor binding protein 2
gene13788_PARP10	poly(ADP-ribose) polymerase family member 10
gene13808_SCX	scleraxis bHLH transcription factor
gene13816_LOC110084842	cytochrome P450 11B
gene13817_LOC110084813	TBC1 domain family member 20-like
gene1382_CLASP1	cytoplasmic linker associated protein 1
gene13831_AGO2	argonaute 2
gene13832_CHRAC1	chromatin accessibility complex 1
gene13842_SACM1L	SAC1 suppressor of actin mutations 1 like (yeast)
gene13844_SNRPD1	small nuclear ribonucleoprotein D1 polypeptide
gene13851_LOC110084891	C-C chemokine receptor type 5-like
gene13852_LOC110084892	C-C chemokine receptor type 5-like
gene13855_BFSP2	beaded filament structural protein 2
gene13856_TMEM108	transmembrane protein 108
gene1386_EAF2	ELL associated factor 2
gene13865_LOC110084864	prostatic acid phosphatase-like
gene13871_GID8	GID complex subunit 8 homolog
gene13874_COL9A3	collagen type IX alpha 3 chain
gene13876_OGFR	opioid growth factor receptor
gene13880_GATA5	GATA binding protein 5
gene13889_CMC4	C-X9-C motif containing 4
gene1389_HSPBAP1	HSPB1 associated protein 1
gene13895_CLIC2	chloride intracellular channel 2
gene13909_RBMX2	RNA binding motif protein
gene13912_ENOX2	ecto-NOX disulfide-thiol exchanger 2
gene13913_PIN4	peptidylprolyl cis/trans isomerase
gene13922_DRP2	dystrophin related protein 2
gene13934_FLRT1	fibronectin leucine rich transmembrane protein 1
gene13936_OTUB1	OTU deubiquitinase
gene13943_CUNH11orf84	chromosome unknown C11orf84 homolog
gene13944_CUNH11orf95	chromosome unknown C11orf95 homolog
gene13953_LOC110084977	atypical chemokine receptor 1-like
gene13963_CASKIN1	CASK interacting protein 1
gene13973_ARHGAP17	Rho GTPase activating protein 17
gene13986_ERN2	endoplasmic reticulum to nucleus signaling 2
gene13992_SCNN1G	sodium channel epithelial 1 gamma subunit
gene14_BVES	blood vessel epicardial substance
gene14000_PDPK1	3-phosphoinositide dependent protein kinase 1
gene14023_LOC110085066	O-acyltransferase like protein-like
gene1403_PRELID2	PRELI domain containing 2
gene14047_LOC110085110	myosin light chain 1
gene14050_ALS2CL	ALS2 C-terminal like
gene14062_OBSCN	obscurin
gene14076_LOC110085131	TATA-binding protein-associated factor 2N-like
gene14082_MDH2	malate dehydrogenase 2
gene14086_YWHAG	tyrosine 3-monooxygenase/tryptophan 5-monooxygenase activation protein gamma
gene14090_RASA4B	RAS p21 protein activator 4B
gene14093_LRWD1	leucine rich repeats and WD repeat domain containing 1
gene14099_MYL10	myosin light chain 10
gene14100_COL26A1	collagen type XXVI alpha 1 chain
gene14102_RAD23B	RAD23 homolog B
gene14108_EVPL	envoplakin
gene14116_TRIM47	tripartite motif containing 47
gene14117_WBP2	WW domain binding protein 2
gene1412_PPP2R2B	protein phosphatase 2 regulatory subunit Bbeta
gene14120_LOC110085176	histone H3.3
gene14124_SAP30BP	SAP30 binding protein
gene14125_RECQL5	RecQ like helicase 5
gene14126_SMIM5	small integral membrane protein 5
gene14133_LOC110085193	melanin-concentrating hormone receptor 1-like
gene14134_CASKIN2	CASK interacting protein 2
gene14137_ADAMTS9	ADAM metallopeptidase with thrombospondin type 1 motif 9
gene14138_PRICKLE2	prickle planar cell polarity protein 2
gene14141_PSMD6	proteasome 26S subunit
gene14143_THOC7	THO complex 7
gene14152_CHRNA1	cholinergic receptor nicotinic alpha 1 subunit
gene14158_OLA1	Obg like ATPase 1
gene14161_KBTBD3	kelch repeat and BTB domain containing 3
gene14175_CCNG2	cyclin G2
gene14179_SOWAHB	sosondowah ankyrin repeat domain family member B
gene14180_LOC110085260	16 kDa beta-galactoside-binding lectin-like
gene14181_SHROOM3	shroom family member 3
gene14198_MOB1B	MOB kinase activator 1B
gene14199_DCK	deoxycytidine kinase
gene1421_MSX2	msh homeobox 2
gene14212_PSRC1	proline and serine rich coiled-coil 1
gene14213_PPIL1	peptidylprolyl isomerase like 1
gene14217_PSMA5	proteasome subunit alpha 5
gene14223_GNAI3	G protein subunit alpha i3
gene14231_FAM84B	family with sequence similarity 84 member B
gene14234_CDK19	cyclin dependent kinase 19
gene14236_GTF3C6	general transcription factor IIIC subunit 6
gene14238_SLC16A10	solute carrier family 16 member 10
gene14243_WISP3	WNT1 inducible signaling pathway protein 3
gene14246_ARHGAP24	Rho GTPase activating protein 24
gene14250_KLHL8	kelch like family member 8
gene1426_CPEB4	cytoplasmic polyadenylation element binding protein 4
gene14265_SLC39A8	solute carrier family 39 member 8
gene14273_LAMTOR3	late endosomal/lysosomal adaptor
gene14277_COMT	catechol-O-methyltransferase
gene14280_TBX1	T-box 1
gene14281_GP1BB	glycoprotein Ib platelet beta subunit
gene14283_LOC110085354	septin-2
gene14286_UFD1	ubiquitin recognition factor in ER associated degradation 1
gene14289_LOC110085356	protein HIRA
gene143_RAB32	RAB32
gene14308_GPBP1	GC-rich promoter binding protein 1
gene1431_NKX2-5	NK2 homeobox 5
gene14319_SKIV2L2	Ski2 like RNA helicase 2
gene14323_CDC20B	cell division cycle 20B
gene14332_LOC110085410	protein kinase C-binding protein NELL1
gene14338_LIPT1	lipoyltransferase 1
gene14339_MITD1	microtubule interacting and trafficking domain containing 1
gene14340_MRPL30	mitochondrial ribosomal protein L30
gene14345_LONRF2	LON peptidase N-terminal domain and ring finger 2
gene14348_LOC110085439	histone H2A
gene14371_DOCK8	dedicator of cytokinesis 8
gene1438_NEURL1B	neuralized E3 ubiquitin protein ligase 1B
gene14385_RAB11A	RAB11A
gene14390_MAP2K1	mitogen-activated protein kinase kinase 1
gene14397_PKD1L2	polycystin 1 like 2
gene14399_GAN	gigaxonin
gene1440_STK10	serine/threonine kinase 10
gene14403_LOC110085484	dipeptidase 2-like
gene14407_DDX28	DEAD-box helicase 28
gene14409_NFATC3	nuclear factor of activated T-cells 3
gene14431_TRMT44	tRNA methyltransferase 44 homolog (S. cerevisiae)
gene14440_MSX1	msh homeobox 1
gene1445_LOC110086179	beta-2 adrenergic receptor-like
gene14461_GAS1	growth arrest specific 1
gene14468_LOC110085573	gasdermin-C2-like
gene14472_THRA	thyroid hormone receptor
gene14482_GJD3	gap junction protein delta 3
gene14499_NELFA	negative elongation factor complex member A
gene14503_MXD4	MAX dimerization protein 4
gene14509_LOC110085598	hydroxyacylglutathione hydrolase
gene14515_SOX8	SRY-box 8
gene14556_CARNS1	carnosine synthase 1
gene14558_PTPRCAP	protein tyrosine phosphatase
gene1456_RAB5A	RAB5A
gene14563_TCIRG1	T-cell immune regulator 1
gene14564_NDUFS8	NADH:ubiquinone oxidoreductase core subunit S8
gene14565_ALDH3B1	aldehyde dehydrogenase 3 family member B1
gene14573_LOC110085664	spectrin beta chain
gene14595_RSPRY1	ring finger and SPRY domain containing 1
gene14603_NUP93	nucleoporin 93
gene14605_LOC110085696	metallothionein-2
gene14627_SH3BGRL2	SH3 domain binding glutamate rich protein like 2
gene1463_UBE2E1	ubiquitin conjugating enzyme E2 E1
gene14632_IRAK1BP1	interleukin 1 receptor associated kinase 1 binding protein 1
gene14647_IKZF1	IKAROS family zinc finger 1
gene14655_MSANTD3	Myb/SANT DNA binding domain containing 3
gene14661_AGPS	alkylglycerone phosphate synthase
gene1467_THRB	thyroid hormone receptor beta
gene14680_MRPS7	mitochondrial ribosomal protein S7
gene14683_SUMO2	small ubiquitin-like modifier 2
gene14685_LOC110085823	armadillo repeat-containing protein 7-like
gene14690_ATP5H	ATP synthase
gene14694_MRPL58	mitochondrial ribosomal protein L58
gene14709_CRHR2	corticotropin releasing hormone receptor 2
gene1471_NGLY1	N-glycanase 1
gene14712_VILL	villin like
gene14722_LOC110085838	xin actin-binding repeat-containing protein 1-like
gene14723_CSRNP1	cysteine and serine rich nuclear protein 1
gene14730_MYH15	myosin heavy chain 15
gene1474_LRRC3B	leucine rich repeat containing 3B
gene14745_ZFAT	zinc finger and AT-hook domain containing
gene1476_NEK10	NIMA related kinase 10
gene14769_GNA13	G protein subunit alpha 13
gene14784_UBE2O	ubiquitin conjugating enzyme E2 O
gene14785_SPHK1	sphingosine kinase 1
gene14786_PRPSAP1	phosphoribosyl pyrophosphate synthetase associated protein 1
gene14789_ITCH	itchy E3 ubiquitin protein ligase
gene14806_HAUS1	HAUS augmin like complex subunit 1
gene1481_CMC1	C-X9-C motif containing 1
gene14812_SLC14A1	solute carrier family 14 member 1 (Kidd blood group)
gene14815_CCDC50	coiled-coil domain containing 50
gene14832_LOC110085962	cGMP-dependent protein kinase 1
gene14837_IPPK	inositol-pentakisphosphate 2-kinase
gene14840_ASPN	asporin
gene14846_IARS	isoleucyl-tRNA synthetase
gene14855_FAM171A1	family with sequence similarity 171 member A1
gene14864_VIM	vimentin
gene14867_HACD1	3-hydroxyacyl-CoA dehydratase 1
gene14868_STAM	signal transducing adaptor molecule
gene1487_TGFBR2	transforming growth factor beta receptor 2
gene1488_GADL1	glutamate decarboxylase like 1
gene14882_DCAF17	DDB1 and CUL4 associated factor 17
gene14883_LOC110086022	cytochrome b reductase 1
gene149_EPM2A	EPM2A
gene1490_DACT2	dishevelled binding antagonist of beta catenin 2
gene14901_SRXN1	sulfiredoxin 1
gene14903_CSNK2A1	casein kinase 2 alpha 1
gene14904_LOC110086035	N(4)-(beta-N-acetylglucosaminyl)-L-asparaginase-like
gene14912_SSTR2	somatostatin receptor 2
gene14915_CUNH17orf80	chromosome unknown C17orf80 homolog
gene14917_CDC42EP4	CDC42 effector protein 4
gene14925_DCUN1D1	defective in cullin neddylation 1 domain containing 1
gene14973_SNAP25	synaptosome associated protein 25
gene14974_MKKS	McKusick-Kaufman syndrome
gene14985_ASTE1	asteroid homolog 1 (Drosophila)
gene14991_LOC110086127	collagen alpha-4(VI) chain-like
gene15_LIN28B	lin-28 homolog B
gene15009_RAB42	RAB42
gene15013_GPN2	GPN-loop GTPase 2
gene15015_SFN	stratifin
gene15036_FTH1	ferritin heavy chain 1
gene15052_WFDC3	WAP four-disulfide core domain 3
gene15055_LOC110086202	eppin-like
gene15057_LOC110086203	eppin-like
gene15059_SPINT4	serine peptidase inhibitor
gene15060_LOC110086221	BPTI/Kunitz domain-containing protein-like
gene15063_UBE2C	ubiquitin conjugating enzyme E2 C
gene15064_TNNC2	troponin C2
gene15066_ACOT8	acyl-CoA thioesterase 8
gene15087_LOC110086219	erythrocyte membrane protein band 4.2-like
gene15088_LOC110086245	protein-glutamine gamma-glutamyltransferase 5-like
gene15089_LOC110086246	protein-glutamine gamma-glutamyltransferase E-like
gene15090_LOC110086223	protein-glutamine gamma-glutamyltransferase E-like
gene15094_COPS6	COP9 signalosome subunit 6
gene15111_IQCD	IQ motif containing D
gene15114_CFAP73	cilia and flagella associated protein 73
gene15119_SUDS3	SDS3 homolog
gene15127_SUB1	SUB1 homolog
gene1513_QKI	QKI
gene15134_AMACR	alpha-methylacyl-CoA racemase
gene15135_C1QTNF3	C1q and TNF related 3
gene15151_GFI1	growth factor independent 1 transcriptional repressor
gene15155_LOC110086302	putative ferric-chelate reductase 1
gene15164_POMK	protein-O-mannose kinase
gene15169_G3BP2	G3BP stress granule assembly factor 2
gene15176_SMYD1	SET and MYND domain containing 1
gene15177_FABP1	fatty acid binding protein 1
gene15193_TRAPPC6B	trafficking protein particle complex 6B
gene15197_FBXO33	F-box protein 33
gene15200_COQ6	coenzyme Q6
gene15201_ENTPD5	ectonucleoside triphosphate diphosphohydrolase 5
gene15204_LIN52	lin-52 DREAM MuvB core complex component
gene15226_LOC110086387	up-regulator of cell proliferation-like
gene15232_LOC110086389	up-regulator of cell proliferation-like
gene15238_LOC110086382	pyrin-like
gene15239_LOC110086381	uncharacterized LOC110086381
gene15242_PYCARD	PYD and CARD domain containing
gene15245_LOC110086427	cytochrome c oxidase subunit 6A2
gene15246_LOC110086421	integrin alpha-X-like
gene15252_KCND2	potassium voltage-gated channel subfamily D member 2
gene15259_LHX5	LIM homeobox 5
gene15261_TBX5	T-box 5
gene15262_TBX3	T-box 3
gene15283_SBK2	SH3 domain binding kinase family member 2
gene15294_LOC110086460	zinc finger and SCAN domain-containing protein 20-like
gene1532_MRPL18	mitochondrial ribosomal protein L18
gene15343_LOC110086533	sperm acrosome membrane-associated protein 6-like
gene15345_KCNN4	potassium calcium-activated channel subfamily N member 4
gene15348_LOC110086525	interferon-inducible GTPase 5-like
gene15349_LOC110086550	vitamin D3 hydroxylase-associated protein-like
gene1535_WTAP	WT1 associated protein
gene15360_LOC110086538	cytochrome P450 4B1-like
gene15361_LOC110086546	cytochrome P450 4B1-like
gene15364_TAL1	TAL bHLH transcription factor 1
gene15377_LOC110086559	complement decay-accelerating factor-like
gene15378_LOC110086557	complement receptor type 1-like
gene15380_LOC110086571	nuclear receptor coactivator 5-like
gene15383_PAPD5	poly(A) RNA polymerase D5
gene15384_ADCY7	adenylate cyclase 7
gene15385_BRD7	bromodomain containing 7
gene15398_CALM1	calmodulin 1
gene15403_EFCAB11	EF-hand calcium binding domain 11
gene15406_HIPK3	homeodomain interacting protein kinase 3
gene15417_LOC110086604	PC-esterase domain-containing protein 1A-like
gene1542_EZR	ezrin
gene15430_EXOSC7	exosome component 7
gene15437_CTNNB1	catenin beta 1
gene15440_LOC110086634	ras-related protein Rab-6A-like
gene15450_TBX22	T-box 22
gene15451_LOC110086647	charged multivesicular body protein 1b-2-like
gene15456_LOC110086649	non-histone chromosomal protein HMG-14A
gene15457_SH3BGRL	SH3 domain binding glutamate rich protein like
gene15461_LOC110086667	inaD-like protein
gene15462_KANK4	KN motif and ankyrin repeat domains 4
gene1547_GTF2H5	general transcription factor IIH subunit 5
gene15470_ITGB3BP	integrin subunit beta 3 binding protein
gene15471_EFCAB7	EF-hand calcium binding domain 7
gene15473_LOC110086670	succinate--hydroxymethylglutarate CoA-transferase-like
gene15481_FRZB	frizzled-related protein
gene15488_IRF1	interferon regulatory factor 1
gene15491_PDLIM4	PDZ and LIM domain 4
gene15496_RAPGEF6	Rap guanine nucleotide exchange factor 6
gene15499_SNX29	sorting nexin 29
gene15504_NUBP2	nucleotide binding protein 2
gene15505_IGFALS	insulin like growth factor binding protein acid labile subunit
gene15506_LOC110086702	WW domain-binding protein 2-like
gene15523_PLAGL2	PLAG1 like zinc finger 2
gene1553_TMEM242	transmembrane protein 242
gene15535_TPX2	TPX2
gene15536_BCL2L1	BCL2 like 1
gene15541_HMMR	hyaluronan mediated motility receptor
gene15583_LOC110086784	hexokinase-1
gene15585_SUPV3L1	Suv3 like RNA helicase
gene15610_WRAP73	WD repeat containing
gene15615_LOC110086815	uncharacterized oxidoreductase YjhC-like
gene15630_SNX22	sorting nexin 22
gene15643_IREB2	iron responsive element binding protein 2
gene15645_PSMA4	proteasome subunit alpha 4
gene15649_UBE2Q2	ubiquitin conjugating enzyme E2 Q2
gene15652_TMEM266	transmembrane protein 266
gene15658_LOC110086869	carbonic anhydrase 13-like
gene15659_CUNH8orf59	chromosome unknown C8orf59 homolog
gene15660_E2F5	E2F transcription factor 5
gene15661_LRRCC1	leucine rich repeat and coiled-coil centrosomal protein 1
gene15664_RBBP8NL	RBBP8 N-terminal like
gene15665_CABLES2	Cdk5 and Abl enzyme substrate 2
gene15674_PSMA7	proteasome subunit alpha 7
gene1568_ZNF654	zinc finger protein 654
gene15691_FAM181B	family with sequence similarity 181 member B
gene15706_CCNF	cyclin F
gene15709_CUNH16orf59	chromosome unknown C16orf59 homolog
gene15714_LOC110086936	tripartite motif-containing protein 7-like
gene15716_LOC110086939	RNA binding protein fox-1 homolog 1-like
gene15722_CLEC11A	C-type lectin domain containing 11A
gene15723_SHANK1	SH3 and multiple ankyrin repeat domains 1
gene15734_BCL2L12	BCL2 like 12
gene15735_RUVBL2	RuvB like AAA ATPase 2
gene15738_UBE2E3	ubiquitin conjugating enzyme E2 E3
gene15742_CERKL	ceramide kinase like
gene15770_TRIM54	tripartite motif containing 54
gene15777_ZNF513	zinc finger protein 513
gene15787_LOC110087015	serine/threonine-protein phosphatase 2A 56 kDa regulatory subunit delta isoform-like
gene15789_GNMT	glycine N-methyltransferase
gene15793_TTL	tubulin tyrosine ligase
gene15796_FBLN7	fibulin 7
gene15808_GABRA6	gamma-aminobutyric acid type A receptor alpha6 subunit
gene15815_ZC3H7A	zinc finger CCCH-type containing 7A
gene15829_SOCS1	suppressor of cytokine signaling 1
gene15830_NDE1	nudE neurodevelopment protein 1
gene15832_FOPNL	FGFR1OP N-terminal like
gene15836_RRP15	ribosomal RNA processing 15 homolog
gene15839_SLC30A10	solute carrier family 30 member 10
gene15843_GSE1	Gse1 coiled-coil protein
gene15849_FOXF1	forkhead box F1
gene15852_PNPT1	polyribonucleotide nucleotidyltransferase 1
gene15853_PPP4R3B	protein phosphatase 4 regulatory subunit 3B
gene15854_CFAP36	cilia and flagella associated protein 36
gene15871_LOC110087096	platelet glycoprotein Ib alpha chain-like
gene15872_APOD	apolipoprotein D
gene15879_LOC110087101	uncharacterized LOC110087101
gene15880_LOC110087108	carboxypeptidase N subunit 2-like
gene15903_ROGDI	rogdi homolog
gene15904_GLYR1	glyoxylate reductase 1 homolog
gene15914_NAGPA	N-acetylglucosamine-1-phosphodiester alpha-N-acetylglucosaminidase
gene15917_TMEM186	transmembrane protein 186
gene15930_LOC110087156	poly(U)-specific endoribonuclease-A-like
gene15937_PSTPIP1	proline-serine-threonine phosphatase interacting protein 1
gene15941_KCNK2	potassium two pore domain channel subfamily K member 2
gene15945_SMYD2	SET and MYND domain containing 2
gene15956_LOC110087185	PRKR-interacting protein 1 homolog
gene15959_PDAP1	PDGFA associated protein 1
gene15971_LOC110087209	cytochrome P450 2W1-like
gene15973_ADAP1	ArfGAP with dual PH domains 1
gene15974_GET4	golgi to ER traffic protein 4
gene15996_BLOC1S2	biogenesis of lysosomal organelles complex 1 subunit 2
gene16003_CHUK	conserved helix-loop-helix ubiquitous kinase
gene16032_LOC110087268	kyphoscoliosis peptidase-like
gene16038_LOC110087259	RING finger protein 225-like
gene16069_TEKT2	tektin 2
gene16076_FHIT	fragile histidine triad
gene16082_NMI	N-myc and STAT interactor
gene16093_CDH2	cadherin 2
gene16095_EIF5	eukaryotic translation initiation factor 5
gene16096_MARK3	microtubule affinity regulating kinase 3
gene16097_CKB	creatine kinase B
gene16098_TRMT61A	tRNA methyltransferase 61A
gene16099_BAG5	BCL2 associated athanogene 5
gene1610_BCL9	B-cell CLL/lymphoma 9
gene16111_DNAJA1	DnaJ heat shock protein family (Hsp40) member A1
gene16112_SMU1	DNA replication regulator and spliceosomal factor
gene16122_RBPMS	RNA binding protein with multiple splicing
gene16123_DCTN6	dynactin subunit 6
gene16127_PLCB1	phospholipase C beta 1
gene16132_SPECC1	sperm antigen with calponin homology and coiled-coil domains 1
gene16138_NCOR1	nuclear receptor corepressor 1
gene16153_TRPV1	transient receptor potential cation channel subfamily V member 1
gene16163_LOC110087420	aldehyde dehydrogenase
gene16184_LOC110087445	kelch-like protein 20
gene16185_LOC110087429	kelch-like protein 20
gene16187_LOC110087446	uncharacterized LOC110087446
gene16204_GRIN1	glutamate ionotropic receptor NMDA type subunit 1
gene16208_CYSRT1	cysteine rich tail 1
gene1621_CADM2	cell adhesion molecule 2
gene16210_NDOR1	NADPH dependent diflavin oxidoreductase 1
gene16211_TMEM203	transmembrane protein 203
gene16216_FAM166A	family with sequence similarity 166 member A
gene16233_MCM3AP	minichromosome maintenance complex component 3 associated protein
gene16235_YBEY	ybeY metallopeptidase (putative)
gene16242_TSPAN9	tetraspanin 9
gene16244_PARP11	poly(ADP-ribose) polymerase family member 11
gene16245_TIGAR	TP53 induced glycolysis regulatory phosphatase
gene1625_FAM110B	family with sequence similarity 110 member B
gene16250_RAD51AP1	RAD51 associated protein 1
gene16253_NDUFA9	NADH:ubiquinone oxidoreductase subunit A9
gene16257_PTTG1	pituitary tumor-transforming 1
gene16264_TTC1	tetratricopeptide repeat domain 1
gene16267_PRDX2	peroxiredoxin 2
gene1627_UBXN2B	UBX domain protein 2B
gene16277_PSME2	proteasome activator subunit 2
gene16279_PSME1	proteasome activator subunit 1
gene16282_DCAF11	DDB1 and CUL4 associated factor 11
gene1629_SDCBP	syndecan binding protein
gene1630_NSMAF	neutral sphingomyelinase activation associated factor
gene16305_MRE11	MRE11 homolog
gene16312_ENDOD1	endonuclease domain containing 1
gene16313_SESN3	sestrin 3
gene16317_MAML2	mastermind like transcriptional coactivator 2
gene16324_EEF1A2	eukaryotic translation elongation factor 1 alpha 2
gene16333_LOC110087598	catenin alpha-3-like
gene16339_SIRT1	sirtuin 1
gene16342_CCDC83	coiled-coil domain containing 83
gene16343_PICALM	phosphatidylinositol binding clathrin assembly protein
gene16344_EED	embryonic ectoderm development
gene16346_HIKESHI	Hikeshi
gene16351_TMEM135	transmembrane protein 135
gene16360_DNAJC19	DnaJ heat shock protein family (Hsp40) member C19
gene16374_LOC110087647	G-protein coupled receptor 4-like
gene16386_LOC110087660	histone H4
gene16388_LOC110087651	histone H2A type 2-C-like
gene16401_LOC110087654	histone H2B 1/2/3/4/6-like
gene16416_LOC110087650	histone H2A type 2-C-like
gene1644_RNF4	ring finger protein 4
gene16441_ADAT3	adenosine deaminase
gene16457_ATP10A	ATPase phospholipid transporting 10A (putative)
gene16465_LOC110087731	cytochrome c oxidase assembly factor 5-like
gene16466_CCDC85A	coiled-coil domain containing 85A
gene16476_LOC110087748	cytochrome b5 domain-containing protein 1
gene165_VTA1	vesicle trafficking 1
gene16504_LOC110087773	FERM and PDZ domain-containing protein 2-like
gene16505_LOC110087774	tyrosine-protein phosphatase non-receptor type 13-like
gene16513_SEPHS1	selenophosphate synthetase 1
gene16516_PRPF18	pre-mRNA processing factor 18
gene16531_MRPL52	mitochondrial ribosomal protein L52
gene16535_RBM23	RNA binding motif protein 23
gene16539_CUNH14orf93	chromosome unknown C14orf93 homolog
gene16544_CEBPE	CCAAT/enhancer binding protein epsilon
gene16555_LOC110087834	myosin-6
gene16556_LOC110087836	myosin-7
gene16559_THTPA	thiamine triphosphatase
gene1657_TRIM55	tripartite motif containing 55
gene16584_KIN	Kin17 DNA and RNA binding protein
gene16592_MEIS2	Meis homeobox 2
gene16595_MED28	mediator complex subunit 28
gene16596_LAP3	leucine aminopeptidase 3
gene16610_LOC110087902	ADP-ribosylation factor-like
gene16612_HOXB13	homeobox B13
gene16613_HOXB9	homeobox B9
gene16627_LOC110087928	autism susceptibility gene 2 protein-like
gene16636_RANBP1	RAN binding protein 1
gene16638_DGCR8	DGCR8
gene16639_TANGO2	transport and golgi organization 2 homolog
gene16643_KCTD3	potassium channel tetramerization domain containing 3
gene16644_LOC110087933	brain-specific angiogenesis inhibitor 1-like
gene16646_LOC110087934	t-SNARE domain-containing protein 1-like
gene16652_ASB3	ankyrin repeat and SOCS box containing 3
gene16653_CHAC2	ChaC cation transport regulator homolog 2
gene16658_NPY1R	neuropeptide Y receptor Y1
gene16682_LOC110087987	glutathione S-transferase Mu 1-like
gene16687_STRIP1	striatin interacting protein 1
gene16692_LAMTOR5	late endosomal/lysosomal adaptor
gene167_NMBR	neuromedin B receptor
gene16701_SMAD3	SMAD family member 3
gene16714_LOC110088005	TRPM8 channel-associated factor homolog
gene16719_LOC110088016	voltage-dependent calcium channel subunit alpha-2/delta-1-like
gene16725_LOC110088049	zinc finger protein OZF-like
gene16754_LOC110088036	zinc finger protein CKR1-like
gene16755_LOC110088053	uncharacterized LOC110088053
gene16756_LOC110088047	zinc finger protein 3 homolog
gene16780_MIEF1	mitochondrial elongation factor 1
gene16781_MGAT3	mannosyl (beta-1
gene16783_TAB1	TGF-beta activated kinase 1 (MAP3K7) binding protein 1
gene16784_SYNGR1	synaptogyrin 1
gene16787_ZFYVE1	zinc finger FYVE-type containing 1
gene16796_DNAL1	dynein axonemal light chain 1
gene16797_ELMSAN1	ELM2 and Myb/SANT domain containing 1
gene16798_PTGR2	prostaglandin reductase 2
gene16804_LOC110088106	A disintegrin and metalloproteinase with thrombospondin motifs 9-like
gene16824_LOC110088130	lens fiber membrane intrinsic protein-like
gene16826_PFDN2	prefoldin subunit 2
gene16827_NIT1	nitrilase 1
gene16831_CTSF	cathepsin F
gene16833_TAF6L	TATA-box binding protein associated factor 6 like
gene16834_TMEM179B	transmembrane protein 179B
gene16847_LOC110088153	netrin-4-like
gene16849_ZXDC	ZXD family zinc finger C
gene16854_PHF6	PHD finger protein 6
gene16856_FAM122B	family with sequence similarity 122B
gene16862_FHL1	four and a half LIM domains 1
gene16866_HTATSF1	HIV-1 Tat specific factor 1
gene16880_NOP58	NOP58 ribonucleoprotein
gene1689_MSC	musculin
gene16896_KDM4C	lysine demethylase 4C
gene16899_UHRF2	ubiquitin like with PHD and ring finger domains 2
gene16903_RIC1	RIC1 homolog
gene16904_PDCD1LG2	programmed cell death 1 ligand 2
gene16909_LOC110088221	diamine acetyltransferase 1-like
gene16912_HDX	highly divergent homeobox
gene1692_TERF1	telomeric repeat binding factor 1
gene16924_LOC110088239	transcription factor HES-5-like
gene16964_LOC110088264	histone H1-like
gene16966_LOC110088287	histone H2A-IV-like
gene16975_LOC110088281	histone H1-like
gene16987_TGM1	transglutaminase 1
gene16989_GMPR2	guanosine monophosphate reductase 2
gene16990_NEDD8	neural precursor cell expressed
gene170_TXLNB	taxilin beta
gene1700_ELOC	elongin C
gene17008_ATPIF1	ATPase inhibitory factor 1
gene1701_HAUS3	HAUS augmin like complex subunit 3
gene17018_CITED4	Cbp/p300 interacting transactivator with Glu/Asp rich carboxy-terminal domain 4
gene17023_SENP5	SUMO1/sentrin specific peptidase 5
gene17043_PAQR4	progestin and adipoQ receptor family member 4
gene17050_ELOB	elongin B
gene17057_LOC110088377	serine protease 27-like
gene17063_LOC110088378	RING finger protein 112-like
gene17075_ZNF185	zinc finger protein 185 with LIM domain
gene17080_SRGAP2	SLIT-ROBO Rho GTPase activating protein 2
gene17082_RASSF5	Ras association domain family member 5
gene17084_DYRK3	dual specificity tyrosine phosphorylation regulated kinase 3
gene17091_TMEM222	transmembrane protein 222
gene17113_NLK	nemo like kinase
gene17120_TECRL	trans-2
gene17123_LOC110088452	zinc finger protein 536-like
gene17126_HAX1	HCLS1 associated protein X-1
gene17131_CUNH1orf43	chromosome unknown C1orf43 homolog
gene17132_UBAP2L	ubiquitin associated protein 2 like
gene17133_JTB	jumping translocation breakpoint
gene17138_S100A6	S100 calcium binding protein A6
gene17141_LOC110088464	protein S100-A2-like
gene17147_S100A1	S100 calcium binding protein A1
gene17151_ILF2	interleukin enhancer binding factor 2
gene17160_LOC110088485	protein S100-A9-like
gene17162_LOC110088453	protein S100-A12-like
gene17164_LOC110088456	protein S100-A12-like
gene17178_RNF219	ring finger protein 219
gene17186_GEMIN7	gem nuclear organelle associated protein 7
gene17200_ATP5SL	ATP5S like
gene17212_TSG101	tumor susceptibility 101
gene17213_LOC110088549	L-lactate dehydrogenase A chain
gene17216_SAAL1	serum amyloid A like 1
gene17221_PAK1	p21 (RAC1) activated kinase 1
gene17225_AAMDC	adipogenesis associated Mth938 domain containing
gene17233_KCTD21	potassium channel tetramerization domain containing 21
gene17235_LOC110088568	GRB2-associated-binding protein 2-like
gene17239_NOX4	NADPH oxidase 4
gene17249_LOC110088598	probable palmitoyltransferase ZDHHC1
gene17255_PSKH1	protein serine kinase H1
gene17258_NUTF2	nuclear transport factor 2
gene17259_THAP11	THAP domain containing 11
gene17267_RGMA	repulsive guidance molecule family member a
gene17272_GRIA3	glutamate ionotropic receptor AMPA type subunit 3
gene17279_GSC	goosecoid homeobox
gene17280_DICER1	dicer 1
gene17288_SKA1	spindle and kinetochore associated complex subunit 1
gene17292_SMAD4	SMAD family member 4
gene17300_AMER2	APC membrane recruitment protein 2
gene17302_HIC2	HIC ZBTB transcriptional repressor 2
gene17304_YDJC	YdjC chitooligosaccharide deacetylase homolog
gene17311_PPIL2	peptidylprolyl isomerase like 2
gene17318_LOC110088665	cAMP-specific 3'
gene1733_NPTX1	neuronal pentraxin 1
gene17336_ZBTB12	zinc finger and BTB domain containing 12
gene1735_RNF213	ring finger protein 213
gene17355_CACNG1	calcium voltage-gated channel auxiliary subunit gamma 1
gene17359_LOC110088731	protein arginine N-methyltransferase 8
gene17376_IGFBP3	insulin like growth factor binding protein 3
gene17390_LRCH3	leucine rich repeats and calponin homology domain containing 3
gene17402_RBFOX1	RNA binding protein
gene17403_HS3ST5	heparan sulfate-glucosamine 3-sulfotransferase 5
gene17404_HDAC2	histone deacetylase 2
gene17426_PLEK	pleckstrin
gene17448_CALN1	calneuron 1
gene1745_LOC110091260	chromobox protein homolog 2-like
gene17460_FOXN3	forkhead box N3
gene17461_TTC8	tetratricopeptide repeat domain 8
gene17467_LOC110088843	frataxin
gene17469_AQP1	aquaporin 1 (Colton blood group)
gene1748_RBFOX3	RNA binding protein
gene17482_PARD6A	par-6 family cell polarity regulator alpha
gene17486_RANBP10	RAN binding protein 10
gene17498_LOC110088881	cytochrome P450 2J2-like
gene17500_CHRNG	cholinergic receptor nicotinic gamma subunit
gene17501_CHRND	cholinergic receptor nicotinic delta subunit
gene17506_BRINP1	BMP/retinoic acid inducible neural specific 1
gene17523_KEL	Kell blood group
gene17528_STON1	stonin 1
gene17536_HYLS1	HYLS1
gene17544_LOC110088927	cytochrome b-c1 complex subunit Rieske
gene17552_LOC110088936	pinopsin-like
gene17555_COPS9	COP9 signalosome subunit 9
gene17558_LOC110088941	contactin-associated protein-like 4
gene17562_RPRD1B	regulation of nuclear pre-mRNA domain containing 1B
gene17569_BICDL1	BICD family like cargo adaptor 1
gene1757_PGS1	phosphatidylglycerophosphate synthase 1
gene17579_CENPC	centromere protein C
gene17583_TWSG1	twisted gastrulation BMP signaling modulator 1
gene1759_LOC110090439	probable low-specificity L-threonine aldolase 2
gene17594_RBM17	RNA binding motif protein 17
gene17600_METTL16	methyltransferase like 16
gene17601_ZNF385C	zinc finger protein 385C
gene17603_DNAJC7	DnaJ heat shock protein family (Hsp40) member C7
gene17605_TTC25	tetratricopeptide repeat domain 25
gene17615_ARL1	ADP ribosylation factor like GTPase 1
gene17629_NDUFB3	NADH:ubiquinone oxidoreductase subunit B3
gene1763_TK1	thymidine kinase 1
gene17632_PPIL3	peptidylprolyl isomerase like 3
gene17638_MAD2L1BP	MAD2L1 binding protein
gene17639_GTPBP2	GTP binding protein 2
gene17640_POLH	DNA polymerase eta
gene17643_POLR1C	RNA polymerase I subunit C
gene17646_TJAP1	tight junction associated protein 1
gene17647_DLK2	delta like non-canonical Notch ligand 2
gene1765_TMC8	transmembrane channel like 8
gene17657_ARHGAP39	Rho GTPase activating protein 39
gene1766_TMC6	transmembrane channel like 6
gene17668_LOC110089056	lymphocyte antigen 6E-like
gene1767_ARL16	ADP ribosylation factor like GTPase 16
gene17672_DCUN1D5	defective in cullin neddylation 1 domain containing 5
gene17678_LOC110089071	matrix metalloproteinase-27-like
gene17688_FAM187B	family with sequence similarity 187 member B
gene17699_PSMC4	proteasome 26S subunit
gene17710_LOC110089130	deoxyribonuclease-1-like
gene17726_SRL	sarcalumenin
gene17727_ADCY9	adenylate cyclase 9
gene17728_LOC110089136	hemoglobin subunit alpha-1-like
gene17729_LOC110089137	uncharacterized LOC110089137
gene17734_MPG	N-methylpurine DNA glycosylase
gene17735_NPRL3	NPR3 like
gene17736_LOC110089112	hemoglobin subunit alpha-D-like
gene17737_LOC110089114	hemoglobin subunit beta-Z-like
gene17738_TMEM8A	transmembrane protein 8A
gene17739_MRPL28	mitochondrial ribosomal protein L28
gene17741_LOC110089119	axin-1-like
gene1775_PPP1R27	protein phosphatase 1 regulatory subunit 27
gene17758_VCPKMT	valosin containing protein lysine methyltransferase
gene17767_CRTAC1	cartilage acidic protein 1
gene1778_ALYREF	Aly/REF export factor
gene17780_ZDHHC16	zinc finger DHHC-type containing 16
gene17809_WSB2	WD repeat and SOCS box containing 2
gene1781_PCYT2	phosphate cytidylyltransferase 2
gene1782_SIRT7	sirtuin 7
gene17831_UBE2G1	ubiquitin conjugating enzyme E2 G1
gene17836_LOC110089236	uroplakin-3b-like
gene17848_SLC51B	solute carrier family 51 beta subunit
gene17854_SPG21	SPG21
gene17860_LOC110089270	MIP18 family protein FAM96A-like
gene17869_RBM24	RNA binding motif protein 24
gene17871_FAM8A1	family with sequence similarity 8 member A1
gene17875_LOC110089284	transmembrane protein 14C-like
gene17878_PHACTR1	phosphatase and actin regulator 1
gene17883_BRD3	bromodomain containing 3
gene17884_VAV2	vav guanine nucleotide exchange factor 2
gene17895_LOC110089307	uncharacterized LOC110089307
gene17899_EAPP	E2F associated phosphoprotein
gene179_HEBP2	heme binding protein 2
gene17904_ABCF1	ATP binding cassette subfamily F member 1
gene17911_RPP21	ribonuclease P/MRP subunit p21
gene17919_LOC110089321	E3 ubiquitin-protein ligase TRIM39-like
gene17935_UHMK1	U2AF homology motif kinase 1
gene17937_TMEM121	transmembrane protein 121
gene17942_NUF2	NUF2
gene17945_SNRNP40	small nuclear ribonucleoprotein U5 subunit 40
gene17963_LOC110089381	corticoliberin-like
gene17965_UCKL1	uridine-cytidine kinase 1 like 1
gene1797_FASN	fatty acid synthase
gene17972_LOC110089391	regulator of telomere elongation helicase 1-like
gene17976_ZGPAT	zinc finger CCCH-type and G-patch domain containing
gene17978_SLC2A4RG	SLC2A4 regulator
gene17990_CCDC136	coiled-coil domain containing 136
gene17994_EXO5	exonuclease 5
gene17995_WSCD1	WSC domain containing 1
gene18002_JMJD8	jumonji domain containing 8
gene18044_BLOC1S3	biogenesis of lysosomal organelles complex 1 subunit 3
gene18045_LOC110089463	galectin-8-like
gene18047_LOC110089469	interferon-induced protein 44-like
gene18053_DOCK5	dedicator of cytokinesis 5
gene18058_GCA	grancalcin
gene18059_IFIH1	interferon induced with helicase C domain 1
gene18061_PIGQ	phosphatidylinositol glycan anchor biosynthesis class Q
gene18064_CAPN15	calpain 15
gene1808_WFIKKN2	WAP
gene18099_GPATCH1	G-patch domain containing 1
gene18107_LOC110089531	uncharacterized LOC110089531
gene18119_CAPN7	calpain 7
gene18122_EAF1	ELL associated factor 1
gene18124_ZNRF2	zinc and ring finger 2
gene18167_CCT5	chaperonin containing TCP1 subunit 5
gene18171_FASTKD3	FAST kinase domains 3
gene18179_PHLDB3	pleckstrin homology like domain family B member 3
gene18185_LOC110089628	interferon-inducible GTPase 5-like
gene18194_LOC110089620	phospholipase A2 inhibitor and Ly6/PLAUR domain-containing protein-like
gene18221_LOC110089644	mitogen-activated protein kinase 11
gene18227_CCDC85C	coiled-coil domain containing 85C
gene18239_FBL	fibrillarin
gene1824_CDK17	cyclin dependent kinase 17
gene18241_DBR1	debranching RNA lariats 1
gene18243_PSMB2	proteasome subunit beta 2
gene18244_TFAP2E	transcription factor AP-2 epsilon
gene1825_ELK3	ELK3
gene18252_PEF1	penta-EF-hand domain containing 1
gene18262_TGS1	trimethylguanosine synthase 1
gene18274_TNKS	tankyrase
gene18286_LOC110089730	reelin-like
gene18300_CNIH1	cornichon family AMPA receptor auxiliary protein 1
gene18301_BMP4	bone morphogenetic protein 4
gene18318_AGPAT1	1-acylglycerol-3-phosphate O-acyltransferase 1
gene18320_PBX2	PBX homeobox 2
gene18328_LOC110089767	zinc finger protein 436-like
gene18331_LOC110089775	zinc finger protein RFP-like
gene18333_PRKAR2B	protein kinase cAMP-dependent type II regulatory subunit beta
gene18339_BCAP29	B-cell receptor associated protein 29
gene18345_ARRDC1	arrestin domain containing 1
gene18346_SETBP1	SET binding protein 1
gene1835_METAP2	methionyl aminopeptidase 2
gene18364_POLR2H	RNA polymerase II subunit H
gene18372_LOC110089833	dimethylaniline monooxygenase [N-oxide-forming] 5-like
gene18373_PRKAB2	protein kinase AMP-activated non-catalytic subunit beta 2
gene18377_MZT2B	mitotic spindle organizing protein 2B
gene1839_FGD6	FYVE
gene18405_GALR2	galanin receptor 2
gene18424_MED18	mediator complex subunit 18
gene18425_SESN2	sestrin 2
gene18433_KIRREL2	kin of IRRE like 2 (Drosophila)
gene18440_PSENEN	presenilin enhancer gamma-secretase subunit
gene18477_LOC110089946	uncharacterized LOC110089946
gene18493_LOC110089967	RNA-binding protein 4B-like
gene18497_LOC110089955	RNA-binding protein 14-like
gene18502_PCNX3	pecanex homolog 3 (Drosophila)
gene18506_MEN1	menin 1
gene18510_LOC110089983	core histone macro-H2A.2
gene18511_AIFM2	apoptosis inducing factor
gene18513_HMBOX1	homeobox containing 1
gene18517_CUL4B	cullin 4B
gene18518_MCTS1	MCTS1
gene18537_HIF1A	hypoxia inducible factor 1 alpha subunit
gene18545_LOC110090020	trichohyalin-like
gene18582_LOC110090062	integrin alpha-M-like
gene18583_CD2BP2	CD2 cytoplasmic tail binding protein 2
gene18585_TBC1D10B	TBC1 domain family member 10B
gene18586_MYLPF	myosin light chain
gene18587_QPRT	quinolinate phosphoribosyltransferase
gene18607_CCK	cholecystokinin
gene18617_CUNH12orf49	chromosome unknown C12orf49 homolog
gene1862_KITLG	KIT ligand
gene18641_AFF4	AF4/FMR2 family member 4
gene18653_PPM1A	protein phosphatase
gene18654_DHRS7	dehydrogenase/reductase 7
gene18669_LOC110090169	zinc finger protein RFP-like
gene18674_MDC1	mediator of DNA damage checkpoint 1
gene18692_LOC110090188	steroid 21-hydroxylase-like
gene18696_LOC110090190	A.superbus venom factor 1-like
gene18705_ROR1	receptor tyrosine kinase like orphan receptor 1
gene1871_ALX1	ALX homeobox 1
gene18729_MEF2D	myocyte enhancer factor 2D
gene18738_CALB1	calbindin 1
gene18742_KLHL31	kelch like family member 31
gene1875_TMTC2	transmembrane and tetratricopeptide repeat containing 2
gene18754_TRAF6	TNF receptor associated factor 6
gene18757_NDUFA1	NADH:ubiquinone oxidoreductase subunit A1
gene1876_METTL25	methyltransferase like 25
gene18760_SOWAHD	sosondowah ankyrin repeat domain family member D
gene18763_UBE2A	ubiquitin conjugating enzyme E2 A
gene18770_KIAA1210	KIAA1210 ortholog
gene1878_PPFIA2	PTPRF interacting protein alpha 2
gene18793_LOC110090300	keratin
gene18811_NRK	Nik related kinase
gene18812_RFWD2	ring finger and WD repeat domain 2
gene18816_DIS3L2	DIS3 like 3'-5' exoribonuclease 2
gene18826_SREBF1	sterol regulatory element binding transcription factor 1
gene18833_PDGFA	platelet derived growth factor subunit A
gene18903_LOC110090344	uncharacterized LOC110090344
gene18922_CUNH16orf72	chromosome unknown C16orf72 homolog
gene1895_COL2A1	collagen type II alpha 1 chain
gene18969_LOC110090485	early activation antigen CD69-like
gene18972_LOC110090477	zinc-binding protein A33-like
gene18973_LOC110090488	uncharacterized LOC110090488
gene18980_LOC110090500	apolipophorins-like
gene18998_DPYSL2	dihydropyrimidinase like 2
gene18999_BNIP3L	BCL2 interacting protein 3 like
gene19016_LOC110090533	uncharacterized LOC110090533
gene19019_FAM168A	family with sequence similarity 168 member A
gene19029_PBK	PDZ binding kinase
gene19033_LOC110090542	uncharacterized LOC110090542
gene1904_PIP4K2C	phosphatidylinositol-5-phosphate 4-kinase type 2 gamma
gene19040_NECAB3	N-terminal EF-hand calcium binding protein 3
gene19042_E2F1	E2F transcription factor 1
gene19048_PLEKHG4B	pleckstrin homology and RhoGEF domain containing G4B
gene19049_CCDC127	coiled-coil domain containing 127
gene19052_CHMP5	charged multivesicular body protein 5
gene19054_RUNX1T1	RUNX1 translocation partner 1
gene19056_KIFAP3	kinesin associated protein 3
gene19057_SCYL3	SCY1 like pseudokinase 3
gene19068_NDUFA13	NADH:ubiquinone oxidoreductase subunit A13
gene1907_MBD6	methyl-CpG binding domain protein 6
gene19071_MAU2	MAU2 sister chromatid cohesion factor
gene19076_NR2C2AP	nuclear receptor 2C2 associated protein
gene19079_PQBP1	polyglutamine binding protein 1
gene19083_GATA1	GATA binding protein 1
gene19095_LOC110090625	serpin B10-like
gene19096_LOC110090624	leukocyte elastase inhibitor-like
gene19098_LOC110090628	phosphatase and actin regulator 1-like
gene191_LOC110082664	vacuolar protein 8-like
gene19101_LOC110090641	zinc finger and SCAN domain-containing protein 21-like
gene19117_LOC110090633	zinc finger protein 845-like
gene1912_LOC110070841	rho GTPase-activating protein 9-like
gene19122_LOC110090637	zinc finger protein 501-like
gene19123_LOC110090650	zinc finger protein 202-like
gene19130_CMTM4	CKLF like MARVEL transmembrane domain containing 4
gene19136_PRPF6	pre-mRNA processing factor 6
gene19163_LOC110090691	guanylate-binding protein 4-like
gene19179_ALS2	ALS2
gene19209_CWC25	CWC25 spliceosome associated protein homolog
gene19211_PSMB3	proteasome subunit beta 3
gene19221_UMPS	uridine monophosphate synthetase
gene19222_LOC110090758	kalirin-like
gene19224_SHCBP1	SHC binding and spindle associated 1
gene19236_OVOL2	ovo like zinc finger 2
gene19237_MGME1	mitochondrial genome maintenance exonuclease 1
gene19238_SNX5	sorting nexin 5
gene19266_LOC110090804	RLA class II histocompatibility antigen
gene19267_LOC110090811	H-2 class II histocompatibility antigen
gene19288_SOX12	SRY-box 12
gene19295_WDR1	WD repeat domain 1
gene19296_SLC2A9	solute carrier family 2 member 9
gene19321_ATP5G1	ATP synthase
gene19330_PHOSPHO1	phosphoethanolamine/phosphocholine phosphatase
gene19339_C2CD2	C2 calcium dependent domain containing 2
gene1935_LOC110071205	gametocyte-specific factor 1-like
gene19365_FXYD1	FXYD domain containing ion transport regulator 1
gene1937_PDE1B	phosphodiesterase 1B
gene1938_PPP1R1A	protein phosphatase 1 regulatory inhibitor subunit 1A
gene19392_LIG4	DNA ligase 4
gene19395_MED4	mediator complex subunit 4
gene19397_SLC9A1	solute carrier family 9 member A1
gene1940_TESPA1	thymocyte expressed
gene19405_SIVA1	SIVA1 apoptosis inducing factor
gene19409_LY6G6F	lymphocyte antigen 6 family member G6F
gene19419_CPSF1	cleavage and polyadenylation specific factor 1
gene19435_GAK	cyclin G associated kinase
gene19441_POLR2B	RNA polymerase II subunit B
gene1946_LOC110071753	twist-related protein 2-like
gene19460_PIK3C3	phosphatidylinositol 3-kinase catalytic subunit type 3
gene19468_LOC110091022	brain-specific angiogenesis inhibitor 1-like
gene19469_LOC110091023	brain-specific angiogenesis inhibitor 1-like
gene19476_KIFC1	kinesin family member C1
gene19480_LOC110091031	tigger transposable element-derived protein 1-like
gene19489_KLHL28	kelch like family member 28
gene1949_LOC110071744	histone H2B 5
gene1950_LOC110071407	histone H2A type 2-B
gene1953_LOC110071419	histone H2B 5
gene19542_POP4	POP4 homolog
gene19556_LOC110091118	calsequestrin-2
gene19565_APCDD1L	APC down-regulated 1 like
gene19569_LOXL1	lysyl oxidase like 1
gene19580_VPS52	VPS52
gene19589_KHDRBS3	KH RNA binding domain containing
gene19596_LOC110091161	thioredoxin reductase 3-like
gene19598_LOC110091163	carbohydrate sulfotransferase 11-like
gene19622_ZNRD1	zinc ribbon domain containing 1
gene19623_PPP1R11	protein phosphatase 1 regulatory inhibitor subunit 11
gene19624_RNF39	ring finger protein 39
gene1963_UBL5	ubiquitin like 5
gene19645_NUGGC	nuclear GTPase
gene19647_LOC110091230	uncharacterized LOC110091230
gene19661_LOC110091216	SLAM family member 9-like
gene19663_LOC110091233	interferon-induced protein 44-like
gene19664_LOC110091231	interferon-induced protein 44-like
gene19698_CUNH8orf82	chromosome unknown C8orf82 homolog
gene1970_CHCHD5	coiled-coil-helix-coiled-coil-helix domain containing 5
gene19706_LOC110091286	nmrA-like family domain-containing protein 1
gene19710_VWA7	von Willebrand factor A domain containing 7
gene19714_LOC110091291	zinc finger protein 91-like
gene19715_LOC110091293	zinc finger protein 84-like
gene19722_LOC110091303	zinc finger protein 709-like
gene19724_MRPL4	mitochondrial ribosomal protein L4
gene19747_NRF1	nuclear respiratory factor 1
gene19755_MZF1	myeloid zinc finger 1
gene19762_LOC110091354	zinc finger protein 420-like
gene19802_KHNYN	KH and NYN domain containing
gene19804_LOC110091392	uncharacterized LOC110091392
gene19805_TFRC	transferrin receptor
gene19814_EPHA1	EPH receptor A1
gene19825_ENPP3	ectonucleotide pyrophosphatase/phosphodiesterase 3
gene19833_POLA1	DNA polymerase alpha 1
gene19870_LOC110091464	zinc finger protein 260-like
gene19880_NARS2	asparaginyl-tRNA synthetase 2
gene19899_MTTP	microsomal triglyceride transfer protein
gene199_HBS1L	HBS1 like translational GTPase
gene19901_LOC110091501	D-threo-3-hydroxyaspartate dehydratase-like
gene19913_LOC110091519	putative nuclease HARBI1
gene1993_JPH2	junctophilin 2
gene19970_KLHL40	kelch like family member 40
gene19972_LOC110091576	forkhead box protein N3-like
gene1999_TP53RK	TP53 regulating kinase
gene20001_LOC110091605	zinc finger protein 420-like
gene20016_LOC110091622	shematrin-like protein 2
gene20025_LOC110091633	butyrophilin subfamily 2 member A2-like
gene20026_LOC110091637	tripartite motif-containing protein 10-like
gene20029_LOC110091636	C-type lectin domain family 2 member E-like
gene20033_LOC110091640	zinc finger protein 154-like
gene20036_LOC110091646	zinc finger and SCAN domain-containing protein 16-like
gene20038_LOC110091642	zinc finger protein 500-like
gene20064_LOC110091671	vasotocin-neurophysin VT-like
gene20079_LTB4R2	leukotriene B4 receptor 2
gene20080_LTB4R	leukotriene B4 receptor
gene20084_LOC110091688	ubiquitin carboxyl-terminal hydrolase CYLD-like
gene20091_IMP3	IMP3
gene20092_DLGAP5	DLG associated protein 5
gene20101_CLDN18	claudin 18
gene20102_DZIP1L	DAZ interacting zinc finger protein 1 like
gene20113_EDN1	endothelin 1
gene20122_LOC110091735	zinc finger protein 135-like
gene20123_LOC110091732	zinc finger protein 2 homolog
gene20131_LOC110091740	zinc finger protein 135-like
gene20148_B4GAT1	beta-1
gene20149_BRMS1	breast cancer metastasis suppressor 1
gene20159_CUNH20orf194	chromosome unknown C20orf194 homolog
gene20161_LOC110069786	alpha-2C adrenergic receptor-like
gene20162_CMPK2	cytidine/uridine monophosphate kinase 2
gene20170_RELA	RELA proto-oncogene
gene2018_LOC110071828	opsin-5-like
gene20182_POMC	proopiomelanocortin
gene2019_SPATA2	spermatogenesis associated 2
gene20196_LOC110069821	zinc finger protein OZF-like
gene2020_RNF114	ring finger protein 114
gene2021_SNAI1	snail family transcriptional repressor 1
gene20215_LOC110069844	hematopoietic cell signal transducer-like
gene20223_RBM8A	RNA binding motif protein 8A
gene20227_LOC110069865	toll-like receptor 2
gene20229_CDCA5	cell division cycle associated 5
gene20232_VPS51	VPS51
gene20233_LOC110069864	toll-like receptor 5
gene20235_ZNHIT2	zinc finger HIT-type containing 2
gene20260_LOC110069890	regulator of G-protein signaling 8-like
gene20261_LOC110069894	uncharacterized LOC110069894
gene20268_AP5B1	adaptor related protein complex 5 beta 1 subunit
gene2028_PTPN1	protein tyrosine phosphatase
gene20287_LOC110069920	zinc finger protein 135-like
gene2029_RIPOR3	RIPOR family member 3
gene20292_LOC110069917	zinc finger protein 160-like
gene20299_LOC110069929	zinc finger protein 420-like
gene2030_PARD6B	par-6 family cell polarity regulator beta
gene20313_LOC110069946	zinc finger protein 554-like
gene2032_DPM1	dolichyl-phosphate mannosyltransferase subunit 1
gene20320_TRIM41	tripartite motif containing 41
gene20325_LOC110069958	vespryn
gene20327_LOC110069954	zinc finger protein RFP-like
gene2034_KCNG1	potassium voltage-gated channel modifier subfamily G member 1
gene20341_LOC110069967	zinc finger protein 665-like
gene20344_LOC110069979	zinc finger protein 664-like
gene20353_LOC110069991	tumor necrosis factor receptor superfamily member 16-like
gene20355_LOC110069990	tubulin beta chain
gene20372_MARF1	meiosis regulator and mRNA stability factor 1
gene20391_LOC110070024	zinc finger protein 202-like
gene20399_LOC110070034	gastrula zinc finger protein XlCGF26.1-like
gene20402_LOC110070037	rap1 GTPase-activating protein 2-like
gene20412_TSKU	tsukushi
gene20417_NDUFB6	NADH:ubiquinone oxidoreductase subunit B6
gene20426_LOC110070061	RING finger protein 112-like
gene2043_ZNF217	zinc finger protein 217
gene20430_LOC110070063	cytochrome b-245 heavy chain-like
gene20463_LOC110070096	zinc finger protein OZF-like
gene20481_LOC110070123	ras-related protein Rab-39B-like
gene20484_LOC110070122	kallikrein-14-like
gene2051_LOC110071837	poly [ADP-ribose] polymerase 14-like
gene2052_LOC110071838	poly [ADP-ribose] polymerase 14-like
gene20520_LOC110070163	zinc finger protein 616-like
gene20529_LOC110070167	zinc finger protein 260-like
gene20538_RAB38	RAB38
gene20547_PFN4	profilin family member 4
gene20552_LOC110070198	zinc finger protein 160-like
gene20560_INTS9	integrator complex subunit 9
gene20565_CAPN1	calpain 1
gene20568_LOC110070210	zinc finger protein 585A-like
gene20569_LOC110070214	zinc finger protein 888-like
gene20572_LOC110070215	zinc finger protein OZF-like
gene20573_LOC110070216	zinc finger protein 420-like
gene20574_EGLN3	egl-9 family hypoxia inducible factor 3
gene20576_LOC110070224	zinc finger protein OZF-like
gene20578_LOC110070223	zinc finger protein 658B-like
gene20583_LOC110070225	NACHT
gene20589_LOC110070237	H-2 class I histocompatibility antigen
gene20590_LOC110070236	zinc finger protein 420-like
gene20599_YOD1	YOD1 deubiquitinase
gene20600_CUNH1orf116	chromosome unknown C1orf116 homolog
gene20609_LOC110070259	beta-defensin C7-like
gene2061_DBI	diazepam binding inhibitor
gene20617_LOC110070269	zinc finger protein 493-like
gene2062_CUNH2orf76	chromosome unknown C2orf76 homolog
gene2063_STEAP3	STEAP3 metalloreductase
gene2064_C1QL2	complement C1q like 2
gene20641_CROT	carnitine O-octanoyltransferase
gene20651_LOC110070305	transcriptional repressor protein YY1-like
gene20655_ATP5I	ATP synthase
gene2066_EN1	engrailed homeobox 1
gene20662_ZNF511	zinc finger protein 511
gene20682_LOC110070340	ferric-chelate reductase 1-like
gene20719_LOC110070378	protoheme IX farnesyltransferase
gene20736_USP18	ubiquitin specific peptidase 18
gene2074_DPP10	dipeptidyl peptidase like 10
gene20742_LOC110070403	anti-Muellerian hormone type-2 receptor-like
gene20744_LOC110070405	muellerian-inhibiting factor-like
gene20764_LOC110070424	tripartite motif-containing protein 7-like
gene20766_LOC110070427	thaicobrin-like
gene20784_LOC110070445	uncharacterized LOC110070445
gene20785_LOC110070443	major histocompatibility complex class I-related gene protein-like
gene20788_CTSB	cathepsin B
gene2079_NCKAP5	NCK associated protein 5
gene20796_LOC110070458	zinc finger protein 2 homolog
gene20822_LOC110070485	zinc finger protein 436-like
gene20835_LOC110070499	zinc finger protein with KRAB and SCAN domains 7-like
gene20846_LOC110070509	vacuolar protein sorting-associated protein 13D-like
gene20883_LOC110070549	zinc finger protein RFP-like
gene2090_MCM6	minichromosome maintenance complex component 6
gene20922_FECH	ferrochelatase
gene20924_LOC110070593	zinc finger protein 850-like
gene20928_IL15RA	interleukin 15 receptor subunit alpha
gene20930_LOC110070601	tubulin alpha-3 chain-like
gene20931_UCN3	urocortin 3
gene20935_LOC110070607	zinc finger protein 208-like
gene20936_LOC110070606	zinc finger protein 420-like
gene20949_LOC110070621	#N/A
gene20961_MRPL48	mitochondrial ribosomal protein L48
gene20987_LOC110070658	ensconsin-like
gene20988_RAP1GAP2	RAP1 GTPase activating protein 2
gene21026_LOC110070694	HRAS-like suppressor 3
gene21028_LOC110070695	HRAS-like suppressor 3
gene21033_LOC110070705	uncharacterized LOC110070705
gene21038_LOC110070712	zinc finger protein 501-like
gene21050_LOC110070727	uncharacterized LOC110070727
gene21065_LOC110070739	uncharacterized LOC110070739
gene21076_LOC110070752	gastrula zinc finger protein XlCGF26.1-like
gene21078_LOC110070756	zinc finger protein 850-like
gene21080_LOC110070758	zinc finger protein 135-like
gene21082_LOC110070760	oocyte zinc finger protein XlCOF15-like
gene21101_LOC110070776	hephaestin-like protein 1
gene21111_LOC110070790	uncharacterized LOC110070790
gene21116_LOC110070794	zinc finger protein 135-like
gene21120_PSMF1	proteasome inhibitor subunit 1
gene21124_NDUFB7	NADH:ubiquinone oxidoreductase subunit B7
gene21126_LOC110070807	zinc finger protein 260-like
gene2114_DNAJB6	DnaJ heat shock protein family (Hsp40) member B6
gene21141_TCF19	transcription factor 19
gene21143_LOC110070825	tripartite motif-containing protein 15-like
gene21144_LOC110070826	tripartite motif-containing protein 7-like
gene21147_LOC110070831	sulfotransferase 6B1-like
gene21167_LOC110070852	zinc finger protein 420-like
gene21168_LOC110070853	interleukin-1 receptor-associated kinase 1-like
gene21184_LOC110070871	zinc finger protein 664-like
gene21188_LOC110070875	putative lysosomal acid lipase/cholesteryl ester hydrolase
gene21208_LOC110070895	uncharacterized LOC110070895
gene21214_NKAP	NFKB activating protein
gene21215_ZBTB33	zinc finger and BTB domain containing 33
gene21230_LOC110070919	zinc finger protein 2 homolog
gene21244_LOC110070935	zinc finger protein 91-like
gene21254_LOC110070946	zinc finger protein 883-like
gene21261_LOC110070956	interferon-inducible GTPase 5-like
gene21281_LOC110070975	zinc finger and SCAN domain-containing protein 16-like
gene21285_LOC110070978	zinc finger protein 658B-like
gene21297_LOC110070993	DLA class II histocompatibility antigen
gene21309_LOC110071006	zinc finger protein 471-like
gene21338_LOC110071035	proteasome subunit beta type-8-like
gene21351_LOC110071050	zinc finger protein 665-like
gene2137_CRYGN	crystallin gamma N
gene21384_LOC110071084	calpain-1 catalytic subunit-like
gene21391_LOC110071092	zinc finger protein 664-like
gene21395_MPRIP	myosin phosphatase Rho interacting protein
gene21400_LOC110071103	uncharacterized LOC110071103
gene21409_LOC110071112	zinc finger protein 436-like
gene21437_LOC110071143	uncharacterized LOC110071143
gene21439_LOC110071144	zinc finger protein OZF-like
gene21440_LOC110071146	#N/A
gene21445_LOC110071154	zinc finger and SCAN domain-containing protein 31-like
gene21452_LOC110071158	zinc finger protein 560-like
gene21455_LOC110071161	zinc finger protein 160-like
gene21457_LOC110071163	zinc finger protein 709-like
gene21461_LOC110071167	zinc finger protein 709-like
gene21472_LOC110071178	zinc finger protein 79-like
gene21473_LOC110071179	zinc finger protein 2 homolog
gene21485_TAP1	transporter 1
gene21493_LOC110071201	zinc finger protein 493-like
gene21505_LOC110071213	AT-rich interactive domain-containing protein 4B-like
gene21525_LOC110071235	zinc finger protein 79-like
gene2153_ADD3	adducin 3
gene21536_LOC110071246	HLA class II histocompatibility antigen
gene2154_MXI1	MAX interactor 1
gene21548_LOC110071259	E3 ubiquitin-protein ligase TRIM39-like
gene21550_LOC110071263	proteasome subunit beta type-9-like
gene21588_LOC110071303	zinc finger protein 658B-like
gene21596_LOC110071311	zinc finger protein 665-like
gene21650_LOC110071368	zinc finger protein 709-like
gene21652_LOC110071370	zinc finger protein 501-like
gene21677_LOC110071395	zinc finger protein 709-like
gene21678_LOC110071396	oocyte zinc finger protein XlCOF6-like
gene21689_LOC110071409	2'-5'-oligoadenylate synthase 3-like
gene217_PLCL2	phospholipase C like 2
gene21736_LOC110071463	zinc finger protein 271-like
gene21745_LOC110071472	zinc finger protein 239-like
gene21750_LOC110071477	zinc finger protein 665-like
gene21751_LOC110071478	zinc finger protein 501-like
gene21754_LOC110071481	putative uncharacterized protein MYH16
gene21767_LOC110071497	F-box only protein 27-like
gene21768_LOC110071498	nuclear export mediator factor NEMF-like
gene2177_ADRB1	adrenoceptor beta 1
gene21780_LOC110071511	phytanoyl-CoA dioxygenase
gene21789_LOC110071520	integrator complex subunit 4-like protein 2
gene21792_LOC110071524	glutathione S-transferase-like
gene21800_LOC110071532	tigger transposable element-derived protein 1-like
gene21808_LOC110071541	SCAN domain-containing protein 1-like
gene2186_FAM160B1	family with sequence similarity 160 member B1
gene21867_LOC110071605	protein Wnt-5a
gene2188_ATRNL1	attractin like 1
gene21884_LOC110071623	transmembrane protein 143-like
gene21909_LOC110071650	interferon-induced protein with tetratricopeptide repeats 5-like
gene21917_LOC110071658	transcription termination factor 1-like
gene21935_TIMM8B	translocase of inner mitochondrial membrane 8 homolog B
gene21949_LOC110071691	toll-like receptor 5
gene21968_LOC110071712	BTB/POZ domain-containing protein KCTD14-like
gene21973_LOC110071717	NADH dehydrogenase [ubiquinone] iron-sulfur protein 8
gene21978_LOC110071722	THAP domain-containing protein 7-like
gene2198_HSPA12A	heat shock protein family A (Hsp70) member 12A
gene21985_LOC110071729	ubiquitin-conjugating enzyme E2 L3-like
gene2199_ENO4	enolase family member 4
gene220_OXNAD1	oxidoreductase NAD binding domain containing 1
gene2222_EPB41L4A	erythrocyte membrane protein band 4.1 like 4A
gene2226_DCP2	decapping mRNA 2
gene2237_CDO1	cysteine dioxygenase type 1
gene2238_ATG12	autophagy related 12
gene2241_ARL14EPL	ADP ribosylation factor like GTPase 14 effector protein like
gene2243_SEMA6A	semaphorin 6A
gene2256_NT5DC4	5'-nucleotidase domain containing 4
gene2259_IL1B	interleukin 1 beta
gene2262_XPO7	exportin 7
gene2264_DMTN	dematin actin binding protein
gene2266_FAM160B2	family with sequence similarity 160 member B2
gene2279_KANSL3	KAT8 regulatory NSL complex subunit 3
gene2280_DUSP11	dual specificity phosphatase 11
gene2282_ACTG2	actin
gene2284_TET3	tet methylcytosine dioxygenase 3
gene2285_BOLA3	bolA family member 3
gene2286_MTHFD2	methylenetetrahydrofolate dehydrogenase (NADP+ dependent) 2
gene2293_SNRNP27	small nuclear ribonucleoprotein U4/U6.U5 subunit 27
gene2300_SNRPG	small nuclear ribonucleoprotein polypeptide G
gene2307_LOC110072216	uncharacterized protein FLJ45252-like
gene2315_CDS2	CDP-diacylglycerol synthase 2
gene2316_PCNA	proliferating cell nuclear antigen
gene2324_PROM2	prominin 2
gene2337_NCAPH	non-SMC condensin I complex subunit H
gene2357_LOC110072142	histone H2A.V-like
gene2359_POLM	DNA polymerase mu
gene2361_LOC110072226	SH2 domain-containing protein 6-like
gene2368_ANK1	ankyrin 1
gene2369_NKX6-3	NK6 homeobox 3
gene2390_NSD3	nuclear receptor binding SET domain protein 3
gene240_HIBADH	3-hydroxyisobutyrate dehydrogenase
gene2406_LOC110072186	tumor necrosis factor receptor superfamily member 10A-like
gene2407_CHMP7	charged multivesicular body protein 7
gene2413_SLC25A37	solute carrier family 25 member 37
gene2414_NKX3-1	NK3 homeobox 1
gene2424_ANAPC4	anaphase promoting complex subunit 4
gene2427_SEPSECS	Sep (O-phosphoserine) tRNA:Sec (selenocysteine) tRNA synthase
gene2435_LCTL	lactase like
gene2447_CSNK1A1	casein kinase 1 alpha 1
gene245_HOXA10	homeobox A10
gene2452_SLC26A2	solute carrier family 26 member 2
gene2454_HTR4	5-hydroxytryptamine receptor 4
gene2455_FBXO38	F-box protein 38
gene246_HOXA9	homeobox A9
gene2461_LOC110072309	ovomucoid-like
gene247_HOXA7	homeobox A7
gene2472_SPDL1	spindle apparatus coiled-coil protein 1
gene2475_RARS	arginyl-tRNA synthetase
gene2477_TENM2	teneurin transmembrane protein 2
gene248_HOXA3	homeobox A3
gene2480_TSPAN2	tetraspanin 2
gene2481_LOC110072315	mitochondrial glutamate carrier 1-like
gene2490_DENND2C	DENN domain containing 2C
gene2491_BCAS2	BCAS2
gene2496_HIPK1	homeodomain interacting protein kinase 1
gene251_HOXA5	homeobox A5
gene2511_MOV10	Mov10 RISC complex RNA helicase
gene2517_DDX20	DEAD-box helicase 20
gene2521_ATP5F1	ATP synthase
gene2523_CUNH6orf132	chromosome unknown C6orf132 homolog
gene2528_IRF6	interferon regulatory factor 6
gene2530_TRAF3IP3	TRAF3 interacting protein 3
gene254_HOXA1	homeobox A1
gene2544_MYL1	myosin light chain 1
gene2554_LOC110072396	shugoshin 2-like
gene2558_FZD5	frizzled class receptor 5
gene257_SNX10	sorting nexin 10
gene2584_LOC110072721	mucin-16-like
gene2588_OAZ1	ornithine decarboxylase antizyme 1
gene2591_SF3A2	splicing factor 3a subunit 2
gene2592_PLEKHJ1	pleckstrin homology domain containing J1
gene2598_MKNK2	MAP kinase interacting serine/threonine kinase 2
gene260_CUNH7orf31	chromosome unknown C7orf31 homolog
gene2606_TCF3	transcription factor 3
gene261_LOC110072471	cytochrome c
gene2611_SIRT6	sirtuin 6
gene262_OSBPL3	oxysterol binding protein like 3
gene263_DFNA5	DFNA5
gene2642_NRTN	neurturin
gene2660_BABAM1	BRISC and BRCA1 A complex member 1
gene2664_KCNN1	potassium calcium-activated channel subfamily N member 1
gene2665_CCDC124	coiled-coil domain containing 124
gene2677_LOC110072509	guanine nucleotide-binding protein G(I)/G(S)/G(O) subunit gamma-7
gene2679_LOC110072508	protein B4-like
gene27_COQ3	coenzyme Q3
gene2701_PRSS57	protease
gene2703_LOC110072527	ubiquitin-60S ribosomal protein L40
gene2706_CRLF1	cytokine receptor like factor 1
gene271_IGF2BP3	insulin like growth factor 2 mRNA binding protein 3
gene2710_COMP	cartilage oligomeric matrix protein
gene2711_UPF1	UPF1
gene2722_SLC25A42	solute carrier family 25 member 42
gene2724_MEF2B	myocyte enhancer factor 2B
gene2725_TMEM221	transmembrane protein 221
gene274_NUPL2	nucleoporin like 2
gene2743_SIN3B	SIN3 transcription regulator family member B
gene275_FAM126A	family with sequence similarity 126 member A
gene2754_USE1	unconventional SNARE in the ER 1
gene2758_NDUFA11	NADH:ubiquinone oxidoreductase subunit A11
gene2763_LOC110072577	hornerin-like
gene2764_ZNF414	zinc finger protein 414
gene277_TOMM7	translocase of outer mitochondrial membrane 7
gene2778_ISYNA1	inositol-3-phosphate synthase 1
gene2781_DDA1	DET1 and DDB1 associated 1
gene2790_MISP	mitotic spindle positioning
gene2794_MED16	mediator complex subunit 16
gene2795_R3HDM4	R3H domain containing 4
gene2797_ARID3A	AT-rich interaction domain 3A
gene2799_FGF22	fibroblast growth factor 22
gene2801_ARHGAP45	Rho GTPase activating protein 45
gene2809_PDPN	podoplanin
gene2835_PPIH	peptidylprolyl isomerase H
gene2840_PPCS	phosphopantothenoylcysteine synthetase
gene2842_SLC2A1	solute carrier family 2 member 1
gene2847_DFFB	DNA fragmentation factor subunit beta
gene2851_LOC110072707	adherens junction-associated protein 1-like
gene2853_CTNND2	catenin delta 2
gene2864_ANKH	ANKH inorganic pyrophosphate transport regulator
gene287_TMEM196	transmembrane protein 196
gene2872_MYO10	myosin X
gene2876_LOC110072747	ferritin light chain-like
gene2881_MAB21L2	mab-21 like 2
gene2887_FBXW7	F-box and WD repeat domain containing 7
gene2891_TRIM2	tripartite motif containing 2
gene2893_KIAA0922	KIAA0922 ortholog
gene2896_SFRP2	secreted frizzled related protein 2
gene2898_PLRG1	pleiotropic regulator 1
gene2931_LOC110072807	bifunctional heparan sulfate N-deacetylase/N-sulfotransferase 3
gene2934_METTL14	methyltransferase like 14
gene2937_MYOZ2	myozenin 2
gene2953_CCNA2	cyclin A2
gene2965_NUDT6	nudix hydrolase 6
gene2967_SPRY1	sprouty RTK signaling antagonist 1
gene2974_ANKRD50	ankyrin repeat domain 50
gene2979_PLK4	polo like kinase 4
gene299_BZW2	basic leucine zipper and W2 domains 2
gene3_CUNH6orf203	chromosome unknown C6orf203 homolog
gene3014_RIPOR2	RHO family interacting cell polarization regulator 2
gene3024_LOC110072894	probable 2-ketogluconate reductase
gene3027_PQLC1	PQ loop repeat containing 1
gene303_ISPD	isoprenoid synthase domain containing
gene3031_NFATC1	nuclear factor of activated T-cells 1
gene3036_MBP	myelin basic protein
gene3038_ZNF516	zinc finger protein 516
gene3042_ZFAND6	zinc finger AN1-type containing 6
gene3046_WDR93	WD repeat domain 93
gene3047_PEX11A	peroxisomal biogenesis factor 11 alpha
gene3048_PLIN1	perilipin 1
gene3064_MRPS11	mitochondrial ribosomal protein S11
gene307_ETV1	ETS variant 1
gene3070_AKAP13	A-kinase anchoring protein 13
gene3071_LOC110072944	A-kinase anchor protein 13-like
gene3074_SNRPA1	small nuclear ribonucleoprotein polypeptide A'
gene3079_ASB7	ankyrin repeat and SOCS box containing 7
gene3084_LYSMD4	LysM domain containing 4
gene3086_LRRC28	leucine rich repeat containing 28
gene3087_SYNM	synemin
gene309_LOC110073242	uncharacterized LOC110073242
gene3100_LRRC1	leucine rich repeat containing 1
gene3101_MLIP	muscular LMNA interacting protein
gene3102_FAM83B	family with sequence similarity 83 member B
gene3106_BMP5	bone morphogenetic protein 5
gene3114_LOC110073000	DNA primase large subunit-like
gene3127_LOC110073042	phospholipid scramblase 2-like
gene3135_LOC110073048	carboxypeptidase B-like
gene3139_GYG1	glycogenin 1
gene3141_HPS3	HPS3
gene3147_WWTR1	WW domain containing transcription regulator 1
gene3148_COMMD2	COMM domain containing 2
gene3151_PFN2	profilin 2
gene3167_AADAC	arylacetamide deacetylase
gene318_PHF14	PHD finger protein 14
gene319_NXPH1	neurexophilin 1
gene3190_MFAP2	microfibrillar associated protein 2
gene3192_NECAP2	NECAP endocytosis associated 2
gene3202_LOC110073163	uncharacterized LOC110073163
gene3203_FAM131C	family with sequence similarity 131 member C
gene3205_HSPB7	heat shock protein family B (small) member 7
gene3209_FBLIM1	filamin binding LIM protein 1
gene3213_LOC110073169	protein DDI1 homolog 2
gene3235_RCC2	regulator of chromosome condensation 2
gene3239_PAX7	paired box 7
gene327_ASNS	asparagine synthetase (glutamine-hydrolyzing)
gene3270_MAD2L2	mitotic arrest deficient 2 like 2
gene328_LOC110075075	probable helicase with zinc finger domain
gene3291_DFFA	DNA fragmentation factor subunit alpha
gene3292_LOC110073245	cortistatin-like
gene3293_CENPS	centromere protein S
gene3294_PGD	phosphogluconate dehydrogenase
gene330_PITPNC1	phosphatidylinositol transfer protein
gene3302_PIK3CD	phosphatidylinositol-4
gene3304_TMEM201	transmembrane protein 201
gene3305_SLC25A33	solute carrier family 25 member 33
gene3306_SPSB1	splA/ryanodine receptor domain and SOCS box containing 1
gene331_NOL11	nucleolar protein 11
gene3315_RERE	arginine-glutamic acid dipeptide repeats
gene3327_LOC110073274	tyrosine-protein phosphatase non-receptor type 11-like
gene3328_RNF223	ring finger protein 223
gene3342_LOC110073288	lysophosphatidic acid receptor 6-like
gene3343_INTS11	integrator complex subunit 11
gene3349_AURKAIP1	aurora kinase A interacting protein 1
gene335_KPNA2	karyopherin subunit alpha 2
gene3352_MRPL20	mitochondrial ribosomal protein L20
gene3378_CBFA2T2	CBFA2/RUNX1 translocation partner 2
gene3379_SNTA1	syntrophin alpha 1
gene3401_ROMO1	reactive oxygen species modulator 1
gene3404_LOC110073403	fer-1-like protein 4
gene3406_LOC110073366	CMP-N-acetylneuraminate-beta-galactosamide-alpha-2
gene3418_LOC110073375	tubulin alpha-8 chain
gene3419_RABIF	RAB interacting factor
gene3425_TIMM17A	translocase of inner mitochondrial membrane 17A
gene3427_LOC110073381	alpha-1
gene3430_MYOG	myogenin
gene3432_MYBPH	myosin binding protein H
gene3433_DENND2D	DENN domain containing 2D
gene3441_PTPN7	protein tyrosine phosphatase
gene3443_GPR37L1	G protein-coupled receptor 37 like 1
gene3444_ELF3	E74 like ETS transcription factor 3
gene345_ZC3H10	zinc finger CCCH-type containing 10
gene3451_TNNI1	troponin I1
gene3453_LAD1	ladinin 1
gene3454_TNNT2	troponin T2
gene3457_LOC110073401	acetylglutamate kinase-like
gene3459_SOX11	SRY-box 11
gene3470_TSSC1	tumor suppressing subtransferable candidate 1
gene3476_ALKAL2	ALK and LTK ligand 2
gene3478_SH3YL1	SH3 and SYLF domain containing 1
gene3479_FAM110C	family with sequence similarity 110 member C
gene3482_TDRP	testis development related protein
gene3493_CXCL14	C-X-C motif chemokine ligand 14
gene3498_TGFBI	transforming growth factor beta induced
gene350_LOC110073476	zinc finger protein 397-like
gene3502_SPOCK1	SPARC/osteonectin
gene3507_MYOT	myotilin
gene352_SUOX	sulfite oxidase
gene3525_CNOT6	CCR4-NOT transcription complex subunit 6
gene3529_HNRNPH1	heterogeneous nuclear ribonucleoprotein H1
gene353_RAB5B	RAB5B
gene3530_LOC110073482	deoxycytidine kinase-like
gene3536_SQSTM1	sequestosome 1
gene3545_TRIM44	tripartite motif containing 44
gene3547_PAMR1	peptidase domain containing associated with muscle regeneration 1
gene3548_SLC1A2	solute carrier family 1 member 2
gene3549_CD44	CD44 molecule (Indian blood group)
gene3560_LMO2	LIM domain only 2
gene3570_FADD	Fas associated via death domain
gene3575_ORAOV1	oral cancer overexpressed 1
gene3576_CCND1	cyclin D1
gene3585_CSRP3	cysteine and glycine rich protein 3
gene3594_NELL1	neural EGFL like 1
gene3602_CEP55	centrosomal protein 55
gene3611_MARCH5	membrane associated ring-CH-type finger 5
gene3614_LOC110073586	uncharacterized LOC110073586
gene3617_CCNJ	cyclin J
gene3658_ANAPC10	anaphase promoting complex subunit 10
gene3663_USP38	ubiquitin specific peptidase 38
gene3667_INPP4B	inositol polyphosphate-4-phosphatase type II B
gene3670_ZNF330	zinc finger protein 330
gene3691_VSIR	V-set immunoregulatory receptor
gene3701_PALD1	phosphatase domain containing
gene3720_NUDT13	nudix hydrolase 13
gene3721_ECD	ecdysoneless cell cycle regulator
gene3723_DNAJC9	DnaJ heat shock protein family (Hsp40) member C9
gene3740_MPL	MPL proto-oncogene
gene3741_CDC20	cell division cycle 20
gene3743_MED8	mediator complex subunit 8
gene3751_DPH2	DPH2 homolog
gene3754_LOC110073739	von Willebrand factor C domain-containing protein 2-like
gene3755_CCDC24	coiled-coil domain containing 24
gene3756_SLC6A9	solute carrier family 6 member 9
gene3758_LOC110073791	Krueppel-like factor 2
gene3762_RNF220	ring finger protein 220
gene3767_CCDC17	coiled-coil domain containing 17
gene3773_HPDL	4-hydroxyphenylpyruvate dioxygenase like
gene3774_MUTYH	mutY DNA glycosylase
gene3775_TOE1	target of EGR1
gene3781_UROD	uroporphyrinogen decarboxylase
gene3782_HECTD3	HECT domain E3 ubiquitin protein ligase 3
gene3786_TCTEX1D4	Tctex1 domain containing 4
gene3790_GPBP1L1	GC-rich promoter binding protein 1 like 1
gene3809_GRHL2	grainyhead like transcription factor 2
gene381_BLOC1S1	biogenesis of lysosomal organelles complex 1 subunit 1
gene3823_DCAF13	DDB1 and CUL4 associated factor 13
gene3829_ZFPM2	zinc finger protein
gene3846_PIBF1	progesterone immunomodulatory binding factor 1
gene3848_KLF12	Kruppel like factor 12
gene385_ZNF207	zinc finger protein 207
gene3852_COMMD6	COMM domain containing 6
gene3853_UCHL3	ubiquitin C-terminal hydrolase L3
gene3860_CLN5	ceroid-lipofuscinosis
gene3863_SCEL	sciellin
gene3874_CLDN10	claudin 10
gene3878_TGDS	TDP-glucose 4
gene3881_GPC6	glypican 6
gene3884_SNX18	sorting nexin 18
gene3888_NDUFS4	NADH:ubiquinone oxidoreductase subunit S4
gene390_TEFM	transcription elongation factor
gene3900_EMB	embigin
gene3903_MRPS30	mitochondrial ribosomal protein S30
gene3906_PAIP1	poly(A) binding protein interacting protein 1
gene3925_TTC33	tetratricopeptide repeat domain 33
gene3926_PTGER4	prostaglandin E receptor 4
gene3931_ERCC8	ERCC excision repair 8
gene3932_NDUFAF2	NADH:ubiquinone oxidoreductase complex assembly factor 2
gene3940_HTR1A	5-hydroxytryptamine receptor 1A
gene3944_CWC27	CWC27 spliceosome associated protein homolog
gene3952_ERBIN	erbb2 interacting protein
gene3958_CCNB1	cyclin B1
[truncated: 892 more rows]

## Sheet: ZWC3
Gene_ID	Gene_Name
gene10026_LOC110080698	regucalcin-like
gene10059_LOC110080748	protein kinase C epsilon type
gene10081_KLC4	kinesin light chain 4
gene10083_LOC110080730	cullin-9-like
gene10087_LOC110080763	phosphofurin acidic cluster sorting protein 1-like
gene10089_RRP36	ribosomal RNA processing 36
gene10091_KLHDC3	kelch domain containing 3
gene1010_TAF8	TATA-box binding protein associated factor 8
gene10106_FAM114A2	family with sequence similarity 114 member A2
gene10109_GRIA1	glutamate ionotropic receptor AMPA type subunit 1
gene10126_TRMU	tRNA 5-methylaminomethyl-2-thiouridylate methyltransferase
gene10146_ATOH8	atonal bHLH transcription factor 8
gene10171_TXNDC5	thioredoxin domain containing 5
gene10182_LOC110080870	N-acetyllactosaminide beta-1
gene10189_NEDD9	neural precursor cell expressed
gene10199_SLC6A19	solute carrier family 6 member 19
gene10237_OLFML1	olfactomedin like 1
gene10247_LOC110080933	uncharacterized LOC110080933
gene10272_STX5	syntaxin 5
gene10280_GANAB	glucosidase II alpha subunit
gene10282_CUNH11orf98	chromosome unknown C11orf98 homolog
gene10283_POLR2G	RNA polymerase II subunit G
gene10291_GNG3	G protein subunit gamma 3
gene10303_MPZ	myelin protein zero
gene10315_B4GALT3	beta-1
gene10318_TMEM151A	transmembrane protein 151A
gene10319_YIF1A	Yip1 interacting factor homolog A
gene10333_DAP3	death associated protein 3
gene10334_ASH1L	ASH1 like histone lysine methyltransferase
gene10337_PKLR	pyruvate kinase
gene10339_CLK2	CDC like kinase 2
gene10352_SLC50A1	solute carrier family 50 member 1
gene10361_LOC110081056	mothers against decapentaplegic homolog 6-like
gene10363_SHC1	SHC adaptor protein 1
gene10364_PYGO2	pygopus family PHD finger 2
gene1037_LRRN2	leucine rich repeat neuronal 2
gene10374_LOC110081075	formin-like protein 7
gene10381_GCNT7	glucosaminyl (N-acetyl) transferase family member 7
gene10428_LOC110081141	vacuolar fusion protein MON1 homolog B-like
gene1045_NUAK2	NUAK family kinase 2
gene10470_LOC110081179	immunoglobulin lambda-1 light chain-like
gene10488_EBP	emopamil binding protein (sterol isomerase)
gene10500_OTUD5	OTU deubiquitinase 5
gene10503_UCMA	upper zone of growth plate and cartilage matrix associated
gene10514_DHTKD1	dehydrogenase E1 and transketolase domain containing 1
gene10527_MED21	mediator complex subunit 21
gene10549_DOK4	docking protein 4
gene10574_KCTD15	potassium channel tetramerization domain containing 15
gene10577_WTIP	WT1 interacting protein
gene10585_TEPP	testis
gene10590_CSNK2A2	casein kinase 2 alpha 2
gene10591_CCDC113	coiled-coil domain containing 113
gene10594_NDRG4	NDRG family member 4
gene10598_GOT2	glutamic-oxaloacetic transaminase 2
gene10609_LOC110081326	C-factor-like
gene10614_ATP6V0D1	ATPase H+ transporting V0 subunit d1
gene10618_KIAA0895L	KIAA0895 like
gene10619_LOC110081268	fatty acyl-CoA hydrolase precursor
gene10627_VRK1	vaccinia related kinase 1
gene10640_FMNL1	formin like 1
gene10642_MAP3K14	mitogen-activated protein kinase kinase kinase 14
gene10691_NCKIPSD	NCK interacting protein with SH3 domain
gene10698_RRNAD1	ribosomal RNA adenine dimethylase domain containing 1
gene10700_LOC110081556	dnaJ homolog subfamily A member 1-like
gene10712_DCAF8	DDB1 and CUL4 associated factor 8
gene10719_KCNJ9	potassium voltage-gated channel subfamily J member 9
gene10722_LOC110081536	kin of IRRE-like protein 1
gene10725_LOC110081537	uncharacterized LOC110081537
gene10726_LOC110081503	intelectin-1-like
gene10731_LOC110081518	nuclear receptor subfamily 2 group F member 5-like
gene10732_BOLA1	bolA family member 1
gene1075_EXT2	exostosin glycosyltransferase 2
gene10751_TARS2	threonyl-tRNA synthetase 2
gene10766_TNFAIP8L2	TNF alpha induced protein 8 like 2
gene10776_ANXA9	annexin A9
gene10797_TUFT1	tuftelin 1
gene10812_S100A11	S100 calcium binding protein A11
gene10821_TANK	TRAF family member associated NFKB activator
gene1083_SYT13	synaptotagmin 13
gene10833_CUNH7orf25	chromosome unknown C7orf25 homolog
gene10876_LOC110081670	dimethylaniline monooxygenase [N-oxide-forming] 4-like
gene1088_CRY2	cryptochrome circadian clock 2
gene109_OPRM1	opioid receptor mu 1
gene10901_SERPINC1	serpin family C member 1
gene10904_RABGAP1L	RAB GTPase activating protein 1 like
gene10910_TNN	tenascin N
gene1092_LARGE2	LARGE xylosyl- and glucuronyltransferase 2
gene10920_NHLRC1	NHL repeat containing E3 ubiquitin protein ligase 1
gene10956_PDLIM5	PDZ and LIM domain 5
gene10965_ALKBH7	alkB homolog 7
gene1097_CHRM4	cholinergic receptor muscarinic 4
gene10970_PALM3	paralemmin 3
gene11004_LOC110081831	ras-related protein Rab-35-like
gene11005_HCFC1R1	host cell factor C1 regulator 1
gene1104_F2	coagulation factor II
gene11045_LOC110081850	zinc finger and SCAN domain-containing protein 31-like
gene11058_FIZ1	FLT3 interacting zinc finger 1
gene11102_MBOAT7	membrane bound O-acyltransferase domain containing 7
gene11147_SCARF2	scavenger receptor class F member 2
gene11155_LOC110081926	hydroxysteroid 11-beta-dehydrogenase 1-like protein B
gene11165_POP5	POP5 homolog
gene11172_HNF1A	HNF1 homeobox A
gene11175_LIMK2	LIM domain kinase 2
gene1118_LOC110082466	transmembrane protein 178B-like
gene11189_GNAZ	G protein subunit alpha z
gene11203_MED15	mediator complex subunit 15
gene11209_LOC110081961	glutathione S-transferase theta-1-like
gene11210_LOC110081962	glutathione S-transferase theta-1-like
gene11213_LOC110082006	solute carrier family 2
gene11215_LOC110081993	solute carrier family 2
gene11222_LOC110082014	uncharacterized LOC110082014
gene11230_LOC110082018	PCTP-like protein
gene11234_KIAA0141	KIAA0141 ortholog
gene11236_POLR3F	RNA polymerase III subunit F
gene11249_LOC110082042	7-methylguanosine phosphate-specific 5'-nucleotidase-like
gene11252_ASB16	ankyrin repeat and SOCS box containing 16
gene11254_ATXN7L3	ataxin 7 like 3
gene11274_LOC110082060	melanoregulin-like
gene11276_PNMT	phenylethanolamine N-methyltransferase
gene11279_MIEN1	migration and invasion enhancer 1
gene11332_LOC110082087	protocadherin gamma-A6-like
gene11335_LOC110082110	protocadherin gamma-A6-like
gene11336_LOC110082111	protocadherin gamma-B1-like
gene11338_LOC110082096	protocadherin gamma-B4-like
gene11351_NRCAM	neuronal cell adhesion molecule
gene11361_CMTM6	CKLF like MARVEL transmembrane domain containing 6
gene11370_ABHD5	abhydrolase domain containing 5
gene1138_LOC110082355	retinol dehydrogenase 12-like
gene11385_BHLHA15	basic helix-loop-helix family member a15
gene11403_IGSF6	immunoglobulin superfamily member 6
gene11408_EEF2K	eukaryotic elongation factor 2 kinase
gene11429_LOC110082224	acyl-coenzyme A synthetase ACSM3
gene11430_LOC110082173	acyl-coenzyme A synthetase ACSM4
gene11434_LOC110082182	acyl-coenzyme A synthetase ACSM5
gene11448_DIO1	iodothyronine deiodinase 1
gene11449_HSPB11	heat shock protein family B (small) member 11
gene11477_TMEM244	transmembrane protein 244
gene11505_ACADVL	acyl-CoA dehydrogenase
gene11507_ASGR1	asialoglycoprotein receptor 1
gene11518_LOC110082346	diamine acetyltransferase 2-like
gene11521_LOC110082299	asialoglycoprotein receptor 1-like
gene11522_LOC110082384	asialoglycoprotein receptor 1-like
gene11526_LOC110082316	putative nuclease HARBI1
gene11527_MPDU1	mannose-P-dolichol utilization defect 1
gene11530_EPHB4	EPH receptor B4
gene11532_MEPCE	methylphosphate capping enzyme
gene11536_EPO	erythropoietin
gene11540_ACTL6B	actin like 6B
gene11544_SLC12A9	solute carrier family 12 member 9
gene11546_LOC110082395	UDP-GlcNAc:betaGal beta-1
gene11551_LOC110082380	TSC22 domain family protein 4-like
gene11558_CAMTA2	calmodulin binding transcription activator 2
gene11560_KIF1C	kinesin family member 1C
gene11567_RNF167	ring finger protein 167
gene11574_GLTPD2	glycolipid transfer protein domain containing 2
gene11575_VMO1	vitelline membrane outer layer 1 homolog
gene11576_TM4SF5	transmembrane 4 L six family member 5
gene11577_ZMYND15	zinc finger MYND-type containing 15
gene11583_RNASEK	ribonuclease K
gene11634_PLEKHG5	pleckstrin homology and RhoGEF domain containing G5
gene11636_ESPN	espin
gene11647_NPHP4	nephrocystin 4
gene11648_MMP2	matrix metallopeptidase 2
gene11655_RPGRIP1L	RPGRIP1 like
gene11662_RCAN3	RCAN family member 3
gene11674_HMGCL	3-hydroxymethyl-3-methylglutaryl-CoA lyase
gene11675_LOC110082508	interferon alpha-inducible protein 27-like protein 2A
gene11677_LYPLA2	lysophospholipase II
gene11700_LOC110082587	cytochrome P450 2C11-like
gene11701_LOC110082600	cytochrome P450 2C19-like
gene11703_LOC110082603	cathelicidin-related peptide Oh-Cath-like
gene11705_LOC110082538	zinc finger protein 282-like
gene11706_LOC110082539	mucin-19-like
gene11707_CDC25A	cell division cycle 25A
gene11709_LOC110082541	polypeptide N-acetylgalactosaminyltransferase 4-like
gene11711_LOC110082565	EH domain-containing protein 3
gene11715_LOC110082542	uncharacterized LOC110082542
gene11717_CCM2	CCM2 scaffolding protein
gene11719_MYO1G	myosin IG
gene11721_PTPN23	protein tyrosine phosphatase
gene11723_ELP6	elongator acetyltransferase complex subunit 6
gene11734_LOC110082550	zinc finger protein 2-like
gene11738_LOC110082584	uncharacterized LOC110082584
gene11744_RARRES2	retinoic acid receptor responder 2
gene11754_LOC110082590	uncharacterized LOC110082590
gene11756_ATG9B	autophagy related 9B
gene11758_KCNH2	potassium voltage-gated channel subfamily H member 2
gene11759_AOC1	amine oxidase
gene11761_ASIC3	acid sensing ion channel subunit 3
gene11769_IQCA1L	IQ motif containing with AAA domain 1 like
gene11773_SUSD2	sushi domain containing 2
gene11776_LOC110082612	plexin-A4-like
gene11779_EXOC4	exocyst complex component 4
gene1178_MKX	mohawk homeobox
gene11799_DDX39A	DExD-box helicase 39A
gene11806_PRKACA	protein kinase cAMP-activated catalytic subunit alpha
gene11820_STX10	syntaxin 10
gene11824_FBXW9	F-box and WD repeat domain containing 9
gene11848_LOC110082709	cystine/glutamate transporter-like
gene1185_ACBD5	acyl-CoA binding domain containing 5
gene11851_RAB19	RAB19
gene11855_ADCK2	aarF domain containing kinase 2
gene11869_SLC3A1	solute carrier family 3 member 1
gene11878_MARCKSL1	MARCKS like 1
gene11885_DCDC2B	doublecortin domain containing 2B
gene11897_SYNC	syncoilin
gene11899_YARS	tyrosyl-tRNA synthetase
gene11906_AZIN2	antizyme inhibitor 2
gene11912_HPCAL4	hippocalcin like 4
gene11913_LOC110082801	protein FAM49A-like
gene11918_EVA1B	eva-1 homolog B
gene11930_GNL2	G protein nucleolar 2
gene11931_RSPO1	R-spondin 1
gene11932_CUNH1orf109	chromosome unknown C1orf109 homolog
gene11933_MANEAL	mannosidase endo-alpha like
gene11944_CNTFR	ciliary neurotrophic factor receptor
gene11950_PHF24	PHD finger protein 24
gene11963_LOC110082841	killer cell lectin-like receptor subfamily F member 1
gene11964_LOC110082844	B-cell differentiation antigen CD72-like
gene11965_LOC110082803	B-cell differentiation antigen CD72-like
gene11966_LOC110082823	B-cell differentiation antigen CD72-like
gene11968_TMEM8B	transmembrane protein 8B
gene11975_RGP1	RGP1 homolog
gene11978_CREB3	cAMP responsive element binding protein 3
gene11979_TLN1	talin 1
gene11988_AKAP5	A-kinase anchoring protein 5
gene11990_ZBTB1	zinc finger and BTB domain containing 1
gene12_PREP	prolyl endopeptidase
gene12005_SELENOM	selenoprotein M
gene12006_SMTN	smoothelin
gene12009_LOC110082889	apelin receptor-like
gene12010_LOC110082891	zinc finger protein 570-like
gene12022_MTFP1	mitochondrial fission process 1
gene12023_SEC14L2	SEC14 like lipid binding 2
gene12026_LOC110082894	coiled-coil domain-containing protein 157-like
gene12032_GAS2L1	growth arrest specific 2 like 1
gene12035_AP1B1	adaptor related protein complex 1 beta 1 subunit
gene12038_NEFH	neurofilament heavy
gene12039_NIPSNAP1	nipsnap homolog 1
gene12041_LOC110082898	cell death activator CIDE-3-like
gene12042_CIDEC	cell death inducing DFFA like effector c
gene12055_SLC31A1	solute carrier family 31 member 1
gene12056_FKBP15	FK506 binding protein 15
gene12060_ZMYND19	zinc finger MYND-type containing 19
gene12074_RABEPK	Rab9 effector protein with kelch motifs
gene12080_PBX3	PBX homeobox 3
gene12083_LMX1B	LIM homeobox transcription factor 1 beta
gene12096_GARNL3	GTPase activating Rap/RanGAP domain like 3
gene12097_LOC110082937	erythrocyte band 7 integral membrane protein
gene12128_ECHDC3	enoyl-CoA hydratase domain containing 3
gene12137_MYLK	myosin light chain kinase
gene12154_DLGAP4	DLG associated protein 4
gene12178_COG2	component of oligomeric golgi complex 2
gene12179_AGT	angiotensinogen
gene12216_NDUFAF5	NADH:ubiquinone oxidoreductase complex assembly factor 5
gene12268_METTL24	methyltransferase like 24
gene12278_RNF170	ring finger protein 170
gene12289_RIC3	RIC3 acetylcholine receptor chaperone
gene12297_CALCB	calcitonin related polypeptide beta
gene123_MTHFD1L	methylenetetrahydrofolate dehydrogenase (NADP+ dependent) 1-like
gene12310_LOC110083189	protein NipSnap homolog 3B-like
gene12322_ARX	aristaless related homeobox
gene12324_LOC110083239	cytochrome P450 2K4-like
gene12332_SUPT3H	SPT3 homolog
gene12355_GLIS3	GLIS family zinc finger 3
gene12364_FARP1	FERM
gene12387_LOC110083299	frizzled-9-like
gene1239_ENPP6	ectonucleotide pyrophosphatase/phosphodiesterase 6
gene12390_SLC13A5	solute carrier family 13 member 5
gene12393_KIAA0753	KIAA0753 ortholog
gene12398_HIP1	huntingtin interacting protein 1
gene12403_TMEM248	transmembrane protein 248
gene12404_LRRC75A	leucine rich repeat containing 75A
gene12405_AUTS2	AUTS2
gene12430_MAF	MAF bZIP transcription factor
gene12445_SEC31A	SEC31 homolog A
gene12452_ESRRA	estrogen related receptor alpha
gene12457_GPR137	G protein-coupled receptor 137
gene12464_VEGFB	vascular endothelial growth factor B
gene12469_STIP1	stress induced phosphoprotein 1
gene12477_CNDP1	carnosine dipeptidase 1
gene12478_LOC110083373	cytosolic non-specific dipeptidase-like
gene12494_MZT1	mitotic spindle organizing protein 1
gene125_IYD	iodotyrosine deiodinase
gene12506_ASPHD2	aspartate beta-hydroxylase domain containing 2
gene12507_HPS4	HPS4
gene12524_ANKRD13A	ankyrin repeat domain 13A
gene12527_GLTP	glycolipid transfer protein
gene12542_SSH1	slingshot protein phosphatase 1
gene1256_VEGFC	vascular endothelial growth factor C
gene12569_LOC110083471	hepatocyte nuclear factor 4-beta-like
gene12602_INSM2	INSM transcriptional repressor 2
gene12615_CUNH3orf58	chromosome unknown C3orf58 homolog
gene12647_SUSD5	sushi domain containing 5
gene12648_CRTAP	cartilage associated protein
gene12656_PCDH19	protocadherin 19
gene12658_TSPAN6	tetraspanin 6
gene12659_SRPX2	sushi repeat containing protein
gene1266_HAND2	heart and neural crest derivatives expressed 2
gene12670_TIFA	TRAF interacting protein with forkhead associated domain
gene12684_NUS1	NUS1 dehydrodolichyl diphosphate synthase subunit
gene12706_RIN3	Ras and Rab interactor 3
gene12708_LGMN	legumain
gene12717_PRIMA1	proline rich membrane anchor 1
gene12721_CCDC6	coiled-coil domain containing 6
gene12729_LOC110083648	protein NDNF-like
gene1273_PHF2	PHD finger protein 2
gene12730_CCSER2	coiled-coil serine rich protein 2
gene12738_CSGALNACT2	chondroitin sulfate N-acetylgalactosaminyltransferase 2
gene12739_RASGEF1A	RasGEF domain family member 1A
gene12743_LOC110083663	pulmonary surfactant-associated protein D-like
gene12747_LOC110083684	mannose-binding protein-like
gene1275_FAM120A	family with sequence similarity 120A
gene12755_FAM213A	family with sequence similarity 213 member A
gene12773_LOC110083702	arf-GAP with GTPase
gene1278_NINJ1	ninjurin 1
gene12786_IQCE	IQ motif containing E
gene12788_AMZ1	archaelysin family metallopeptidase 1
gene12801_RNF216	ring finger protein 216
gene12802_FSCN1	fascin actin-bundling protein 1
gene12806_SLC29A4	solute carrier family 29 member 4
gene12821_LOC110083740	A-kinase anchor protein 13-like
gene12826_CCT3	chaperonin containing TCP1 subunit 3
gene12837_L3HYPDH	trans-L-3-hydroxyproline dehydratase
gene12841_DACT1	dishevelled binding antagonist of beta catenin 1
gene1286_TKT	transketolase
gene12868_MKRN2OS	MKRN2 opposite strand
gene12880_ERP29	endoplasmic reticulum protein 29
gene12889_FAM109A	family with sequence similarity 109 member A
gene1291_ACTR8	ARP8 actin-related protein 8 homolog
gene12914_HPD	4-hydroxyphenylpyruvate dioxygenase
gene12918_MORN3	MORN repeat containing 3
gene12920_KDM2B	lysine demethylase 2B
gene12924_P2RX4	purinergic receptor P2X 4
gene12925_P2RX7	purinergic receptor P2X 7
gene12926_IFT81	intraflagellar transport 81
gene12936_OGFOD2	2-oxoglutarate and iron dependent oxygenase domain containing 2
gene12943_KMT5A	lysine methyltransferase 5A
gene12964_FGD5	FYVE
gene13001_OSGEPL1	O-sialoglycoprotein endopeptidase like 1
gene13011_NAB1	NGFI-A binding protein 1
gene1302_PTPRQ	protein tyrosine phosphatase
gene13068_LOC110084010	cytochrome P450 2C14-like
gene13071_TEKT3	tektin 3
gene13079_AMER3	APC membrane recruitment protein 3
gene13086_LOC110084052	claudin-15-like
gene13091_CPN1	carboxypeptidase N subunit 1
gene13139_LOC110084091	vitelline membrane outer layer protein 1-like
gene13151_LOC110084101	anthrax toxin receptor 2-like
gene13165_RPP30	ribonuclease P/MRP subunit p30
gene13168_LOC110084115	C-factor-like
gene1318_NAP1L1	nucleosome assembly protein 1 like 1
gene13187_RSRP1	arginine and serine rich protein 1
gene13192_MAN1C1	mannosidase alpha class 1C member 1
gene13196_PAQR7	progestin and adipoQ receptor family member 7
gene13211_HABP4	hyaluronan binding protein 4
gene13252_MDH1	malate dehydrogenase 1
gene13273_INPP5K	inositol polyphosphate-5-phosphatase K
gene13274_PITPNA	phosphatidylinositol transfer protein alpha
gene13275_SLC43A2	solute carrier family 43 member 2
gene13279_TLCD2	TLC domain containing 2
gene13285_RPA1	replication protein A1
gene13286_RTN4RL1	reticulon 4 receptor like 1
gene13287_DPH1	diphthamide biosynthesis 1
gene13289_LOC110084254	uncharacterized LOC110084254
gene13291_SMG6	SMG6
gene13292_POLDIP2	DNA polymerase delta interacting protein 2
gene13295_VTN	vitronectin
gene13296_SARM1	sterile alpha and TIR motif containing 1
gene13300_UNC119	unc-119 lipid binding chaperone
gene13302_ALDOC	aldolase
gene13309_LOC110084291	adenine phosphoribosyltransferase-like
gene13310_RAB34	RAB34
gene13316_FAM222B	family with sequence similarity 222 member B
gene13317_ERAL1	Era like 12S mitochondrial rRNA chaperone 1
gene13323_PIPOX	pipecolic acid and sarcosine oxidase
gene13326_CRYBA1	crystallin beta A1
gene13330_GIT1	GIT ArfGAP 1
gene13339_CPD	carboxypeptidase D
gene13346_DBNL	drebrin like
gene1335_PNKD	paroxysmal nonkinesigenic dyskinesia
gene13364_PRR16	proline rich 16
gene13370_SYN3	synapsin III
gene13371_TIMP3	TIMP metallopeptidase inhibitor 3
gene13374_RTCB	RNA 2'
gene1338_AAMP	angio associated migratory cell protein
gene13380_MTERF2	mitochondrial transcription termination factor 2
gene13381_TMEM263	transmembrane protein 263
gene134_PPIL4	peptidylprolyl isomerase like 4
gene13400_ADPGK	ADP dependent glucokinase
gene13405_CD276	CD276 molecule
gene13406_CUNH15orf59	chromosome unknown C15orf59 homolog
gene13419_ARSA	arylsulfatase A
gene13424_LOC110084426	kelch repeat and BTB domain-containing protein 13-like
gene13426_LOC110084427	dromaiocalcin-1-like
gene13428_IMPDH1	inosine monophosphate dehydrogenase 1
gene13430_PRRT4	proline rich transmembrane protein 4
gene13432_RBM28	RNA binding motif protein 28
gene13434_SND1	staphylococcal nuclease and tudor domain containing 1
gene13435_LRRC4	leucine rich repeat containing 4
gene13438_LOC110084416	uncharacterized LOC110084416
gene13439_DENND6B	DENN domain containing 6B
gene13440_PPP6R2	protein phosphatase 6 regulatory subunit 2
gene13457_ISLR2	immunoglobulin superfamily containing leucine rich repeat 2
gene13458_LOC110084447	immunoglobulin superfamily containing leucine-rich repeat protein-like
gene13462_LOC110084450	cholesterol side-chain cleavage enzyme
gene13473_LOC110084465	cytochrome P450 1A5
gene13474_LOC110084453	cytochrome P450 1A5-like
gene13477_ULK3	unc-51 like kinase 3
gene13487_SEMA3G	semaphorin 3G
gene13488_ACY1	aminoacylase 1
gene13506_TBL2	transducin beta like 2
gene1351_IGFBP2	insulin like growth factor binding protein 2
gene13529_NIPSNAP2	nipsnap homolog 2
gene13531_CCT6A	chaperonin containing TCP1 subunit 6A
gene13545_LIG3	DNA ligase 3
gene13546_RFFL	ring finger and FYVE like domain containing E3 ubiquitin protein ligase
gene1355_XRCC5	X-ray repair cross complementing 5
gene1356_TMEM169	transmembrane protein 169
gene13588_LHFPL2	lipoma HMGIC fusion partner-like 2
gene13620_NCAPD2	non-SMC condensin I complex subunit D2
gene13623_NOP2	NOP2 nucleolar protein
gene13643_TPI1	triosephosphate isomerase 1
gene13648_PTPN6	protein tyrosine phosphatase
gene13656_LOC110084635	solute carrier family 25 member 36-A-like
gene13664_RERGL	RERG like
gene13665_PCDH8	protocadherin 8
gene13688_PSMG3	proteasome assembly chaperone 3
gene13689_TMEM184A	transmembrane protein 184A
gene13690_MAFK	MAF bZIP transcription factor K
gene13692_LOC110084696	integrator complex subunit 1-like
gene13694_MICALL2	MICAL like 2
gene13701_LOC110084706	cytochrome P450 2W1-like
gene13704_LRFN2	leucine rich repeat and fibronectin type III domain containing 2
gene1371_MRAS	muscle RAS oncogene homolog
gene13719_EDN3	endothelin 3
gene13751_WASHC3	WASH complex subunit 3
gene13757_PAH	phenylalanine hydroxylase
gene13765_HCFC2	host cell factor C2
gene13772_ALDH1L2	aldehyde dehydrogenase 1 family member L2
gene13798_LOC110084805	cytochrome c1
gene138_SASH1	SAM and SH3 domain containing 1
gene13809_HSF1	heat shock transcription factor 1
gene13820_LOC110084815	uncharacterized LOC110084815
gene13822_GPT	glutamic--pyruvic transaminase
gene13829_PTK2	protein tyrosine kinase 2
gene13838_LARS2	leucyl-tRNA synthetase 2
gene1385_IQCB1	IQ motif containing B1
gene13859_NPHP3	nephrocystin 3
gene13886_F8	coagulation factor VIII
gene13892_LOC110084954	transmembrane protein 47-like
gene13900_XPNPEP2	X-prolyl aminopeptidase 2
gene13924_TMEM35A	transmembrane protein 35A
gene13925_SLITRK2	SLIT and NTRK like family member 2
gene13932_F9	coagulation factor IX
gene13933_LOC110084966	coagulation factor IX-like
gene13957_NTHL1	nth like DNA glycosylase 1
gene13959_PKD1	polycystin 1
gene1397_FGF1	fibroblast growth factor 1
gene13977_CACNG3	calcium voltage-gated channel auxiliary subunit gamma 3
gene13979_TNRC6A	trinucleotide repeat containing 6A
gene13984_LOC110085026	GTP-binding protein Rhes-like
gene13990_COG7	component of oligomeric golgi complex 7
gene13995_LOC110084999	heparan sulfate glucosamine 3-O-sulfotransferase 4
gene14011_SMAD7	SMAD family member 7
gene14022_SEC11C	SEC11 homolog C
gene14046_PTH1R	parathyroid hormone 1 receptor
gene14051_JMJD4	jumonji domain containing 4
gene14053_WNT9A	Wnt family member 9A
gene14059_GJC2	gap junction protein gamma 2
gene14095_ORAI2	ORAI calcium release-activated calcium modulator 2
gene14122_GALK1	galactokinase 1
gene14176_CCNI	cyclin I
gene1418_SFXN1	sideroflexin 1
gene14187_NUP54	nucleoporin 54
gene14197_GRSF1	G-rich RNA sequence binding factor 1
gene14207_TMEM167B	transmembrane protein 167B
gene14249_AFF1	AF4/FMR2 family member 1
gene14251_LOC110085328	17-beta-hydroxysteroid dehydrogenase 13-like
gene14266_BANK1	B-cell scaffold protein with ankyrin repeats 1
gene14278_TXNRD2	thioredoxin reductase 2
gene14306_LOC110085384	kynurenine/alpha-aminoadipate aminotransferase
gene14327_SVIP	small VCP interacting protein
gene14344_AFF3	AF4/FMR2 family member 3
gene14358_LOC110085416	acetylserotonin O-methyltransferase-like
gene14359_LOC110085441	acetylserotonin O-methyltransferase-like
gene14360_LOC110085442	acetylserotonin O-methyltransferase-like
gene14388_TIPIN	TIMELESS interacting protein
gene14398_BCO1	beta-carotene oxygenase 1
gene14400_CMIP	c-Maf inducing protein
gene14417_LOC110085489	protein arginine N-methyltransferase 7-like
gene14418_SLC7A6OS	solute carrier family 7 member 6 opposite strand
gene1442_UBTD2	ubiquitin domain containing 2
gene14422_LOC110085494	cytochrome P450 2J2-like
gene14465_LOC110085547	fructose-1
gene14470_LOC110085575	myelomonocytic growth factor-like
gene14476_CASC3	cancer susceptibility 3
gene14491_FAM53A	family with sequence similarity 53 member A
gene14494_TACC3	transforming acidic coiled-coil containing protein 3
gene14514_LMF1	lipase maturation factor 1
gene14518_GLUD1	glutamate dehydrogenase 1
gene14527_GRID1	glutamate ionotropic receptor delta type subunit 1
gene14549_POLD4	DNA polymerase delta 4
gene14550_LOC110085668	glycine N-acyltransferase-like protein 3
gene14551_LOC110085627	glycine N-acyltransferase-like protein 3
gene14553_RAD9A	RAD9 checkpoint clamp component A
gene14557_RPS6KB2	ribosomal protein S6 kinase B2
gene14561_ACY3	aminoacylase 3
gene14568_MAX	MYC associated factor X
gene14611_GNAO1	G protein subunit alpha o1
gene14639_GREM1	gremlin 1
gene14670_HOXD8	homeobox D8
gene14671_HOXD9	homeobox D9
gene14679_MIF4GD	MIF4G domain containing
gene1468_RARB	retinoic acid receptor beta
gene14696_CDR2L	cerebellar degeneration related protein 2 like
gene14700_USH1G	USH1 protein network component sans
gene14713_PLCD1	phospholipase C delta 1
gene14747_NDRG1	N-myc downstream regulated 1
gene14748_WISP1	WNT1 inducible signaling pathway protein 1
gene14772_MGAT5B	mannosyl (alpha-1
gene14790_AHCY	adenosylhomocysteinase
gene14796_IER3IP1	immediate early response 3 interacting protein 1
gene14805_CUNH18orf25	chromosome unknown C18orf25 homolog
gene14808_PSTPIP2	proline-serine-threonine phosphatase interacting protein 2
gene14813_FGF12	fibroblast growth factor 12
gene14823_P3H2	prolyl 3-hydroxylase 2
gene14829_FBXL5	F-box and leucine rich repeat protein 5
gene14833_DKK1	dickkopf WNT signaling pathway inhibitor 1
gene14849_ADRA1D	adrenoceptor alpha 1D
gene14850_SMOX	spermine oxidase
gene14851_RNF24	ring finger protein 24
gene14856_ITGA8	integrin subunit alpha 8
gene14869_MRC1	mannose receptor C-type 1
gene14879_GORASP2	golgi reassembly stacking protein 2
gene14881_METTL8	methyltransferase like 8
gene14888_METAP1D	methionyl aminopeptidase type 1D
gene14889_DLX1	distal-less homeobox 1
gene14907_LOC110086036	uncharacterized LOC110086036
gene14949_ARSI	arylsulfatase family member I
gene14953_NDST1	N-deacetylase and N-sulfotransferase 1
gene14957_LOC110086096	HRAS-like suppressor 3
gene14959_TWIST2	twist family bHLH transcription factor 2
gene14964_LOC110086107	UDP-glucuronosyltransferase 1-6-like
gene14999_TCEA3	transcription elongation factor A3
gene15030_RIC8A	RIC8 guanine nucleotide exchange factor A
gene1504_MPC1	mitochondrial pyruvate carrier 1
gene15065_SNX21	sorting nexin family member 21
gene15074_LOC110086218	ankyrin repeat domain-containing protein SOWAHA-like
gene15075_ZNF335	zinc finger protein 335
gene15077_SLC12A5	solute carrier family 12 member 5
gene15078_NCOA5	nuclear receptor coactivator 5
gene15093_MCM7	minichromosome maintenance complex component 7
gene15100_MFSD7	major facilitator superfamily domain containing 7
gene15104_SLC26A1	solute carrier family 26 member 1
gene15106_SDSL	serine dehydratase like
gene15107_LOC110086281	L-serine dehydratase/L-threonine deaminase-like
gene15110_TPCN1	two pore segment channel 1
gene15113_DDX54	DEAD-box helicase 54
gene15115_RASAL1	RAS protein activator like 1
gene15116_DTX1	deltex E3 ubiquitin ligase 1
gene15133_SLC45A2	solute carrier family 45 member 2
gene15141_TGFBR3	transforming growth factor beta receptor 3
gene1515_PRKN	parkin RBR E3 ubiquitin protein ligase
gene1519_PLG	plasminogen
gene15203_ALDH6A1	aldehyde dehydrogenase 6 family member A1
gene15208_LOC110086412	zinc finger protein 197-like
gene15211_BCL7C	BCL tumor suppressor 7C
gene15227_LOC110086406	vitamin K epoxide reductase complex subunit 1-like protein 1
gene15230_BCKDK	branched chain ketoacid dehydrogenase kinase
gene15233_LOC110086400	sulfotransferase 1C2-like
gene15248_ARMC5	armadillo repeat containing 5
gene15287_NAT14	N-acetyltransferase 14 (putative)
gene15288_ZNF628	zinc finger protein 628
gene15292_LOC110086457	deleted in malignant brain tumors 1 protein-like
gene15295_CUNH19orf68	chromosome unknown C19orf68 homolog
gene15297_ATF5	activating transcription factor 5
gene15298_SULT2A1	sulfotransferase family 2A member 1
gene15299_LOC110086485	rho guanine nucleotide exchange factor 40-like
gene15354_ATPAF1	ATP synthase mitochondrial F1 complex assembly factor 1
gene15362_LOC110086554	cytochrome P450 4A6-like
gene15363_PDZK1IP1	PDZK1 interacting protein 1
gene15368_FOXD2	forkhead box D2
gene15382_HEATR3	HEAT repeat containing 3
gene15411_LOC110086610	transcription factor COE3-like
gene15413_LOC110086606	probable N-acetyltransferase camello
gene15415_LOC110086613	putative N-acetyltransferase 8B
gene15419_SMYD5	SMYD family member 5
gene15446_LOC110086651	putative P2Y purinoceptor 10
gene1545_TMEM181	transmembrane protein 181
gene15453_LOC110086638	protein FAM46C-like
gene15465_ANGPTL3	angiopoietin like 3
gene15472_PGM1	phosphoglucomutase 1
gene15478_NUP35	nucleoporin 35
gene15500_CPPED1	calcineurin like phosphoesterase domain containing 1
gene15509_NME3	NME/NM23 nucleoside diphosphate kinase 3
gene15517_NOL4L	nucleolar protein 4 like
gene15521_KIF3B	kinesin family member 3B
gene15530_TTLL9	tubulin tyrosine ligase like 9
gene15532_LOC110086716	interferon regulatory factor 4-like
gene15540_MAT2B	methionine adenosyltransferase 2B
gene15550_LOC110086777	toll-like receptor 13
gene15556_LOC110086753	cornifelin homolog
gene15558_ATP1A3	ATPase Na+/K+ transporting subunit alpha 3
gene15569_CIC	capicua transcriptional repressor
gene15584_LOC110086798	putative hexokinase HKDC1
gene15589_DDX21	DExD-box helicase 21
gene15597_PBLD	phenazine biosynthesis like protein domain containing
gene15599_LOC110086802	myopalladin-like
gene15608_MEGF6	multiple EGF like domains 6
gene15611_TP73	tumor protein p73
gene15616_SLC45A1	solute carrier family 45 member 1
gene15624_WNT4	Wnt family member 4
gene15625_SORD	sorbitol dehydrogenase
gene15634_TRIP4	thyroid hormone receptor interactor 4
gene15635_ZNF609	zinc finger protein 609
gene15636_OAZ2	ornithine decarboxylase antizyme 2
gene15639_COMMD4	COMM domain containing 4
gene15644_HYKK	hydroxylysine kinase
gene15647_CHRNA3	cholinergic receptor nicotinic alpha 3 subunit
gene15648_CHRNB4	cholinergic receptor nicotinic beta 4 subunit
gene1565_LOC110088037	OX-2 membrane glycoprotein-like
gene15662_SLC7A13	solute carrier family 7 member 13
gene15667_LAMA5	laminin subunit alpha 5
gene1567_CGGBP1	CGG triplet repeat binding protein 1
gene15682_CORO2B	coronin 2B
gene15687_CALML4	calmodulin like 4
gene15694_RAB30	RAB30
gene15703_LOC110086921	MAPK regulated corepressor interacting protein 2-like
gene15704_ABCA3	ATP binding cassette subfamily A member 3
gene15705_VRK3	vaccinia related kinase 3
gene15708_LOC110086915	transmembrane protein 100-like
gene15711_NTN3	netrin 3
gene15717_JOSD2	Josephin domain containing 2
gene15718_ASPDH	aspartate dehydrogenase domain containing
gene15731_SPIB	Spi-B transcription factor
gene15750_KIF3C	kinesin family member 3C
gene15753_DNMT3A	DNA methyltransferase 3 alpha
gene15756_TMEM214	transmembrane protein 214
gene15759_EMILIN1	elastin microfibril interfacer 1
gene15761_KHK	ketohexokinase
gene15764_PREB	prolactin regulatory element binding
gene15765_SLC5A6	solute carrier family 5 member 6
gene15767_CAD	carbamoyl-phosphate synthetase 2
gene15768_MPV17	MPV17
gene15772_LOC110086994	uridine-cytidine kinase-like 1
gene15780_NRBP1	nuclear receptor binding protein 1
gene15784_FNDC4	fibronectin type III domain containing 4
gene15786_LOC110086971	coiled-coil domain-containing protein 166-like
gene15792_POLR1B	RNA polymerase I subunit B
gene15801_BUB1	BUB1 mitotic checkpoint serine/threonine kinase
gene1581_RIOX2	ribosomal oxygenase 2
gene15810_LOC110087040	H(+)/Cl(-) exchange transporter 7-like
gene15823_NUBP1	nucleotide binding protein 1
gene15824_TVP23A	trans-golgi network vesicle protein 23 homolog A
gene15828_CLEC16A	C-type lectin domain containing 16A
gene15842_IARS2	isoleucyl-tRNA synthetase 2
gene15846_LOC110087070	cytochrome c oxidase subunit 4 isoform 1
gene15848_IRF8	interferon regulatory factor 8
gene15861_RTN4	reticulon 4
gene15866_LOC110087093	melanotransferrin-like
gene15869_LOC110087109	D-beta-hydroxybutyrate dehydrogenase
gene15873_PPP1R2	protein phosphatase 1 regulatory inhibitor subunit 2
gene15874_ACAP2	ArfGAP with coiled-coil
gene15875_XXYLT1	xyloside xylosyltransferase 1
gene15877_LSG1	large 60S subunit nuclear export GTPase 1
gene15896_LOC110087134	cytoplasmic phosphatidylinositol transfer protein 1-like
gene15899_SEPT12	septin 12
gene15902_SMIM22	small integral membrane protein 22
gene1591_CD247	CD247 molecule
gene15911_SEC14L5	SEC14 like lipid binding 5
gene15912_LOC110087137	protein FAM173A-like
gene15916_PMM2	phosphomannomutase 2
gene15944_PTPN14	protein tyrosine phosphatase
gene15957_ARPC1B	actin related protein 2/3 complex subunit 1B
gene15961_PTCD1	pentatricopeptide repeat domain 1
gene15966_NATD1	N-acetyltransferase domain containing 1
gene15968_DHRS7B	dehydrogenase/reductase 7B
gene15977_PRKAR1B	protein kinase cAMP-dependent type I regulatory subunit beta
gene15993_GPR26	G protein-coupled receptor 26
gene15995_LOC110087234	uncharacterized LOC110087234
gene15998_PDLIM1	PDZ and LIM domain 1
gene16004_SPRN	shadow of prion protein
gene16005_MTG1	mitochondrial ribosome associated GTPase 1
gene16008_CXCL12	C-X-C motif chemokine ligand 12
gene16020_LOC110087258	lipoma HMGIC fusion partner-like protein 4
gene16023_LOC110087263	probable peptidyl-tRNA hydrolase 2
gene16026_PLXNB1	plexin B1
gene16037_GABBR1	gamma-aminobutyric acid type B receptor subunit 1
gene16046_PLA2G12A	phospholipase A2 group XIIA
gene1605_LOC110088482	T-lymphocyte activation antigen CD86-like
gene16057_SFPQ	splicing factor proline and glutamine rich
gene16061_LOC110087312	interferon alpha-inducible protein 27-like protein 2A
gene16062_MAP7D1	MAP7 domain containing 1
gene16072_LOC110087299	protein argonaute-1
gene16075_CUNH1orf216	chromosome unknown C1orf216 homolog
gene16079_RND3	Rho family GTPase 3
gene16091_FLI1	Fli-1 proto-oncogene
gene16103_PPP1R13B	protein phosphatase 1 regulatory subunit 13B
gene16125_LOC110087362	tyrosine-protein kinase SgK223-like
gene16140_CENPV	centromere protein V
gene1616_PDZK1	PDZ domain containing 1
gene16162_ULK2	unc-51 like autophagy activating kinase 2
gene16167_NXN	nucleoredoxin
gene16168_MRM3	mitochondrial rRNA methyltransferase 3
gene16171_FAM57A	family with sequence similarity 57 member A
gene16173_RFLNB	refilin B
gene16191_LOC110087464	uncharacterized LOC110087464
gene16198_ALAD	aminolevulinate dehydratase
gene162_AIG1	androgen induced 1
gene16213_ANAPC2	anaphase promoting complex subunit 2
gene16219_LOC110087433	protein AMBP-like
gene16221_RABL6	RAB
gene16228_C8G	complement C8 gamma chain
gene16230_LOC110087465	lipocalin-15-like
gene16231_LOC110087468	lipocalin-15-like
gene16239_FAM207A	family with sequence similarity 207 member A
gene16240_KMO	kynurenine 3-monooxygenase
gene16254_LOC110087494	potassium voltage-gated channel subfamily A member 6-like
gene16265_RTBDN	retbindin
gene16283_PCK2	phosphoenolpyruvate carboxykinase 2
gene16289_ADGRB2	adhesion G protein-coupled receptor B2
gene16302_PSEN2	presenilin 2
gene16308_FUT4	fucosyltransferase 4
gene16322_CHRNA4	cholinergic receptor nicotinic alpha 4 subunit
gene16331_CHORDC1	cysteine and histidine rich domain containing 1
gene16348_ME3	malic enzyme 3
gene16367_SALL2	spalt like transcription factor 2
gene16383_LOC110087662	zinc finger BED domain-containing protein 6-like
gene16430_LOC110087635	vigilin-like
gene16431_ARHGEF15	Rho guanine nucleotide exchange factor 15
gene16432_PLOD3	procollagen-lysine
gene16469_LOC110087753	hydroperoxide isomerase ALOXE3-like
gene16474_KCNAB3	potassium voltage-gated channel subfamily A regulatory beta subunit 3
gene16478_TMEM88	transmembrane protein 88
gene16483_EFNB3	ephrin B3
gene16485_LOC110087758	diamine acetyltransferase 2-like
gene16486_LOC110087747	uncharacterized LOC110087747
gene16489_POLR2A	RNA polymerase II subunit A
gene16492_SHBG	sex hormone binding globulin
gene1650_MTFR1	mitochondrial fission regulator 1
gene16506_PTPN20	protein tyrosine phosphatase
gene16508_RBP3	retinol binding protein 3
gene16517_FRMD4A	FERM domain containing 4A
gene16522_WNT11	Wnt family member 11
gene16554_CMTM5	CKLF like MARVEL transmembrane domain containing 5
gene16563_LOC110087810	dehydrogenase/reductase SDR family member 4-like
gene16583_ITIH2	inter-alpha-trypsin inhibitor heavy chain 2
gene16588_GATA3	GATA binding protein 3
gene16605_HAAO	3-hydroxyanthranilate 3
gene16615_LOC110087899	homeobox protein Hox-B8
gene16620_HOXB3	homeobox B3
gene1663_ADHFE1	alcohol dehydrogenase
gene16630_GOLGA3	golgin A3
gene16633_PGAM5	PGAM family member 5
gene16634_ZDHHC8	zinc finger DHHC-type containing 8
gene16637_TRMT2A	tRNA methyltransferase 2 homolog A
gene16651_ERLEC1	endoplasmic reticulum lectin 1
gene16666_GPX3	glutathione peroxidase 3
gene16668_ANXA6	annexin A6
gene16691_SLC16A4	solute carrier family 16 member 4
gene16700_SMAD6	SMAD family member 6
gene16706_CUNH15orf61	chromosome unknown C15orf61 homolog
gene16720_LOC110088015	NADH-cytochrome b5 reductase 3
gene16726_LOC110088041	zinc finger protein RFP-like
gene16729_LOC110088054	zinc finger protein RFP-like
gene16741_LOC110088033	zinc finger protein 157-like
gene16753_LOC110088034	zinc finger protein 883-like
gene16765_LOC110088040	zinc finger protein 436-like
gene16793_RIOX1	ribosomal oxygenase 1
gene16807_TXNIP	thioredoxin interacting protein
gene16808_LOC110088113	intelectin-1-like
gene16809_LOC110088114	intelectin-1-like
gene16817_ANKRD35	ankyrin repeat domain 35
gene16845_TMEM43	transmembrane protein 43
gene16848_UROC1	urocanate hydratase 1
gene16853_GPC3	glypican 3
gene16859_LOC110088158	integrator complex subunit 6-like
gene16864_ADGRG4	adhesion G protein-coupled receptor G4
gene16910_APOOL	apolipoprotein O like
gene16926_FAM213B	family with sequence similarity 213 member B
gene16946_LOC110088279	hydroperoxide isomerase ALOXE3-like
gene1695_CUNH8orf89	chromosome unknown C8orf89 homolog
gene16955_LOC110088260	transcription factor HES-1-like
gene16984_CIDEB	cell death-inducing DFFA-like effector b
gene16995_IPO4	importin 4
gene16999_MYO1B	myosin IB
gene17003_NABP1	nucleic acid binding protein 1
gene17024_AHSG	alpha 2-HS glycoprotein
gene17025_FETUB	fetuin B
gene17027_LOC110088341	T-kininogen 1-like
gene17028_HRG	histidine rich glycoprotein
gene17038_LOC110088374	endothelial zinc finger protein induced by tumor necrosis factor alpha-like
gene1705_TTYH2	tweety family member 2
gene17062_MFAP4	microfibrillar associated protein 4
gene17069_CHM	CHM
gene17072_CETN2	centrin 2
gene17090_WDTC1	WD and tetratricopeptide repeats 1
gene17092_LOC110088419	trophoblast glycoprotein-like
gene171_HECA	hdc homolog
gene17106_PAFAH1B1	platelet activating factor acetylhydrolase 1b regulatory subunit 1
gene17110_TNFAIP1	TNF alpha induced protein 1
gene17111_IFT20	intraflagellar transport 20
gene17117_RABEP1	rabaptin
gene17130_TPM3	tropomyosin 3
gene17134_LOC110088479	cocaine- and amphetamine-regulated transcript protein-like
gene17136_SLC39A1	solute carrier family 39 member 1
gene1714_NPLOC4	NPL4 homolog
gene17144_LOC110088460	protein S100-A16-like
gene17154_INTS3	integrator complex subunit 3
gene17155_SLC27A3	solute carrier family 27 member 3
gene17166_FRK	fyn related Src family tyrosine kinase
gene17181_EDNRB	endothelin receptor type B
gene17183_IPO5	importin 5
gene17187_LOC110088535	bone morphogenetic protein 2-like
gene17219_LOC110088564	glycerophosphodiester phosphodiesterase domain-containing protein 5-like
gene17234_USP35	ubiquitin specific peptidase 35
gene17256_NRN1L	neuritin 1 like
gene17260_CENPT	centromere protein T
gene17262_ST8SIA2	ST8 alpha-N-acetyl-neuraminide alpha-2
gene17273_LOC110088618	alpha-1-antitrypsin-like
gene17274_LOC110088626	alpha-1-antiproteinase-like
gene1728_BAIAP2	BAI1 associated protein 2
gene17298_LOC110088641	complement C1q and tumor necrosis factor-related protein 9-like
gene173_ABRACL	ABRA C-terminal like
gene17326_GC	GC
gene17332_ADAMTS3	ADAM metallopeptidase with thrombospondin type 1 motif 3
gene17342_STK19	serine/threonine kinase 19
gene17348_PRRC2A	proline rich coiled-coil 2A
gene17356_CACNG4	calcium voltage-gated channel auxiliary subunit gamma 4
gene17366_CRMP1	collapsin response mediator protein 1
gene17369_PPP2R2C	protein phosphatase 2 regulatory subunit Bgamma
gene17372_ADD1	adducin 1
gene17380_NMUR1	neuromedin U receptor 1
gene17385_PSMD1	proteasome 26S subunit
gene17386_HTR2B	5-hydroxytryptamine receptor 2B
gene1739_GAA	glucosidase alpha
gene17392_LOC110088757	calcium/calmodulin-dependent 3'
gene17411_GNPNAT1	glucosamine-phosphate N-acetyltransferase 1
gene17438_KIRREL3	kin of IRRE like 3 (Drosophila)
gene1744_CBX8	chromobox 8
gene17443_FOXRED1	FAD dependent oxidoreductase domain containing 1
gene17452_LOC110088832	aldose reductase-like
gene17459_LOC110088827	aldo-keto reductase family 1 member C3 homolog
gene17463_ZC3H14	zinc finger CCCH-type containing 14
gene17477_RIPOR1	RHO family interacting cell polarization regulator 1
gene1749_ENGASE	endo-beta-N-acetylglucosaminidase
gene17493_CAPN10	calpain 10
gene17494_LOC110088883	cytochrome P450 2F2-like
gene17505_LOC110088884	contactin-3-like
gene17507_TLR4	toll like receptor 4
gene17527_LOC110088909	protein phosphatase 1 regulatory subunit 21-like
gene17541_CDON	cell adhesion associated
gene17561_TTI1	TELO2 interacting protein 1
gene17563_TGM2	transglutaminase 2
gene17566_CDK5RAP1	CDK5 regulatory subunit associated protein 1
gene17572_LOC110088953	histone-lysine N-methyltransferase SETD1B-like
gene17588_NUDT9	nudix hydrolase 9
gene17604_CNP	2'
gene17608_NT5C3B	5'-nucleotidase
gene17616_UTP20	UTP20
gene17627_CFLAR	CASP8 and FADD like apoptosis regulator
gene17656_TSTA3	tissue specific transplantation antigen P35B
gene17661_LOC110089051	lymphocyte antigen 6E-like
gene17667_LOC110089061	lymphocyte antigen 6E-like
gene17683_LOC110089087	tumor suppressor candidate 5 homolog
gene17690_HAUS5	HAUS augmin like complex subunit 5
gene17700_GRAMD1A	GRAM domain containing 1A
gene17702_FNDC8	fibronectin type III domain containing 8
gene17716_CUNH16orf96	chromosome unknown C16orf96 homolog
gene17718_HMOX2	heme oxygenase 2
gene17721_LOC110089132	coronin-7-like
gene17725_TFAP4	transcription factor AP-4
gene17744_FAM234A	family with sequence similarity 234 member A
gene17745_TRAP1	TNF receptor associated protein 1
gene17751_ATL1	atlastin GTPase 1
gene17752_MAP4K5	mitogen-activated protein kinase kinase kinase kinase 5
gene17753_CDKL1	cyclin dependent kinase like 1
gene17757_SOS2	SOS Ras/Rho guanine nucleotide exchange factor 2
gene1776_P4HB	prolyl 4-hydroxylase subunit beta
gene17760_NEMF	nuclear export mediator factor
gene17761_KLHDC2	kelch domain containing 2
gene17768_GOLGA7B	golgin A7 family member B
gene17771_MARVELD1	MARVEL domain containing 1
gene17772_AVPI1	arginine vasopressin induced 1
gene17773_PI4K2A	phosphatidylinositol 4-kinase type 2 alpha
gene17775_HOGA1	4-hydroxy-2-oxoglutarate aldolase 1
gene17781_EXOSC1	exosome component 1
gene17796_LOC110089206	selenide
gene17799_LOC110089198	suppressor of SWI4 1 homolog
gene178_NHSL1	NHS like 1
gene1780_NPB	neuropeptide B
gene17815_FEZ1	fasciculation and elongation protein zeta 1
gene17819_LOC110089225	pappalysin-1-like
gene17827_MYBBP1A	MYB binding protein 1a
gene17834_LOC110089230	putative methyltransferase DDB_G0268948
gene17839_LOC110089239	sarcoplasmic/endoplasmic reticulum calcium ATPase 3
gene17851_UBAP1L	ubiquitin associated protein 1 like
gene17855_ANKDD1A	ankyrin repeat and death domain containing 1A
gene1787_ASPSCR1	ASPSCR1
gene17870_CAP2	CAP
gene1788_CENPX	centromere protein X
gene17881_WDR5	WD repeat domain 5
gene17885_SARDH	sarcosine dehydrogenase
gene17886_DBH	dopamine beta-hydroxylase
gene17887_FAM163B	family with sequence similarity 163 member B
gene1789_LRRC45	leucine rich repeat containing 45
gene1790_RAC3	ras-related C3 botulinum toxin substrate 3 (rho family
gene1791_DCXR	dicarbonyl and L-xylulose reductase
gene17914_LOC110089326	cholinesterase-like
gene17917_LOC110089332	cholinesterase-like
gene17932_DUSP26	dual specificity phosphatase 26
gene17944_NKAIN1	sodium/potassium transporting ATPase interacting 1
gene17947_FABP3	fatty acid binding protein 3
gene17961_DNAJC5	DnaJ heat shock protein family (Hsp40) member C5
gene17967_SAMD10	sterile alpha motif domain containing 10
gene17971_STMN3	stathmin 3
gene17983_TSPAN33	tetraspanin 33
gene17986_IRF5	interferon regulatory factor 5
gene17998_RHOT2	ras homolog family member T2
gene18014_CLUAP1	clusterin associated protein 1
gene18015_LOC110089434	uncharacterized LOC110089434
gene18030_BCL3	B-cell CLL/lymphoma 3
gene18031_CBLC	Cbl proto-oncogene C
gene18034_TOMM40	translocase of outer mitochondrial membrane 40
gene18035_LOC110089460	uncharacterized LOC110089460
gene18036_LOC110089439	uncharacterized LOC110089439
gene18037_LOC110089446	apolipoprotein A-I-like
gene1804_NME1	NME/NM23 nucleoside diphosphate kinase 1
gene18040_APOC2	apolipoprotein C2
gene18052_ADGRL4	adhesion G protein-coupled receptor L4
gene18060_RAB40C	RAB40C
gene18068_NME4	NME/NM23 nucleoside diphosphate kinase 4
gene18070_CHRNA2	cholinergic receptor nicotinic alpha 2 subunit
gene18072_EPHX2	epoxide hydrolase 2
gene18073_LOC110089492	L-gulonolactone oxidase-like
gene18101_FBXO18	F-box protein
gene18105_ASB13	ankyrin repeat and SOCS box containing 13
gene18110_COPG2	coatomer protein complex subunit gamma 2
gene18129_TTC5	tetratricopeptide repeat domain 5
gene18140_TMEM55B	transmembrane protein 55B
gene1815_SPATA20	spermatogenesis associated 20
gene18162_SCARA5	scavenger receptor class A member 5
gene18168_FAM173B	family with sequence similarity 173 member B
gene18169_SEMA5A	semaphorin 5A
gene18212_TRABD	TraB domain containing
gene18219_LOC110089645	mitogen-activated protein kinase 12-like
gene18225_LOC110089661	cholesterol 24-hydroxylase-like
gene18237_LOC110089672	beta-1
gene18238_DYRK1B	dual specificity tyrosine phosphorylation regulated kinase 1B
gene18247_SMAP2	small ArfGAP2
gene18251_TINAGL1	tubulointerstitial nephritis antigen like 1
gene18260_LOC110089712	kinesin-like protein KIF20A
gene18265_LOC110089705	transmembrane protein 68-like
gene18279_MFHAS1	malignant fibrous histiocytoma amplified sequence 1
gene1828_HAL	histidine ammonia-lyase
gene18281_LOC110089726	AT-rich interactive domain-containing protein 3A-like
gene18282_SIGMAR1	sigma non-opioid intracellular receptor 1
gene18283_GALT	galactose-1-phosphate uridylyltransferase
gene1829_AMDHD1	amidohydrolase domain containing 1
gene18290_CRIP2	cysteine rich protein 2
gene18325_LOC110089765	zinc finger protein 850-like
gene18327_LOC110089768	zinc finger protein 436-like
gene18344_EHMT1	euchromatic histone lysine methyltransferase 1
gene18348_JPT2	Jupiter microtubule associated homolog 2
gene18349_CRAMP1	cramped chromatin regulator homolog 1
gene18350_IFT140	intraflagellar transport 140
gene18351_TMEM204	transmembrane protein 204
gene18355_LOC110089818	uncharacterized LOC110089818
gene18365_THPO	thrombopoietin
gene18369_FAM131A	family with sequence similarity 131 member A
gene18370_EIF4G1	eukaryotic translation initiation factor 4 gamma 1
gene18375_PHGDH	phosphoglycerate dehydrogenase
gene18376_HMGCS2	3-hydroxy-3-methylglutaryl-CoA synthase 2
gene18384_TMCC1	transmembrane and coiled-coil domain family 1
gene18396_MORF4L1	mortality factor 4 like 1
gene18403_EXOC7	exocyst complex component 7
gene18409_TNFSF15	TNF superfamily member 15
gene18417_STXBP1	syntaxin binding protein 1
gene18418_SLC31A2	solute carrier family 31 member 2
gene18442_LOC110089901	synaptophysin-like protein 1
gene18447_LOC110089915	neuron-specific protein family member 1
gene18448_STX18	syntaxin 18
gene18449_LOC110089940	seminal plasma protein A3-like
gene18450_LOC110089918	alpha-fetoprotein-like
gene18451_LOC110089939	alpha-fetoprotein-like
gene18453_LOC110089944	alpha-fetoprotein-like
gene18490_LOC110089970	acylphosphatase-2-like
gene18495_CCS	copper chaperone for superoxide dismutase
gene18532_ITK	IL2 inducible T-cell kinase
gene18534_LOC110090008	uncharacterized LOC110090008
gene18557_LOC110090040	zinc finger and BTB domain-containing protein 18.2-like
gene18566_ACAA2	acetyl-CoA acyltransferase 2
gene18571_RNPEPL1	arginyl aminopeptidase like 1
gene18576_LOC110090058	matrix metalloproteinase-23-like
gene18593_ZNF768	zinc finger protein 768
gene18599_CCDC189	coiled-coil domain containing 189
gene18600_RNF40	ring finger protein 40
gene18608_LPCAT2	lysophosphatidylcholine acyltransferase 2
gene18609_LOC110090096	calpain small subunit 1-like
gene18613_LOC110090098	arylamine N-acetyltransferase
gene18623_TPRG1	tumor protein p63 regulated 1
gene18644_SHROOM1	shroom family member 1
gene18648_CCNI2	cyclin I family member 2
gene18657_LOC110090148	acetylserotonin O-methyltransferase-like
gene18658_LOC110090150	acetylserotonin O-methyltransferase-like
gene18672_FLOT1	flotillin 1
gene18682_SERPINH1	serpin family H member 1
gene18686_P2RY6	pyrimidinergic receptor P2Y6
gene18689_LOC110090183	uncharacterized LOC110090183
gene18697_LOC110090193	A.superbus venom factor 1-like
gene1870_RASSF9	Ras association domain family member 9
gene18703_LOC110090198	VWFA and cache domain-containing protein 1-like
gene18721_PC	pyruvate carboxylase
gene18723_CUNH11orf86	chromosome unknown C11orf86 homolog
gene18737_DECR1	2
gene18761_SEPT6	septin 6
gene18765_SLC25A5	solute carrier family 25 member 5
gene18768_PGRMC1	progesterone receptor membrane component 1
gene18787_TYMP	thymidine phosphorylase
gene18801_LOC110090296	keratin
gene18815_COPS7B	COP9 signalosome subunit 7B
gene18821_NT5M	5'
gene18832_LOC110090333	cAMP-dependent protein kinase type I-beta regulatory subunit
gene18898_LOC110090352	zinc finger protein 34-like
gene18915_LOC110090340	uncharacterized LOC110090340
gene18920_LOC110090355	uncharacterized LOC110090355
gene18930_TBL3	transducin beta like 3
gene18939_RPUSD1	RNA pseudouridylate synthase domain containing 1
gene18941_LOC110090448	pappalysin-1-like
gene18958_LOC110090469	interleukin-8-like
gene18965_LOC110090482	killer cell lectin-like receptor subfamily F member 2
gene18974_DDR1	discoidin domain receptor tyrosine kinase 1
gene18975_LOC110090489	alpha-1A adrenergic receptor-like
gene18977_LDLRAD3	low density lipoprotein receptor class A domain containing 3
gene1898_B4GALNT1	beta-1
gene18987_EEF1G	eukaryotic translation elongation factor 1 gamma
gene1900_LOC110070327	transcription factor Sp5-like
gene19006_LOC110090520	MAM domain-containing protein 2-like
gene19008_SCAMP5	secretory carrier membrane protein 5
gene19013_SCAMP2	secretory carrier membrane protein 2
gene19017_LOC110090531	zona pellucida sperm-binding protein 3-like
gene19021_ARHGEF17	Rho guanine nucleotide exchange factor 17
gene19024_GAREM2	GRB2 associated regulator of MAPK1 subtype 2
gene19025_HADHA	hydroxyacyl-CoA dehydrogenase/3-ketoacyl-CoA thiolase/enoyl-CoA hydratase (trifunctional protein)
gene19038_RASAL2	RAS protein activator like 2
gene19051_FH	fumarate hydratase
gene1906_DCTN2	dynactin subunit 2
gene19069_GATAD2A	GATA zinc finger domain containing 2A
gene19081_LOC110090610	protein FAM19A1-like
gene19084_HDAC6	histone deacetylase 6
gene19127_TK2	thymidine kinase 2
gene19129_CMTM3	CKLF like MARVEL transmembrane domain containing 3
gene1914_INHBE	inhibin beta E subunit
gene19140_RGS19	regulator of G-protein signaling 19
gene19145_SERPINA10	serpin family A member 10
gene19146_LOC110090680	alpha-1-antiproteinase 2-like
gene19147_LOC110090676	alpha-1-antitrypsin-like
gene19148_LOC110090675	alpha-1-antitrypsin-like
gene19150_LOC110090684	alpha-1-antiproteinase-like
gene19153_LOC110090698	urokinase plasminogen activator surface receptor-like
gene19160_RPS19	ribosomal protein S19
gene19182_FZD7	frizzled class receptor 7
gene19187_LOC110090724	cytochrome P450 2C18-like
gene1921_LRP1	LDL receptor related protein 1
gene19213_PCGF2	polycomb group ring finger 2
gene19214_ADCY8	adenylate cyclase 8
gene19216_LOC110090754	WASH complex subunit 5
gene19217_NSMCE2	NSE2/MMS21 homolog
gene1923_NAB2	NGFI-A binding protein 2
gene19232_RPSA	ribosomal protein SA
gene19246_GID4	GID complex subunit 4 homolog
gene19250_LLGL1	LLGL1
gene1926_SPRYD3	SPRY domain containing 3
gene19260_LOC110090790	GRB2-related adapter protein-like
gene19261_LOC110090802	phosphatidylinositol 3-kinase catalytic subunit type 3-like
gene19269_LOC110090809	zinc finger protein 496-like
gene1927_TNS2	tensin 2
gene19275_LAMP5	lysosomal associated membrane protein family member 5
gene19284_TBC1D20	TBC1 domain family member 20
gene19290_CUNH20orf96	chromosome unknown C20orf96 homolog
gene19292_HM13	histocompatibility minor 13
gene19293_PDE6D	phosphodiesterase 6D
gene19304_LOC110090845	gamma-aminobutyric acid receptor-associated protein-like 1
gene19311_LOC110090856	dimethylaniline monooxygenase [N-oxide-forming] 3-like
gene19315_TMEM26	transmembrane protein 26
gene19331_ZNF652	zinc finger protein 652
gene19335_XK	X-linked Kx blood group
gene19343_SEC22C	SEC22 homolog C
gene19349_KCNQ3	potassium voltage-gated channel subfamily Q member 3
gene19350_FRMD6	FERM domain containing 6
gene19351_GNG2	G protein subunit gamma 2
gene19358_LOC110090904	uncharacterized LOC110090904
gene19387_FTCD	formimidoyltransferase cyclodeaminase
gene19408_LOC110090958	sperm acrosome membrane-associated protein 4-like
gene19418_ADCK5	aarF domain containing kinase 5
gene19427_LOC110090973	ras-related protein Rab-14-like
gene1944_RAPGEF3	Rap guanine nucleotide exchange factor 3
gene19447_ARL9	ADP ribosylation factor like GTPase 9
gene1945_SLC48A1	solute carrier family 48 member 1
gene19450_FAAP20	Fanconi anemia core complex associated protein 20
gene19458_CUNH14orf105	chromosome unknown C14orf105 homolog
gene19461_CEP72	centrosomal protein 72
gene19466_LOC110091020	protein tyrosine phosphatase type IVA 3
gene1947_HDAC7	histone deacetylase 7
gene19470_B3GALT4	beta-1
gene19473_LOC110091024	heme-binding protein 2-like
gene19477_PHF1	PHD finger protein 1
gene19478_SYNGAP1	synaptic Ras GTPase activating protein 1
gene19479_ZBTB9	zinc finger and BTB domain containing 9
gene19488_TOGARAM1	TOG array regulator of axonemal microtubules 1
gene19491_LOC110091038	cytochrome P450 2H1-like
gene19543_VSTM2B	V-set and transmembrane domain containing 2B
gene19549_LOC110091109	EH domain-containing protein 1-like
gene19551_SCYL1	SCY1 like pseudokinase 1
gene19553_PDGFD	platelet derived growth factor D
gene19555_LOC110091117	helix-loop-helix protein 2-like
gene19564_NPEPL1	aminopeptidase-like 1
gene19573_LOC110091135	class II histocompatibility antigen
gene19577_SLC39A7	solute carrier family 39 member 7
gene19586_HGFAC	HGF activator
gene19603_LRRTM1	leucine rich repeat transmembrane neuronal 1
gene19609_LOC110091172	zinc finger protein 883-like
gene19616_LOC110091178	zinc finger protein 83-like
gene19619_MGAT1	mannosyl (alpha-1
gene19628_LOC110091184	zinc finger protein 271-like
gene19629_LOC110091185	uncharacterized LOC110091185
gene19631_ST8SIA1	ST8 alpha-N-acetyl-neuraminide alpha-2
gene19637_LOC110091204	phospholipid scramblase 1-like
gene1964_FBXL12	F-box and leucine rich repeat protein 12
gene19644_FAM167A	family with sequence similarity 167 member A
gene1965_LOC110071540	hepatic lectin-like
gene19656_LMNA	lamin A/C
gene19657_SEMA4A	semaphorin 4A
gene1966_LOC110071550	hepatic lectin-like
gene19667_LOC110091240	CMRF35-like molecule 6
gene19668_HEATR9	HEAT repeat containing 9
gene1969_LOC110071748	LIM homeobox transcription factor 1-alpha-like
gene19690_MED17	mediator complex subunit 17
gene19695_CMTR2	cap methyltransferase 2
gene19704_LOC110091288	homeobox protein PKNOX1-like
gene19717_NOV	nephroblastoma overexpressed
gene19718_MAL2	mal
gene19727_LOC110091302	tubulin beta-4B chain-like
gene19730_NMNAT2	nicotinamide nucleotide adenylyltransferase 2
gene19736_LOC110091312	very long-chain acyl-CoA synthetase-like
gene1975_LPAR2	lysophosphatidic acid receptor 2
gene19751_LOC110091334	zinc finger protein 397-like
gene19774_LOC110091362	17-beta-hydroxysteroid dehydrogenase type 6-like
gene19780_GPR182	G protein-coupled receptor 182
gene19784_ARHGDIB	Rho GDP dissociation inhibitor beta
gene19790_WDR91	WD repeat domain 91
gene19807_TNK2	tyrosine kinase non receptor 2
gene19811_LOC110091403	Bloom syndrome protein-like
gene19815_ZYX	zyxin
gene19817_LOC110091408	asparagine--tRNA ligase
gene1982_COLGALT1	collagen beta(1-O)galactosyltransferase 1
gene19835_DAP	death associated protein
gene19860_SEMA4B	semaphorin 4B
gene19861_CIB1	calcium and integrin binding 1
gene19865_VPS33B	VPS33B
gene19885_APOB	apolipoprotein B
gene19893_LOC110091498	alcohol dehydrogenase 1B-like
gene19895_LOC110091497	alcohol dehydrogenase 1A
gene19949_FOXK1	forkhead box K1
gene19951_LOC110091551	cytochrome P450 3A1-like
gene19958_LOC110091560	HLA class II histocompatibility antigen
gene19961_LOC110091564	HLA class II histocompatibility antigen
gene19962_LOC110091563	H-2 class II histocompatibility antigen
gene19965_LOC110091574	5-beta-cholestane-3-alpha
gene19994_LOC110091599	endothelin-converting enzyme 2-like
gene19995_LOC110091602	mitochondrial ubiquitin ligase activator of nfkb 1-A-like
gene19996_CAMK2N2	calcium/calmodulin dependent protein kinase II inhibitor 2
gene19997_LOC110091603	methyltransferase-like protein 13
gene2000_SLC2A10	solute carrier family 2 member 10
gene20018_BCL6	B-cell CLL/lymphoma 6
gene20024_LOC110091634	uncharacterized LOC110091634
gene20030_LOC110091630	C-type lectin domain family 2 member D-like
gene20058_SBK1	SH3 domain binding kinase 1
gene20071_WDR92	WD repeat domain 92
gene20074_CNRIP1	cannabinoid receptor interacting protein 1
gene20089_ATG14	autophagy related 14
gene2009_STAU1	staufen double-stranded RNA binding protein 1
gene20095_LOC110091705	complement factor H-related protein 1-like
gene20099_LOC110091710	complement factor H-related protein 2-like
gene20100_F13B	coagulation factor XIII B chain
gene20109_LOC110091720	E3 ubiquitin-protein ligase RNF182-like
gene2012_LOC110071821	somatomedin-B and thrombospondin type-1 domain-containing protein-like
gene20133_LOC110091743	zinc finger protein 501-like
gene20137_ZNF395	zinc finger protein 395
gene2014_PTGIS	prostaglandin I2 synthase
gene20151_LOC110091763	phosphomethylethanolamine N-methyltransferase-like
gene20152_LOC110091757	phosphoethanolamine N-methyltransferase 3-like
gene20166_CUNH19orf12	chromosome unknown C19orf12 homolog
gene20167_LOC110069791	uncharacterized protein F13E9.13
gene20173_LOC110069801	actin-related protein 2-B-like
gene20177_BBS1	Bardet-Biedl syndrome 1
gene20184_STMN4	stathmin 4
gene20190_PEX13	peroxisomal biogenesis factor 13
gene20194_LOC110069824	zinc finger protein OZF-like
gene20209_LOC110069828	zinc finger protein 239-like
gene20210_LOC110069829	zinc finger protein 397-like
gene20213_LOC110069831	zinc finger protein 501-like
gene20219_LOC110069846	nidogen-2-like
gene20220_LOC110069847	prostaglandin E2 receptor EP2 subtype-like
gene20239_LOC110069870	kininogen-1-like
gene20246_LOC110069877	C-type lectin domain family 2 member B-like
gene2025_CEBPB	CCAAT/enhancer binding protein beta
gene20250_LOC110069885	zinc finger protein 239-like
gene20255_LOC110069882	zinc finger protein 85-like
gene20270_LOC110069896	solute carrier family 22 member 6-A-like
gene20272_LOC110069895	solute carrier family 22 member 6-A-like
gene20273_LOC110069902	solute carrier family 22 member 6-B-like
gene203_TCF21	transcription factor 21
gene20305_CASTOR1	cytosolic arginine sensor for mTORC1 subunit 1
gene20309_LOC110069949	zinc finger protein 420-like
gene20330_LOC110069952	protein ANTAGONIST OF LIKE HETEROCHROMATIN PROTEIN 1-like
gene20336_LOC110069973	gastrula zinc finger protein XlCGF71.1-like
gene20354_SETD2	SET domain containing 2
gene20371_LOC110069994	uncharacterized LOC110069994
gene20376_PI4KA	phosphatidylinositol 4-kinase alpha
gene20377_SERPIND1	serpin family D member 1
gene20385_ETAA1	ETAA1
gene20410_CD248	CD248 molecule
gene20418_TOPORS	TOP1 binding arginine/serine rich protein
gene20424_LOC110070062	sulfotransferase 1C1-like
gene20432_LOC110070071	zinc finger protein 260-like
gene20437_LOC110070073	carnitine O-acetyltransferase-like
gene20457_LOC110070094	bifunctional UDP-N-acetylglucosamine 2-epimerase/N-acetylmannosamine kinase-like
gene20476_LOC110070109	uncharacterized LOC110070109
gene20478_MSRA	methionine sulfoxide reductase A
gene2049_LOC110071835	glycerol-3-phosphate dehydrogenase 1-like protein
gene20504_LOC110070151	glutathione S-transferase kappa 1-like
gene20512_LOC110070152	inactive carboxypeptidase-like protein X2
gene20556_ACER3	alkaline ceramidase 3
gene20559_EXTL3	exostosin like glycosyltransferase 3
gene2056_CEP70	centrosomal protein 70
gene2057_ESYT3	extended synaptotagmin 3
gene20581_HAMP	hepcidin antimicrobial peptide
gene20582_LOC110070229	myelin-associated glycoprotein-like
gene20591_LOC110070234	class I histocompatibility antigen
gene20593_NEFM	neurofilament medium
gene20594_NEFL	neurofilament light
gene20597_PCDH20	protocadherin 20
gene20612_LOC110070260	cytosolic phospholipase A2 gamma-like
gene20618_LOC110070271	zinc finger protein 11-like
gene20624_MIOX	myo-inositol oxygenase
gene20626_LOC110070277	hematopoietic lineage cell-specific protein-like
gene20629_LOC110070279	zinc finger and SCAN domain-containing protein 2-like
gene20630_LOC110070280	uncharacterized LOC110070280
gene20642_ACBD7	acyl-CoA binding domain containing 7
gene20643_RPP38	ribonuclease P/MRP subunit p38
gene20650_DEGS2	delta 4-desaturase
gene20660_LOC110070316	erlin-1-like
gene20661_LOC110070317	gamma-tubulin complex component 2-like
gene20665_PCYT1A	phosphate cytidylyltransferase 1
gene20683_PALMD	palmdelphin
gene20685_LOC110070342	gallinacin-10-like
gene20690_DLD	dihydrolipoamide dehydrogenase
gene20710_LOC110070372	zinc finger protein 271-like
gene20716_CHST15	carbohydrate sulfotransferase 15
gene20727_ARC	activity regulated cytoskeleton associated protein
gene20748_LOC110070406	zinc finger protein 391-like
gene2075_ACTR3	ARP3 actin related protein 3 homolog
gene20777_LOC110070440	cytochrome P450 2C8-like
gene20778_LOC110070438	cytochrome P450 2C18-like
gene20779_LOC110070439	cytochrome P450 2C19-like
gene2078_LYPD1	LY6/PLAUR domain containing 1
gene20810_SFMBT2	Scm-like with four mbt domains 2
gene20819_ANKS3	ankyrin repeat and sterile alpha motif domain containing 3
gene20863_RAB6A	RAB6A
gene20871_LOC110070538	eukaryotic translation initiation factor 4 gamma 1-like
gene20873_LOC110070541	cytochrome P450 2H1-like
gene20885_ARHGAP19	Rho GTPase activating protein 19
gene20899_LOC110070570	nucleoside diphosphate kinase 6-like
gene209_LOC110071965	pantetheinase-like
gene2091_DARS	aspartyl-tRNA synthetase
gene20913_LOC110070583	guanylate cyclase soluble subunit beta-2-like
gene20921_NARS	asparaginyl-tRNA synthetase
gene20941_LOC110070612	C-reactive protein-like
gene20942_LOC110070613	serum amyloid P-component-like
gene20952_LOC110070623	microtubule-associated proteins 1A/1B light chain 3A
gene20959_LOC110070630	major histocompatibility complex class I-related gene protein-like
gene20963_PAAF1	proteasomal ATPase associated factor 1
gene20964_DNAJB13	DnaJ heat shock protein family (Hsp40) member B13
gene20965_UCP2	uncoupling protein 2
gene20980_LOC110070651	store-operated calcium entry regulator STIMATE-like
gene20996_LRR1	leucine rich repeat protein 1
gene20999_POLE2	DNA polymerase epsilon 2
gene21003_NFKBIL1	NFKB inhibitor like 1
gene21006_LOC110070676	galectin-1-like
gene21018_LOC110070692	cytochrome P450 2K1-like
gene21019_LOC110070691	cytochrome P450 2K4-like
gene21029_GLB1	galactosidase beta 1
gene2103_GTPBP4	GTP binding protein 4
gene21032_SLC35F6	solute carrier family 35 member F6
gene21037_LOC110070713	tigger transposable element-derived protein 1-like
gene21045_LOC110070719	exosome complex component RRP43-like
gene2105_DIP2C	disco interacting protein 2 homolog C
gene21052_LOC110070723	zinc finger protein 239-like
gene21053_HPN	hepsin
gene21056_LOC110070731	zinc finger protein 239-like
gene21072_LOC110070748	T-complex protein 1 subunit zeta-like
gene21077_LOC110070753	gastrula zinc finger protein XlCGF57.1-like
gene21090_LOC110070766	zinc finger protein 213-like
gene21102_LOC110070780	uncharacterized LOC110070780
gene21106_LOC110070786	acetylserotonin O-methyltransferase-like
gene21107_LOC110070785	acetylserotonin O-methyltransferase-like
gene21110_LOC110070787	gastrula zinc finger protein XlCGF57.1-like
gene21112_LOC110070792	uncharacterized LOC110070792
gene21119_TMEM74B	transmembrane protein 74B
gene21125_TECR	trans-2
gene21127_LOC110070806	zinc finger protein 883-like
gene21128_LOC110070808	lysozyme C
gene21133_LOC110070812	zinc finger protein 850-like
gene21149_FAM110D	family with sequence similarity 110 member D
gene21170_LOC110070854	class I histocompatibility antigen
gene21171_LOC110070857	H-2 class I histocompatibility antigen
gene21186_FAM131B	family with sequence similarity 131 member B
gene21198_LOC110070885	acyl-CoA dehydrogenase family member 11-like
gene21201_LOC110070887	acyl-CoA dehydrogenase family member 11-like
gene21216_TMEM255A	transmembrane protein 255A
gene21223_LOC110070912	DNA polymerase epsilon catalytic subunit A-like
gene21273_LOC110070967	gastrula zinc finger protein XlCGF8.2DB-like
gene21289_LOC110070982	alpha-tectorin-like
gene213_STX7	syntaxin 7
gene21300_LOC110070995	oocyte zinc finger protein XlCOF6-like
gene21303_LOC110070998	carnitine O-acetyltransferase-like
gene21370_LOC110071070	zinc finger and SCAN domain-containing protein 31-like
gene2138_WDR86	WD repeat domain 86
gene21380_LOC110071081	membrane-spanning 4-domains subfamily A member 4A-like
gene21381_LOC110071080	sushi
gene21393_FLCN	folliculin
gene21407_LOC110071111	cytochrome P450 2K1-like
gene21411_LOC110071115	H-2 class I histocompatibility antigen
gene21421_LOC110071126	inter-alpha-trypsin inhibitor heavy chain H2-like
gene21446_LOC110071152	zinc finger and SCAN domain-containing protein 31-like
gene21449_LOC110071155	zinc finger protein 558-like
gene21459_LOC110071164	class I histocompatibility antigen
gene21460_TBC1D10A	TBC1 domain family member 10A
gene21481_LOC110071187	liver carboxylesterase 1-like
gene21488_LOC110071195	mucin-5AC-like
gene21495_LOC110071202	presequence protease
gene21511_LOC110071220	autophagy-related protein 2 homolog A-like
gene21530_LOC110071240	periplasmic beta-glucosidase-like
gene21553_LOC110071267	zinc finger protein RFP-like
gene2156_DUSP5	dual specificity phosphatase 5
gene21594_LOC110071310	apolipoprotein A-IV-like
gene21595_LOC110071309	uncharacterized LOC110071309
gene21597_LOC110071312	ras-like protein family member 10B
gene2161_BBIP1	BBSome interacting protein 1
gene21618_LOC110071334	neutral alpha-glucosidase AB-like
gene21628_LOC110071345	valine--tRNA ligase
gene21641_LOC110071359	zinc finger and SCAN domain-containing protein 23-like
gene21672_LOC110071390	kinectin-like
gene21676_LOC110071394	alpha-1-antiproteinase-like
gene21681_LOC110071400	calpain-10-like
gene21685_LOC110071404	L-serine dehydratase/L-threonine deaminase-like
gene21687_LOC110071406	protein C19orf12 homolog
gene21691_LOC110071411	DNA polymerase epsilon subunit 2-like
gene21694_LOC110071414	N-terminal kinase-like protein
gene21695_LOC110071415	zinc finger protein 91-like
gene21703_LOC110071426	zinc finger protein 202-like
gene2171_HABP2	hyaluronan binding protein 2
gene21725_LOC110071450	exosome complex component RRP45B-like
gene2173_CASP7	caspase 7
gene21731_LOC110071457	carbonyl reductase [NADPH] 1-like
gene21733_LOC110071460	epoxide hydrolase 1-like
gene21738_LOC110071465	72 kDa type IV collagenase-like
gene21741_LOC110071468	zinc finger protein 470-like
gene21746_LOC110071473	zinc finger and SCAN domain-containing protein 23-like
gene21762_LOC110071490	hemicentin-1-like
gene21764_LOC110071493	glutamate carboxypeptidase 2-like
gene21770_LOC110071500	zinc finger protein 239-like
gene21772_LOC110071502	major histocompatibility complex class I-related gene protein-like
gene21788_LOC110071519	zinc finger protein 397-like
gene21818_LOC110071552	atlastin-1-like
gene21820_LOC110071554	zinc finger and SCAN domain-containing protein 21-like
gene21825_LOC110071559	helicase SKI2W-like
gene21832_LOC110071566	cytochrome P450 2C31-like
gene21840_LOC110071575	protein regulator of cytokinesis 1-like
gene21853_LOC110071589	40S ribosomal protein S9-like
gene21857_LOC110071594	zinc finger protein 2 homolog
gene21864_LOC110071602	serine/threonine-protein kinase pim-3-like
gene21870_LOC110071608	serine protease 23-like
gene21921_LOC110071662	stress-induced-phosphoprotein 1-like
gene21938_LOC110071679	angiomotin-like protein 1
gene21951_LOC110071693	cornifelin homolog
gene21954_LOC110071696	phosphatidylinositol 4
gene21958_LOC110071700	fatty-acid amide hydrolase 1-like
gene21959_LOC110071701	zinc finger protein 239-like
gene21972_CUNH14orf119	chromosome unknown C14orf119 homolog
gene222_LOC110073146	vitelline membrane outer layer protein 1 homolog
gene2248_PAX8	paired box 8
gene2249_PSD4	pleckstrin and Sec7 domain containing 4
gene2252_DDX56	DEAD-box helicase 56
gene2260_GFRA2	GDNF family receptor alpha 2
gene2272_TMEM150A	transmembrane protein 150A
gene2278_UFM1	ubiquitin fold modifier 1
gene2295_LOC110072209	low molecular weight neuronal intermediate filament-like
gene2301_FAM136A	family with sequence similarity 136 member A
gene2304_TSR1	TSR1
gene2310_ANTXR1	anthrax toxin receptor 1
gene2325_KCNIP3	potassium voltage-gated channel interacting protein 3
gene233_CHN2	chimerin 2
gene2348_LOC110072134	metal transporter CNNM3-like
gene2354_ACTR1B	ARP1 actin-related protein 1 homolog B
gene2355_LOC110072140	E3 ubiquitin-protein ligase MARCH5-like
gene2356_LOC110072141	neuropeptide Y receptor type 4-like
gene2358_LOC110072143	heparan sulfate glucosamine 3-O-sulfotransferase 1-like
gene2362_MAT2A	methionine adenosyltransferase 2A
gene2365_PLAT	plasminogen activator
gene2371_GPAT4	glycerol-3-phosphate acyltransferase 4
gene2373_GINS4	GINS complex subunit 4
gene2378_IDO2	indoleamine 2
gene238_JAZF1	JAZF zinc finger 1
gene2383_HTRA4	HtrA serine peptidase 4
gene2386_LOC110072163	pleckstrin homology domain-containing family A member 2-like
gene2393_POLR3D	RNA polymerase III subunit D
gene2394_LOC110072171	ATPase family AAA domain-containing protein 1-A-like
gene2398_SORBS3	sorbin and SH3 domain containing 3
gene2401_CCAR2	cell cycle and apoptosis regulator 2
gene2409_R3HCC1	R3H domain and coiled-coil containing 1
gene2444_PCYOX1L	prenylcysteine oxidase 1 like
gene2473_SLIT3	slit guidance ligand 3
gene2515_CTTNBP2NL	CTTNBP2 N-terminal like
gene2568_GPR1	G protein-coupled receptor 1
gene2569_EEF1B2	eukaryotic translation elongation factor 1 beta 2
gene2573_NRP2	neuropilin 2
gene2586_ADAMTS10	ADAM metallopeptidase with thrombospondin type 1 motif 10
gene2594_LOC110072437	histone-lysine N-methyltransferase
gene2596_IZUMO4	IZUMO family member 4
gene2599_BTBD2	BTB domain containing 2
gene2604_MBD3	methyl-CpG binding domain protein 3
gene2613_CREB3L3	cAMP responsive element binding protein 3 like 3
gene2616_LOC110072651	forkhead box protein D4-like
gene2618_EEF2	eukaryotic translation elongation factor 2
gene2619_DAPK3	death associated protein kinase 3
gene2620_LOC110072652	protein-lysine 6-oxidase-like
gene2624_LOC110072479	receptor expression-enhancing protein 6-like
gene2630_TIMM44	translocase of inner mitochondrial membrane 44
gene2632_MARCH2	membrane associated ring-CH-type finger 2
gene2635_LOC110072475	acidic leucine-rich nuclear phosphoprotein 32 family member B-like
gene2637_PRR22	proline rich 22
gene2654_POLE4	DNA polymerase epsilon 4
gene2655_LOC110072493	excitatory amino acid transporter 5-like
gene2656_LOC110072496	C-C motif chemokine 5-like
gene2659_ANKLE1	ankyrin repeat and LEM domain containing 1
gene266_NPY	neuropeptide Y
gene2678_LOC110072510	guanine nucleotide-binding protein G(I)/G(S)/G(O) subunit gamma-7
gene268_FAM221A	family with sequence similarity 221 member A
gene2680_DIRAS1	DIRAS family GTPase 1
gene2691_GAMT	guanidinoacetate N-methyltransferase
gene2697_APBA3	amyloid beta precursor protein binding family A member 3
gene2702_FSTL3	follistatin like 3
gene2728_AP1M1	adaptor related protein complex 1 mu 1 subunit
gene2748_MAST3	microtubule associated serine/threonine kinase 3
gene2753_INSR	insulin receptor
gene2756_LONP1	lon peptidase 1
gene2765_MYO9B	myosin IXB
gene2767_MPV17L2	MPV17 mitochondrial inner membrane protein like 2
gene2773_PGPEP1	pyroglutamyl-peptidase I
gene2776_SSBP4	single stranded DNA binding protein 4
gene2785_LOC110072591	cortactin-binding protein 2-like
gene2798_RNF126	ring finger protein 126
gene2817_CASP9	caspase 9
gene2824_UBXN10	UBX domain protein 10
gene2826_VWA5B1	von Willebrand factor A domain containing 5B1
gene2845_LRRC47	leucine rich repeat containing 47
gene2846_CEP104	centrosomal protein 104
gene2868_FBXL7	F-box and leucine rich repeat protein 7
gene2895_TLR2	toll like receptor 2
gene2899_FGB	fibrinogen beta chain
gene2900_FGA	fibrinogen alpha chain
gene2901_FGG	fibrinogen gamma chain
gene2903_LRAT	lecithin retinol acyltransferase (phosphatidylcholine--retinol O-acyltransferase)
gene2913_TDO2	tryptophan 2
gene2922_ETFDH	electron transfer flavoprotein dehydrogenase
gene2950_ANXA5	annexin A5
gene3003_NRSN1	neurensin 1
gene3004_DCDC2	doublecortin domain containing 2
gene3005_MRS2	MRS2
gene3007_ALDH5A1	aldehyde dehydrogenase 5 family member A1
gene3010_ACOT13	acyl-CoA thioesterase 13
gene3011_CUNH6orf62	chromosome unknown C6orf62 homolog
gene3023_LOC110072908	probable 2-ketogluconate reductase
gene3028_KCNG2	potassium voltage-gated channel modifier subfamily G member 2
gene3035_GALR1	galanin receptor 1
gene3041_FAH	fumarylacetoacetate hydrolase
gene3043_BCL2A1	BCL2 related protein A1
gene3049_LOC110072952	ras-related and estrogen-regulated growth inhibitor-like protein
gene3050_KIF7	kinesin family member 7
gene3051_TICRR	TOPBP1 interacting checkpoint and replication regulator
gene3060_HAPLN3	hyaluronan and proteoglycan link protein 3
gene3069_KLHL25	kelch like family member 25
gene3072_PLEKHO2	pleckstrin homology domain containing O2
gene3105_HMGCLL1	3-hydroxymethyl-3-methylglutaryl-CoA lyase like 1
gene3134_AGTR1	angiotensin II receptor type 1
gene3142_CP	ceruloplasmin
gene3197_ANO7L1	anoctamin 7 like 1
gene3207_SPEN	spen family transcriptional repressor
gene3210_TMEM82	transmembrane protein 82
gene3211_SLC25A34	solute carrier family 25 member 34
gene3216_HP1BP3	heterochromatin protein 1 binding protein 3
gene3217_EIF4G3	eukaryotic translation initiation factor 4 gamma 3
gene3222_USP48	ubiquitin specific peptidase 48
gene3232_LOC110073196	protein-arginine deiminase type-1-like
gene3238_KLHDC7A	kelch domain containing 7A
gene3241_ALDH4A1	aldehyde dehydrogenase 4 family member A1
gene3242_IFFO2	intermediate filament family orphan 2
gene3246_LOC110073204	aflatoxin B1 aldehyde reductase member 2-like
gene3247_LOC110073109	aflatoxin B1 aldehyde reductase member 2-like
gene3259_MFN2	mitofusin 2
gene3267_CUNH1orf167	chromosome unknown C1orf167 homolog
gene3269_DRAXIN	dorsal inhibitory axon guidance protein
gene3272_LOC110073220	F-box only protein 44-like
gene3281_SRM	spermidine synthase
gene3285_LOC110073234	somatostatin-2-like
gene33_KLHL32	kelch like family member 32
gene3301_CLSTN1	calsyntenin 1
gene3307_H6PD	hexose-6-phosphate dehydrogenase/glucose 1-dehydrogenase
gene3317_SAMD11	sterile alpha motif domain containing 11
gene3318_NOC2L	NOC2 like nucleolar associated transcriptional repressor
gene3320_PLEKHN1	pleckstrin homology domain containing N1
gene3321_PERM1	PPARGC1 and ESRR induced regulator
gene3336_B3GALT6	beta-1
gene3337_C1QTNF12	C1q and TNF related 12
gene3340_ACAP3	ArfGAP with coiled-coil
gene3347_DVL1	dishevelled segment polarity protein 1
gene3353_ANKRD65	ankyrin repeat domain 65
gene3358_ATAD3A	ATPase family
gene3364_LOC110073301	Golgi integral membrane protein 4-like
gene3369_LOC110073305	solute carrier family 35 member E2-like
gene3371_NADK	NAD kinase
gene3388_ACSS2	acyl-CoA synthetase short-chain family member 2
gene3390_TLDC2	TBC/LysM-associated domain containing 2
gene3422_SHISA4	shisa family member 4
gene3431_LOC110073404	adenosine receptor A1-like
gene3445_RNPEP	arginyl aminopeptidase
gene3449_CSRP1	cysteine and glycine rich protein 1
gene3450_PHLDA3	pleckstrin homology like domain family A member 3
gene3456_IGFN1	immunoglobulin-like and fibronectin type III domain containing 1
gene3458_TMEM9	transmembrane protein 9
gene3468_ADI1	acireductone dioxygenase 1
gene3495_SLC25A48	solute carrier family 25 member 48
gene3504_KLHL3	kelch like family member 3
gene3551_PDHX	pyruvate dehydrogenase complex component X
gene3552_APIP	APAF1 interacting protein
gene3556_CAT	catalase
gene3568_CTTN	cortactin
gene359_LOC110073583	transmembrane protein 198-like
gene36_FHL5	four and a half LIM domains 5
gene3600_RBP4	retinol binding protein 4
gene3603_MYOF	myoferlin
gene3607_HHEX	hematopoietically expressed homeobox
gene3620_FREM1	FRAS1 related extracellular matrix 1
gene3668_IL15	interleukin 15
gene368_LMBR1L	limb development membrane protein 1 like
gene3696_PCBD1	pterin-4 alpha-carbinolamine dehydratase 1
gene3699_LOC110073674	microsomal triglyceride transfer protein large subunit-like
gene370_LOC110073662	tubulin alpha-1A chain
gene3703_EIF4EBP2	eukaryotic translation initiation factor 4E binding protein 2
gene3705_LRRC20	leucine rich repeat containing 20
gene3714_DNAJB12	DnaJ heat shock protein family (Hsp40) member B12
gene3715_MICU1	mitochondrial calcium uptake 1
gene3722_FAM149B1	family with sequence similarity 149 member B1
gene3732_PIF1	PIF1 5'-to-3' DNA helicase
gene3733_FAM183A	family with sequence similarity 183 member A
gene3734_EBNA1BP2	EBNA1 binding protein 2
gene3748_ST3GAL3	ST3 beta-galactoside alpha-2
gene375_C1QL4	complement C1q like 4
gene3761_ERI3	ERI1 exoribonuclease family member 3
gene3785_BTBD19	BTB domain containing 19
gene3793_LOC110073776	riboflavin-binding protein-like
gene3803_LOC110073786	cytochrome b-c1 complex subunit 6
gene3806_ZNF706	zinc finger protein 706
gene382_RDH5	retinol dehydrogenase 5
gene3821_CTHRC1	collagen triple helix repeat containing 1
gene3826_DPYS	dihydropyrimidinase
gene3840_TRHR	thyrotropin releasing hormone receptor
gene3850_TBC1D4	TBC1 domain family member 4
gene3876_SOX21	SRY-box 21
gene3882_ESM1	endothelial cell specific molecule 1
gene3887_ARL15	ADP ribosylation factor like GTPase 15
gene3890_LOC110073885	uncharacterized LOC110073885
gene3913_SELENOP	selenoprotein P
gene3915_GHR	growth hormone receptor
gene3919_OXCT1	3-oxoacid CoA-transferase 1
gene392_CRLF3	cytokine receptor like factor 3
gene3928_DEPDC1B	DEP domain containing 1B
gene3949_TRAPPC13	trafficking protein particle complex 13
gene3970_BHMT	betaine--homocysteine S-methyltransferase
gene4001_MAB21L1	mab-21 like 1
gene4009_RFXAP	regulatory factor X associated protein
gene4015_ARHGAP31	Rho GTPase activating protein 31
gene4019_IGSF11	immunoglobulin superfamily member 11
gene403_DGKE	diacylglycerol kinase epsilon
gene4045_LOC110074057	amine oxidase [flavin-containing] A-like
gene4049_FUNDC1	FUN14 domain containing 1
gene4057_PWP2	PWP2 periodic tryptophan protein homolog (yeast)
gene4070_WDR4	WD repeat domain 4
gene4082_PROZ	protein Z
gene409_TMEM100	transmembrane protein 100
gene410_MMD	monocyte to macrophage differentiation associated
gene4104_EDAR	ectodysplasin A receptor
gene4107_LIMS1	LIM zinc finger domain containing 1
gene4119_GPR45	G protein-coupled receptor 45
gene412_STXBP4	syntaxin binding protein 4
gene4135_B4GALNT4	beta-1
gene4154_LRP5	LDL receptor related protein 5
gene4162_HRAS	HRas proto-oncogene
gene4168_CDHR5	cadherin related family member 5
gene4177_PIDD1	p53-induced death domain protein 1
gene4192_KYNU	kynureninase
gene4205_RHOB	ras homolog family member B
gene421_LOC110074168	methyltransferase-like protein 7A
gene4214_OSR1	odd-skipped related transciption factor 1
gene4217_LOC110074259	retinol dehydrogenase 14
gene4238_RAB39B	RAB39B
gene4239_VBP1	VHL binding protein 1
gene4257_PAK3	p21 (RAC1) activated kinase 3
gene4259_DCX	doublecortin
gene427_ATF1	activating transcription factor 1
gene4276_AMER1	APC membrane recruitment protein 1
gene4287_LOC110074356	ubiquitin carboxyl-terminal hydrolase 12-like
gene4299_MAGT1	magnesium transporter 1
gene4304_AMOT	angiomotin
gene4307_HEPH	hephaestin
gene4308_LOC110074335	heat shock factor protein 3-like
gene4309_VSIG4	V-set and immunoglobulin domain containing 4
gene4311_LOC110074343	adrenodoxin-like
gene4314_LOC110074341	potassium voltage-gated channel subfamily C member 1-like
gene4320_YIPF6	Yip1 domain family member 6
gene4321_STARD8	StAR related lipid transfer domain containing 8
gene4325_FAM155B	family with sequence similarity 155 member B
gene4327_IGBP1	immunoglobulin binding protein 1
gene4328_LOC110074308	diacylglycerol O-acyltransferase 2-like
gene4334_GPR84	G protein-coupled receptor 84
gene434_GPD1	glycerol-3-phosphate dehydrogenase 1
gene4363_TARBP2	TARBP2
gene4364_LOC110074407	pleckstrin homology domain-containing family A member 3-like
gene4366_PCBP2	poly(rC) binding protein 2
gene4376_TMEM106C	transmembrane protein 106C
gene438_LOC110074375	uncharacterized protein C594.04c-like
gene4382_LOC110074451	25-hydroxyvitamin D-1 alpha hydroxylase
gene4383_METTL1	methyltransferase like 1
gene4386_AVIL	advillin
gene4387_CTDSP2	CTD small phosphatase 2
gene440_LOC110074385	aquaporin-6-like
gene4409_SLC25A24	solute carrier family 25 member 24
gene4424_NR5A2	nuclear receptor subfamily 5 group A member 2
gene4453_CIB2	calcium and integrin binding family member 2
gene4457_THSD4	thrombospondin type 1 domain containing 4
gene4460_LARP6	La ribonucleoprotein domain family member 6
gene4462_ADAL	adenosine deaminase like
gene4465_TJP1	tight junction protein 1
gene4482_ANXA2	annexin A2
gene449_ACVR1B	activin A receptor type 1B
gene4499_TBC1D2B	TBC1 domain family member 2B
gene4501_MYO1E	myosin IE
gene4506_ADAM10	ADAM metallopeptidase domain 10
gene4507_LIPC	lipase C
gene4513_TCF12	transcription factor 12
gene4523_PYGO1	pygopus family PHD finger 1
gene4527_PIGB	phosphatidylinositol glycan anchor biosynthesis class B
gene4535_NXPE3	neurexophilin and PC-esterase domain family member 3
gene4547_TMEM45A	transmembrane protein 45A
gene4552_CMSS1	cms1 ribosomal small subunit homolog (yeast)
gene4563_GPR161	G protein-coupled receptor 161
gene4576_F5	coagulation factor V
gene4592_MOCS1	molybdenum cofactor synthesis 1
gene4603_GLO1	glyoxalase I
gene461_APOF	apolipoprotein F
gene4615_TMEM151B	transmembrane protein 151B
gene4617_SLC35B2	solute carrier family 35 member B2
gene4622_CAPN11	calpain 11
gene4637_STEAP2	STEAP2 metalloreductase
gene4674_ASB4	ankyrin repeat and SOCS box containing 4
gene4687_RBM12B	RNA binding motif protein 12B
gene469_CS	citrate synthase
gene4691_GEM	GTP binding protein overexpressed in skeletal muscle
gene4696_ESRP1	epithelial splicing regulatory protein 1
gene4706_CUNH8orf37	chromosome unknown C8orf37 homolog
gene4708_GDF6	growth differentiation factor 6
gene471_NABP2	nucleic acid binding protein 2
gene4716_LAPTM4B	lysosomal protein transmembrane 4 beta
gene4747_NRIP1	nuclear receptor interacting protein 1
gene4753_ROBO2	roundabout guidance receptor 2
gene4756_KRT222	keratin 222
gene4758_LOC110074871	keratin
gene4774_LOC110074882	keratin
gene4777_P3H4	prolyl 3-hydroxylase family member 4 (non-enzymatic)
gene478_ESYT1	extended synaptotagmin 1
gene4788_LOC110074894	acid-sensing ion channel 2
gene479_INPP1	inositol polyphosphate-1-phosphatase
gene4792_STAT3	signal transducer and activator of transcription 3
gene4800_COASY	Coenzyme A synthase
gene4807_ARHGAP23	Rho GTPase activating protein 23
gene4811_NPEPPS	aminopeptidase puromycin sensitive
gene4814_TBKBP1	TBK1 binding protein 1
gene4823_SP2	Sp2 transcription factor
gene483_WNT10B	Wnt family member 10B
gene4849_TTC39C	tetratricopeptide repeat domain 39C
gene4961_CUNH17orf62	chromosome unknown C17orf62 homolog
gene502_PRIM1	primase (DNA) subunit 1
gene503_LOC110075158	retinol dehydrogenase 16-like
gene504_GALNT2	polypeptide N-acetylgalactosaminyltransferase 2
gene5042_AVPR1A	arginine vasopressin receptor 1A
gene5050_DPYSL4	dihydropyrimidinase like 4
gene5063_LOC110075183	major prion protein homolog
gene5065_LOC110075186	major prion protein homolog
gene5066_PLPP5	phospholipid phosphatase 5
gene5071_STAR	steroidogenic acute regulatory protein
gene5073_LOC110075194	nodal homolog 2-A-like
gene5083_ADGRA2	adhesion G protein-coupled receptor A2
gene5128_PHOX2B	paired like homeobox 2b
gene513_RHOU	ras homolog family member U
gene5141_GPC1	glypican 1
gene5145_SNED1	sushi
gene5151_HDLBP	high density lipoprotein binding protein
gene5160_D2HGDH	D-2-hydroxyglutarate dehydrogenase
gene5166_SMCO1	single-pass membrane protein with coiled-coil domains 1
gene5169_NRROS	negative regulator of reactive oxygen species
gene5172_PAK2	p21 (RAC1) activated kinase 2
gene5175_LOC110075272	ovotransferrin-like
gene52_LOC110073533	gamma-aminobutyric acid receptor subunit rho-2-like
gene5204_RGS10	regulator of G-protein signaling 10
gene5243_TP53BP2	tumor protein p53 binding protein 2
gene5259_LOC110075368	mitochondrial amidoxime reducing component 2-like
gene5260_LOC110075388	mitochondrial amidoxime reducing component 2-like
gene5264_CUNH1orf115	chromosome unknown C1orf115 homolog
gene5281_RNF152	ring finger protein 152
gene5306_TMEM27	transmembrane protein 27
gene5310_VEGFD	vascular endothelial growth factor D
gene5316_GEMIN8	gem nuclear organelle associated protein 8
gene5328_PRPS2	phosphoribosyl pyrophosphate synthetase 2
gene534_IRF2BP2	interferon regulatory factor 2 binding protein 2
gene5353_VMP1	vacuole membrane protein 1
gene5356_RNFT1	ring finger protein
gene5382_MRM1	mitochondrial rRNA methyltransferase 1
gene5386_AATF	apoptosis antagonizing transcription factor
gene540_TBCE	tubulin folding cofactor E
gene5404_NF1	neurofibromin 1
gene541_B3GALNT2	beta-1
gene5414_MIS12	MIS12
gene5415_LOC110075538	galectin-9B-like
gene5418_C1QBP	complement C1q binding protein
gene5419_CAMKK1	calcium/calmodulin dependent protein kinase kinase 1
gene5421_LOC110075507	sarcoplasmic/endoplasmic reticulum calcium ATPase 3-like
gene5423_PNPLA4	patatin like phospholipase domain containing 4
gene544_NID1	nidogen 1
gene5443_SELENOW	selenoprotein W
gene5446_NOP53	NOP53 ribosome biogenesis factor
gene5472_LOC110075641	SPARC-related modular calcium-binding protein 1-like
gene5474_SIRT2	sirtuin 2
gene5486_FOXA3	forkhead box A3
gene5489_DMWD	dystrophia myotonica
gene5502_CALM3	calmodulin 3
gene5506_PRKD2	protein kinase D2
gene551_MTR	5-methyltetrahydrofolate-homocysteine methyltransferase
gene5514_TMEM160	transmembrane protein 160
gene5518_CCDC9	coiled-coil domain containing 9
gene5521_LOC110075722	cdc42 effector protein 2-like
gene5522_LOC110075703	protein phosphatase 1 regulatory subunit 14A-like
gene5523_SPINT2	serine peptidase inhibitor
gene5526_YIF1B	Yip1 interacting factor homolog B
gene5534_PRX	periaxin
gene5536_PLD3	phospholipase D family member 3
gene5538_AKT2	AKT serine/threonine kinase 2
gene5540_TTC9B	tetratricopeptide repeat domain 9B
gene5547_LOC110075624	inositol-trisphosphate 3-kinase C-like
gene5552_LOC110075667	rho-related GTP-binding protein RhoU-like
gene5560_LOC110075784	cytochrome P450 2G1-like
gene5561_LOC110075782	cytochrome P450 2G1-like
gene5573_LOC110075669	relA-associated inhibitor-like
gene5578_VASP	vasodilator-stimulated phosphoprotein
gene5584_ACP7	acid phosphatase 7
gene5587_NCCRP1	non-specific cytotoxic cell receptor protein 1 homolog (zebrafish)
gene559_PIGM	phosphatidylinositol glycan anchor biosynthesis class M
gene5590_LOC110075794	leucine-rich repeat and fibronectin type III domain-containing protein 1-like
gene5593_LOC110075737	suppressor of cytokine signaling 5-like
gene5601_LOC110075771	neuroglobin-like
gene5608_LOC110075697	ras-related protein ORAB-1-like
gene5611_CAPNS1	calpain small subunit 1
gene5612_LOC110075788	uncharacterized LOC110075788
gene5617_CLIP3	CAP-Gly domain containing linker protein 3
gene5628_TBCCD1	TBCC domain containing 1
gene563_MAP1LC3C	microtubule associated protein 1 light chain 3 gamma
gene5634_LRRC3	leucine rich repeat containing 3
gene5651_PCCB	propionyl-CoA carboxylase beta subunit
gene5655_MSL2	male-specific lethal 2 homolog (Drosophila)
gene5659_AGXT	alanine-glyoxylate aminotransferase
gene5676_ATG16L1	autophagy related 16 like 1
gene5679_PROC	protein C
gene5680_LOC110075865	coagulation factor VII-like
gene5690_SAP130	Sin3A associated protein 130
gene5700_HNF4G	hepatocyte nuclear factor 4 gamma
gene5706_ZC2HC1A	zinc finger C2HC-type containing 1A
gene5709_STMN2	stathmin 2
gene5729_TOM1	target of myb1 membrane trafficking protein
gene5732_MCM5	minichromosome maintenance complex component 5
gene5735_LOC110075963	apolipoprotein L5-like
gene5738_RBFOX2	RNA binding protein
gene5757_C1QTNF6	C1q and TNF related 6
gene5762_MFNG	MFNG O-fucosylpeptide 3-beta-N-acetylglucosaminyltransferase
gene5764_CDC42EP1	CDC42 effector protein 1
gene5768_LGALS1	galectin 1
gene5780_CUNH22orf23	chromosome unknown C22orf23 homolog
gene5782_SOX10	SRY-box 10
gene5822_NMRK1	nicotinamide riboside kinase 1
gene5828_PCDH9	protocadherin 9
gene5868_FAM109B	family with sequence similarity 109 member B
gene5869_NAGA	alpha-N-acetylgalactosaminidase
gene5882_CSDC2	cold shock domain containing C2
gene5883_ACO2	aconitase 2
gene5889_LOC110076032	chondroadherin-like
gene5896_SLC25A17	solute carrier family 25 member 17
gene5911_LOC110076143	WD repeat and coiled-coil-containing protein-like
gene5923_NEK3	NIMA related kinase 3
gene5929_SLC25A15	solute carrier family 25 member 15
gene593_QPCT	glutaminyl-peptide cyclotransferase
gene5941_CPB2	carboxypeptidase B2
gene5942_SLC23A1	solute carrier family 23 member 1
gene5949_ECHDC2	enoyl-CoA hydratase domain containing 2
gene5955_SLC26A8	solute carrier family 26 member 8
gene5962_BTF3L4	basic transcription factor 3 like 4
gene5964_RAB3B	RAB3B
gene5971_RNF11	ring finger protein 11
gene6008_TBX20	T-box 20
gene6026_LOC110076287	zinc finger protein 423-like
gene6038_GPT2	glutamic--pyruvic transaminase 2
gene6039_CUNH16orf87	chromosome unknown C16orf87 homolog
gene604_RAD54L2	RAD54-like 2 (S. cerevisiae)
gene6040_MYLK3	myosin light chain kinase 3
gene6047_ADAT1	adenosine deaminase
gene6051_TAT	tyrosine aminotransferase
gene6052_MARVELD3	MARVEL domain containing 3
gene6054_ATXN1L	ataxin 1 like
gene6055_ZNF821	zinc finger protein 821
gene6059_DHODH	dihydroorotate dehydrogenase (quinone)
gene6074_COG8	component of oligomeric golgi complex 8
gene6078_UTP4	UTP4
gene6079_CHTF8	chromosome transmission fidelity factor 8
gene6089_TUBB3	tubulin beta 3 class III
gene6092_FANCA	Fanconi anemia complementation group A
gene6096_SPATA2L	spermatogenesis associated 2 like
gene6099_CHMP1A	charged multivesicular body protein 1A
gene6101_LOC110076314	sulfotransferase family cytosolic 2B member 1-like
gene6105_SPG7	SPG7
gene6109_ACSF3	acyl-CoA synthetase family member 3
gene6115_CDT1	chromatin licensing and DNA replication factor 1
gene6119_SNAI3	snail family transcriptional repressor 3
gene6128_CA5A	carbonic anhydrase 5A
gene6131_JPH3	junctophilin 3
gene6158_ZFP36L1	ZFP36 ring finger protein like 1
gene6176_LOC110076385	desumoylating isopeptidase 2-like
gene6192_STARD13	StAR related lipid transfer domain containing 13
gene621_RASSF1	Ras association domain family member 1
gene6214_SLC7A1	solute carrier family 7 member 1
gene622_TUSC2	tumor suppressor candidate 2
gene625_HYAL3	hyaluronoglucosaminidase 3
gene6288_COL11A1	collagen type XI alpha 1 chain
gene6289_RNPC3	RNA binding region (RNP1
gene630_LOC110076725	taste receptor type 2 member 4-like
gene6316_LOC110076540	uncharacterized LOC110076540
gene6324_TOLLIP	toll interacting protein
gene6347_LOC110076597	transmembrane protein 132D-like
gene6367_RFLNA	refilin A
gene639_GNAT1	G protein subunit alpha transducin 1
gene6407_FAM60A	family with sequence similarity 60 member A
gene644_MST1R	macrophage stimulating 1 receptor
gene6440_HDHD5	haloacid dehalogenase like hydrolase domain containing 5
gene6465_MBTPS2	membrane bound transcription factor peptidase
gene6499_GHRH	growth hormone releasing hormone
gene6517_KCNS1	potassium voltage-gated channel modifier subfamily S member 1
gene6518_LOC110076782	prostaglandin E synthase 2-like
gene6532_HNF4A	hepatocyte nuclear factor 4 alpha
gene6540_LOC110076817	myristoylated alanine-rich C-kinase substrate-like
gene6541_CLIC6	chloride intracellular channel 6
gene6579_TMPRSS2	transmembrane protease
gene662_GMPPB	GDP-mannose pyrophosphorylase B
gene6648_HGD	homogentisate 1
gene6654_LOC110076953	tumor necrosis factor receptor superfamily member 1A-like
gene6663_LOC110076950	cystatin-B-like
gene6674_WDR3	WD repeat domain 3
gene6678_HAO2	hydroxyacid oxidase 2
gene6720_PPAT	phosphoribosyl pyrophosphate amidotransferase
gene6722_CORIN	corin
gene6739_CAV2	caveolin 2
gene6753_RGS8	regulator of G-protein signaling 8
gene6765_KIAA1614	KIAA1614 ortholog
gene6770_CACNA1E	calcium voltage-gated channel subunit alpha1 E
gene6776_NPHS2	NPHS2
gene6777_LOC110077075	tudor domain-containing protein 5-like
gene6788_DUSP22	dual specificity phosphatase 22
gene6791_BPHL	biphenyl hydrolase like
gene6792_LOC110077097	tubulin beta-1 chain
gene6793_LOC110077085	tubulin beta-2 chain
gene6805_PPP1R3G	protein phosphatase 1 regulatory subunit 3G
gene682_GFRA3	GDNF family receptor alpha 3
gene6822_HOOK1	hook microtubule tethering protein 1
gene6824_FGGY	FGGY carbohydrate kinase domain containing
gene6831_C8A	complement C8 alpha chain
gene6834_CUNH1orf168	chromosome unknown C1orf168 homolog
gene6836_PLPP3	phospholipid phosphatase 3
gene6899_HGF	hepatocyte growth factor
gene6907_LOC110077292	neural Wiskott-Aldrich syndrome protein-like
gene6912_TMC3	transmembrane channel like 3
gene6913_MEX3B	mex-3 RNA binding family member B
gene6918_LOC110077295	lamin-L(III)-like
gene6922_TM6SF1	transmembrane 6 superfamily member 1
gene6924_CUNH15orf40	chromosome unknown C15orf40 homolog
gene6930_PDE8A	phosphodiesterase 8A
gene6939_LOC110077217	CDC42 small effector protein 2-B-like
gene6965_TNFAIP8L3	TNF alpha induced protein 8 like 3
gene6968_LOC110077225	tropomodulin-3-like
gene6969_LOC110077226	tropomodulin-2
gene6975_MYO5A	myosin VA
gene6979_GRAMD2	GRAM domain containing 2
gene698_SLC34A1	solute carrier family 34 member 1
gene6980_SENP8	SUMO/sentrin peptidase family member
gene6982_NR2E3	nuclear receptor subfamily 2 group E member 3
gene699_LOC110077980	alpha-2Db adrenergic receptor-like
gene6993_TP53BP1	tumor protein p53 binding protein 1
gene6994_TUBGCP4	tubulin gamma complex associated protein 4
gene6997_ANKRA2	ankyrin repeat family A member 2
gene700_F12	coagulation factor XII
gene7001_TMEM174	transmembrane protein 174
gene7022_FAM151B	family with sequence similarity 151 member B
gene703_PRR7	proline rich 7
gene7045_PLIN2	perilipin 2
gene7075_SLC5A12	solute carrier family 5 member 12
gene7090_VGF	VGF nerve growth factor inducible
gene710_ZFYVE28	zinc finger FYVE-type containing 28
gene7103_GPC2	glypican 2
gene7105_B3GALT2	beta-1
gene7116_CXXC5	CXXC finger protein 5
gene7127_AFAP1	actin filament associated protein 1
gene7137_INSM1	INSM transcriptional repressor 1
gene7140_XRN2	5'-3' exoribonuclease 2
gene7165_TFAP2B	transcription factor AP-2 beta
gene7168_MCM3	minichromosome maintenance complex component 3
gene7170_EFHC1	EF-hand domain containing 1
gene7182_LOC110077511	cytochrome P450 2K1-like
gene7197_ALDH7A1	aldehyde dehydrogenase 7 family member A1
gene7226_LOC110077557	actin-binding Rho-activating protein-like
gene7242_LOC110077624	steroid 17-alpha-hydroxylase/17
gene7243_WBP1L	WW domain binding protein 1 like
gene7247_SUFU	SUFU negative regulator of hedgehog signaling
gene7248_ACTR1A	ARP1 actin-related protein 1 homolog A
gene7259_SFXN3	sideroflexin 3
gene7271_NPM3	nucleophosmin/nucleoplasmin 3
gene7279_PPRC1	peroxisome proliferator-activated receptor gamma
gene7285_TTR	transthyretin
gene7334_CRBN	cereblon
gene7390_ALDOB	aldolase
gene7391_TMEM246	transmembrane protein 246
gene7415_NOLC1	nucleolar and coiled-body phosphoprotein 1
gene7419_LOC110077785	transmembrane protein 150A-like
gene7422_FBXL15	F-box and leucine rich repeat protein 15
gene7458_TMOD1	tropomodulin 1
gene7473_FBXO10	F-box protein 10
gene7482_NANS	N-acetylneuraminate synthase
gene7483_CCIN	calicin
gene7490_SSUH2	ssu-2 homolog (C. elegans)
gene7493_OXTR	oxytocin receptor
gene7525_KLKB1	kallikrein B1
gene7527_CLRN3	clarin 3
gene7557_CUNH19orf38	chromosome unknown C19orf38 homolog
gene7586_KANK2	KN motif and ankyrin repeat domains 2
gene7588_TSPAN16	tetraspanin 16
gene7601_LOC110077963	transmembrane protein 56-B-like
gene7608_TTC39A	tetratricopeptide repeat domain 39A
gene7613_GCDH	glutaryl-CoA dehydrogenase
gene7621_TRIP10	thyroid hormone receptor interactor 10
gene7624_LOC110078043	cadherin-19-like
gene7634_PTPN2	protein tyrosine phosphatase
gene7641_NMD3	NMD3 ribosome export adaptor
gene7645_B3GALNT1	beta-1
gene7654_LOC110078056	schwannomin-interacting protein 1-like
gene7658_LXN	latexin
gene766_ADAMTS8	ADAM metallopeptidase with thrombospondin type 1 motif 8
gene7668_P4HA3	prolyl 4-hydroxylase subunit alpha 3
gene7670_LOC110078144	sialidase-3-like
gene7675_XRRA1	X-ray radiation resistance associated 1
gene7679_POLD3	DNA polymerase delta 3
gene7689_INPPL1	inositol polyphosphate phosphatase like 1
gene769_SNX19	sorting nexin 19
gene7691_CLPB	ClpB homolog
gene7693_ARAP1	ArfGAP with RhoGAP domain
gene7694_PDE2A	phosphodiesterase 2A
gene7698_LOC110078082	folate receptor beta-like
gene7703_LOC110078128	leucine-rich repeat-containing protein 51-like
gene7704_NUMA1	nuclear mitotic apparatus protein 1
gene7706_RNF121	ring finger protein 121
gene7713_RHOG	ras homolog family member G
gene7714_LOC110078152	rho-related GTP-binding protein RhoG-like
gene7717_RRM1	ribonucleotide reductase catalytic subunit M1
gene7719_LOC110078160	olfactory receptor 51G2-like
[truncated: 261 more rows]

## Sheet: ZWC4
Gene_ID	Gene_Name
gene10_PRDM1	PR/SET domain 1
gene1000_PGC	progastricsin
gene10001_KPNA3	karyopherin subunit alpha 3
gene10005_SETDB2	SET domain bifurcated 2
gene10007_COL4A2	collagen type IV alpha 2 chain
gene10010_GABRB3	gamma-aminobutyric acid type A receptor beta3 subunit
gene10012_GABRA5	gamma-aminobutyric acid type A receptor alpha5 subunit
gene10014_GABRG3	gamma-aminobutyric acid type A receptor gamma3 subunit
gene10015_OCA2	OCA2 melanosomal transmembrane protein
gene10018_NIPA2	non imprinted in Prader-Willi/Angelman syndrome 2
gene10021_TUBGCP5	tubulin gamma complex associated protein 5
gene10028_PLCXD1	phosphatidylinositol specific phospholipase C X domain containing 1
gene10030_LOC110080686	cohesin subunit SA-2-like
gene10034_LOC110080708	pro-neuregulin-3
gene10037_LOC110080706	pro-neuregulin-3
gene1005_USP49	ubiquitin specific peptidase 49
gene10050_OGDHL	oxoglutarate dehydrogenase-like
gene10055_LOC110080727	chymotrypsin-like elastase family member 1
gene10057_SYT15	synaptotagmin 15
gene10064_PIGF	phosphatidylinositol glycan anchor biosynthesis class F
gene10066_LOC110080758	GTP cyclohydrolase 1-like
gene10068_MCFD2	multiple coagulation factor deficiency 2
gene10069_TTC7A	tetratricopeptide repeat domain 7A
gene10072_CALM2	calmodulin 2
gene10073_LOC110080754	solute carrier family 22 member 7-like
gene10076_TTBK1	tau tubulin kinase 1
gene10084_LOC110080762	cullin-9-like
gene10085_LOC110080732	cullin-9-like
gene10086_LOC110080731	cullin-9-like
gene10096_GEMIN5	gem nuclear organelle associated protein 5
gene10097_CNOT8	CCR4-NOT transcription complex subunit 8
gene10098_FAXDC2	fatty acid hydroxylase domain containing 2
gene10102_GALNT10	polypeptide N-acetylgalactosaminyltransferase 10
gene10108_LOC110080775	LON peptidase N-terminal domain and RING finger protein 1-like
gene1011_LOC110079683	acidic mammalian chitinase-like
gene10112_LAMB4	laminin subunit beta 4
gene10115_LRRK2	leucine rich repeat kinase 2
gene10116_SLC2A13	solute carrier family 2 member 13
gene10117_CUNH12orf40	chromosome unknown C12orf40 homolog
gene10119_KIF21A	kinesin family member 21A
gene1012_LOC110080680	acidic mammalian chitinase-like
gene10127_CELSR1	cadherin EGF LAG seven-pass G-type receptor 1
gene10133_DNAJC15	DnaJ heat shock protein family (Hsp40) member C15
gene10134_ENOX1	ecto-NOX disulfide-thiol exchanger 1
gene10135_CCDC122	coiled-coil domain containing 122
gene1014_LOC110081382	acidic mammalian chitinase-like
gene1015_LOC110080707	acidic mammalian chitinase-like
gene10151_MAEA	macrophage erythroblast attacher
gene10153_RIF1	replication timing regulatory factor 1
gene10154_NEB	nebulin
gene10156_CACNB4	calcium voltage-gated channel auxiliary subunit beta 4
gene1016_LOC110080716	chitinase-3-like protein 1
gene10164_RPRM	reprimo
gene10165_GALNT13	polypeptide N-acetylgalactosaminyltransferase 13
gene10168_DSP	desmoplakin
gene10174_SLC35B3	solute carrier family 35 member B3
gene10184_MAK	male germ cell associated kinase
gene10186_SYCP2L	synaptonemal complex protein 2 like
gene10187_ELOVL2	ELOVL fatty acid elongase 2
gene10188_SMIM13	small integral membrane protein 13
gene1019_BTG2	BTG anti-proliferation factor 2
gene10190_TMEM170B	transmembrane protein 170B
gene10191_ADTRP	androgen dependent TFPI regulating protein
gene10196_CLPTM1L	CLPTM1 like
gene10197_TERT	telomerase reverse transcriptase
gene10198_LOC110080883	sodium-dependent neutral amino acid transporter B(0)AT3-like
gene10200_MAJIN	membrane anchored junction protein
gene10201_SLC12A7	solute carrier family 12 member 7
gene10204_SLC39A6	solute carrier family 39 member 6
gene10212_ANKS6	ankyrin repeat and sterile alpha motif domain containing 6
gene10213_NFX1	nuclear transcription factor
gene10216_MARCH6	membrane associated ring-CH-type finger 6
gene10217_ROPN1L	rhophilin associated tail protein 1 like
gene10222_MICAL2	microtubule associated monooxygenase
gene10223_MICALCL	MICAL C-terminal like
gene10224_PARVA	parvin alpha
gene10228_ARNTL	aryl hydrocarbon receptor nuclear translocator like
gene10231_FAR1	fatty acyl-CoA reductase 1
gene10239_SPON1	spondin 1
gene10242_PLXNB2	plexin B2
gene10249_KLHL1	kelch like family member 1
gene10253_SRPK2	SRSF protein kinase 2
gene10255_PUS7	pseudouridylate synthase 7 (putative)
gene10256_RINT1	RAD50 interactor 1
gene10257_LOC110080940	EF-hand calcium-binding domain-containing protein 10-like
gene10258_ATXN7L1	ataxin 7 like 1
gene10259_CDHR3	cadherin related family member 3
gene1026_SOX13	SRY-box 13
gene10260_SYPL1	synaptophysin like 1
gene10269_SLC3A2	solute carrier family 3 member 2
gene1027_ETNK2	ethanolamine kinase 2
gene10307_LOC110081040	nuclear receptor subfamily 1 group I member 3-like
gene10308_LOC110081041	nuclear receptor subfamily 1 group I member 3-like
gene10316_LOC110080983	palmitoyltransferase ZDHHC3-like
gene10327_KIAA0907	KIAA0907 ortholog
gene10329_SYT11	synaptotagmin 11
gene10330_LOC110080987	GON-4-like protein
gene10331_LOC110080977	GON-4-like protein
gene10336_FDPS	farnesyl diphosphate synthase
gene10340_LOC110081046	complexin-3-like
gene10345_LOC110081033	glucosylceramidase-like
gene10358_DCST1	DC-STAMP domain containing 1
gene1036_MDM4	MDM4
gene10360_ZBTB7B	zinc finger and BTB domain containing 7B
gene10385_SPO11	SPO11
gene10387_LOC110081077	uncharacterized LOC110081077
gene10394_PMEPA1	prostate transmembrane protein
gene10396_CUNH20orf85	chromosome unknown C20orf85 homolog
gene10398_LOC110081093	serine/threonine-protein phosphatase 4 regulatory subunit 1-like
gene1040_CNTN2	contactin 2
gene10400_PSIP1	PC4 and SFRS1 interacting protein 1
gene10401_CCDC171	coiled-coil domain containing 171
gene10404_CNTLN	centlein
gene10409_ROR2	receptor tyrosine kinase like orphan receptor 2
gene10410_SPTLC1	serine palmitoyltransferase long chain base subunit 1
gene10415_CHSY3	chondroitin sulfate synthase 3
gene10416_ADAMTS19	ADAM metallopeptidase with thrombospondin type 1 motif 19
gene10417_ISOC1	isochorismatase domain containing 1
gene10424_MBD1	methyl-CpG binding domain protein 1
gene10427_LOC110081148	synaptonemal complex central element protein 1-like
gene10429_PTPN18	protein tyrosine phosphatase
gene1043_DSTYK	dual serine/threonine and tyrosine protein kinase
gene10436_LOC110081184	nudix hydrolase 20
gene10437_RBM10	RNA binding motif protein 10
gene10442_LOC110081158	uncharacterized LOC110081158
gene10450_LOC110081201	leucine-rich repeat neuronal protein 1-like
gene10451_CFP	complement factor properdin
gene10453_SYN1	synapsin I
gene10454_TIMP1	TIMP metallopeptidase inhibitor 1
gene10456_LOC110081127	uncharacterized LOC110081127
gene10457_LOC110081181	uncharacterized LOC110081181
gene10458_LOC110081185	uncharacterized LOC110081185
gene1046_KLHDC8A	kelch domain containing 8A
gene1047_LEMD1	LEM domain containing 1
gene10480_GRM6	glutamate metabotropic receptor 6
gene10485_WAS	Wiskott-Aldrich syndrome
gene10487_TBC1D25	TBC1 domain family member 25
gene10498_KCND1	potassium voltage-gated channel subfamily D member 1
gene10504_LOC110081232	protein MCM10 homolog
gene10505_LOC110081242	protein MCM10 homolog
gene10508_CCDC3	coiled-coil domain containing 3
gene1051_MFSD4A	major facilitator superfamily domain containing 4A
gene10513_SEC61A2	Sec61 translocon alpha 2 subunit
gene10516_LMNTD1	lamin tail domain containing 1
gene10517_RASSF8	Ras association domain family member 8
gene10519_BHLHE41	basic helix-loop-helix family member e41
gene10520_SSPN	sarcospan
gene10525_FGFR1OP2	FGFR1 oncogene partner 2
gene10526_TM7SF3	transmembrane 7 superfamily member 3
gene10530_LOC110081224	mesencephalic astrocyte-derived neurotrophic factor-like
gene10531_HSPA14	heat shock protein family A (Hsp70) member 14
gene10532_DCLRE1C	DNA cross-link repair 1C
gene10533_MEIG1	meiosis/spermiogenesis associated 1
gene10538_MCPH1	microcephalin 1
gene10539_ANGPT2	angiopoietin 2
gene1057_SLC41A1	solute carrier family 41 member 1
gene1058_PM20D1	peptidase M20 domain containing 1
gene10583_CNGB1	cyclic nucleotide gated channel beta 1
gene10596_CNOT1	CCR4-NOT transcription complex subunit 1
gene10611_PLEKHG4	pleckstrin homology and RhoGEF domain containing G4
gene10615_AGRP	agouti related neuropeptide
gene10623_ATG2B	autophagy related 2B
gene10625_AK7	adenylate kinase 7
gene10626_PAPOLA	poly(A) polymerase alpha
gene10631_LOC110081351	uncharacterized LOC110081351
gene10632_LOC110081359	uncharacterized LOC110081359
gene10633_ITGB3	integrin subunit beta 3
gene10634_LOC110081357	la-related protein 6-like
gene10637_WNT3	Wnt family member 3
gene10638_NSF	N-ethylmaleimide sensitive factor
gene10643_RDM1	RAD52 motif containing 1
gene10646_SCN4A	sodium voltage-gated channel alpha subunit 4
gene10647_ADAM11	ADAM metallopeptidase domain 11
gene10648_DBF4B	DBF4 zinc finger B
gene10650_MEIOC	meiosis specific with coiled-coil domain
gene10653_GPATCH8	G-patch domain containing 8
gene10657_GJC1	gap junction protein gamma 1
gene1066_TTC17	tetratricopeptide repeat domain 17
gene10661_GFAP	glial fibrillary acidic protein
gene10666_PLCD3	phospholipase C delta 3
gene10672_TPRA1	transmembrane protein adipocyte associated 1
gene10674_PODXL2	podocalyxin like 2
gene10680_LOC110081403	fibrinogen-like protein 1
gene10681_RPN1	ribophorin I
gene1069_HSD17B12	hydroxysteroid 17-beta dehydrogenase 12
gene10693_LOC110081423	monoacylglycerol lipase ABHD6-like
gene10695_PEAR1	platelet endothelial aggregation receptor 1
gene10696_INSRR	insulin receptor related receptor
gene10705_LOC110081510	death-associated protein kinase 2-like
gene10706_LOC110081531	uncharacterized LOC110081531
gene10709_ARHGEF11	Rho guanine nucleotide exchange factor 11
gene10720_KCNJ10	potassium voltage-gated channel subfamily J member 10
gene10721_LOC110081553	T-lymphocyte surface antigen Ly-9-like
gene10735_MTMR11	myotubularin related protein 11
gene10736_OTUD7B	OTU deubiquitinase 7B
gene10739_LOC110081519	uncharacterized LOC110081519
gene10741_LOC110081427	uncharacterized LOC110081427
gene10742_LOC110081428	uncharacterized LOC110081428
gene10747_CIART	circadian associated repressor of transcription
gene10755_ADAMTSL4	ADAMTS like 4
gene10771_CUNH1orf56	chromosome unknown C1orf56 homolog
gene10777_CERS2	ceramide synthase 2
gene10781_CTSK	cathepsin K
gene10783_HORMAD1	HORMA domain containing 1
gene10789_LOC110081435	selenium-binding protein 1-like
gene10798_SNX27	sorting nexin family member 27
gene1080_TSPAN18	tetraspanin 18
gene10806_LINGO4	leucine rich repeat and Ig domain containing 4
gene10815_FAP	fibroblast activation protein alpha
gene10818_SLC4A10	solute carrier family 4 member 10
gene10825_LY75	lymphocyte antigen 75
gene10828_BAZ2B	bromodomain adjacent to zinc finger domain 2B
gene10829_WDSUB1	WD repeat
gene10830_TANC1	tetratricopeptide repeat
gene10836_LOC110081584	kinesin-like protein KIF11
gene10837_HECW1	HECT
gene10838_STK17A	serine/threonine kinase 17a
gene10844_LANCL2	LanC like 2
gene10845_EGFR	epidermal growth factor receptor
gene10865_KIAA1257	KIAA1257 ortholog
gene10866_ACAD9	acyl-CoA dehydrogenase family member 9
gene1087_SLC35C1	solute carrier family 35 member C1
gene10872_FBXW12	F-box and WD repeat domain containing 12
gene10874_PTPDC1	protein tyrosine phosphatase domain containing 1
gene10877_PRRC2C	proline rich coiled-coil 2C
gene10879_MYOC	myocilin
gene10885_HSD17B7	hydroxysteroid 17-beta dehydrogenase 7
gene10886_LOC110081665	uncharacterized LOC110081665
gene10889_LOC110081669	P-selectin-like
gene10908_CACYBP	calcyclin binding protein
gene1091_PEX16	peroxisomal biogenesis factor 16
gene10921_KIF13A	kinesin family member 13A
gene10924_RANBP9	RAN binding protein 9
gene10926_MCUR1	mitochondrial calcium uniporter regulator 1
gene10927_RNF182	ring finger protein 182
gene10936_LOC110081706	retinal dehydrogenase 1-like
gene10940_TMC1	transmembrane channel like 1
gene10942_GDA	guanine deaminase
gene10947_KLF9	Kruppel like factor 9
gene10948_SMC5	structural maintenance of chromosomes 5
gene10955_LOC110081715	melanopsin-like
gene10957_BMPR1B	bone morphogenetic protein receptor type 1B
gene10959_DENND1C	DENN domain containing 1C
gene10977_CUNH19orf57	chromosome unknown C19orf57 homolog
gene10981_ZSWIM4	zinc finger SWIM-type containing 4
gene10987_LOC110081766	surfeit locus protein 4-like
gene10988_LOC110081767	uncharacterized LOC110081767
gene110_RGS17	regulator of G-protein signaling 17
gene1100_HARBI1	harbinger transposase derived 1
gene11001_ZGLP1	zinc finger
gene11002_ICAM5	intercellular adhesion molecule 5
gene11003_BICDL2	BICD family like cargo adaptor 2
gene11011_LOC110081839	uncharacterized LOC110081839
gene11015_DOC2A	double C2 domain alpha
gene11017_HIRIP3	HIRA interacting protein 3
gene11018_LOC110081816	dual specificity protein phosphatase 14-like
gene11019_SEZ6L2	seizure related 6 homolog like 2
gene11026_TAOK2	TAO kinase 2
gene11027_LOC110081871	uncharacterized LOC110081871
gene11034_LOC110081800	keratin-associated protein 5-5-like
gene11035_LOC110081775	crk-like protein
gene11038_TBX6	T-box 6
gene1105_CKAP5	cytoskeleton associated protein 5
gene1106_LRP4	LDL receptor related protein 4
gene11068_LOC110081777	uncharacterized LOC110081777
gene11069_IZUMO3	IZUMO family member 3
gene11074_DBP	D-box binding PAR bZIP transcription factor
gene11077_LOC110081824	uncharacterized LOC110081824
gene11080_NTN5	netrin 5
gene11082_IZUMO1	izumo sperm-egg fusion 1
gene11083_MAMSTR	MEF2 activating motif and SAP domain containing transcriptional regulator
gene11085_LOC110081782	C-Jun-amino-terminal kinase-interacting protein 4-like
gene11086_TMEM238	transmembrane protein 238
gene11088_LOC110081876	germ cell-specific gene 1-like protein
gene11090_RCVRN	recoverin
gene11095_LOC110081792	immunoglobulin superfamily member 1-like
gene11099_CNOT3	CCR4-NOT transcription complex subunit 3
gene11101_TMC4	transmembrane channel like 4
gene11107_KDELR1	KDEL endoplasmic reticulum protein retention receptor 1
gene11108_SYNGR4	synaptogyrin 4
gene1111_DDB2	damage specific DNA binding protein 2
gene11110_EMP3	epithelial membrane protein 3
gene11111_HDAC4	histone deacetylase 4
gene11113_RBM44	RNA binding motif protein 44
gene11118_FN1	fibronectin 1
gene11120_ABCA12	ATP binding cassette subfamily A member 12
gene11125_TBL1XR1	transducin beta like 1 X-linked receptor 1
gene1113_NR1H3	nuclear receptor subfamily 1 group H member 3
gene11132_PIK3CA	phosphatidylinositol-4
gene1114_MADD	MAP kinase activating death domain
gene11141_USP13	ubiquitin specific peptidase 13 (isopeptidase T-3)
gene11142_PEX5L	peroxisomal biogenesis factor 5 like
gene11145_RTN4R	reticulon 4 receptor
gene1116_SPI1	Spi-1 proto-oncogene
gene11188_RSPH14	radial spoke head 14 homolog
gene11199_GGT1	gamma-glutamyltransferase 1
gene11202_LOC110081971	histone-lysine N-methyltransferase 2A-like
gene11207_CABIN1	calcineurin binding protein 1
gene1121_CELF1	CUGBP Elav-like family member 1
gene11214_LOC110081990	solute carrier family 2
gene11217_LOC110081992	solute carrier family 2
gene11218_LOC110082001	solute carrier family 2
gene11219_LOC110081966	uncharacterized LOC110081966
gene11237_TDRD12	tudor domain containing 12
gene11243_LOC110082029	neural-cadherin-like
gene11244_DPY19L3	dpy-19 like 3 (C. elegans)
gene11253_TMUB2	transmembrane and ubiquitin like domain containing 2
gene11260_LOC110082048	microtubule-associated protein tau-like
gene11261_KANSL1	KAT8 regulatory NSL complex subunit 1
gene11264_CACNB1	calcium voltage-gated channel auxiliary subunit beta 1
gene11269_MED1	mediator complex subunit 1
gene11281_LOC110082071	retinol dehydrogenase 8-like
gene11283_ZPBP2	zona pellucida binding protein 2
gene11284_LOC110082065	gasdermin-C4-like
gene1129_FUT8	fucosyltransferase 8
gene11300_APBB3	amyloid beta precursor protein binding family B member 3
gene11339_PUS7L	pseudouridylate synthase 7 like
gene11348_GXYLT1	glucoside xylosyltransferase 1
gene11350_CNTN1	contactin 1
gene11357_OSBPL10	oxysterol binding protein like 10
gene11360_CMTM7	CKLF like MARVEL transmembrane domain containing 7
gene11366_TCAIM	T-cell activation inhibitor
gene11367_TOPAZ1	testis and ovary specific PAZ domain containing 1
gene11371_ANO10	anoctamin 10
gene11374_POMGNT2	protein O-linked mannose N-acetylglucosaminyltransferase 2 (beta 1
gene11377_ENTPD3	ectonucleoside triphosphate diphosphohydrolase 3
gene11381_NPTX2	neuronal pentraxin 2
gene11384_TECPR1	tectonin beta-propeller repeat containing 1
gene1139_LOC110082559	retinol dehydrogenase 12-like
gene11391_LOC110082176	radial spoke head 10 homolog B2-like
gene11392_PMS2	PMS1 homolog 2
gene11395_USP42	ubiquitin specific peptidase 42
gene11396_CYTH3	cytohesin 3
gene11397_LOC110082189	receptor-interacting serine/threonine-protein kinase 4-like
gene11401_OTOA	otoancorin
gene11404_LOC110082185	transmembrane protein 180-like
gene11405_CDR2	cerebellar degeneration related protein 2
gene11412_VWA3A	von Willebrand factor A domain containing 3A
gene11420_DNAH3	dynein axonemal heavy chain 3
gene1143_PIGH	phosphatidylinositol glycan anchor biosynthesis class H
gene11431_LOC110082181	acyl-coenzyme A synthetase ACSM3
gene11446_NDC1	NDC1 transmembrane nucleoporin
gene11447_YIPF1	Yip1 domain family member 1
gene11450_LRRC42	leucine rich repeat containing 42
gene11451_LDLRAD1	low density lipoprotein receptor class A domain containing 1
gene11452_TMEM59	transmembrane protein 59
gene11468_TTC22	tetratricopeptide repeat domain 22
gene11469_LEXM	lymphocyte expansion molecule
gene11471_TMEM61	transmembrane protein 61
gene11472_BSND	barttin CLCNK type accessory beta subunit
gene11478_SRSF4	serine and arginine rich splicing factor 4
gene11479_LOC110082283	lethal(3)malignant brain tumor-like protein 4
gene11480_TMEM200B	transmembrane protein 200B
gene11486_LOC110082371	diamine acetyltransferase 2-like
gene11493_CLDN7	claudin 7
gene11494_SLC2A4	solute carrier family 2 member 4
gene11495_YBX2	Y-box binding protein 2
gene11508_KCTD11	potassium channel tetramerization domain containing 11
gene11515_TMEM102	transmembrane protein 102
gene11528_FXR2	FMR1 autosomal homolog 2
gene11529_NPPC	natriuretic peptide C
gene11533_ZCWPW1	zinc finger CW-type and PWWP domain containing 1
gene11539_LOC110082298	chloride channel protein 2-like
gene11543_LOC110082321	zonadhesin-like
gene11555_LOC110082325	insulin receptor substrate 1-like
gene11557_LOC110082370	uncharacterized LOC110082370
gene11559_INCA1	inhibitor of CDK
gene11562_FBXO24	F-box protein 24
gene1157_NRP1	neuropilin 1
gene11580_LOC110082349	autophagy-related protein 16-like
gene11589_ERC2	ELKS/RAB6-interacting/CAST family member 2
gene1159_ITGB1	integrin subunit beta 1
gene11591_CCDC66	coiled-coil domain containing 66
gene11593_FAM208A	family with sequence similarity 208 member A
gene11595_IL17RD	interleukin 17 receptor D
gene11597_APPL1	adaptor protein
gene11599_DNAH12	dynein axonemal heavy chain 12
gene116_SYNE1	spectrin repeat containing nuclear envelope protein 1
gene1160_CCDC7	coiled-coil domain containing 7
gene11600_PDE12	phosphodiesterase 12
gene11602_DENND6A	DENN domain containing 6A
gene11605_FLNB	filamin B
gene11618_LOC110082442	taste receptor type 1 member 1-like
gene1162_KIF5B	kinesin family member 5B
gene11632_LOC110082448	taste receptor type 1 member 1-like
gene11645_CHD5	chromodomain helicase DNA binding protein 5
gene11651_IRX5	iroquois homeobox 5
gene11660_SRRM1	serine and arginine repetitive matrix 1
gene11661_NCMAP	non-compact myelin associated protein
gene11664_STPG1	sperm tail PG-rich repeat containing 1
gene11685_MFSD2A	major facilitator superfamily domain containing 2A
gene11688_CSMD2	CUB and Sushi multiple domains 2
gene11695_ADGRL2	adhesion G protein-coupled receptor L2
gene11712_LOC110082606	cytochrome c oxidase subunit NDUFA4-like
gene11728_LOC110082573	zinc finger protein 501-like
gene11733_LOC110082579	zinc finger protein 501-like
gene11735_KRBA1	KRAB-A domain containing 1
gene11741_SSPO	SCO-spondin
gene11755_ABCB8	ATP binding cassette subfamily B member 8
gene1176_MPP7	membrane palmitoylated protein 7
gene11760_LOC110082536	uncharacterized LOC110082536
gene11763_SLC4A2	solute carrier family 4 member 2
gene11764_FASTK	Fas activated serine/threonine kinase
gene11766_AGAP3	ArfGAP with GTPase domain
gene11774_CIB3	calcium and integrin binding family member 3
gene11788_WDR7	WD repeat domain 7
gene1179_LOC110083036	patched domain-containing protein 3-like
gene118_CCDC170	coiled-coil domain containing 170
gene1180_LOC110082623	patched domain-containing protein 3-like
gene11809_LOC110082636	protein CYR61-like
gene1181_LOC110083051	patched domain-containing protein 3-like
gene11810_LOC110082668	volume-regulated anion channel subunit LRRC8E-like
gene11811_LOC110082673	volume-regulated anion channel subunit LRRC8D-like
gene11816_CACNA1A	calcium voltage-gated channel subunit alpha1 A
gene1182_LOC110083044	phthiocerol/phenolphthiocerol synthesis polyketide synthase type I PpsD-like
gene11821_IER2	immediate early response 2
gene11831_GNPTAB	N-acetylglucosamine-1-phosphate transferase alpha and beta subunits
gene11832_SYCP3	synaptonemal complex protein 3
gene11833_CHPT1	choline phosphotransferase 1
gene1184_MASTL	microtubule associated serine/threonine kinase like
gene11840_KIAA1549	KIAA1549 ortholog
gene11844_TRIM24	tripartite motif containing 24
gene11845_AKR1D1	aldo-keto reductase family 1 member D1
gene11849_KDM7A	lysine demethylase 7A
gene11856_LOC110082698	uncharacterized LOC110082698
gene11863_SEMA3D	semaphorin 3D
gene11865_ABCG5	ATP binding cassette subfamily G member 5
gene11867_LRPPRC	leucine rich pentatricopeptide repeat containing
gene11870_PREPL	prolyl endopeptidase-like
gene11875_SRBD1	S1 RNA binding domain 1
gene11877_TMEM39B	transmembrane protein 39B
gene1188_LOC110083104	selenoprotein O-like
gene11880_LCK	LCK proto-oncogene
gene1189_APBB1IP	amyloid beta precursor protein binding family B member 1 interacting protein
gene11908_MACF1	microtubule-actin crosslinking factor 1
gene1192_MYO3A	myosin IIIA
gene11955_PIGO	phosphatidylinositol glycan anchor biosynthesis class O
gene11958_FAM205A	family with sequence similarity 205 member A
gene11976_GBA2	glucosylceramidase beta 2
gene11977_LOC110082831	synaptopodin 2-like protein
gene11981_LOC110082842	gamma-secretase subunit Aph-1b-like
gene11989_ZBTB25	zinc finger and BTB domain containing 25
gene1199_OTUD1	OTU deubiquitinase 1
gene11991_HSPA2	heat shock protein family A (Hsp70) member 2
gene11992_PPP1R36	protein phosphatase 1 regulatory subunit 36
gene11999_JAG2	jagged 2
gene120_RMND1	required for meiotic nuclear division 1 homolog
gene1200_CUNH10orf67	chromosome unknown C10orf67 homolog
gene12001_P2RX2	purinergic receptor P2X 2
gene12003_PLA2G3	phospholipase A2 group III
gene1201_PTF1A	pancreas specific transcription factor
gene12017_TCN2	transcobalamin 2
gene12019_GAL3ST1	galactose-3-O-sulfotransferase 1
gene12020_LOC110082904	zona pellucida sperm-binding protein 3-like
gene1203_ARMC3	armadillo repeat containing 3
gene12030_RHBDD3	rhomboid domain containing 3
gene12043_CABP7	calcium binding protein 7
gene12048_TMEM217	transmembrane protein 217
gene1205_SPAG6	sperm associated antigen 6
gene12059_STPG3	sperm-tail PG-rich repeat containing 3
gene1206_LOC110083403	polycomb complex protein BMI-1
gene12063_PNPLA7	patatin like phospholipase domain containing 7
gene12070_SCAI	suppressor of cancer cell invasion
gene12075_HSPA5	heat shock protein family A (Hsp70) member 5
gene12076_GAPVD1	GTPase activating protein and VPS9 domains 1
gene12084_ZBTB43	zinc finger and BTB domain containing 43
gene12087_RALGPS1	Ral GEF with PH domain and SH3 binding motif 1
gene12090_LOC110082931	uncharacterized LOC110082931
gene12091_LOC110082929	uncharacterized LOC110082929
gene12098_LOC110082965	erythrocyte band 7 integral membrane protein-like
gene12107_MTMR1	myotubularin related protein 1
gene12114_IDS	iduronate 2-sulfatase
gene12122_SPX	spexin hormone
gene12123_LOC110083001	lymphoid-restricted membrane protein-like
gene12134_ROPN1	rhophilin associated tail protein 1
gene12135_CCDC14	coiled-coil domain containing 14
gene12138_HACD2	3-hydroxyacyl-CoA dehydratase 2
gene12140_SEC22A	SEC22 homolog A
gene12143_LOC110083035	uncharacterized LOC110083035
gene12148_L3MBTL1	l(3)mbt-like 1 (Drosophila)
gene1215_PLXDC2	plexin domain containing 2
gene12152_EPB41L1	erythrocyte membrane protein band 4.1 like 1
gene1216_MALRD1	MAM and LDL receptor class A domain containing 1
gene12165_CCDC148	coiled-coil domain containing 148
gene12169_ACVR1C	activin A receptor type 1C
gene12172_ERMN	ermin
gene12173_GALNT5	polypeptide N-acetylgalactosaminyltransferase 5
gene12176_NR4A2	nuclear receptor subfamily 4 group A member 2
gene12182_TTC13	tetratricopeptide repeat domain 13
gene12190_GNPAT	glyceronephosphate O-acyltransferase
gene12191_CUNH6orf120	chromosome unknown C6orf120 homolog
gene12193_TCTE3	t-complex-associated-testis-expressed 3
gene12195_DLL1	delta like canonical Notch ligand 1
gene12200_WDR27	WD repeat domain 27
gene12209_PTBP2	polypyrimidine tract binding protein 2
gene1221_PDLIM3	PDZ and LIM domain 3
gene12210_KIF16B	kinesin family member 16B
gene12211_LOC110083101	O-acetyl-ADP-ribose deacetylase MACROD2-like
gene12212_LOC110083098	O-acetyl-ADP-ribose deacetylase MACROD2-like
gene12215_SEL1L2	SEL1L2 ERAD E3 ligase adaptor subunit
gene12217_ESF1	ESF1 nucleolar pre-rRNA processing protein homolog
gene1222_CCDC110	coiled-coil domain containing 110
gene12235_ATAD1	ATPase family
gene12237_MINPP1	multiple inositol-polyphosphate phosphatase 1
gene12239_SGMS1	sphingomyelin synthase 1
gene12244_LOC110083128	clathrin heavy chain 2-like
gene12247_SEC63	SEC63 homolog
gene12253_AFG1L	AFG1 like ATPase
gene12256_ARMC2	armadillo repeat containing 2
gene12259_LOC110083149	uncharacterized LOC110083149
gene1226_LRP2BP	LRP2 binding protein
gene12263_AK9	adenylate kinase 9
gene12274_FUT10	fucosyltransferase 10
gene12276_KCMF1	potassium channel modulatory factor 1
gene12277_HOOK3	hook microtubule tethering protein 3
gene1228_SNX25	sorting nexin 25
gene12280_CHRNB3	cholinergic receptor nicotinic beta 3 subunit
gene12283_DNAH6	dynein axonemal heavy chain 6
gene12290_TUB	tubby bipartite transcription factor
gene12299_ENAM	enamelin
gene1230_SLC25A4	solute carrier family 25 member 4
gene12300_AMBN	ameloblastin
gene12301_AMTN	amelotin
gene12303_LPL	lipoprotein lipase
gene12314_FSD1L	fibronectin type III and SPRY domain containing 1 like
gene12315_FKTN	fukutin
gene12326_CENPQ	centromere protein Q
gene12327_MUT	methylmalonyl-CoA mutase
gene12329_LOC110083223	zinc finger protein 726-like
gene1233_CENPU	centromere protein U
gene12333_RUNX2	runt related transcription factor 2
gene12336_ENPP4	ectonucleotide pyrophosphatase/phosphodiesterase 4 (putative)
gene12337_ENPP5	ectonucleotide pyrophosphatase/phosphodiesterase 5 (putative)
gene1234_PRIMPOL	primase and DNA directed polymerase
gene12340_TDRD6	tudor domain containing 6
gene12343_LOC110083215	calcium/calmodulin-dependent 3'
gene12350_VLDLR	very low density lipoprotein receptor
gene12354_RFX3	regulatory factor X3
gene12356_SLC1A1	solute carrier family 1 member 1
gene12362_LOC110083251	relaxin-3-like
gene12365_STK24	serine/threonine kinase 24
gene12366_SLC15A1	solute carrier family 15 member 1
gene12367_DOCK9	dedicator of cytokinesis 9
gene12368_UBAC2	UBA domain containing 2
gene12370_GPR183	G protein-coupled receptor 183
gene12371_TM9SF2	transmembrane 9 superfamily member 2
gene12374_ZIC2	Zic family member 2
gene12379_LOC110083279	septin-4-like
gene12388_TRIM50	tripartite motif containing 50
gene12395_LOC110083282	C-C motif chemokine 3-like
gene12397_LOC110083276	C-C motif chemokine 4-like
gene12399_POM121C	POM121 transmembrane nucleoporin C
gene12400_TEKT1	tektin 1
gene12419_EOGT	EGF domain specific O-linked N-acetylglucosamine transferase
gene12420_TMF1	TATA element modulatory factor 1
gene12422_ARL6IP5	ADP ribosylation factor like GTPase 6 interacting protein 5
gene12433_CDS1	CDP-diacylglycerol synthase 1
gene12435_GPAT3	glycerol-3-phosphate acyltransferase 3
gene12443_LIN54	lin-54 DREAM MuvB core complex component
gene12460_LOC110083339	sodium/calcium exchanger 1-like
gene12463_FKBP2	FK506 binding protein 2
gene12467_TRPT1	tRNA phosphotransferase 1
gene1247_WWC2	WW and C2 domain containing 2
gene12471_FBXO15	F-box protein 15
gene12474_CUNH18orf63	chromosome unknown C18orf63 homolog
gene12475_FAM69C	family with sequence similarity 69 member C
gene1248_DCTD	dCMP deaminase
gene12480_LOC110083374	zinc finger protein 407-like
gene12485_LOC110083393	tubulin alpha-3 chain
gene12489_ITM2C	integral membrane protein 2C
gene12491_LOC110083392	transcription cofactor HES-6-like
gene12496_DIS3	DIS3 homolog
gene12519_CHEK2	checkpoint kinase 2
gene12522_XBP1	X-box binding protein 1
gene12526_TCHP	trichoplein keratin filament binding
gene12534_MYO1H	myosin IH
gene12535_FOXN4	forkhead box N4
gene12536_ACACB	acetyl-CoA carboxylase beta
gene12550_WSCD2	WSC domain containing 2
gene12573_TLL1	tolloid like 1
gene1258_ASB5	ankyrin repeat and SOCS box containing 5
gene12584_MSMO1	methylsterol monooxygenase 1
gene12585_KLHL2	kelch like family member 2
gene12597_MBIP	MAP3K12 binding inhibitory protein 1
gene1260_WDR17	WD repeat domain 17
gene12601_RALGAPA1	Ral GTPase activating protein catalytic alpha subunit 1
gene12608_TRPC1	transient receptor potential cation channel subfamily C member 1
gene12609_PCOLCE2	procollagen C-endopeptidase enhancer 2
gene1261_GPM6A	glycoprotein M6A
gene12610_PAQR9	progestin and adipoQ receptor family member 9
gene12611_U2SURP	U2 snRNP associated SURP domain containing
gene12617_RNF17	ring finger protein 17
gene12618_CENPJ	centromere protein J
gene12619_PARP4	poly(ADP-ribose) polymerase family member 4
gene1262_GLRA3	glycine receptor alpha 3
gene12621_PSPC1	paraspeckle component 1
gene12623_ZMYM2	zinc finger MYM-type containing 2
gene12625_LOC110083544	gap junction beta-2 protein-like
gene12628_IFT88	intraflagellar transport 88
gene12629_IL17D	interleukin 17D
gene12630_EEF1AKMT1	EEF1A lysine methyltransferase 1
gene12633_LATS2	large tumor suppressor kinase 2
gene12637_ZDHHC20	zinc finger DHHC-type containing 20
gene12642_PDCD6IP	programmed cell death 6 interacting protein
gene12646_FBXL2	F-box and leucine rich repeat protein 2
gene12666_ENPEP	glutamyl aminopeptidase
gene12669_AP1AR	adaptor related protein complex 1 associated regulatory protein
gene12672_ZGRF1	zinc finger GRF-type containing 1
gene12674_LOC110083590	ankyrin-2-like
gene12678_MCM9	minichromosome maintenance 9 homologous recombination repair factor
gene12680_CEP85L	centrosomal protein 85 like
gene12688_DCBLD1	discoidin
gene12690_RFX6	regulatory factor X6
gene12696_LOC110083614	dehydrogenase/reductase SDR family member 1-like
gene1270_GALNT7	polypeptide N-acetylgalactosaminyltransferase 7
gene12701_TRIP11	thyroid hormone receptor interactor 11
gene12702_ATXN3	ataxin 3
gene12705_SLC24A4	solute carrier family 24 member 4
gene12710_CHGA	chromogranin A
gene12714_UBR7	ubiquitin protein ligase E3 component n-recognin 7 (putative)
gene12718_FAM181A	family with sequence similarity 181 member A
gene12719_ASB2	ankyrin repeat and SOCS box containing 2
gene12722_SLC16A9	solute carrier family 16 member 9
gene12724_FAM13C	family with sequence similarity 13 member C
gene12734_BMS1	BMS1
gene12735_LOC110083669	heparan-alpha-glucosaminide N-acetyltransferase-like
gene12757_TSPAN14	tetraspanin 14
gene12758_LOC110083682	rap1 GTPase-GDP dissociation stimulator 1-like
gene12764_LPIN1	lipin 1
gene12767_ROCK2	Rho associated coiled-coil containing protein kinase 2
gene12771_LOC110083700	lysine-specific demethylase 4C-like
gene12778_ACKR3	atypical chemokine receptor 3
gene12781_COL6A3	collagen type VI alpha 3 chain
gene12782_MLPH	melanophilin
gene12789_GNA12	G protein subunit alpha 12
gene12790_CARD11	caspase recruitment domain family member 11
gene12791_SDK1	sidekick cell adhesion molecule 1
gene12797_LOC110083737	cytochrome P450 3A24-like
gene12799_LOC110083731	cytochrome P450 3A29-like
gene128_PCMT1	protein-L-isoaspartate (D-aspartate) O-methyltransferase
gene12805_TNRC18	trinucleotide repeat containing 18
gene12809_SYVN1	synoviolin 1
gene12810_LOC110083759	NACHT
gene12813_SLC25A45	solute carrier family 25 member 45
gene12824_TMEM79	transmembrane protein 79
gene12827_TSACC	TSSK6 activating cochaperone
gene12834_SSR2	signal sequence receptor subunit 2
gene12835_LOC110083784	golgin subfamily A member 6-like protein 22
gene12836_JKAMP	JNK1/MAPK8-associated membrane protein
gene12845_TOMM20L	translocase of outer mitochondrial membrane 20 like
gene1285_TMEM40	transmembrane protein 40
gene12852_OTX2	orthodenticle homeobox 2
gene12865_CNBP	CCHC-type zinc finger nucleic acid binding protein
gene12866_RAF1	Raf-1 proto-oncogene
gene1287_DCP1A	decapping mRNA 1A
gene12877_HRH1	histamine receptor H1
gene12878_SLC6A1	solute carrier family 6 member 1
gene12881_TMEM116	transmembrane protein 116
gene1289_CHDH	choline dehydrogenase
gene12892_CCDC63	coiled-coil domain containing 63
gene12895_TCTN1	tectonic family member 1
gene12896_PPTC7	PTC7 protein phosphatase homolog
gene12898_RAD9B	RAD9 checkpoint clamp component B
gene12903_CLIP1	CAP-Gly domain containing linker protein 1
gene12907_B3GNT4	UDP-GlcNAc:betaGal beta-1
gene12908_LRRC43	leucine rich repeat containing 43
gene1292_SELENOK	selenoprotein K
gene12922_ANAPC5	anaphase promoting complex subunit 5
gene12927_ATP2A2	ATPase sarcoplasmic/endoplasmic reticulum Ca2+ transporting 2
gene12931_DENR	density regulated re-initiation and release factor
gene12933_HIP1R	huntingtin interacting protein 1 related
gene12935_ABCB9	ATP binding cassette subfamily B member 9
gene12937_ARL6IP4	ADP ribosylation factor like GTPase 6 interacting protein 4
gene12951_TCTN2	tectonic family member 2
gene12952_DIAPH2	diaphanous related formin 2
gene12954_UGT8	UDP glycosyltransferase 8
gene12957_ARSJ	arylsulfatase family member J
gene12959_LOC110083900	ankyrin-2-like
gene12961_GRIP2	glutamate receptor interacting protein 2
gene12963_CUNH3orf20	chromosome unknown C3orf20 homolog
gene12968_TRH	thyrotropin releasing hormone
gene12976_YIPF4	Yip1 domain family member 4
gene12978_RMDN2	regulator of microtubule dynamics 2
gene12981_RNF212	ring finger protein 212
gene12986_HEATR5B	HEAT repeat containing 5B
gene12987_STRN	striatin
gene13_POPDC3	popeye domain containing 3
gene13003_PMS1	PMS1 homolog 1
gene13009_NEMP2	nuclear envelope integral membrane protein 2
gene13012_GLS	glutaminase
gene13018_STPG2	sperm tail PG-rich repeat containing 2
gene13020_TSPAN5	tetraspanin 5
gene13030_ABCC8	ATP binding cassette subfamily C member 8
gene13032_LOC110083979	uncharacterized LOC110083979
gene13033_NUCB2	nucleobindin 2
gene13036_PLEKHA7	pleckstrin homology domain containing A7
gene13041_GPRC5B	G protein-coupled receptor class C group 5 member B
gene13046_GDE1	glycerophosphodiester phosphodiesterase 1
gene13047_TMC5	transmembrane channel like 5
gene13049_LOC110083992	uncharacterized LOC110083992
gene13053_SYT17	synaptotagmin 17
gene13054_CLEC19A	C-type lectin domain containing 19A
gene1306_PPP1R12A	protein phosphatase 1 regulatory subunit 12A
gene13060_LOC110084023	netrin-1
gene13065_USP43	ubiquitin specific peptidase 43
gene13069_LOC110084025	CMT1A duplicated region transcript 1 protein-like
gene1307_PAWR	pro-apoptotic WT1 regulator
gene13077_ARHGEF4	Rho guanine nucleotide exchange factor 4
gene1308_SYT1	synaptotagmin 1
gene13082_KLHL24	kelch like family member 24
gene13083_YEATS2	YEATS domain containing 2
gene13088_ALDH18A1	aldehyde dehydrogenase 18 family member A1
gene13093_ABCC2	ATP binding cassette subfamily C member 2
gene13095_LOC110084033	cytochrome c oxidase assembly protein COX15 homolog
gene13096_LOC110084058	V-type proton ATPase subunit e 2
gene13097_ENTPD7	ectonucleoside triphosphate diphosphohydrolase 7
gene13098_SLC25A28	solute carrier family 25 member 28
gene13102_CNNM1	cyclin and CBS domain divalent metal cation transport mediator 1
gene13104_HPSE2	heparanase 2 (inactive)
gene13105_PTPRZ1	protein tyrosine phosphatase
gene13112_IQUB	IQ motif and ubiquitin domain containing
gene13114_ASB15	ankyrin repeat and SOCS box containing 15
gene13115_LMOD2	leiomodin 2
gene13116_WASL	Wiskott-Aldrich syndrome like
gene13120_GPR37	G protein-coupled receptor 37
gene13124_EXPH5	exophilin 5
gene13126_CUNH11orf65	chromosome unknown C11orf65 homolog
gene13127_ATM	ATM serine/threonine kinase
gene13148_CUNH4orf22	chromosome unknown C4orf22 homolog
gene13153_PLCE1	phospholipase C epsilon 1
gene13155_TBC1D12	TBC1 domain family member 12
gene13157_FGFBP3	fibroblast growth factor binding protein 3
gene13158_TNKS2	tankyrase 2
gene13161_HECTD2	HECT domain E3 ubiquitin protein ligase 2
gene13164_ANKRD1	ankyrin repeat domain 1
gene13166_HTR7	5-hydroxytryptamine receptor 7
gene13167_KIF20B	kinesin family member 20B
gene13171_ASAH2	N-acylsphingosine amidohydrolase 2
gene13188_TMEM50A	transmembrane protein 50A
gene13202_PCDH17	protocadherin 17
gene13206_LRRC2	leucine rich repeat containing 2
gene13218_FANCC	Fanconi anemia complementation group C
gene13228_ANKS1B	ankyrin repeat and sterile alpha motif domain containing 1B
gene1323_LOC110084809	GLIPR1-like protein 1
gene13230_UHRF1BP1L	UHRF1 binding protein 1 like
gene13236_GAS2L3	growth arrest specific 2 like 3
gene1324_LOC110084798	GLIPR1-like protein 1
gene13249_PELI1	pellino E3 ubiquitin protein ligase 1
gene1325_CCDC107	coiled-coil domain containing 107
gene13253_WDPCP	WD repeat containing planar cell polarity effector
gene13257_MLH1	mutL homolog 1
gene1326_CAPS2	calcyphosine 2
gene13261_GOLGA4	golgin A4
gene13267_CCDC129	coiled-coil domain containing 129
gene13268_PPP1R17	protein phosphatase 1 regulatory subunit 17
gene13276_SCARF1	scavenger receptor class F member 1
gene13277_RILP	Rab interacting lysosomal protein
gene1328_TRHDE	thyrotropin releasing hormone degrading enzyme
gene13284_SMYD4	SET and MYND domain containing 4
gene1329_TPH2	tryptophan hydroxylase 2
gene1330_TBC1D15	TBC1 domain family member 15
gene13301_PIGS	phosphatidylinositol glycan anchor biosynthesis class S
gene13303_SPAG5	sperm associated antigen 5
gene13305_KIAA0100	KIAA0100 ortholog
gene13306_SDF2	stromal cell derived factor 2
gene13313_TLCD1	TLC domain containing 1
gene13314_NEK8	NIMA related kinase 8
gene1332_TMEM19	transmembrane protein 19
gene1333_ZFC3H1	zinc finger C3H1-type containing
gene13336_SLC6A4	solute carrier family 6 member 4
gene1334_LGR5	leucine rich repeat containing G protein-coupled receptor 5
gene13344_TGOLN2	trans-golgi network protein 2
gene13345_TCF7L1	transcription factor 7 like 1
gene13349_AEBP1	AE binding protein 1
gene13353_GCK	glucokinase
gene13355_CAMK2B	calcium/calmodulin dependent protein kinase II beta
gene13358_PGAM2	phosphoglycerate mutase 2
gene13366_LOX	lysyl oxidase
gene13372_FBXO7	F-box protein 7
gene13373_BPIFC	BPI fold containing family C
gene13379_CRY1	cryptochrome circadian clock 1
gene13383_RFX4	regulatory factor X4
gene13384_POLR3B	RNA polymerase III subunit B
gene13386_CKAP4	cytoskeleton associated protein 4
gene13396_HEXA	hexosaminidase subunit alpha
gene1340_LOC110085094	intermediate filament protein ON3-like
gene13403_HCN4	hyperpolarization activated cyclic nucleotide gated potassium channel 4
gene13404_NPTN	neuroplastin
gene13407_UBR2	ubiquitin protein ligase E3 component n-recognin 2
gene1341_LOC110085108	keratin
gene13410_BICRAL	BRD4 interacting chromatin remodelling complex associated protein like
gene13418_LOC110084420	proline-rich extensin-like protein EPR1
gene13420_LOC110084421	SH3 and multiple ankyrin repeat domains protein 3-like
gene13436_FSCN3	fascin actin-bundling protein 3
gene13441_SBF1	SET binding factor 1
gene13449_FES	FES proto-oncogene
gene13450_LOC110084457	furin-like
gene13478_PPM1M	protein phosphatase
gene13490_LOC110084485	protein ABHD14A-like
gene13509_LOC110084507	claudin-4-like
gene13512_LOC110084535	claudin-3-like
gene13532_SUMF2	sulfatase modifying factor 2
gene13548_UNC45B	unc-45 myosin chaperone B
gene13565_SMC1B	structural maintenance of chromosomes 1B
gene13567_RIBC2	RIB43A domain with coiled-coils 2
gene13568_FBLN1	fibulin 1
gene13571_HEXB	hexosaminidase subunit beta
gene13576_ANKRD31	ankyrin repeat domain 31
gene13580_ANKDD1B	ankyrin repeat and death domain containing 1B
gene13582_SV2C	synaptic vesicle glycoprotein 2C
gene13584_ACO1	aconitase 1
gene13589_SCAMP1	secretory carrier membrane protein 1
gene1359_MAP3K2	mitogen-activated protein kinase kinase kinase 2
gene13590_AP3B1	adaptor related protein complex 3 beta 1 subunit
gene13599_F2RL1	F2R like trypsin receptor 1
gene13602_IQGAP2	IQ motif containing GTPase activating protein 2
gene13603_F2RL2	coagulation factor II thrombin receptor like 2
gene13608_CCDC141	coiled-coil domain containing 141
gene13609_TTN	titin
gene13611_PLEKHA3	pleckstrin homology domain containing A3
gene13612_FKBP7	FK506 binding protein 7
gene13613_DFNB59	deafness
gene13615_OSBPL6	oxysterol binding protein like 6
gene13622_IFFO1	intermediate filament family orphan 1
gene13626_ACRBP	acrosin binding protein
gene13637_LOC110084638	T-cell surface glycoprotein CD4-like
gene13640_GNB3	G protein subunit beta 3
gene13651_LPCAT3	lysophosphatidylcholine acyltransferase 3
gene13652_C1S	complement C1s
gene13653_C1R	complement C1r
gene13657_PEX5	peroxisomal biogenesis factor 5
gene13660_PLEKHA5	pleckstrin homology domain containing A5
gene13661_LOC110084675	1-phosphatidylinositol 4
gene13663_LOC110084670	1-phosphatidylinositol 4
gene13672_NAA16	N(alpha)-acetyltransferase 16
gene13676_DGKH	diacylglycerol kinase eta
gene13677_AKAP11	A-kinase anchoring protein 11
gene13680_LOC110084712	H(+)/Cl(-) exchange transporter 7-like
gene13691_LOC110084704	lysosomal alpha-glucosidase-like
gene137_UST	uronyl 2-sulfotransferase
gene13706_LOC110084736	piezo-type mechanosensitive ion channel component 2-like
gene13710_CTSZ	cathepsin Z
gene13715_LOC110084733	aurora kinase C-like
gene13716_LOC110084723	androgen-induced gene 1 protein-like
gene13717_ZNF831	zinc finger protein 831
gene13722_LOC110084727	synaptonemal complex protein 2-like
gene13728_SLC38A11	solute carrier family 38 member 11
gene13742_CCDC191	coiled-coil domain containing 191
gene13745_ZBTB20	zinc finger and BTB domain containing 20
gene13753_PARPBP	PARP1 binding protein
gene13754_PMCH	pro-melanin concentrating hormone
gene13755_IGF1	insulin like growth factor 1
gene13756_LOC110084772	tyrosine 3-monooxygenase-like
gene13758_ASCL1	achaete-scute family bHLH transcription factor 1
gene13760_NT5DC3	5'-nucleotidase domain containing 3
gene13761_HSP90B1	heat shock protein 90 beta family member 1
gene13768_CHST11	carbohydrate sulfotransferase 11
gene13774_MAPK15	mitogen-activated protein kinase 15
gene13775_FAM83H	family with sequence similarity 83 member H
gene13776_LOC110084849	putative IQ motif and ankyrin repeat domain-containing protein
gene13782_LOC110084820	epiplakin-like
gene13783_LOC110084823	GAS2-like protein 1
gene13784_LOC110084799	microtubule-actin cross-linking factor 1-like
gene13786_LOC110084800	dystonin-like
gene1379_INHBB	inhibin beta B subunit
gene13791_LOC110084795	speriolin-like protein
gene13801_WDR97	WD repeat domain 97
gene13803_LOC110084807	NFX1-type zinc finger-containing protein 1-like
gene13806_MROH1	maestro heat like repeat family member 1
gene13811_LOC110084834	riboflavin transporter 2-like
gene13828_DENND3	DENN domain containing 3
gene1383_TSN	translin
gene13837_LOC110084858	mas-related G-protein coupled receptor member H-like
gene13845_SLC6A20	solute carrier family 6 member 20
gene13846_LZTFL1	leucine zipper transcription factor like 1
gene13853_TOPBP1	topoisomerase (DNA) II binding protein 1
gene13854_CDV3	CDV3 homolog
gene13860_UBA5	ubiquitin like modifier activating enzyme 5
gene13863_DNAJC13	DnaJ heat shock protein family (Hsp40) member C13
gene13866_LOC110084866	prostatic acid phosphatase-like
gene13869_BHLHE23	basic helix-loop-helix family member e23
gene1387_LOC110085710	uncharacterized LOC110085710
gene13872_DIDO1	death inducer-obliterator 1
gene13873_TCFL5	transcription factor like 5
gene13878_NTSR1	neurotensin receptor 1
gene13879_SLCO4A1	solute carrier organic anion transporter family member 4A1
gene13894_IFNLR1	interferon lambda receptor 1
gene1390_DIRC2	disrupted in renal carcinoma 2
gene13910_SLC25A14	solute carrier family 25 member 14
gene13918_LOC110084944	magnesium transporter NIPA2-like
gene13921_LOC110084945	neurofilament medium polypeptide-like
gene13927_SLITRK4	SLIT and NTRK like family member 4
gene13935_MACROD1	MACRO domain containing 1
gene1395_NDFIP1	Nedd4 family interacting protein 1
gene13958_TSC2	tuberous sclerosis 2
gene13967_PGP	phosphoglycolate phosphatase
gene13978_RBBP6	RB binding protein 6
gene13989_GGA2	golgi associated
gene13998_LOC110085007	interleukin-4 receptor subunit alpha-like
gene13999_LOC110085001	interleukin-9 receptor-like
gene140_STXBP5	syntaxin binding protein 5
gene1400_YIPF5	Yip1 domain family member 5
gene14004_GNPTG	N-acetylglucosamine-1-phosphate transferase gamma subunit
gene14015_PDZD2	PDZ domain containing 2
gene14020_RAX	retina and anterior neural fold homeobox
gene14024_ZNF532	zinc finger protein 532
gene14027_LOC110085076	leucine-rich repeat-containing protein 37A2-like
gene14030_NEDD4L	neural precursor cell expressed
gene14035_FHOD3	formin homology 2 domain containing 3
gene14039_GALNT1	polypeptide N-acetylgalactosaminyltransferase 1
gene14043_TMEM245	transmembrane protein 245
gene14049_TMIE	transmembrane inner ear
gene14056_CUNH1orf35	chromosome unknown C1orf35 homolog
gene14064_WWP1	WW domain containing E3 ubiquitin protein ligase 1
gene14066_CPNE3	copine 3
gene14068_CNBD1	cyclic nucleotide binding domain containing 1
gene14071_CADPS	calcium dependent secretion activator
gene14074_PTPRG	protein tyrosine phosphatase
gene14075_MMP28	matrix metallopeptidase 28
gene1408_RBM27	RNA binding motif protein 27
gene14081_STYXL1	serine/threonine/tyrosine interacting like 1
gene14084_SRRM3	serine/arginine repetitive matrix 3
gene1410_TCERG1	transcription elongation regulator 1
gene14101_ZNF462	zinc finger protein 462
gene14109_CDK3	cyclin dependent kinase 3
gene14110_TEN1	TEN1
gene14112_FBF1	Fas binding factor 1
gene14118_UNC13D	unc-13 homolog D
gene14129_LOC110085192	unconventional myosin-XV-like
gene1413_LOC110085944	uncharacterized LOC110085944
gene14130_LOC110085194	pollen-specific leucine-rich repeat extensin-like protein 1
gene14147_SYNPR	synaptoporin
gene14148_LNPK	lunapark
gene14154_GPR155	G protein-coupled receptor 155
gene14156_CIR1	corepressor interacting with RBPJ
gene14157_SP9	Sp9 transcription factor
gene14159_GRIA4	glutamate ionotropic receptor AMPA type subunit 4
gene14160_MSANTD4	Myb/SANT DNA binding domain containing 4 with coiled-coils
gene14165_RDX	radixin
gene14183_CCDC158	coiled-coil domain containing 158
gene14185_FAM47E	family with sequence similarity 47 member E
gene14186_SCARB2	scavenger receptor class B member 2
gene14189_NAAA	N-acylethanolamine acid amidase
gene14195_UTP3	UTP3
gene142_ADGB	androglobin
gene14200_LOC110085293	patatin-like phospholipase domain-containing protein 1
gene14201_CACNA1S	calcium voltage-gated channel subunit alpha1 S
gene14204_CUNH1orf106	chromosome unknown C1orf106 homolog
gene14216_SORT1	sortilin 1
gene14219_ATXN7L2	ataxin 7 like 2
gene14220_LOC110085268	cytochrome b561 domain-containing protein 1
gene14222_GPR61	G protein-coupled receptor 61
gene14226_AMPD2	adenosine monophosphate deaminase 2
gene14230_MYC	MYC proto-oncogene
gene14232_LOC110085303	kelch-like protein 12
gene14239_MFSD4B	major facilitator superfamily domain containing 4B
gene1424_LOC110086031	neuron-specific protein family member 2
gene14242_FYN	FYN proto-oncogene
gene14245_LAMA4	laminin subunit alpha 4
gene14247_MAPK10	mitogen-activated protein kinase 10
gene1425_CUNH5orf47	chromosome unknown C5orf47 homolog
gene14254_IBSP	integrin binding sialoprotein
gene14256_MGAM	maltase-glucoamylase
gene14260_LOC110085335	mitochondrial sodium/hydrogen exchanger 9B2-like
gene14263_MANBA	mannosidase beta
gene14264_NFKB1	nuclear factor kappa B subunit 1
gene14269_DDIT4L	DNA damage inducible transcript 4 like
gene1427_LOC110086270	uncharacterized LOC110086270
gene14270_LOC110085350	uncharacterized protein YbeT-like
gene14272_DNAJB14	DnaJ heat shock protein family (Hsp40) member B14
gene14276_ARVCF	armadillo repeat gene deleted in velocardiofacial syndrome
gene14284_CLDN5	claudin 5
gene14295_LOC110085373	uncharacterized LOC110085373
gene14296_DDX60	DExD/H-box helicase 60
gene14301_NEK1	NIMA related kinase 1
gene14303_LOC110085378	histone PARylation factor 1
gene14305_MFAP3L	microfibrillar associated protein 3 like
gene14307_AADAT	aminoadipate aminotransferase
gene14311_MAP3K1	mitogen-activated protein kinase kinase kinase 1
gene14313_IL6ST	interleukin 6 signal transducer
gene14316_DDX4	DEAD-box helicase 4
gene14321_CCNO	cyclin O
gene14329_SLC17A6	solute carrier family 17 member 6
gene1433_CREBRF	CREB3 regulatory factor
gene14334_UNC50	unc-50 inner nuclear membrane RNA binding protein
gene14336_KIAA1211L	KIAA1211 like
gene14337_TSGA10	testis specific 10
gene1434_ATP6V0E1	ATPase H+ transporting V0 subunit e1
gene14343_REV1	REV1
gene14351_NPAS2	neuronal PAS domain protein 2
gene14354_CNOT11	CCR4-NOT transcription complex subunit 11
gene14365_DMRT3	doublesex and mab-3 related transcription factor 3
gene14368_KANK1	KN motif and ankyrin repeat domains 1
gene1437_DUSP1	dual specificity phosphatase 1
gene14375_PIP5K1B	phosphatidylinositol-4-phosphate 5-kinase type 1 beta
gene14381_HACD3	3-hydroxyacyl-CoA dehydratase 3
gene14383_DENND4A	DENN domain containing 4A
gene14404_LOC110085510	dipeptidase 2-like
gene14421_TMEM30B	transmembrane protein 30B
gene14426_ZBBX	zinc finger B-box domain containing
gene14428_WDR49	WD repeat domain 49
gene14429_PDCD10	programmed cell death 10
gene14430_CPZ	carboxypeptidase Z
gene14432_ACOX3	acyl-CoA oxidase 3
gene14433_HTRA3	HtrA serine peptidase 3
gene14436_LOC110085523	solute carrier family 2
gene14449_GOLIM4	golgi integral membrane protein 4
gene14452_SERPINI1	serpin family I member 1
gene14456_GOLM1	golgi membrane protein 1
gene14463_CTSL	cathepsin L
gene14473_NR1D1	nuclear receptor subfamily 1 group D member 1
gene1448_LOC110086298	complement factor H-like
gene14483_TOP2A	topoisomerase (DNA) II alpha
gene14484_LOC110085567	collagen alpha-1(XV) chain-like
gene14487_TNS4	tensin 4
gene14493_TMEM129	transmembrane protein 129
gene14497_LETM1	leucine zipper and EF-hand containing transmembrane protein 1
gene14498_NSD2	nuclear receptor binding SET domain protein 2
gene14502_NAT8L	N-acetyltransferase 8 like
gene14507_ALG1	ALG1
gene14511_MEIOB	meiosis specific with OB domains
gene14513_HS3ST6	heparan sulfate-glucosamine 3-sulfotransferase 6
gene14517_C1QTNF8	C1q and TNF related 8
gene14521_MMRN2	multimerin 2
gene14529_FOXO6	forkhead box O6
gene14530_EDN2	endothelin 2
gene14531_HIVEP3	human immunodeficiency virus type I enhancer binding protein 3
gene14544_GRK2	G protein-coupled receptor kinase 2
gene14547_SSH3	slingshot protein phosphatase 3
gene1455_EFHB	EF-hand domain family member B
gene14552_CLCF1	cardiotrophin like cytokine factor 1
gene1457_PP2D1	protein phosphatase 2C like domain containing 1
gene14574_CUNH1orf141	chromosome unknown C1orf141 homolog
gene14575_SLC35D1	solute carrier family 35 member D1
gene14576_MIER1	MIER1 transcriptional regulator
gene14577_WDR78	WD repeat domain 78
gene1458_KAT2B	lysine acetyltransferase 2B
gene14581_PDE4B	phosphodiesterase 4B
gene14588_JAK1	Janus kinase 1
gene14598_LOC110085700	protein NLRC5-like
gene146_SHPRH	SNF2 histone linker PHD RING helicase
gene14600_CETP	cholesteryl ester transfer protein
gene14616_LOC110085721	F-box/LRR-repeat protein 8-like
gene14617_LOC110085718	F-box/LRR-repeat protein 8-like
gene14624_OSGIN1	oxidative stress induced growth inhibitor 1
gene14629_LOC110085738	uncharacterized LOC110085738
gene14631_PHIP	pleckstrin homology domain interacting protein
gene14635_HTR1B	5-hydroxytryptamine receptor 1B
gene14636_LOC110085756	ryanodine receptor 3-like
gene14638_FMN1	formin 1
gene1464_NKIRAS1	NFKB inhibitor interacting Ras like 1
gene14640_SCG5	secretogranin V
gene14645_ZPBP	zona pellucida binding protein
gene14650_COBL	cordon-bleu WH2 repeat protein
gene14654_AHRR	aryl-hydrocarbon receptor repressor
gene14659_PDE11A	phosphodiesterase 11A
gene1466_NR1D2	nuclear receptor subfamily 1 group D member 2
gene1469_TOP2B	topoisomerase (DNA) II beta
gene14695_KIF17	kinesin family member 17
gene1470_LOC110086857	DNA topoisomerase 2-beta-like
gene14703_GRIN2C	glutamate ionotropic receptor NMDA type subunit 2C
gene14704_TMEM104	transmembrane protein 104
gene14708_RAB37	RAB37
gene14714_DLEC1	deleted in lung and esophageal cancer 1
gene14724_TTC21A	tetratricopeptide repeat domain 21A
gene14729_IFT57	intraflagellar transport 57
gene14735_LOC110085859	T-cell receptor-associated transmembrane adapter 1
gene14736_HJURP	Holliday junction recognition protein
gene14742_GABRA4	gamma-aminobutyric acid type A receptor alpha4 subunit
gene14743_GABRA2	gamma-aminobutyric acid type A receptor alpha2 subunit
gene14744_GABRG1	gamma-aminobutyric acid type A receptor gamma1 subunit
gene14749_TG	thyroglobulin
gene14752_TMEM71	transmembrane protein 71
gene14754_LRRC6	leucine rich repeat containing 6
gene14756_LOC110085890	17-beta-hydroxysteroid dehydrogenase type 6-like
gene14770_AMZ2	archaelysin family metallopeptidase 2
gene14773_MFSD11	major facilitator superfamily domain containing 11
gene14774_SRSF2	serine and arginine rich splicing factor 2
gene14775_METTL23	methyltransferase like 23
gene14778_ST6GALNAC1	ST6 N-acetylgalactosaminide alpha-2
gene14779_ST6GALNAC2	ST6 N-acetylgalactosaminide alpha-2
gene1478_SLC4A7	solute carrier family 4 member 7
gene14782_RHBDF2	rhomboid 5 homolog 2
gene14783_AANAT	aralkylamine N-acetyltransferase
gene1479_EOMES	eomesodermin
gene14798_KATNAL2	katanin catalytic subunit A1 like 2
gene148_FBXO30	F-box protein 30
gene14803_LOXHD1	lipoxygenase homology domains 1
gene14804_RNF165	ring finger protein 165
gene14809_EPG5	ectopic P-granules autophagy protein 5 homolog
gene14816_OSTN	osteocrin
gene14820_CLDN16	claudin 16
gene14826_PROM1	prominin 1
gene1483_ZCWPW2	zinc finger CW-type and PWWP domain containing 2
gene14830_CC2D2A	coiled-coil and C2 domain containing 2A
gene14831_C1QTNF7	C1q and TNF related 7
gene14839_ECM2	extracellular matrix protein 2
gene14842_OGN	osteoglycin
gene14843_NOL8	nucleolar protein 8
gene14847_ATP2B2	ATPase plasma membrane Ca2+ transporting 2
gene14852_LOC110085980	pantothenate kinase 2
gene14860_C1QL3	complement C1q like 3
gene14865_ST8SIA6	ST8 alpha-N-acetyl-neuraminide alpha-2
gene14870_LOC110085997	macrophage mannose receptor 1-like
gene14880_TLK1	tousled like kinase 1
gene14884_DYNC1I2	dynein cytoplasmic 1 intermediate chain 2
gene14885_SLC25A12	solute carrier family 25 member 12
gene14887_HAT1	histone acetyltransferase 1
gene14892_ITGA6	integrin subunit alpha 6
gene14893_PDK1	pyruvate dehydrogenase kinase 1
gene14894_LOC110086016	neurabin-1-like
gene14897_ANGPT4	angiopoietin 4
gene14908_LOC110086039	tyrosine-protein phosphatase non-receptor type substrate 1-like
gene14910_STK35	serine/threonine kinase 35
gene14914_FAM104A	family with sequence similarity 104 member A
gene14930_B3GNT5	UDP-GlcNAc:betaGal beta-1
gene14931_COL15A1	collagen type XV alpha 1 chain
gene14933_RECK	reversion inducing cysteine rich protein with kazal motifs
gene14936_ALG2	ALG2
gene14937_SEC61B	Sec61 translocon beta subunit
gene14939_NR4A3	nuclear receptor subfamily 4 group A member 3
gene1494_KIF25	kinesin family member 25
gene14941_ERP44	endoplasmic reticulum protein 44
gene14948_CAMK2A	calcium/calmodulin dependent protein kinase II alpha
gene1495_AFDN	afadin
gene14950_TCOF1	treacle ribosome biogenesis factor 1
gene14951_CD74	CD74 molecule
gene14961_TRAF3IP1	TRAF3 interacting protein 1
gene1497_TTLL2	tubulin tyrosine ligase like 2
gene14972_ANKEF1	ankyrin repeat and EF-hand domain containing 1
gene14980_DNAJB9	DnaJ heat shock protein family (Hsp40) member B9
gene14983_MRPL3	mitochondrial ribosomal protein L3
gene14986_ATP2C1	ATPase secretory pathway Ca2+ transporting 1
gene14987_PIK3R4	phosphoinositide-3-kinase regulatory subunit 4
gene14992_LOC110086141	histamine N-methyltransferase-like
gene14996_LOC110086143	transcription factor 15-like
gene1500_LOC110087055	uncharacterized LOC110087055
gene15001_LOC110086160	transcription factor E2F2-like
gene15005_YTHDF2	YTH N6-methyladenosine RNA binding protein 2
gene15006_GMEB1	glucocorticoid modulatory element binding protein 1
gene1501_FGFR1OP	FGFR1 oncogene partner
gene1502_RNASET2	ribonuclease T2
gene1503_RPS6KA2	ribosomal protein S6 kinase A2
gene15032_ODF3	outer dense fiber of sperm tails 3
gene15037_BEST1	bestrophin 1
gene15041_FADS1	fatty acid desaturase 1
gene15043_LOC110086190	fatty acid desaturase 1-like
gene15044_LOC110086171	fatty acid desaturase 1-like
gene15046_LOC110086197	fatty acid desaturase 1-like
gene15047_LOC110086173	fatty acid desaturase 1-like
gene1505_SFT2D1	SFT2 domain containing 1
gene1506_LOC110087146	uncharacterized LOC110087146
gene15070_NEURL2	neuralized E3 ubiquitin protein ligase 2
gene15071_CTSA	cathepsin A
gene1508_PDE10A	phosphodiesterase 10A
gene15091_STAG3	stromal antigen 3
gene15096_CPLX1	complexin 1
gene15099_PCGF3	polycomb group ring finger 3
gene15101_DGKQ	diacylglycerol kinase theta
gene15109_SLC8B1	solute carrier family 8 member B1
gene15120_SRRM4	serine/arginine repetitive matrix 4
gene15125_MTMR12	myotubularin related protein 12
gene15129_NPR3	natriuretic peptide receptor 3
gene15139_HFM1	HFM1
gene15145_BRDT	bromodomain testis associated
gene15147_KIAA1107	KIAA1107 ortholog
gene15148_CUNH1orf146	chromosome unknown C1orf146 homolog
gene15149_GLMN	glomulin
gene15152_LOC110086305	protein FAM69A
gene15154_AGL	amylo-alpha-1
gene15170_USO1	USO1 vesicle transport factor
gene15173_CSGALNACT1	chondroitin sulfate N-acetylgalactosaminyltransferase 1
gene15175_BTC	betacellulin
gene1518_MAP3K4	mitogen-activated protein kinase kinase kinase 4
gene15182_EIF2AK3	eukaryotic translation initiation factor 2 alpha kinase 3
gene15187_TTC6	tetratricopeptide repeat domain 6
gene15190_SEC23A	Sec23 homolog A
gene15192_GEMIN2	gem nuclear organelle associated protein 2
gene15194_PNN	pinin
gene15195_LOC110086356	uncharacterized LOC110086356
gene15196_LOC110086358	cTAGE family member 5-like
gene15202_BBOF1	basal body orientation factor 1
gene15205_LOC110086380	zinc-binding protein A33-like
gene15209_LOC110086410	zinc-binding protein A33-like
gene1521_LOC110087406	solute carrier family 22 member 2-like
gene15212_CTF1	cardiotrophin 1
gene15216_FBXL19	F-box and leucine rich repeat protein 19
gene15218_SETD1A	SET domain containing 1A
gene15228_LOC110086404	vitamin K epoxide reductase complex subunit 1-like protein 1
gene15244_LOC110086420	integrin alpha-M-like
gene15250_LOC110086415	carbonic anhydrase 4-like
gene15258_FAM3C	family with sequence similarity 3 member C
gene15284_LOC110086499	serine/threonine-protein kinase SBK1-like
gene15286_LOC110086459	soluble scavenger receptor cysteine-rich domain-containing protein SSC5D-like
gene15289_LOC110086464	serine/threonine-protein kinase SBK2-like
gene153_STX11	syntaxin 11
gene15300_LOC110086455	zinc finger protein 219-like
gene15304_LOC110086448	von Willebrand factor A domain-containing protein 5A-like
gene15306_LOC110086487	serine protease 33-like
gene1531_PNLDC1	PARN like
gene15324_LOC110086504	protein NKG7-like
gene15326_VSIG10L	V-set and immunoglobulin domain containing 10 like
gene1533_TCP1	t-complex 1
gene15356_EFCAB14	EF-hand calcium binding domain 14
gene15358_LOC110086552	cytochrome P450 4B1-like
gene15359_LOC110086551	cytochrome P450 4A4-like
gene15365_STIL	SCL/TAL1 interrupting locus
gene15366_CMPK1	cytidine/uridine monophosphate kinase 1
gene15369_PLXNA2	plexin A2
gene1537_FNDC1	fibronectin type III domain containing 1
gene15374_LOC110086560	complement component receptor 1-like protein
gene15391_LOC110086590	cation channel sperm-associated protein subunit beta-like
gene15393_CCDC88C	coiled-coil domain containing 88C
gene15396_RPS6KA5	ribosomal protein S6 kinase A5
gene15410_LOC110086607	RING finger protein 145-like
gene15412_CPXM1	carboxypeptidase X
gene15416_PCED1A	PC-esterase domain containing 1A
gene15422_FBXO41	F-box protein 41
gene15423_EGR4	early growth response 4
gene15426_TMEM158	transmembrane protein 158
gene15427_CDCP1	CUB domain containing protein 1
gene15431_ZDHHC3	zinc finger DHHC-type containing 3
gene15432_TGM4	transglutaminase 4
gene15434_KIF15	kinesin family member 15
gene15438_TENM1	teneurin transmembrane protein 1
gene15448_LOC110086646	probable G-protein coupled receptor 174
gene1546_TULP4	tubby like protein 4
gene15464_DOCK7	dedicator of cytokinesis 7
gene15469_ALG6	ALG6
gene15476_INHBA	inhibin beta A subunit
gene15479_DUSP19	dual specificity phosphatase 19
gene1548_SERAC1	serine active site containing 1
gene15480_NCKAP1	NCK associated protein 1
gene15482_DNAJC10	DnaJ heat shock protein family (Hsp40) member C10
gene1549_SYNJ2	synaptojanin 2
gene15493_ACSL6	acyl-CoA synthetase long-chain family member 6
gene15494_MEIKIN	meiotic kinetochore factor
gene1550_SNX9	sorting nexin 9
gene15510_MAPK8IP3	mitogen-activated protein kinase 8 interacting protein 3
gene15513_EFCAB8	EF-hand calcium binding domain 8
gene15514_MAPRE1	microtubule associated protein RP/EB family member 1
gene15519_ASXL1	additional sex combs like 1
gene1552_ZDHHC14	zinc finger DHHC-type containing 14
gene15522_POFUT1	protein O-fucosyltransferase 1
gene15524_TM9SF4	transmembrane 9 superfamily member 4
gene15527_XKR7	XK related 7
gene15544_LOC110086761	carcinoembryonic antigen-related cell adhesion molecule 5-like
gene15547_LOC110086759	cornifelin homolog B-like
gene15548_MEGF8	multiple EGF like domains 8
gene15549_TMEM145	transmembrane protein 145
gene1555_NECTIN3	nectin cell adhesion molecule 3
gene15551_LOC110086758	uncharacterized LOC110086758
gene15561_POU2F2	POU class 2 homeobox 2
gene15564_DEDD2	death effector domain containing 2
gene15565_LOC110086746	zinc finger protein 574-like
gene15571_LOC110086762	uncharacterized LOC110086762
gene15572_DMRTC2	DMRT like family C2
gene1558_PHLDB2	pleckstrin homology like domain family B member 2
gene15580_LOC110086801	ATP-binding cassette sub-family G member 2-like
gene15582_TACR2	tachykinin receptor 2
gene15586_VPS26A	VPS26
gene15587_SRGN	serglycin
gene15588_KIF1BP	KIF1 binding protein
gene15594_DNA2	DNA replication helicase/nuclease 2
gene1561_TMPRSS7	transmembrane protease
gene15626_TERB2	telomere repeat binding bouquet formation protein 2
gene15627_TRIM69	tripartite motif containing 69
gene15628_B2M	beta-2-microglobulin
gene15638_LOC110086833	zona pellucida sperm-binding protein 3-like
gene15651_NRG4	neuregulin 4
gene15657_LOC110086874	carbonic anhydrase 3-like
gene15669_OSBPL2	oxysterol binding protein like 2
gene15673_SS18L1	SS18L1
gene15676_TAF4	TATA-box binding protein associated factor 4
gene15680_LOC110086903	uncharacterized LOC110086903
gene15686_CLN6	ceroid-lipofuscinosis
gene15689_SKOR1	SKI family transcriptional corepressor 1
gene1571_EPHA3	EPH receptor A3
gene15710_LOC110086925	ankyrin repeat and fibronectin type-III domain-containing protein 1-like
gene15725_CUNH19orf81	chromosome unknown C19orf81 homolog
gene15729_EMC10	ER membrane protein complex subunit 10
gene1573_PROS1	protein S (alpha)
gene15730_MYBPC2	myosin binding protein C
gene15737_LOC110086942	transient receptor potential cation channel subfamily M member 5-like
gene15743_NEUROD1	neuronal differentiation 1
gene15745_SSFA2	sperm specific antigen 2
gene15749_ZNF512	zinc finger protein 512
gene15751_ASXL2	additional sex combs like 2
gene15763_ABHD1	abhydrolase domain containing 1
gene15766_ATRAID	all-trans retinoic acid induced differentiation factor
gene15774_GTF3C2	general transcription factor IIIC subunit 2
gene15778_LOC110087003	E3 ubiquitin-protein ligase RNF19B-like
gene1578_EPHA6	EPH receptor A6
gene15788_PEX6	peroxisomal biogenesis factor 6
gene1579_ARL6	ADP ribosylation factor like GTPase 6
gene15790_CNPY3	canopy FGF signaling regulator 3
gene15791_PTCRA	pre T-cell antigen receptor alpha
gene1580_CRYBG3	crystallin beta-gamma domain containing 3
gene15800_BCL2L11	BCL2 like 11
gene15802_LOC110087023	two pore calcium channel protein 1-like
gene15807_GABRA1	gamma-aminobutyric acid type A receptor alpha1 subunit
gene15814_LOC110087036	alpha-N-acetylgalactosaminidase-like
gene15816_TXNDC11	thioredoxin domain containing 11
gene15819_GRIN2A	glutamate ionotropic receptor NMDA type subunit 2A
gene15822_TEKT5	tektin 5
gene15831_MYH11	myosin heavy chain 11
gene15833_ABCC1	ATP binding cassette subfamily C member 1
gene15835_LOC110087058	voltage-dependent T-type calcium channel subunit alpha-1H-like
gene15837_TGFB2	transforming growth factor beta 2
gene15840_EPRS	glutamyl-prolyl-tRNA synthetase
gene15844_GINS2	GINS complex subunit 2
gene15855_CCDC88A	coiled-coil domain containing 88A
gene15859_CLHC1	clathrin heavy chain linker domain containing 1
gene15862_EML6	echinoderm microtubule associated protein like 6
gene15865_LOC110087110	fatty acyl-CoA hydrolase precursor
gene15878_ATP13A3	ATPase 13A3
gene15883_ATP13A4	ATPase 13A4
gene15892_LMO3	LIM domain only 3
gene15895_MSS51	MSS51 mitochondrial translational activator
gene15901_LOC110087130	dispanin subfamily A member 2b-like
gene15913_WDR90	WD repeat domain 90
gene1592_POU2F1	POU class 2 homeobox 1
gene15921_SCUBE1	signal peptide
gene15922_TTLL12	tubulin tyrosine ligase like 12
gene15926_TTLL1	tubulin tyrosine ligase like 1
gene15927_PACSIN2	protein kinase C and casein kinase substrate in neurons 2
gene1593_DUSP27	dual specificity phosphatase 27 (putative)
gene15931_PCLO	piccolo presynaptic cytomatrix protein
gene15935_PEAK1	pseudopodium enriched atypical kinase 1
gene15936_TSPAN3	tetraspanin 3
gene15939_LOC110087170	S phase cyclin A-associated protein in the endoplasmic reticulum-like
gene1594_GPA33	glycoprotein A33
gene1595_MAEL	maelstrom spermatogenic transposon silencer
gene15953_KPNA7	karyopherin subunit alpha 7
gene1596_ILDR2	immunoglobulin like domain containing receptor 2
gene15975_SUN1	Sad1 and UNC84 domain containing 1
gene15976_DNAAF5	dynein axonemal assembly factor 5
gene15997_HELLS	helicase
gene16000_COG3	component of oligomeric golgi complex 3
gene16001_ERICH6B	glutamate rich 6B
gene16010_ERCC6	ERCC excision repair 6
gene16012_CUNH10orf71	chromosome unknown C10orf71 homolog
gene16013_LOC110087251	desmocollin-1-like
gene16033_LOC110087267	zinc finger protein 84-like
gene16035_LOC110087273	zinc finger and SCAN domain-containing protein 2-like
gene16043_RRH	retinal pigment epithelium-derived rhodopsin homolog
gene16049_SEC24B	SEC24 homolog B
gene16064_LOC110087294	probable beta-D-xylosidase 2
gene16073_LOC110087303	protein argonaute-4
gene1608_POGLUT1	protein O-glucosyltransferase 1
gene161_ADAT2	adenosine deaminase
gene16100_KLC1	kinesin light chain 1
gene16101_XRCC3	X-ray repair cross complementing 3
gene16107_TBC1D2	TBC1 domain family member 2
gene16108_IKBKAP	inhibitor of kappa light polypeptide gene enhancer in B-cells
gene16110_APTX	aprataxin
gene16117_TEX15	testis expressed 15
gene16119_WRN	Werner syndrome RecQ like helicase
gene16126_TMX4	thioredoxin related transmembrane protein 4
gene16135_ADORA2B	adenosine A2b receptor
gene16136_ZSWIM7	zinc finger SWIM-type containing 7
gene16141_UBC	ubiquitin C
gene16144_TRPV2	transient receptor potential cation channel subfamily V member 2
gene16145_LOC110087408	uncharacterized LOC110087408
gene16146_LOC110087409	integrin alpha-E-like
gene1615_GPR89B	G protein-coupled receptor 89B
gene16152_SHPK	sedoheptulokinase
gene16155_TRPV3	transient receptor potential cation channel subfamily V member 3
gene16157_SPATA22	spermatogenesis associated 22
gene16160_AKAP10	A-kinase anchoring protein 10
gene16164_LOC110087384	fatty aldehyde dehydrogenase-like
gene16165_LOC110087411	multidrug and toxin extrusion protein 2-like
gene16166_SLC47A1	solute carrier family 47 member 1
gene16176_LOC110087417	inactive serine/threonine-protein kinase TEX14-like
gene16179_C5	complement C5
gene16188_CAMSAP1	calmodulin regulated spectrin associated protein 1
gene16192_LOC110087426	P2Y purinoceptor 2-like
gene16194_LOC110087436	fatty acyl-CoA hydrolase precursor
gene16196_BSPRY	B-box and SPRY domain containing
gene16197_HDHD3	haloacid dehalogenase like hydrolase domain containing 3
gene16206_LOC110087453	uncharacterized LOC110087453
gene16207_LOC110087454	uncharacterized LOC110087454
gene16215_TUBB4B	tubulin beta 4B class IVb
gene16217_EXD3	exonuclease 3'-5' domain containing 3
gene16222_CUNH9orf172	chromosome unknown C9orf172 homolog
gene16224_MAMDC4	MAM domain containing 4
gene1623_PENK	proenkephalin
gene16232_LOC110087485	serine/threonine-protein kinase ULK4-like
gene16237_ADARB1	adenosine deaminase
gene16238_ITGB2	integrin subunit beta 2
gene16246_FGF23	fibroblast growth factor 23
gene16255_GABRB2	gamma-aminobutyric acid type A receptor beta2 subunit
gene16256_ATP10B	ATPase phospholipid transporting 10B (putative)
gene16259_C1QTNF2	C1q and TNF related 2
gene16268_JUNB	JunB proto-oncogene
gene163_HIVEP2	human immunodeficiency virus type I enhancer binding protein 2
gene16300_CDC42BPA	CDC42 binding protein kinase alpha
gene16304_STUM	stum
gene16309_PIWIL4	piwi like RNA-mediated gene silencing 4
gene16316_MTMR2	myotubularin related protein 2
gene16323_KCNQ2	potassium voltage-gated channel subfamily Q member 2
gene16332_LOC110087593	teneurin-4-like
gene16337_LOC110087603	plasma membrane calcium-transporting ATPase 1-like
gene16355_DLG5	discs large MAGUK scaffold protein 5
gene16357_LOC110087617	calcium-activated potassium channel subunit alpha-1-like
gene16362_CCDC39	coiled-coil domain containing 39
gene16363_TTC14	tetratricopeptide repeat domain 14
gene1637_CLVS1	clavesin 1
gene16370_RAB2B	RAB2B
gene16382_LOC110087640	histone H2B 1/2/3/4/6-like
gene1639_ASPH	aspartate beta-hydroxylase
gene164_ADGRG6	adhesion G protein-coupled receptor G6
gene1642_GGH	gamma-glutamyl hydrolase
gene16429_SLC25A35	solute carrier family 25 member 35
gene1643_TTPA	alpha tocopherol transfer protein
gene16434_LOC110087661	alpha-2
gene16435_LOC110087631	alpha-2
gene16437_LOC110087628	type-2 ice-structuring protein-like
gene1645_YTHDF3	YTH N6-methyladenosine RNA binding protein 3
gene16458_UBE3A	ubiquitin protein ligase E3A
gene16459_CNGA3	cyclic nucleotide gated channel alpha 3
gene1646_BHLHE22	basic helix-loop-helix family member e22
gene16461_TMEM131	transmembrane protein 131
gene16462_LOC110087733	inosine-uridine preferring nucleoside hydrolase-like
gene16471_GUCY2D	guanylate cyclase 2D
gene16472_CNTROB	centrobin
gene16479_KDM6B	lysine demethylase 6B
gene16497_LOC110087768	protein HP-25 homolog 1-like
gene16499_WDFY4	WDFY family member 4
gene16510_LOC110087776	WASH complex subunit 2-like
gene16511_ZFAND4	zinc finger AN1-type containing 4
gene16512_LOC110087782	cilia- and flagella-associated protein 99-like
gene16532_MMP14	matrix metallopeptidase 14
gene16542_CDH24	cadherin 24
gene16546_RNF212B	ring finger protein 212B
gene16548_LOC110087803	twisted gastrulation protein homolog 1-B-like
gene16561_LOC110087824	uncharacterized LOC110087824
gene16562_JPH4	junctophilin 4
gene16574_THADA	THADA
gene16579_PPP2R5E	protein phosphatase 2 regulatory subunit B'epsilon
gene1658_CRH	corticotropin releasing hormone
gene16582_SGPP1	sphingosine-1-phosphate phosphatase 1
gene16591_CUNH15orf41	chromosome unknown C15orf41 homolog
gene16602_ALCAM	activated leukocyte cell adhesion molecule
gene16608_MTA3	metastasis associated 1 family member 3
gene16611_TTLL6	tubulin tyrosine ligase like 6
gene16619_HOXB5	homeobox B5
gene1662_RRS1	ribosome biogenesis regulator homolog
gene16632_ANKLE2	ankyrin repeat and LEM domain containing 2
gene16640_LOC110087929	neuroligin-1
gene16642_USH2A	usherin
gene16647_CUNH2orf73	chromosome unknown C2orf73 homolog
gene16649_PSME4	proteasome activator subunit 4
gene1665_MYBL1	MYB proto-oncogene like 1
gene16650_GPR75	G protein-coupled receptor 75
gene16662_MYOZ3	myozenin 3
gene16669_LOC110087957	platelet-derived growth factor receptor-like protein
gene16673_GM2A	GM2 ganglioside activator
gene16674_LOC110087968	proton-coupled amino acid transporter 1-like
gene16676_FAT2	FAT atypical cadherin 2
gene16677_SPARC	secreted protein acidic and cysteine rich
gene1668_LOC110089237	serine/threonine-protein kinase Sgk3
gene16688_SLC6A17	solute carrier family 6 member 17
gene1669_MCMDC2	minichromosome maintenance domain containing 2
gene16694_LOC110087983	adhesion G protein-coupled receptor E3-like
gene16696_KCNA10	potassium voltage-gated channel subfamily A member 10
gene16704_IQCH	IQ motif containing H
gene16710_PODXL	podocalyxin like
gene16715_LOC110088007	sperm acrosome membrane-associated protein 1-like
gene16721_REP15	RAB15 effector protein
gene16722_PPFIBP1	PPFIA binding protein 1
gene16724_LOC110088017	cadherin-4
gene16728_LOC110088039	zinc finger protein RFP-like
gene16730_LOC110088031	zinc finger protein RFP-like
gene16731_LOC110088062	tripartite motif-containing protein 15-like
gene16733_LOC110088038	tripartite motif-containing protein 7-like
gene16743_LOC110088021	L-amino-acid oxidase-like
gene16749_LOC110088059	histone H2B.5-like
gene1675_CSPP1	centrosome and spindle pole associated protein 1
gene16758_HDAC11	histone deacetylase 11
gene1676_ARFGEF1	ADP ribosylation factor guanine nucleotide exchange factor 1
gene16769_LOC110088035	zinc finger protein 436-like
gene16771_LOC110088056	1-acyl-sn-glycerol-3-phosphate acyltransferase alpha-like
gene16773_CCDC105	coiled-coil domain containing 105
gene16775_LOC110088083	uncharacterized LOC110088083
gene16777_CACNA1I	calcium voltage-gated channel subunit alpha1 I
gene16779_ATF4	activating transcription factor 4
gene1678_PREX2	phosphatidylinositol-3
gene16786_DCAF4	DDB1 and CUL4 associated factor 4
gene16788_RBM25	RNA binding motif protein 25
gene16789_PSEN1	presenilin 1
gene1679_CUNH8orf34	chromosome unknown C8orf34 homolog
gene16791_NUMB	NUMB
gene16792_HEATR4	HEAT repeat containing 4
gene16795_LOC110088095	acyl-coenzyme A thioesterase 1-like
gene16799_TMEM62	transmembrane protein 62
gene1680_SULF1	sulfatase 1
gene1681_SLCO5A1	solute carrier organic anion transporter family member 5A1
gene16816_PIAS3	protein inhibitor of activated STAT 3
gene16819_LOC110088136	V-set and immunoglobulin domain-containing protein 2-like
gene1682_PRDM14	PR/SET domain 14
gene16837_NCSTN	nicastrin
gene16839_LOC110088141	protein FAM71B-like
gene1685_TRAM1	translocation associated membrane protein 1
gene16850_CFAP100	cilia and flagella associated protein 100
gene16861_SLC9A6	solute carrier family 9 member A6
gene16863_MAP7D3	MAP7 domain containing 3
gene16873_NBEAL1	neurobeachin like 1
gene16877_ICA1L	islet cell autoantigen 1 like
gene16890_EDEM1	ER degradation enhancing alpha-mannosidase like protein 1
gene16891_ARL8B	ADP ribosylation factor like GTPase 8B
gene16893_BHLHE40	basic helix-loop-helix family member e40
gene16894_ITPR1	inositol 1
gene16895_SUMF1	sulfatase modifying factor 1
gene16898_GLDC	glycine decarboxylase
gene1690_TRPA1	transient receptor potential cation channel subfamily A member 1
gene16900_KIAA2026	KIAA2026 ortholog
gene16902_ERMP1	endoplasmic reticulum metallopeptidase 1
gene1691_KCNB2	potassium voltage-gated channel subfamily B member 2
gene16911_LOC110088228	connector enhancer of kinase suppressor of ras 2-like
gene16913_RPS6KA6	ribosomal protein S6 kinase A6
gene1693_SBSPON	somatomedin B and thrombospondin type 1 domain containing
gene16934_TMEM168	transmembrane protein 168
gene16937_GPR85	G protein-coupled receptor 85
gene16944_LOC110088257	arachidonate 12-lipoxygenase
gene16963_PER1	period circadian clock 1
gene16965_LOC110088284	histone H3-like
gene1697_RDH10	retinol dehydrogenase 10
gene1699_UBE2W	ubiquitin conjugating enzyme E2 W
gene16991_LOC110088293	magnesium-dependent phosphatase 1-like
gene16994_TM9SF1	transmembrane 9 superfamily member 1
gene16998_RNF31	ring finger protein 31
gene17020_CTPS1	CTP synthase 1
gene17034_BOD1L1	biorientation of chromosomes in cell division 1 like 1
gene17036_LOC110088368	sulfotransferase 1 family member D1-like
gene17037_LOC110088372	sulfotransferase 1C1-like
gene17045_LOC110088379	glycine-rich cell wall structural protein 2-like
gene17046_LOC110088380	claudin-9-like
gene17047_LOC110088384	claudin-4-like
gene17051_LOC110088357	serine protease 30-like
gene17052_LOC110088365	prostasin-like
gene1706_DNAI2	dynein axonemal intermediate chain 2
gene17065_TFPI	tissue factor pathway inhibitor
gene17067_ZSWIM2	zinc finger SWIM-type containing 2
gene17068_FAM171B	family with sequence similarity 171 member B
gene17073_NSDHL	NAD(P) dependent steroid dehydrogenase-like
gene17081_IKBKE	inhibitor of nuclear factor kappa B kinase subunit epsilon
gene17096_CD164L2	CD164 molecule like 2
gene17102_LOC110088427	transducin-like enhancer protein 1
gene17103_LOC110088436	coiled-coil domain-containing protein 92
gene17108_MNT	MAX network transcriptional repressor
gene1711_CCDC137	coiled-coil domain containing 137
gene17129_NUP210L	nucleoporin 210 like
gene17135_CREB3L4	cAMP responsive element binding protein 3 like 4
gene17137_CRTC2	CREB regulated transcription coactivator 2
gene17167_NT5DC1	5'-nucleotidase domain containing 1
gene17171_FAM26F	family with sequence similarity 26 member F
gene17188_CLASRP	CLK4 associating serine/arginine rich protein
gene17189_RELB	RELB proto-oncogene
gene17190_CLPTM1	CLPTM1
gene17199_B3GNT8	UDP-GlcNAc:betaGal beta-1
gene17201_PRSS16	protease
gene17209_SPTY2D1	SPT2 chromatin protein domain containing 1
gene17215_HPS5	HPS5
gene17218_GDPD4	glycerophosphodiester phosphodiesterase domain containing 4
gene1722_SLC38A10	solute carrier family 38 member 10
gene17222_AQP11	aquaporin 11
gene17237_GRM5	glutamate metabotropic receptor 5
gene1724_TEPSIN	TEPSIN
gene17243_LOC110088588	dynein heavy chain 11
gene17250_TMEM208	transmembrane protein 208
gene17252_ELMO3	engulfment and cell motility 3
gene17261_SLCO3A1	solute carrier organic anion transporter family member 3A1
gene17270_XIAP	X-linked inhibitor of apoptosis
gene17271_THOC2	THO complex 2
gene17286_CFAP53	cilia and flagella associated protein 53
gene17287_LOC110088639	tetraspanin-3-like
gene17290_ME2	malic enzyme 2
gene17296_TNFRSF19	TNF receptor superfamily member 19
gene17301_LOC110088645	myotubularin-related protein 6-like
gene17305_CCDC116	coiled-coil domain containing 116
gene17306_SDF2L1	stromal cell derived factor 2 like 1
gene17307_TOP3B	topoisomerase (DNA) III beta
gene17314_PLK2	polo like kinase 2
gene17315_LOC110088666	ras-related protein Rab-3C
gene17319_PDIA4	protein disulfide isomerase family A member 4
gene17329_LOC110088682	ferritin heavy chain B-like
gene17334_SLC44A4	solute carrier family 44 member 4
gene17335_EHMT2	euchromatic histone lysine methyltransferase 2
gene17337_C2	complement C2
gene17338_CFB	complement factor B
gene17343_NEU1	neuraminidase 1
gene17351_LOC110088688	natural cytotoxicity triggering receptor 3-like
gene1736_SLC26A11	solute carrier family 26 member 11
gene17367_JAKMIP1	janus kinase and microtubule interacting protein 1
gene17368_WFS1	wolframin ER transmembrane glycoprotein
gene17379_HUS1	HUS1 checkpoint clamp component
gene17396_KBTBD2	kelch repeat and BTB domain containing 2
gene17397_LOC110088756	uncharacterized LOC110088756
gene1740_CCDC40	coiled-coil domain containing 40
gene17400_LOC110088761	protein PTHB1-like
gene17410_STYX	serine/threonine/tyrosine interacting protein
gene17418_SNRPB2	small nuclear ribonucleoprotein polypeptide B2
gene17425_FBXO48	F-box protein 48
gene17431_SLCO1A2	solute carrier organic anion transporter family member 1A2
gene17436_LOC110088807	ferritin
gene17437_OTOG	otogelin
gene17447_WBSCR17	Williams-Beuren syndrome chromosome region 17
gene17451_LOC110088830	perilipin-3-like
gene17454_BPGM	bisphosphoglycerate mutase
gene17456_LOC110088828	perilipin-3-like
gene17462_EML5	echinoderm microtubule associated protein like 5
gene17465_PTPN21	protein tyrosine phosphatase
gene17470_GHRHR	growth hormone releasing hormone receptor
gene17481_LOC110088858	uncharacterized LOC110088858
gene17485_GFOD2	glucose-fructose oxidoreductase domain containing 2
gene17488_TSNAXIP1	translin associated factor X interacting protein 1
gene175_ECT2L	epithelial cell transforming 2 like
gene17503_LOC110088877	solute carrier family 12 member 9-like
gene17510_GULP1	GULP
gene17518_LOC110088904	anionic trypsin-1-like
gene1752_LGALS3BP	galectin 3 binding protein
gene17521_LOC110088899	transient receptor potential cation channel subfamily V member 6-like
gene17522_LOC110088905	transient receptor potential cation channel subfamily V member 6-like
gene17529_GTF2A1L	general transcription factor IIA subunit 1 like
gene17531_NRGN	neurogranin
gene17532_SPA17	sperm autoantigenic protein 17
gene17533_SIAE	sialic acid acetylesterase
gene1754_USP36	ubiquitin specific peptidase 36
gene17545_SYTL2	synaptotagmin like 2
gene1755_CYTH1	cytohesin 1
gene17554_ADIPOQ	adiponectin
gene1756_DNAH17	dynein axonemal heavy chain 17
gene17568_CIT	citron rho-interacting serine/threonine kinase
gene17574_GCN1	GCN1
gene17578_UBA6	ubiquitin like modifier activating enzyme 6
gene1758_SOCS3	suppressor of cytokine signaling 3
gene17585_PATL2	PAT1 homolog 2
gene17592_CEP78	centrosomal protein 78
gene17595_PFKFB3	6-phosphofructo-2-kinase/fructose-2
gene17596_LOC110088967	protein kinase C theta type-like
gene17597_EFCAB3	EF-hand calcium binding domain 3
gene17606_ACLY	ATP citrate lyase
gene17609_STRA8	stimulated by retinoic acid 8
gene17612_CNOT4	CCR4-NOT transcription complex subunit 4
gene17618_LOC110089002	sodium-coupled monocarboxylate transporter 1-like
gene1762_AFMID	arylformamidase
gene17624_ALS2CR12	amyotrophic lateral sclerosis 2 chromosome region 12
gene17635_LOC110089018	aldehyde oxidase 2-like
gene17636_AOX1	aldehyde oxidase 1
gene17637_SGO2	shugoshin 2
gene1764_SYNGR2	synaptogyrin 2
gene17648_LOC110089040	zinc finger protein 318-like
gene17649_ABCC10	ATP binding cassette subfamily C member 10
gene17651_LOC110089036	zinc finger protein 318-like
gene17654_LOC110089038	latent-transforming growth factor beta-binding protein 1-like
gene17660_TOP1MT	topoisomerase (DNA) I
gene17671_DYNC2H1	dynein cytoplasmic 2 heavy chain 1
gene17674_LOC110089074	stromelysin-1-like
gene17687_LSR	lipolysis stimulated lipoprotein receptor
gene17689_MAG	myelin associated glycoprotein
gene1769_LOC110090537	UPF0585 protein C16orf13 homolog B-like
gene17696_LOC110089097	gilatoxin-like
gene17698_LOC110089082	zinc finger and SCAN domain-containing protein 20-like
gene17701_SCN1B	sodium voltage-gated channel beta subunit 1
gene17703_CLCN7	chloride voltage-gated channel 7
gene17730_KIAA0556	KIAA0556 ortholog
gene17733_RHBDF1	rhomboid 5 homolog 1
gene17754_ATP5S	ATP synthase
gene17759_ARF6	ADP ribosylation factor 6
gene17762_KLHDC1	kelch domain containing 1
gene17779_MMS19	MMS19 homolog
gene1779_ANAPC11	anaphase promoting complex subunit 11
gene17800_P2RY11	purinergic receptor P2Y11
gene17802_DNMT1	DNA methyltransferase 1
gene17804_SEMA3E	semaphorin 3E
gene17805_LOC110089209	neurexin-1-like
gene17811_KSR2	kinase suppressor of ras 2
gene17840_DCC	DCC netrin 1 receptor
gene17842_POLI	DNA polymerase iota
gene17845_LOC110089251	gonadotropin-releasing hormone II receptor-like
gene17846_CILP	cartilage intermediate layer protein
gene17853_CLPX	caseinolytic mitochondrial matrix peptidase chaperone subunit
gene17859_LOC110089266	calpain-13-like
gene1786_NOTUM	NOTUM
gene17862_EIF3J	eukaryotic translation initiation factor 3 subunit J
gene17864_CASC4	cancer susceptibility 4
gene17872_NUP153	nucleoporin 153
gene17888_ADAMTSL2	ADAMTS like 2
gene17893_FAM177A1	family with sequence similarity 177 member A1
gene17896_BAZ1A	bromodomain adjacent to zinc finger domain 1A
gene17915_LOC110089325	cholinesterase-like
gene17916_LOC110089316	cholinesterase-like
gene17925_LZTS1	leucine zipper tumor suppressor 1
gene17929_TTI2	TELO2 interacting protein 2
gene17938_CUNH14orf80	chromosome unknown C14orf80 homolog
gene17949_SERINC2	serine incorporator 2
gene17954_C1QB	complement C1q B chain
gene17955_C1QC	complement C1q C chain
gene17956_C1QA	complement C1q A chain
gene17958_LOC110089380	protein ABHD16B-like
gene17966_ZNF512B	zinc finger protein 512B
gene17968_FNDC11	fibronectin type III domain containing 11
gene17969_HELZ2	helicase with zinc finger 2
gene17973_LOC110089388	regulator of telomere elongation helicase 1-like
gene17977_LOC110089395	uncharacterized LOC110089395
gene1798_CCDC57	coiled-coil domain containing 57
gene17987_CALU	calumenin
gene1799_SLC16A3	solute carrier family 16 member 3
gene17991_FLNC	filamin C
gene18004_WDR24	WD repeat domain 24
gene18013_NLRC3	NLR family CARD domain containing 3
gene18017_LOC110089445	carcinoembryonic antigen-related cell adhesion molecule 6-like
gene18039_APOE	apolipoprotein E
gene18051_LOC110089474	vitellogenin-1-like
gene18056_LOC110089479	transcription factor COE2
gene18057_KCNH7	potassium voltage-gated channel subfamily H member 7
gene1807_TOB1	transducer of ERBB2
gene18075_FZD3	frizzled class receptor 3
gene18078_KBTBD8	kelch repeat and BTB domain containing 8
gene18081_LOC110089506	mucin-5B-like
gene18083_LOC110089507	mucin-5B-like
gene18084_LOC110089509	mucin-2-like
gene18087_TSHR	thyroid stimulating hormone receptor
gene18088_CEP128	centrosomal protein 128
gene18092_LOC110089523	C-factor-like
gene181_PERP	PERP
gene1810_LUC7L3	LUC7 like 3 pre-mRNA splicing factor
gene18100_RHPN2	rhophilin Rho GTPase binding protein 2
gene18104_FAM208B	family with sequence similarity 208 member B
gene18116_LOC110089530	interferon-induced protein with tetratricopeptide repeats 1-like
gene1813_CACNA1G	calcium voltage-gated channel subunit alpha1 G
gene18132_PARP2	poly(ADP-ribose) polymerase 2
gene18135_LOC110089566	solute carrier family 12 member 3-like
gene18136_OSGEP	O-sialoglycoprotein endopeptidase
gene18141_PNP	purine nucleoside phosphorylase
gene18146_RNASE12	ribonuclease A family member 12 (inactive)
gene18147_LOC110089559	C-type lectin BpLec-like
gene18150_LOC110089576	C-type lectin BpLec-like
gene18156_LOC110089569	angiogenin-like
gene18163_EFR3B	EFR3 homolog B
gene18166_LOC110089602	cystatin-like
gene1818_RSAD1	radical S-adenosyl methionine domain containing 1
gene18183_PLAUR	plasminogen activator
gene1819_ACSF2	acyl-CoA synthetase family member 2
gene18191_LOC110089624	phospholipase A2 inhibitor and Ly6/PLAUR domain-containing protein-like
gene18196_RMI1	RecQ mediated genome instability 1
gene18199_CUNH9orf64	chromosome unknown C9orf64 homolog
gene18200_KIF27	kinesin family member 27
gene18201_GKAP1	G kinase anchoring protein 1
gene18203_IDNK	IDNK
gene18204_FRMD3	FERM domain containing 3
gene18208_MLC1	megalencephalic leukoencephalopathy with subcortical cysts 1
gene18209_MOV10L1	Mov10 RISC complex RNA helicase like 1
gene18210_PANX2	pannexin 2
gene18226_HHIPL1	HHIP like 1
gene18229_SETD3	SET domain containing 3
gene1823_CFAP54	cilia and flagella associated protein 54
gene18231_HTR1D	5-hydroxytryptamine receptor 1D
gene18234_ZMPSTE24	zinc metallopeptidase STE24
gene18235_RLF	rearranged L-myc fusion
gene18240_LOC110089675	interleukin-20 receptor subunit beta-like
gene18242_KCNT2	potassium sodium-activated channel subfamily T member 2
gene18245_NCDN	neurochondrin
gene18246_KIAA0319L	KIAA0319 like
gene18250_KCNQ4	potassium voltage-gated channel subfamily Q member 4
gene18263_LOC110089707	transmembrane protein 68-like
gene18267_LOC110089708	transmembrane protein 68-like
gene18276_ERI1	exoribonuclease 1
gene18285_ORC5	origin recognition complex subunit 5
gene18297_SAMD4A	sterile alpha motif domain containing 4A
gene18299_GMFB	glia maturation factor beta
gene1830_CCDC38	coiled-coil domain containing 38
gene18305_LOC110089749	cytokine receptor-like factor 2
gene18306_LOC110089754	granulocyte-macrophage colony-stimulating factor receptor subunit alpha-like
gene18309_P2RY8	purinergic receptor P2Y8
gene1831_SNRPF	small nuclear ribonucleoprotein polypeptide F
gene18332_PIK3CG	phosphatidylinositol-4
gene18335_COG5	component of oligomeric golgi complex 5
gene18338_SLC26A4	solute carrier family 26 member 4
gene18340_DUS4L	dihydrouridine synthase 4 like
gene18341_CBLL1	Cbl proto-oncogene like 1
gene18343_CACNA1B	calcium voltage-gated channel subunit alpha1 B
gene18347_LOC110089815	major facilitator superfamily domain-containing protein 1-like
gene18360_ATP6V0C	ATPase H+ transporting V0 subunit c
gene18366_CHRD	chordin
gene1837_LOC110091535	uncharacterized protein C3orf20-like
gene18371_PLPP6	phospholipid phosphatase 6
gene1838_VEZT	vezatin
gene18387_IFT122	intraflagellar transport 122
gene18389_SLC38A6	solute carrier family 38 member 6
gene18392_SIX4	SIX homeobox 4
gene18393_SIX1	SIX homeobox 1
gene18395_UACA	uveal autoantigen with coiled-coil domains and ankyrin repeats
gene18397_ADAMTS7	ADAM metallopeptidase with thrombospondin type 1 motif 7
gene18399_QRICH2	glutamine rich 2
gene18401_RNF157	ring finger protein 157
gene18404_ZACN	zinc activated ion channel
gene18416_AKNA	AT-hook transcription factor
gene1842_TMCC3	transmembrane and coiled-coil domain family 3
gene18420_LOC110089873	vegetative cell wall protein gp1-like
gene18432_NTRK2	neurotrophic receptor tyrosine kinase 2
gene18437_PROSER3	proline and serine rich 3
gene18441_KMT2B	lysine methyltransferase 2B
gene18443_OTOP1	otopetrin 1
gene1845_CRADD	CASP2 and RIPK1 domain containing adaptor with death domain
gene18473_LOC110089936	uncharacterized LOC110089936
gene18484_TSGA10IP	testis specific 10 interacting protein
gene18486_ACTN3	actinin alpha 3
gene18487_RCE1	Ras converting CAAX endopeptidase 1
gene18488_CUNH11orf80	chromosome unknown C11orf80 homolog
gene18494_CCDC87	coiled-coil domain containing 87
gene1850_EEA1	early endosome antigen 1
gene18505_LTBP3	latent transforming growth factor beta binding protein 3
gene18509_COL13A1	collagen type XIII alpha 1 chain
gene1851_PLEKHG7	pleckstrin homology and RhoGEF domain containing G7
gene18512_CHST3	carbohydrate sulfotransferase 3
gene18515_ATP1B4	ATPase Na+/K+ transporting family member beta 4
gene18516_LAMP2	lysosomal associated membrane protein 2
gene18519_C1GALT1C1	C1GALT1 specific chaperone 1
gene18520_SCMH1	sex comb on midleg homolog 1 (Drosophila)
gene18523_ITGAV	integrin subunit alpha V
gene18526_BTBD3	BTB domain containing 3
gene18538_SNAPC1	small nuclear RNA activating complex polypeptide 1
gene18547_SUPT20H	SPT20 homolog
gene18549_TRPC4	transient receptor potential cation channel subfamily C member 4
gene18552_BIRC7	baculoviral IAP repeat containing 7
gene18558_CEP170B	centrosomal protein 170B
gene1856_LUM	lumican
gene18564_MYO5B	myosin VB
gene18569_CUNH18orf32	chromosome unknown C18orf32 homolog
gene18572_ABCC5	ATP binding cassette subfamily C member 5
gene18578_LOC110090053	cytochrome P450 2B12-like
gene18581_LOC110090061	matrix metalloproteinase-25-like
gene18584_LOC110090079	sesquipedalian-1-like
gene1859_ATP2B1	ATPase plasma membrane Ca2+ transporting 1
gene18591_LOC110090084	uncharacterized LOC110090084
gene18594_PRR14	proline rich 14
gene18595_FBRS	fibrosin
gene18597_TMEM265	transmembrane protein 265
gene186_SLC35D3	solute carrier family 35 member D3
gene1860_POC1B	POC1 centriolar protein B
gene18602_LOC110090082	zinc finger and SCAN domain-containing protein 22-like
gene18616_LOC110090108	RIMS-binding protein 2-like
gene18618_RNFT2	ring finger protein
gene18627_SLC12A8	solute carrier family 12 member 8
gene1863_TMTC3	transmembrane and tetratricopeptide repeat containing 3
gene18634_LOC110090121	macrophage mannose receptor 1-like
gene18636_CACNB2	calcium voltage-gated channel auxiliary subunit beta 2
gene18637_NSUN6	NOP2/Sun RNA methyltransferase family member 6
gene18638_ARL5B	ADP ribosylation factor like GTPase 5B
gene1864_CEP290	centrosomal protein 290
gene18643_GDF9	growth differentiation factor 9
gene18647_SEPT8	septin 8
gene18649_KIF3A	kinesin family member 3A
gene1865_CUNH12orf29	chromosome unknown C12orf29 homolog
gene18651_LOC110090142	homeobox protein SIX6
gene18652_CUNH14orf39	chromosome unknown C14orf39 homolog
gene18655_PCNX4	pecanex homolog 4 (Drosophila)
gene18656_LOC110090147	leucine-rich repeat-containing protein 9-like
gene18659_MAP4K4	mitogen-activated protein kinase kinase kinase kinase 4
gene1866_CUNH12orf50	chromosome unknown C12orf50 homolog
gene18660_IL1R2	interleukin 1 receptor type 2
gene18662_LOC110090155	interleukin-1 receptor-like 2
gene18666_SYNE3	spectrin repeat containing nuclear envelope family member 3
gene18670_LOC110090159	C-type lectin domain family 2 member L-like
gene18671_IER3	immediate early response 3
gene1868_MGAT4C	MGAT4 family member C
gene18698_TNFSF14	TNF superfamily member 14
gene18701_LOC110090191	uncharacterized LOC110090191
gene18707_GOLT1B	golgi transport 1B
gene18712_CUNH8orf88	chromosome unknown C8orf88 homolog
gene18713_TMEM55A	transmembrane protein 55A
gene18717_SLC26A7	solute carrier family 26 member 7
gene1872_LRRIQ1	leucine rich repeats and IQ motif containing 1
gene18724_BCAN	brevican
gene18735_OSGIN2	oxidative stress induced growth inhibitor family member 2
gene18736_NBN	nibrin
gene18746_FBXO9	F-box protein 9
gene18758_UPF3B	UPF3 regulator of nonsense transcripts homolog B (yeast)
gene18774_LOC110090279	uncharacterized LOC110090279
gene18777_LOC110090287	uncharacterized LOC110090287
gene18784_LOC110090282	C-type lectin domain family 2 member D6-like
gene18785_LOC110090272	C-type lectin domain family 1 member A-like
gene1879_LOC110070235	acyl-CoA synthetase short-chain family member 3
gene18790_LOC110090274	condensin-2 complex subunit H2-like
gene18791_LOC110090298	keratin
gene18792_LOC110090297	keratin
gene18798_LOC110090292	keratin
gene1880_ITGB7	integrin subunit beta 7
gene18807_LOC110090305	circadian locomoter output cycles protein kaput-like
gene18808_TBC1D8B	TBC1 domain family member 8B
gene18809_RNF128	ring finger protein 128
gene18810_CUNHXorf57	chromosome unknown CXorf57 homolog
gene18813_C2CD5	C2 calcium dependent domain containing 5
gene18814_ETNK1	ethanolamine kinase 1
gene18817_LOC110090318	intestinal-type alkaline phosphatase 1-like
gene18819_RALGPS2	Ral GEF with PH domain and SH3 binding motif 2
gene18823_RASD1	ras related dexamethasone induced 1
gene18827_TOM1L2	target of myb1 like 2 membrane trafficking protein
gene18829_CDH11	cadherin 11
gene1883_MFSD5	major facilitator superfamily domain containing 5
gene18830_LOC110090331	zona pellucida-binding protein 1-like
gene18835_FAM20C	FAM20C
gene18899_LOC110090346	zinc finger protein 397-like
gene18900_LOC110090348	zinc finger and SCAN domain-containing protein 23-like
gene18919_LOC110090343	uncharacterized LOC110090343
gene1892_SENP1	SUMO1/sentrin specific peptidase 1
gene18926_ZNF598	zinc finger protein 598
gene18934_LOC110090447	testis-expressed protein 2-like
gene18936_LOC110090446	uncharacterized LOC110090446
gene18942_LOC110090449	tenascin-like
gene18943_HEPACAM	hepatic and glial cell adhesion molecule
gene18944_CCDC15	coiled-coil domain containing 15
gene18948_LOC110090457	serine palmitoyltransferase 3-like
gene18952_LOC110090466	#N/A
gene18954_LOC110090464	mitochondrial inner membrane protein COX18
gene18955_ANKRD17	ankyrin repeat domain 17
gene18961_MTHFD2L	methylenetetrahydrofolate dehydrogenase (NADP+ dependent) 2-like
gene18966_LOC110090484	C-type lectin domain family 2 member H-like
gene18967_LOC110090481	killer cell lectin-like receptor subfamily B member 1B allele C
gene18976_LOC110090490	protocadherin Fat 3-like
gene190_MAP7	microtubule associated protein 7
gene19002_LOC110090519	protein FAM189A2-like
gene19003_APBA1	amyloid beta precursor protein binding family A member 1
gene19023_RAB10	RAB10
gene19028_ESCO2	establishment of sister chromatid cohesion N-acetyltransferase 2
gene19032_CLU	clusterin
gene19035_EML1	echinoderm microtubule associated protein like 1
gene19036_LOC110090557	myosin-7-like
gene19044_ZNF341	zinc finger protein 341
gene19047_SLC9A3	solute carrier family 9 member A3
gene19050_SDHA	succinate dehydrogenase complex flavoprotein subunit A
gene19058_CUNH1orf112	chromosome unknown C1orf112 homolog
gene19065_GRIN3B	glutamate ionotropic receptor NMDA type subunit 3B
gene19070_LOC110090585	actin-like protein 9
gene19072_SUGP1	SURP and G-patch domain containing 1
gene19073_TM6SF2	transmembrane 6 superfamily member 2
gene19075_NCAN	neurocan
gene19078_SLC35A2	solute carrier family 35 member A2
gene19086_PCSK1N	proprotein convertase subtilisin/kexin type 1 inhibitor
gene19090_PRICKLE3	prickle planar cell polarity protein 3
gene19092_WRNIP1	Werner helicase interacting protein 1
gene19105_LOC110090630	zinc finger protein 665-like
gene19112_LOC110090643	zinc finger protein 501-like
gene19114_LOC110090644	tripartite motif-containing protein 10-like
gene19128_CKLF	chemokine like factor
gene19133_TERB1	telomere repeat binding bouquet formation protein 1
gene19134_NAE1	NEDD8 activating enzyme E1 subunit 1
gene19135_PDP2	pyruvate dehyrogenase phosphatase catalytic subunit 2
gene19144_PPP4R4	protein phosphatase 4 regulatory subunit 4
gene1916_R3HDM2	R3H domain containing 2
gene19164_LOC110090710	neural cell adhesion molecule 1-like
gene19165_LOC110090702	B-cell receptor CD22-like
gene19167_LOC110090713	B-cell receptor CD22-like
gene19168_LOC110090703	B-cell receptor CD22-like
gene19180_CDK15	cyclin dependent kinase 15
gene19186_CD28	CD28 molecule
gene1919_SHMT2	serine hydroxymethyltransferase 2
gene19192_LOC110090736	thyroid adenoma-associated protein homolog
gene19203_PLEKHM1	pleckstrin homology and RUN domain containing M1
gene19219_TRIB1	tribbles pseudokinase 1
gene19223_COL4A1	collagen type IV alpha 1 chain
gene19227_FAM92B	family with sequence similarity 92 member B
gene19233_TMC2	transmembrane channel like 2
gene1924_NEMP1	nuclear envelope integral membrane protein 1
gene19241_MARCH8	membrane associated ring-CH-type finger 8
gene19242_LOC110090785	arachidonate 5-lipoxygenase-like
gene19252_MIEF2	mitochondrial elongation factor 2
gene19253_TOP3A	topoisomerase (DNA) III alpha
gene19257_PRPSAP2	phosphoribosyl pyrophosphate synthetase associated protein 2
gene19259_FAM83G	family with sequence similarity 83 member G
gene19264_LOC110090803	H-2 class II histocompatibility antigen
gene19268_LOC110090810	zinc finger protein 420-like
gene19270_LOC110090805	zinc finger protein 345-like
gene19274_LOC110090818	1-phosphatidylinositol 4
gene19279_LOC110090823	serine/threonine-protein kinase ULK4-like
gene19282_LRIG1	leucine rich repeats and immunoglobulin like domains 1
gene19285_RBCK1	RANBP2-type and C3HC4-type zinc finger containing 1
gene193_MTFR2	mitochondrial fission regulator 2
gene19307_ZIC3	Zic family member 3
gene1931_KRT18	keratin 18
gene1932_KRT8	keratin 8
gene19320_CALCOCO2	calcium binding and coiled-coil domain 2
gene19326_B4GALNT2	beta-1
gene1933_ITGA5	integrin subunit alpha 5
gene19332_LOC110090880	cilia- and flagella-associated protein 47-like
gene19333_LOC110090883	transmembrane gamma-carboxyglutamic acid protein 1-like
gene19338_PRDM15	PR/SET domain 15
gene19340_ZBTB21	zinc finger and BTB domain containing 21
gene19341_UMODL1	uromodulin like 1
gene19342_VIPR1	vasoactive intestinal peptide receptor 1
gene19345_NKTR	natural killer cell triggering receptor
gene19347_LOC110090894	otoconin-90-like
gene19363_LOC110090909	FXYD domain-containing ion transport regulator 3-like
gene19371_DDRGK1	DDRGK domain containing 1
gene19372_LOC110090919	uncharacterized LOC110090919
gene19376_LMX1A	LIM homeobox transcription factor 1 alpha
gene19382_CEP350	centrosomal protein 350
[truncated: 2,271 more rows]

## Sheet: ZWC5
Gene_ID	Gene_Name
gene0_LOC110083043	sine oculis-binding protein homolog
gene10003_RCBTB1	RCC1 and BTB domain containing protein 1
gene1001_FRS3	fibroblast growth factor receptor substrate 3
gene10024_RP2	RP2
gene10027_LOC110080695	regucalcin-like
gene10039_GHITM	growth hormone inducible transmembrane protein
gene1004_TOMM6	translocase of outer mitochondrial membrane 6
gene10053_LOC110080722	mitochondrial import inner membrane translocase subunit Tim23
gene10067_SOCS5	suppressor of cytokine signaling 5
gene1007_MED20	mediator complex subunit 20
gene10082_MRPL2	mitochondrial ribosomal protein L2
gene10090_LOC110080736	neuronal PAS domain-containing protein 4-like
gene10092_MEA1	male-enhanced antigen 1
gene10093_LOC110080753	serine/threonine-protein phosphatase 2A 56 kDa regulatory subunit delta isoform
gene101_TFB1M	transcription factor B1
gene1013_PIFO	primary cilia formation
gene10140_GPALPP1	GPALPP motifs containing 1
gene10143_TPT1	tumor protein
gene10145_ST3GAL5	ST3 beta-galactoside alpha-2
gene10147_FGFRL1	fibroblast growth factor receptor-like 1
gene10172_BLOC1S5	biogenesis of lysosomal organelles complex 1 subunit 5
gene10193_IRX4	iroquois homeobox 4
gene10195_LPCAT1	lysophosphatidylcholine acyltransferase 1
gene10206_CTNNAL1	catenin alpha like 1
gene10207_ELP2	elongator acetyltransferase complex subunit 2
gene10214_CMBL	carboxymethylenebutenolidase homolog
gene10245_GRM8	glutamate metabotropic receptor 8
gene10268_LOC110081032	calmodulin
gene10270_TMEM223	transmembrane protein 223
gene10273_WDR74	WD repeat domain 74
gene10277_MTA2	metastasis associated 1 family member 2
gene10285_ZBTB3	zinc finger and BTB domain containing 3
gene10287_LOC110081049	dapper 1-like
gene10288_TTC9C	tetratricopeptide repeat domain 9C
gene10290_LOC110080964	adenylosuccinate synthetase isozyme 2-like
gene10298_UBXN1	UBX domain protein 1
gene1030_PLEKHA6	pleckstrin homology domain containing A6
gene10302_SDHC	succinate dehydrogenase complex subunit C
gene10304_LOC110080981	zinc finger protein 628-like
gene10309_TOMM40L	translocase of outer mitochondrial membrane 40 like
gene10310_LOC110081014	uncharacterized LOC110081014
gene10312_UFC1	ubiquitin-fold modifier conjugating enzyme 1
gene10313_USP21	ubiquitin specific peptidase 21
gene10321_LOC110081013	ras-related protein Rab-1B
gene10325_NDUFS2	NADH:ubiquinone oxidoreductase core subunit S2
gene10328_RIT1	Ras like without CAAX 1
gene10346_MTX1	metaxin 1
gene10362_FLAD1	flavin adenine dinucleotide synthetase 1
gene10366_PMVK	phosphomevalonate kinase
gene10368_ADAR	adenosine deaminase
gene10370_UBE2Q1	ubiquitin conjugating enzyme E2 Q1
gene10377_AURKA	aurora kinase A
gene10386_RAE1	ribonucleic acid export 1
gene10405_SH3GL2	SH3 domain containing GRB2 like 2
gene10408_NFIL3	nuclear factor
gene10413_LYRM7	LYR motif containing 7
gene10414_HINT1	histidine triad nucleotide binding protein 1
gene1042_RBBP5	RB binding protein 5
gene10426_CXXC1	CXXC finger protein 1
gene10440_UBA1	ubiquitin like modifier activating enzyme 1
gene10447_UXT	ubiquitously expressed prefoldin like chaperone
gene10455_ARAF	A-Raf proto-oncogene
gene10474_LOC110081131	RNA-binding protein 3-like
gene10476_LOC110081132	cold-inducible RNA-binding protein-like
gene10479_ABT1	activator of basal transcription 1
gene10481_LOC110081178	ZW10 interactor-like
gene10482_WDR13	WD repeat domain 13
gene10492_GPKOW	G-patch domain and KOW motifs
gene10496_TFE3	transcription factor binding to IGHM enhancer 3
gene10497_GRIPAP1	GRIP1 associated protein 1
gene1050_CDK18	cyclin dependent kinase 18
gene10511_CDC123	cell division cycle 123
gene10512_NUDT5	nudix hydrolase 5
gene10529_ARNTL2	aryl hydrocarbon receptor nuclear translocator like 2
gene10545_LOC110081252	glutathione S-transferase-like
gene10548_CCDC102A	coiled-coil domain containing 102A
gene10554_TMEM170A	transmembrane protein 170A
gene10555_CFDP1	craniofacial development protein 1
gene10556_BCAR1	BCAR1
gene10557_LDHD	lactate dehydrogenase D
gene10558_ZNRF1	zinc and ring finger 1
gene10559_WDR59	WD repeat domain 59
gene10568_CEBPG	CCAAT/enhancer binding protein gamma
gene10569_PEPD	peptidase D
gene10576_UBA2	ubiquitin like modifier activating enzyme 2
[truncated: 2,908 more rows]

## Sheet: ZWC6
Gene_ID	Gene_Name
[truncated: 1,600 more rows]

## Sheet: ZZC1
Gene_ID	Gene_Name
[truncated: 3,470 more rows]

[truncated: 7 more sheets: ZZC2, ZZC3, ZZC4, ZZC5, ZZC6, ZZC1_ZWC1_Combo, ZZC2_ZWC4_Combo]
